# Supplementary material for: Molecular Evolution of Pseudomonas syringae Type III Secreted Effector Proteins
Source: Front Plant Sci. 2019 Apr 5;10:418. doi: 10.3389/fpls.2019.00418 (PMC6460904; doi:10.3389/fpls.2019.00418)
Supplement: Supplementary file 11 [file Data_Sheet_1.xlsx]

## Sheet: Sheet1
Genus	Species	Subsp	Pathovar	Phylogroup	Subgroup	Type Status	Strain Designation	Isolation Date	Country of Isolation	Region of Isolation	Host Common Name	Host Species	Host Genus	Host Family	Source	Accession Number
Pseudomonas	syringae	NA	apii	1	1a	NA	Pap1089_5	NA	USA	California	celery	Apium graveolens	Apium	Apiaceae	NA	RBPL00000000
Pseudomonas	syringae	NA	apii	1	1a	NA	PapICMP1657	NA	USA	Michigan	celery	Apium graveolens	Apium	Apiaceae	NA	RBPC00000000
Pseudomonas	syringae	NA	apii	1	1a	NA	PapICMP1659	NA	USA	Michigan	celery	Apium graveolens	Apium	Apiaceae	NA	RBPB00000000
Pseudomonas	syringae	NA	apii	1	1a	Pathotype strain	PapICMP2814	NA	USA	NA	celery	Apium graveolens	Apium	Apiaceae	NA	LJPR00000000
Pseudomonas	syringae	NA	antirrhini	1	1a	NA	PatICMP2813	NA	Australia	NA	snapdragon	Antirrhinum majus	Antirrhinum	Plantaginaceae	NA	RBVI00000000
Pseudomonas	syringae	NA	antirrhini	1	1a	Pathotype strain	PatICMP4303	NA	United Kingdom	NA	snapdragon	Antirrhinum majus	Antirrhinum	Plantaginaceae	NA	LJPT00000000
Pseudomonas	syringae	NA	antirrhini	1	1a	NA	PatICMP4453	NA	United Kingdom	NA	snapdragon	Antirrhinum majus	Antirrhinum	Plantaginaceae	NA	RBQL00000000
Pseudomonas	syringae	NA	antirrhini	1	1a	NA	PatICMP4959	NA	United Kingdom	NA	snapdragon	Antirrhinum majus	Antirrhinum	Plantaginaceae	NA	RBQK00000000
Pseudomonas	syringae	NA	berberidis	1	1a	NA	PbbICMP13291	NA	New Zealand	Te Puke	barberry	Berberis sp.	Berberis	Berberidaceae	NA	RBQP00000000
Pseudomonas	syringae	NA	berberidis	1	1a	NA	PbbICMP4065	NA	New Zealand	Otara	barberry	Berberis sp.	Berberis	Berberidaceae	NA	RBRC00000000
Pseudomonas	syringae	NA	berberidis	1	1a	Pathotype strain	PbbICMP4116	NA	New Zealand	Otara	barberry	Berberis sp.	Berberis	Berberidaceae	NA	LJPU00000000
Pseudomonas	syringae	NA	berberidis	1	1a	NA	PbbICMP8899	NA	NA	NA	barberry	Berberis gagnepainii	Berberis	Berberidaceae	NA	RBOD00000000
Pseudomonas	syringae	NA	coriandricola	1	1a	NA	PcdICMP9625	NA	New Zealand	Ashburton	cilantro	Coriandrum sativum	Coriandrum	Apiaceae	NA	RBRV00000000
Pseudomonas	syringae	NA	coriandricola	1	1a	NA	PcdICMP9829	NA	India	NA	cilantro	Coriandrum sativum	Coriandrum	Apiaceae	NA	RBTT00000000
Pseudomonas	syringae	NA	lachrymans	1	1a	NA	Pla302278PT	NA	USA	NA	cucumber	Cucumis sativus	Cucumis	Cucurbitaceae	Baltrus DA et al., 2011	AEAM00000000
Pseudomonas	syringae	NA	lachrymans	1	1a	NA	Pla3988	1935	USA	NA	cucumber	Cucumis sativus	Cucumis	Cucurbitaceae	NA	LGLJ00000000
Pseudomonas	syringae	NA	lachrymans	1	1a	NA	PlaA7386	NA	NA	NA	cucumber	Cucumis sativus	Cucumis	Cucurbitaceae	NA	RBOB00000000
Pseudomonas	syringae	NA	maculicola	1	1a	NA	Pma4981	NA	Zimbabwe	NA	cauliflower	Brassica oleracea	Brassica	Brassicaceae	NA	RBOO00000000
Pseudomonas	syringae	NA	maculicola	1	1a	NA	Pma88_10	1988	USA	California	cauliflower	Brassica oleracea	Brassica	Brassicaceae	NA	RBNL00000000
Pseudomonas	syringae	NA	maculicola	1	1a	NA	Pma90_32	1990	USA	California	cauliflower	Brassica oleracea	Brassica	Brassicaceae	NA	LGLH00000000
Pseudomonas	syringae	NA	maculicola	1	1a	NA	PmaH7608	1976	NA	NA	cabbage	Brassica campestris	Brassica	Brassicaceae	NA	LGLG00000000
Pseudomonas	syringae	NA	maculicola	1	1a	NA	PmaICMP11281	NA	China	Jiangsu	raab	Brassica rapa	Brassica	Brassicaceae	NA	RBUQ00000000
Pseudomonas	syringae	NA	maculicola	1	1a	NA	PmaICMP2744	NA	United Kingdom	Norfolk	mustard	Brassica nigra	Brassica	Brassicaceae	NA	RBQA00000000
Pseudomonas	syringae	NA	maculicola	1	1a	Pathotype strain	PmaICMP3935	NA	New Zealand	NA	cauliflower	Brassica oleracea	Brassica	Brassicaceae	NA	LJQR00000000
Pseudomonas	syringae	NA	maculicola	1	1a	NA	PmaM4a	1965	USA	NA	radish	Raphanus sativus	Raphanus	Brassicaceae	NA	LGLE00000000
Pseudomonas	syringae	NA	maculicola	1	1a	NA	PmaM6	1965	United Kingdom	NA	cauliflower	Brassica oleracea	Brassica	Brassicaceae	NA	LGLC00000000
Pseudomonas	syringae	NA	philadelphi	1	1a	Pathotype strain	PpdICMP8903	NA	United Kingdom	Swillington, West Yorkshire	mock orange	Philadelphus coronarius	Philadelphus	Hydrangeaceae	NA	LJQY00000000
Pseudomonas	syringae	NA	persicae	1	1a	NA	PpeICMP5786	NA	New Zealand	Earnscleugh	nectarine	Prunus persica	Prunus	Rosaceae	NA	RBRT00000000
Pseudomonas	syringae	NA	spinaceae	1	1a	NA	PspICMP16928	NA	Japan	NA	spinach	Spinacia oleracea	Spinacia	Amaranthaceae	NA	RBTF00000000
Pseudomonas	syringae	NA	spinaceae	1	1a	Pathotype strain	PspICMP16929	NA	Japan	NA	spinach	Spinacia oleracea	Spinacia	Amaranthaceae	NA	LJRI00000000
Pseudomonas	syringae	NA	syringae	1	1a	NA	PsyCC1630	NA	USA	NA	sainfoin	Onobrychis	Onobrychis	Fabaceae	Baltrus DA et al., 2014	AVED00000000
Pseudomonas	syringae	NA	tagetis	1	1a	NA	PtgICMP4092	NA	United Kingdom	NA	marigold	Tagetes erecta	Tagetes	Asteraceae	NA	RBQC00000000
Pseudomonas	syringae	NA	tomato	1	1a	NA	Pto1108	NA	NA	NA	tomato	Lycopersicon esculentum	Lycopersicon	Solanaceae	Cai R., et al 2011	ADGA00000000
Pseudomonas	syringae	NA	tomato	1	1a	NA	PtoDC3000	NA	United Kingdom	NA	tomato	Lycopersicon esculentum	Lycopersicon	Solanaceae	Buell CR et al., 2003	AE016853
Pseudomonas	syringae	NA	tomato	1	1a	NA	PtoICMP2841	NA	Denmark	NA	tomato	Lycopersicon esculentum	Lycopersicon	Solanaceae	NA	RBUK00000000
Pseudomonas	syringae	NA	tomato	1	1a	Pathotype strain	PtoICMP2844	1960	United Kingdom	Guernsey, Channel Islands	tomato	Lycopersicon esculentum	Lycopersicon	Solanaceae	NA	LJRN00000000
Pseudomonas	syringae	NA	tomato	1	1a	NA	PtoICMP4263	NA	New Zealand	Levin	tomato	Lycopersicon esculentum	Lycopersicon	Solanaceae	NA	RBRJ00000000
Pseudomonas	syringae	NA	tomato	1	1a	NA	PtoICMP7230	NA	New Zealand	Mangere	tomato	Lycopersicon esculentum	Lycopersicon	Solanaceae	NA	RBRI00000000
Pseudomonas	syringae	NA	tomato	1	1a	NA	PtoK40	2005	USA	Virginia	tomato	Lycopersicon esculentum	Lycopersicon	Solanaceae	Cai R., et al 2011	ADFY00000000
Pseudomonas	syringae	NA	tomato	1	1a	NA	PtoMax13	NA	France	NA	tomato	Lycopersicon esculentum	Lycopersicon	Solanaceae	Cai R., et al 2011	ADFZ00000000
Pseudomonas	syringae	NA	tomato	1	1a	NA	PtoT1	1986	Canada	Ontario	tomato	Lycopersicon esculentum	Lycopersicon	Solanaceae	Almeida NF et al., 2009	ABSM01000115
Pseudomonas	syringae	NA	avellanae	1	1b	NA	Pav631	1976	Greece	Drama	hazelnut	Corylus avellana	Corylus	Betulaceae	O' Brien H et al., 2012	AKBS01000000
Pseudomonas	syringae	NA	avellanae	1	1b	NA	PavICMP9749	NA	Greece	Mouries, Kilkis	hazelnut	Corylus avellana	Corylus	Betulaceae	NA	RBTX00000000
Pseudomonas	syringae	NA	delphinii	1	1b	NA	PdpICMP13052	NA	New Zealand	Pukekohe	delphinium	Delphinium sp.	Delphinium	Ranunculaceae	NA	RBRA00000000
Pseudomonas	syringae	NA	delphinii	1	1b	NA	PdpICMP4330	NA	United Kingdom	NA	delphinium	Delphinium sp.	Delphinium	Ranunculaceae	NA	RBQG00000000
Pseudomonas	syringae	NA	delphinii	1	1b	NA	PdpICMP5014	NA	United Kingdom	NA	delphinium	Delphinium elatum	Delphinium	Ranunculaceae	NA	RBQH00000000
Pseudomonas	syringae	NA	delphinii	1	1b	Pathotype strain	PdpICMP529	NA	New Zealand	Palmerston North	delphinium	Delphinium sp.	Delphinium	Ranunculaceae	NA	LJQH00000000
Pseudomonas	syringae	NA	morsprunorum	1	1b	NA	Pmp19322	NA	NA	NA	plum	Prunus domestica	Prunus	Rosaceae	NA	RBNS00000000
Pseudomonas	syringae	NA	morsprunorum	1	1b	NA	Pmp302280PT	NA	NA	NA	plum	Prunus domestica	Prunus	Rosaceae	Baltrus DA et al., 2011	AEAE00000000
Pseudomonas	syringae	NA	primulae	1	1b	NA	PprICMP18417	NA	France	Royaume	polyanthus	Primula sp.	Primula	Primulaceae	NA	RBTZ00000000
Pseudomonas	syringae	NA	primulae	1	1b	NA	PprICMP2732	NA	United Kingdom	Warwickshire	polyanthus	Primula polyantha	Primula	Primulaceae	NA	RBPY00000000
Pseudomonas	syringae	NA	primulae	1	1b	NA	PprICMP8670	NA	New Zealand	Hamilton	polyanthus	Primula polyantha	Primula	Primulaceae	NA	RBRQ00000000
Pseudomonas	syringae	NA	ribicola	1	1b	NA	PriICMP3883	NA	NA	NA	currant	Ribes aureum	Ribes	Grossulariaceae	NA	RBNR00000000
Pseudomonas	syringae	NA	actinidiae	1	1b	NA	Psa302091	1984	Japan	Kanagawa	kiwifruit	Actinidia deliciosa	Actinidia	Actinidiaceae	Baltrus DA et al., 2011	AEAL00000000
Pseudomonas	syringae	NA	actinidiae	1	1b	NA	PsaCFBP7286	2008	Italy	Lazio	kiwifruit	Actinidia chinensis	Actinidia	Actinidiaceae	Mazzaglia A et al. 2012	AGNO00000000
Pseudomonas	syringae	NA	actinidiae	1	1b	NA	PsaCH2010_6	2010	China	Shaanxi	kiwifruit	Actinidia chinensis	Actinidia	Actinidiaceae	Mazzaglia A et al. 2012	AGUH00000000
Pseudomonas	syringae	NA	actinidiae	1	1b	NA	PsaCRAFRU8_43	NA	Italy	Latina	kiwifruit	Actinidia chinensis	Actinidia	Actinidiaceae	Marceletti S et al., 2011	AFTG00000000
Pseudomonas	syringae	NA	actinidiae	1	1b	NA	PsaICMP18708	NA	New Zealand	Te Puke	kiwifruit	Actinidia chinensis	Actinidia	Actinidiaceae	NA	ANJC00000000
Pseudomonas	syringae	NA	actinidiae	1	1b	NA	PsaICMP18744	NA	Italy	Rome	kiwifruit	Actinidia deliciosa	Actinidia	Actinidiaceae	Butler MI et al., 2013	ANGD00000000
Pseudomonas	syringae	NA	actinidiae	1	1b	NA	PsaICMP18800	2010	New Zealand	Paengaroa	kiwifruit	Actinidia deliciosa	Actinidia	Actinidiaceae	Butler MI et al., 2013	ANJD00000000
Pseudomonas	syringae	NA	actinidiae	1	1b	NA	PsaICMP18801	2010	New Zealand	Te Puke	kiwifruit	Actinidia chinensis	Actinidia	Actinidiaceae	McCann H et al., 2013	AOKQ00000000
Pseudomonas	syringae	NA	actinidiae	1	1b	NA	PsaICMP18803	2010	New Zealand	Hastings	kiwifruit	Actinidia chinensis	Actinidia	Actinidiaceae	McCann H et al., 2013	AOKK00000000
Pseudomonas	syringae	NA	actinidiae	1	1b	NA	PsaICMP18804	2010	New Zealand	Te Puke	kiwifruit	Actinidia chinensis	Actinidia	Actinidiaceae	McCann H et al., 2013	ANJE00000000
Pseudomonas	syringae	NA	actinidiae	1	1b	NA	PsaICMP18807	2010	New Zealand	Tauranga	kiwifruit	Actinidia deliciosa	Actinidia	Actinidiaceae	McCann H et al., 2013	ANJL00000000
Pseudomonas	syringae	NA	actinidiae	1	1b	NA	PsaICMP18883	2010	New Zealand	Anatoki	kiwifruit	Actinidia deliciosa	Actinidia	Actinidiaceae	McCann H et al., 2013	AOKH00000000
Pseudomonas	syringae	NA	actinidiae	1	1b	NA	PsaICMP18884	2010	New Zealand	Rangiuru	kiwifruit	Actinidia deliciosa	Actinidia	Actinidiaceae	McCann H et al., 2013	CM002751
Pseudomonas	syringae	NA	actinidiae	1	1b	NA	PsaICMP18886	2010	New Zealand	Te Puke	kiwifruit	Actinidia deliciosa	Actinidia	Actinidiaceae	McCann H et al., 2013	AOJT00000000
Pseudomonas	syringae	NA	actinidiae	1	1b	NA	PsaICMP19068	1988	Japan	Wakayama	kiwifruit	Actinidia deliciosa	Actinidia	Actinidiaceae	McCann H et al., 2013	AOJX01000000
Pseudomonas	syringae	NA	actinidiae	1	1b	NA	PsaICMP19070	1987	Japan	Kanagawa	kiwifruit	Actinidia deliciosa	Actinidia	Actinidiaceae	McCann H et al., 2013	AOJY01000000
Pseudomonas	syringae	NA	actinidiae	1	1b	NA	PsaICMP19071	NA	Republic of Korea	Jeonnam	kiwifruit	Actinidia chinensis	Actinidia	Actinidiaceae	NA	AOJS00000000
Pseudomonas	syringae	NA	actinidiae	1	1b	NA	PsaICMP19072	1997	Republic of Korea	Jeonnam	kiwifruit	Actinidia chinensis	Actinidia	Actinidiaceae	McCann H et al., 2013	AOJW01000000
Pseudomonas	syringae	NA	actinidiae	1	1b	NA	PsaICMP19073	1998	Republic of Korea	Jeonnam	kiwifruit	Actinidia chinensis	Actinidia	Actinidiaceae	McCann H et al., 2013	AOJR01000000
Pseudomonas	syringae	NA	actinidiae	1	1b	NA	PsaICMP19074	NA	New Zealand	Pongakawa	kiwifruit	Actinidia chinensis	Actinidia	Actinidiaceae	NA	RBRB00000000
Pseudomonas	syringae	NA	actinidiae	1	1b	NA	PsaICMP19079	2010	Italy	Latina	kiwifruit	Actinidia chinensis	Actinidia	Actinidiaceae	McCann H et al., 2013	AOKL01000000
Pseudomonas	syringae	NA	actinidiae	1	1b	NA	PsaICMP19094	2010	New Zealand	Te Puke	kiwifruit	Actinidia chinensis	Actinidia	Actinidiaceae	McCann H et al., 2013	AOKJ01000000
Pseudomonas	syringae	NA	actinidiae	1	1b	NA	PsaICMP19095	2010	New Zealand	Te Puke	kiwifruit	Actinidia chinensis	Actinidia	Actinidiaceae	McCann H et al., 2013	AOKI01000000
Pseudomonas	syringae	NA	actinidiae	1	1b	NA	PsaICMP19096	2010	New Zealand	Te Puke	kiwifruit	Actinidia chinensis	Actinidia	Actinidiaceae	McCann H et al., 2013	AOKF01000000
Pseudomonas	syringae	NA	actinidiae	1	1b	NA	PsaICMP19097	2010	New Zealand	Te Puke	kiwifruit	Actinidia chinensis	Actinidia	Actinidiaceae	McCann H et al., 2013	AOKN01000000
Pseudomonas	syringae	NA	actinidiae	1	1b	NA	PsaICMP19098	2010	New Zealand	Motueka	kiwifruit	Actinidia chinensis	Actinidia	Actinidiaceae	McCann H et al., 2013	AOKE01000000
Pseudomonas	syringae	NA	actinidiae	1	1b	NA	PsaICMP19099	2010	New Zealand	Te Puke	kiwifruit	Actinidia chinensis	Actinidia	Actinidiaceae	McCann H et al., 2013	AOKD01000000
Pseudomonas	syringae	NA	actinidiae	1	1b	NA	PsaICMP19100	2010	New Zealand	Te Puke	kiwifruit	Actinidia chinensis	Actinidia	Actinidiaceae	McCann H et al., 2013	AOKC01000000
Pseudomonas	syringae	NA	actinidiae	1	1b	NA	PsaICMP19101	2010	New Zealand	Te Puke	kiwifruit	Actinidia deliciosa	Actinidia	Actinidiaceae	McCann H et al., 2013	AOKM01000000
Pseudomonas	syringae	NA	actinidiae	1	1b	NA	PsaICMP19102	1987	Japan	Kanagawa	kiwifruit	Actinidia arguta	Actinidia	Actinidiaceae	McCann H et al., 2013	AOKA01000000
Pseudomonas	syringae	NA	actinidiae	1	1b	NA	PsaICMP19103	1987	Japan	Kanagawa	kiwifruit	Actinidia arguta	Actinidia	Actinidiaceae	McCann H et al., 2013	AOJQ01000000
Pseudomonas	syringae	NA	actinidiae	1	1b	NA	PsaICMP19104	1988	Japan	Wakayama	kiwifruit	Actinidia deliciosa	Actinidia	Actinidiaceae	McCann H et al., 2013	AOJZ01000000
Pseudomonas	syringae	NA	actinidiae	1	1b	NA	PsaICMP19439	2011	Chile	Region of Maule	kiwifruit	Actinidia deliciosa	Actinidia	Actinidiaceae	Butler MI et al., 2013	ANJM00000000
Pseudomonas	syringae	NA	actinidiae	1	1b	NA	PsaICMP19455	2011	Chile	Region of Maule	kiwifruit	Actinidia deliciosa	Actinidia	Actinidiaceae	Butler MI et al., 2013	ANJK00000000
Pseudomonas	syringae	NA	actinidiae	1	1b	NA	PsaICMP9617	1984	Japan	Shizuoka	kiwifruit	Actinidia deliciosa	Actinidia	Actinidiaceae	McCann H et al., 2013	CM002753
Pseudomonas	syringae	NA	actinidiae	1	1b	NA	PsaICMP9853	1984	Japan	Shizuoka	kiwifruit	Actinidia deliciosa	Actinidia	Actinidiaceae	Butler MI et al., 2013	ANJB00000000
Pseudomonas	syringae	NA	actinidiae	1	1b	NA	PsaICMP9855	NA	Japan	Shizuoka	kiwifruit	Actinidia deliciosa	Actinidia	Actinidiaceae	NA	AOKB00000000
Pseudomonas	syringae	NA	actinidiae	1	1b	NA	PsaKW41	1984	Japan	Shizuoka	kiwifruit	Actinidia chinensis	Actinidia	Actinidiaceae	Mazzaglia A et al. 2012	AGNP00000000
Pseudomonas	syringae	NA	actinidiae	1	1b	NA	PsaNCPPB3739	1984	Japan	Shizuoka	kiwifruit	Actinidia deliciosa	Actinidia	Actinidiaceae	Marceletti S et al., 2011	AFTH01000000
Pseudomonas	syringae	NA	actinidiae	1	1b	NA	PsaNCPPB3871	1992	Italy	Roma	kiwifruit	Actinidia chinensis	Actinidia	Actinidiaceae	Marceletti S et al., 2011	AFTF00000000
Pseudomonas	syringae	NA	actinidiae	1	1b	NA	PsaPA459	1988	Japan	NA	kiwifruit	Actinidia chinensis	Actinidia	Actinidiaceae	Mazzaglia A et al. 2012	AGNQ00000000
Pseudomonas	syringae	NA	actinidiae	1	1b	NA	PsaShaanxi_M228	2010	China	Shaanxi	kiwifruit	Actinidia sp.	Actinidia	Actinidiaceae	Butler MI et al., 2013	ANJI00000000
Pseudomonas	syringae	NA	actinidiae	1	1b	NA	PsaShaanxi_M7	2010	China	Shaanxi	kiwifruit	Actinidia sp.	Actinidia	Actinidiaceae	Butler MI et al., 2013	ANJJ00000000
Pseudomonas	syringae	NA	actinidiae	1	1b	NA	PsaTP1	2011	New Zealand	NA	kiwifruit	Actinidia sp.	Actinidia	Actinidiaceae	Butler MI et al., 2013	ANJG00000000
Pseudomonas	syringae	NA	actinidiae	1	1b	NA	PsaTP6_1	2011	New Zealand	NA	kiwifruit	Actinidia sp.	Actinidia	Actinidiaceae	Butler MI et al., 2013	ANJH00000000
Pseudomonas	syringae	NA	syringae	1	1b	NA	PsyCC1416	NA	USA	Montana	NA	NA	NA	NA	Baltrus DA et al., 2014	AVEP00000000
Pseudomonas	syringae	NA	syringae	1	1b	NA	PsyCC1544	NA	France	NA	NA	NA	NA	NA	Baltrus DA et al., 2014	AVEI00000000
Pseudomonas	syringae	NA	syringae	1	1b	NA	PsyCC1559	NA	France	NA	NA	NA	NA	NA	Baltrus DA et al., 2014	AVEG00000000
Pseudomonas	syringae	NA	syringae	1	1b	NA	PsyICMP18806	2010	New Zealand	Pongakawa	kiwifruit	Actinidia chinensis	Actinidia	Actinidiaceae	Butler MI et al., 2013	ANJF00000000
Pseudomonas	syringae	NA	syringae	1	1b	NA	PsyUSA007	2007	USA	Wyoming	NA	NA	NA	NA	Baltrus DA et al., 2014	AVDY00000000
Pseudomonas	syringae	NA	theae	1	1b	Pathotype strain	PthICMP3923	1970	Japan	Shizuoka Prefecture	tea	Camellia sinensis	Camellia	Theaceaea	NA	AOJV00000000
Pseudomonas	syringae	NA	theae	1	1b	NA	PthICMP3934	NA	Japan	NA	tea	Camellia sinensis	Camellia	Theaceaea	NA	RBTL00000000
Pseudomonas	syringae	NA	theae	1	1b	NA	PthNCPPB2598	NA	Japan	Shizuoka Prefecture	tea	Camellia sinensis	Camellia	Theaceaea	Scortichini,M., et al 2013	ATDJ00000000
Pseudomonas	syringae	NA	viburni	1	1b	Pathotype strain	PviICMP3963	NA	USA	NA	viburnum	Viburnum	Viburnum	Adoxaceae	NA	LJRR00000000
Pseudomonas	syringae	NA	syringae	2	2	NA	Psy0529	2013	Canada	Alberta	bean	Phaseolus vulgaris	Phaseolus	Fabaceae	NA	QPBJ00000000
Pseudomonas	syringae	NA	syringae	2	2	NA	Psy0536	2013	Canada	Alberta	bean	Phaseolus vulgaris	Phaseolus	Fabaceae	NA	QPBP00000000
Pseudomonas	syringae	NA	syringae	2	2	NA	Psy0537	2013	Canada	Alberta	bean	Phaseolus vulgaris	Phaseolus	Fabaceae	NA	QPBQ00000000
Pseudomonas	syringae	NA	syringae	2	2	NA	Psy0538	2013	Canada	Alberta	bean	Phaseolus vulgaris	Phaseolus	Fabaceae	NA	QPBR00000000
Pseudomonas	syringae	NA	syringae	2	2	NA	Psy0540	2013	Canada	Alberta	bean	Phaseolus vulgaris	Phaseolus	Fabaceae	NA	QPBS00000000
Pseudomonas	syringae	NA	syringae	2	2	NA	Psy0541	2013	Canada	Alberta	bean	Phaseolus vulgaris	Phaseolus	Fabaceae	NA	QPBT00000000
Pseudomonas	syringae	NA	syringae	2	2	NA	Psy0542	2013	Canada	Alberta	bean	Phaseolus vulgaris	Phaseolus	Fabaceae	NA	QPBU00000000
Pseudomonas	syringae	NA	syringae	2	2	NA	Psy0543	2013	Canada	Alberta	bean	Phaseolus vulgaris	Phaseolus	Fabaceae	NA	QPBV00000000
Pseudomonas	syringae	NA	syringae	2	2	NA	Psy0544	2013	Canada	Alberta	bean	Phaseolus vulgaris	Phaseolus	Fabaceae	NA	QPBW00000000
Pseudomonas	syringae	NA	syringae	2	2	NA	Psy0545	2013	Canada	Alberta	bean	Phaseolus vulgaris	Phaseolus	Fabaceae	NA	QPBX00000000
Pseudomonas	syringae	NA	syringae	2	2	NA	Psy0547	2013	Canada	Alberta	bean	Phaseolus vulgaris	Phaseolus	Fabaceae	NA	QPBY00000000
Pseudomonas	syringae	NA	syringae	2	2	NA	Psy0548	2013	Canada	Alberta	bean	Phaseolus vulgaris	Phaseolus	Fabaceae	NA	QPBZ00000000
Pseudomonas	syringae	NA	syringae	2	2	NA	Psy0549	2013	Canada	Alberta	bean	Phaseolus vulgaris	Phaseolus	Fabaceae	NA	QPCA00000000
Pseudomonas	syringae	NA	syringae	2	2	NA	Psy0550	2013	Canada	Alberta	bean	Phaseolus vulgaris	Phaseolus	Fabaceae	NA	QPCB00000000
Pseudomonas	syringae	NA	syringae	2	2	NA	Psy0551	2013	Canada	Alberta	bean	Phaseolus vulgaris	Phaseolus	Fabaceae	NA	QPCC00000000
Pseudomonas	syringae	NA	syringae	2	2	NA	Psy0552	2013	Canada	Alberta	bean	Phaseolus vulgaris	Phaseolus	Fabaceae	NA	QPCD00000000
Pseudomonas	syringae	NA	syringae	2	2	NA	Psy0554	2013	Canada	Alberta	bean	Phaseolus vulgaris	Phaseolus	Fabaceae	NA	QPCE00000000
Pseudomonas	syringae	NA	syringae	2	2	NA	Psy0555	2013	Canada	Alberta	bean	Phaseolus vulgaris	Phaseolus	Fabaceae	NA	QPCF00000000
Pseudomonas	syringae	NA	aceris	2	2a	NA	PacICMP9850	1983	Japan	Tokyo	maple	Acer buergeranum	Acer	Aceraceae	NA	RBSM00000000
Pseudomonas	syringae	NA	aceris	2	2a	NA	PacICMP9851	1984	Japan	Shizuoka	maple	Acer buergeranum	Acer	Aceraceae	NA	RBST00000000
Pseudomonas	syringae	NA	aceris	2	2a	NA	PacICMP9852	1983	Japan	Shizuoka	maple	Acer buergeranum	Acer	Aceraceae	NA	RBSS00000000
Pseudomonas	syringae	NA	papulans	2	2a	NA	PppICMP4040	NA	USA	Michigan	apple	Malus domestica	Malus	Rosaceae	NA	RBPA00000000
Pseudomonas	syringae	NA	papulans	2	2a	Pathotype strain	PppICMP4048	NA	Canada	Ontario	apple	Malus domestica	Malus	Rosaceae	NA	LJRB00000000
Pseudomonas	syringae	NA	papulans	2	2a	NA	PppICMP4050	NA	Canada	Olinda, Ontario	apple	Malus domestica	Malus	Rosaceae	NA	RBUS00000000
Pseudomonas	syringae	NA	papulans	2	2a	NA	PppICMP4986	NA	USA	East Lansing, Michigan	apple	Malus domestica	Malus	Rosaceae	NA	RBPE00000000
Pseudomonas	syringae	NA	syringae	2	2a	NA	PsA2	NA	NA	NA	ornamental pear	Pyrus calleryana	Pyrus	Rosaceae	NA	LGKU00000000
Pseudomonas	syringae	NA	NA	2	2a	NA	PsCit7	NA	NA	NA	orange	Citrus sinensis	Citrus	Rutaceae	Baltrus DA et al., 2011	AEAJ00000000
Pseudomonas	syringae	NA	syringae	2	2a	NA	PsyBRIP39023	1971	Australia	NA	barley	Hordeum vulgare	Hordeum	Poaceae	Gardiner DM, et al 2013	AMZX00000000
Pseudomonas	syringae	NA	aptata	2	2a	NA	PttG733	1976	NA	NA	rice	Oryza sativa	Oryza	Poaceae	NA	RBOI00000000
Pseudomonas	syringae	NA	atrofaciens	2	2b	NA	PafDSM5025	NA	NA	NA	wheat	Triticum aestivum	Triticum	Poaceae	NA	RBNQ00000000
Pseudomonas	syringae	NA	atrofaciens	2	2b	NA	PafICMP1852	NA	New Zealand	Waikari	wheat	Triticum aestivum	Triticum	Poaceae	NA	RBQO00000000
Pseudomonas	syringae	NA	atrofaciens	2	2b	Pathotype strain	PafICMP4394	NA	New Zealand	Auckland	wheat	Triticum aestivum	Triticum	Poaceae	NA	LJPO00000000
Pseudomonas	syringae	NA	atrofaciens	2	2b	NA	PafICMP5011	NA	Zimbabwe	NA	wheat	Triticum aestivum	Triticum	Poaceae	NA	RBOK00000000
Pseudomonas	syringae	NA	eriobotryae	2	2b	NA	PerICMP4967	NA	USA	NA	loquat	Eriobotrya japonica	Eriobotrya	Rosaceae	NA	RBPU00000000
Pseudomonas	syringae	NA	japonica	2	2b	NA	Pja301072	NA	Japan	Tochigi	barley	Hordeum vulgare	Hordeum	Poaceae	Baltrus DA et al., 2011	AEAH00000000
Pseudomonas	syringae	NA	lachrymans	2	2b	NA	Pla1188_1	NA	USA	California	zucchini	Cucurbita pepo	Cucurbita	Cucurbitaceae	NA	RBPG00000000
Pseudomonas	syringae	NA	lapsa	2	2b	NA	PlpICMP3946	NA	NA	NA	NA	NA	NA	Poaceae	NA	RBNO00000000
Pseudomonas	syringae	NA	lapsa	2	2b	Pathotype strain	PlpICMP3947	NA	NA	NA	corn	Zea sp.	Zea	Poaceae	NA	LJQQ00000000
Pseudomonas	syringae	NA	lapsa	2	2b	NA	PlpICMP8813	NA	NA	NA	NA	NA	NA	Poaceae	NA	RBNN00000000
Pseudomonas	syringae	NA	panici	2	2b	NA	PpaLMG2367	NA	NA	NA	millet	Panicum miliaceum	Panicum	Fabaceae	Liu H et al., 2012	ALAC01000000
Pseudomonas	syringae	NA	phaseolicola	2	2b	NA	Pph1449B	1985	Ethiopia	NA	hyacinth bean	Lablab purpureus	Lablab	Fabaceae	NA	RBUI00000000
Pseudomonas	syringae	NA	pisi	2	2b	NA	Ppi1704B	NA	NA	NA	pea	Pisum sativum	Pisum	Fabaceae	Baltrus DA et al., 2011	AEAI00000000
Pseudomonas	syringae	NA	pisi	2	2b	NA	Ppi895A	NA	NA	NA	pea	Pisum sativum	Pisum	Fabaceae	NA	RBNU00000000
Pseudomonas	syringae	NA	pisi	2	2b	NA	PpiH5E3	1993	NA	NA	pea	Pisum sativum	Pisum	Fabaceae	NA	RBOF00000000
Pseudomonas	syringae	NA	pisi	2	2b	NA	PpiH6E5	1994	NA	NA	pea	Pisum sativum	Pisum	Fabaceae	NA	RBOE00000000
Pseudomonas	syringae	NA	pisi	2	2b	NA	PpiICMP2788	NA	USA	NA	pea	Pisum sativum	Pisum	Fabaceae	NA	RBPQ00000000
Pseudomonas	syringae	NA	pisi	2	2b	NA	PpiICMP4433	NA	Canada	NA	pea	Pisum sativum	Pisum	Fabaceae	NA	RBUV00000000
Pseudomonas	syringae	NA	pisi	2	2b	NA	PpiR6a	NA	NA	NA	pea	Pisum sativum	Pisum	Fabaceae	NA	RBNT00000000
Pseudomonas	syringae	NA	striafaciens	2	2b	NA	PsfICMP4996	NA	Mexico	NA	triticale	Triticosecale sp.	Triticosecale	Poaceae	NA	RBSD00000000
Pseudomonas	syringae	NA	syringae	2	2b	NA	PsyB64	NA	USA	Minnesota	wheat	Triticum aestivum	Triticum	Poaceae	Dudnik A, Dudler R. 2013	ANZF00000000
Pseudomonas	syringae	NA	syringae	2	2b	NA	PsyBRIP34876	1971	Australia	NA	barley	Hordeum vulgare	Hordeum	Poaceae	Gardiner DM, et al 2013	AMXK00000000
Pseudomonas	syringae	NA	syringae	2	2b	NA	PsyBRIP34881	1971	Australia	NA	barley	Hordeum vulgare	Hordeum	Poaceae	Gardiner DM, et al 2013	AMXL00000000
Pseudomonas	syringae	NA	syringae	2	2b	NA	PsyCC1458	NA	USA	NA	shooting star	Dodecantheon pulchellum	Dodecantheon	Primulaceae	Baltrus DA et al., 2014	AVEN00000000
Pseudomonas	syringae	NA	syringae	2	2b	NA	PsyCC1543	NA	France	NA	NA	NA	NA	NA	Baltrus DA et al., 2014	AVEJ00000000
Pseudomonas	syringae	NA	syringae	2	2b	NA	PsyCC440	NA	France	NA	cantaloupe	Cucumis melo	Cucumis	Cucurbitaceae	Baltrus DA et al., 2014	AVEC00000000
Pseudomonas	syringae	NA	syringae	2	2b	NA	PsyFF5	1998	USA	Oklahoma	ornamental pear	Pyrus calleryana	Pyrus	Rosaceae	Sohn,K.H.,2012	ACXZ00000000
Pseudomonas	syringae	NA	syringae	2	2b	Type strain	PsyICMP3023	NA	United Kingdom	NA	lilac	Syringa vulgaris	Syringa	Oleaceae	NA	LJRK00000000
Pseudomonas	syringae	NA	syringae	2	2b	NA	PsyICMP4917	NA	France	NA	lemon	Citrus limon	Citrus	Rutaceae	NA	RBUE00000000
Pseudomonas	syringae	NA	syringae	2	2b	NA	PsyKCTC12500	NA	United Kingdom	NA	lilac	Syringa vulgaris	Syringa	Oleaceae	Jeong, H et al., 2013 (Unpublished data)	AYTM00000000
Pseudomonas	syringae	NA	syringae	2	2b	NA	PsySM	NA	NA	NA	wheat	Triticum aestivum	Triticum	Poaceae	Dudnik,A. and Dudler,R. 2013	APWT01000000
Pseudomonas	syringae	NA	aptata	2	2b	NA	Ptt50252	NA	NA	NA	wheat	Triticum aestivum	Triticum	Poaceae	Baltrus DA et al., 2011	AEAN00000000
Pseudomonas	syringae	NA	aptata	2	2b	NA	PttDSM5022	NA	NA	NA	NA	NA	NA	NA	NA	-
Pseudomonas	syringae	NA	aptata	2	2b	NA	PttICMP11935	NA	France	NA	beet	Beta vulgaris	Beta	Amaranthaceae	NA	RBUF00000000
Pseudomonas	syringae	NA	aptata	2	2b	NA	PttICMP4388	NA	USA	NA	beet	Beta vulgaris	Beta	Amaranthaceae	NA	RBPX00000000
Pseudomonas	syringae	NA	aptata	2	2b	Pathotype strain	PttICMP459	NA	USA	NA	beet	Beta vulgaris	Beta	Amaranthaceae	NA	LJRP00000000
Pseudomonas	syringae	congelans	congelans	2	2c	Type strain	PcoICMP19117	1994	Germany	Paulinenaue	NA	NA	NA	Poaceae	NA	LJQB00000000
Pseudomonas	syringae	NA	syringae	2	2c	NA	Psy642	2007	USA	Blacksburg, VA	horse chestnut	Aesculus hippocastanum	Aesculus	Hippocastanaceae	Clarke CR et al., 2010	ADGB00000000
Pseudomonas	syringae	NA	aceris	2	2d	NA	Pac302273	NA	USA	NA	maple	Acer sp.	Acer	Aceraceae	Baltrus DA et al., 2011	AEAO00000000
Pseudomonas	syringae	NA	aceris	2	2d	NA	PacA10853	NA	USA	NA	maple	Acer sp.	Acer	Aceraceae	Dye DW, et al., 1980.	LGAR00000000
Pseudomonas	syringae	NA	aceris	2	2d	Pathotype strain	PacICMP2802	NA	USA	California	maple	Acer sp.	Acer	Aceraceae	NA	LJPM00000000
Pseudomonas	syringae	NA	apii	2	2d	NA	PapICMP11947	NA	France	NA	celery	Apium graveolens	Apium	Apiaceae	NA	RBUG00000000
Pseudomonas	syringae	NA	avellanae	2	2d	NA	Pav013	1991	Italy	Rome	hazelnut	Corylus avellana	Corylus	Betulaceae	O' Brien H et al., 2012	AKCJ01000000
Pseudomonas	syringae	NA	avellanae	2	2d	NA	Pav037	1993	Italy	Rome	hazelnut	Corylus avellana	Corylus	Betulaceae	O' Brien H et al., 2012	AKCK01000000
Pseudomonas	syringae	NA	coryli	2	2d	Pathotype strain	PcrICMP17001	NA	Italy	NA	hazelnut	Corylus avellana	Corylus	Betulaceae	NA	LJQC00000000
Pseudomonas	syringae	NA	syringae	2	2d	NA	PsB48	NA	USA	South Carolina	peach	Prunus persica	Prunus	Rosaceae	NA	LGKT00000000
Pseudomonas	syringae	NA	solidagae	2	2d	Pathotype strain	PsoICMP16925	NA	Japan	NA	goldenrod	Solidago altissima	Solidago	Asteraceae	NA	LJRH00000000
Pseudomonas	syringae	NA	solidagae	2	2d	NA	PsoICMP16926	NA	Japan	NA	goldenrod	Solidago altissima	Solidago	Asteraceae	NA	RBTH00000000
Pseudomonas	syringae	NA	solidagae	2	2d	NA	PsoICMP16927	NA	Japan	NA	goldenrod	Solidago altissima	Solidago	Asteraceae	NA	RBTG00000000
Pseudomonas	syringae	NA	syringae	2	2d	NA	Psy1212	NA	NA	NA	pea	Pisum sativum	Pisum	Fabaceae	NA	AVCR02000000
Pseudomonas	syringae	NA	syringae	2	2d	NA	PsyB728a	NA	USA	Wisconsin	bean	Phaseolus vulgaris	Phaseolus	Fabaceae	Feil H et al.,2005	CP000075
Pseudomonas	syringae	NA	syringae	2	2d	NA	PsyCC457	NA	France	NA	cantaloupe	Cucumis melo	Cucumis	Cucurbitaceae	Baltrus DA et al., 2014	AVEB00000000
Pseudomonas	syringae	NA	syringae	2	2d	NA	PsyCC94	NA	France	NA	cantaloupe	Cucumis melo	Cucumis	Cucurbitaceae	Baltrus DA et al., 2014	AVEA00000000
Pseudomonas	syringae	NA	syringae	2	2d	NA	PsyHS191	NA	NA	NA	millet	Panicum miliaceum	Panicum	Poaceae	NA	RBNV00000000
Pseudomonas	syringae	NA	syringae	2	2d	NA	PsyICMP3688	NA	New Zealand	NA	almond	Prunus dulcis	Prunus	Rosaceae	NA	RBRX00000000
Pseudomonas	syringae	NA	syringae	2	2d	NA	PsyUB303	2006	France	Lac de Serre-Poncon,	NA	NA	NA	NA	Baltrus DA et al., 2014	AVDZ00000000
Pseudomonas	syringae	NA	syringae	2	2d	NA	PsyUSA011	2007	USA	Wyoming	NA	NA	NA	NA	Baltrus DA et al., 2014	AVDX00000000
Pseudomonas	syringae	NA	aesculi	3	3	NA	Pae0893_23	NA	USA	Indiana	horse chestnut	Aesculus hippocastanum	Aesculus	Hippocastanaceae	Baltrus DA et al., 2011	AEAD00000000
Pseudomonas	syringae	NA	aesculi	3	3	NA	Pae2250	NA	NA	NA	horse chestnut	Aesculus hippocastanum	Aesculus	Hippocastanaceae	Green S et al., 2010	ACXT00000000
Pseudomonas	syringae	NA	aesculi	3	3	NA	Pae3681	NA	India	NA	horse chestnut	Aesculus hippocastanum	Aesculus	Hippocastanaceae	Green S et al., 2010	ACXS00000000
Pseudomonas	syringae	NA	aesculi	3	3	Pathotype strain	PaeICMP8947	NA	India	NA	horse chestnut	Aesculus indica	Aesculus	Hippocastanaceae	NA	LJPN00000000
Pseudomonas	syringae	amygdali	amygdali	3	3	Type strain	PamICMP3918	NA	Greece	NA	almond	Prunus dulcis	Prunus	Rosaceae	NA	LJPQ00000000
Pseudomonas	syringae	NA	broussonetiae	3	3	Pathotype strain	PbrICMP13650	NA	Japan	Aoya, Tottori	mulberry	Broussonetia kazinoki	Broussonetia	Moraceae	NA	LJPV00000000
Pseudomonas	syringae	NA	broussonetiae	3	3	NA	PbrICMP13684	NA	Japan	Aoya, Tottori	mulberry	Broussonetia kazinoki	Broussonetia	Moraceae	NA	RBTE00000000
Pseudomonas	syringae	NA	broussonetiae	3	3	NA	PbrICMP13685	NA	Japan	Tsukaba, Ibaraki	mulberry	Broussonetia kazinoki	Broussonetia	Moraceae	NA	RBSL00000000
Pseudomonas	syringae	NA	ciccaronei	3	3	Pathotype strain	PccICMP5710	NA	Italy	NA	carob	Ceratonia siliqua	Ceratonia	Fabaceae	NA	LJPY00000000
Pseudomonas	syringae	NA	cerasicola	3	3	NA	PceICMP13927	1999	Japan	Miyazaki Prefecture	cherry	Prunus yedoensis	Prunus	Rosaceae	NA	RBSV00000000
Pseudomonas	syringae	NA	cerasicola	3	3	NA	PceICMP13928	1999	Japan	Miyazaki Prefecture	cherry	Prunus yedoensis	Prunus	Rosaceae	NA	RBSU00000000
Pseudomonas	syringae	NA	cerasicola	3	3	Pathotype strain	PceICMP17524	NA	Japan	NA	cherry	Prunus yedoensis	Prunus	Rosaceae	NA	LJQA00000000
Pseudomonas	syringae	NA	cerasicola	3	3	NA	PceICMP17525	NA	Japan	NA	cherry	Prunus yedoensis	Prunus	Rosaceae	NA	RBTI00000000
Pseudomonas	syringae	NA	castaneae	3	3	Pathotype strain	PcsICMP9419	NA	Japan	Makino, Shiga Prefecture	chestnut	Castanea crenata	Castanea	Fagaceae	NA	LJQD00000000
Pseudomonas	syringae	NA	castaneae	3	3	NA	PcsICMP9420	NA	Japan	Makino, Shiga Prefecture	chestnut	Castanea crenata	Castanea	Fagaceae	NA	RBSX00000000
Pseudomonas	syringae	NA	castaneae	3	3	NA	PcsICMP9421	NA	Japan	Makino, Shiga Prefecture	chestnut	Castanea crenata	Castanea	Fagaceae	NA	RBSW00000000
Pseudomonas	syringae	NA	cunninghamiae	3	3	Pathotype strain	PcuICMP11894	NA	China	Jiangxi, Fujian	cypress	Cunninghamia lanceolata	Cunninghamia	Cupressaceae	NA	LJQE00000000
Pseudomonas	syringae	NA	cunninghamiae	3	3	NA	PcuICMP11895	NA	China	Jiangxi, Fujian	cypress	Cunninghamia lanceolata	Cunninghamia	Cupressaceae	NA	RBUO00000000
Pseudomonas	syringae	NA	cunninghamiae	3	3	NA	PcuICMP11897	NA	China	Jiangxi, Fujian	cypress	Cunninghamia lanceolata	Cunninghamia	Cupressaceae	NA	RBUN00000000
Pseudomonas	syringae	NA	cunninghamiae	3	3	NA	PcuICMP11899	NA	China	Jiangxi, Fujian	cypress	Cunninghamia lanceolata	Cunninghamia	Cupressaceae	NA	RBUM00000000
Pseudomonas	syringae	NA	daphniphylli	3	3	Pathotype strain	PdaICMP9757	NA	Japan	Okinawa Prefecture	himeyuzuriha	Daphniphyllum teijsmanni	Daphniphyllum	Daphniphyllaceae	NA	LJQF00000000
Pseudomonas	syringae	NA	dendropanacis	3	3	Pathotype strain	PdeICMP9150	NA	Japan	Okinawa Prefecture	kakuremino	Dendropanax trifidus	Dendropanax	Araliaceae	NA	LJQG00000000
Pseudomonas	syringae	NA	eriobotryae	3	3	NA	PerICMP4316	NA	USA	NA	loquat	Eriobotrya japonica	Eriobotrya	Rosaceae	NA	RBPV00000000
Pseudomonas	syringae	NA	eriobotryae	3	3	Pathotype strain	PerICMP4455	NA	USA	NA	loquat	Eriobotrya japonica	Eriobotrya	Rosaceae	NA	LJQI00000000
Pseudomonas	syringae	NA	eriobotryae	3	3	NA	PerICMP8636	NA	NA	NA	loquat	Eriobotrya japonica	Eriobotrya	Rosaceae	NA	RBOA00000000
Pseudomonas	syringae	ficuserectae	ficuserectae	3	3	Type strain	PfiICMP7848	NA	Japan	Shizuoka	fig	Ficus erecta	Ficus	Moraceae	NA	LJQJ00000000
Pseudomonas	syringae	ficuserectae	ficuserectae	3	3	NA	PfiICMP7849	NA	Japan	Shizuoka Prefecture	fig	Ficus erecta	Ficus	Moraceae	NA	RBSO00000000
Pseudomonas	syringae	ficuserectae	ficuserectae	3	3	NA	PfiICMP7850	NA	Japan	Shizuoka Prefecture	fig	Ficus erecta	Ficus	Moraceae	NA	RBSN00000000
Pseudomonas	syringae	savastanoi	fraxini	3	3	NA	PfrICMP7711	NA	Netherlands	NA	ash	Fraxinus excelsior	Fraxinus	Oleaceae	NA	SAMN03976404
Pseudomonas	syringae	savastanoi	fraxini	3	3	NA	PfrICMP7712	NA	Netherlands	NA	ash	Fraxinus excelsior	Fraxinus	Oleaceae	NA	RBSC00000000
Pseudomonas	syringae	savastanoi	fraxini	3	3	NA	PfrICMP9129	1986	Netherlands	Walcheren	ash	Fraxinus excelsior	Fraxinus	Oleaceae	NA	RBSA00000000
Pseudomonas	syringae	savastanoi	savastanoi	3	3	NA	PfrICMP9132	1987	Netherlands	De Meern	ash	Fraxinus excelsior	Fraxinus	Oleaceae	NA	RBSB00000000
Pseudomonas	syringae	NA	glycinea	3	3	NA	PgyB076	NA	NA	NA	soybean	Glycine max	Glycine	Fabaceae	Qi M et al., 2011	AEGG00000000
Pseudomonas	syringae	NA	glycinea	3	3	NA	PgyBR1	1989	NA	NA	soybean	Glycine max	Glycine	Fabaceae	NA	LGLO00000000
Pseudomonas	syringae	savastanoi	glycinea	3	3	NA	PgyICMP10448	NA	Yugoslavia	NA	soybean	Glycine max	Glycine	Fabaceae	NA	RBOU00000000
Pseudomonas	syringae	savastanoi	glycinea	3	3	NA	PgyICMP10449	NA	Yugoslavia	NA	soybean	Glycine max	Glycine	Fabaceae	NA	RBOT00000000
Pseudomonas	syringae	savastanoi	glycinea	3	3	NA	PgyICMP10450	NA	Yugoslavia	NA	soybean	Glycine max	Glycine	Fabaceae	NA	RBOS00000000
Pseudomonas	syringae	savastanoi	glycinea	3	3	NA	PgyICMP10451	NA	Yugoslavia	NA	soybean	Glycine max	Glycine	Fabaceae	NA	RBOR00000000
Pseudomonas	syringae	savastanoi	glycinea	3	3	NA	PgyICMP10453	NA	NA	NA	NA	NA	NA	NA	NA	-
Pseudomonas	syringae	savastanoi	glycinea	3	3	NA	PgyICMP2185	NA	New Zealand	Massey	soybean	Glycine max	Glycine	Fabaceae	NA	RBRH00000000
Pseudomonas	syringae	savastanoi	glycinea	3	3	Pathotype strain	PgyICMP2189	1972	New Zealand	Lincoln	soybean	Glycine max	Glycine	Fabaceae	NA	LJQL00000000
Pseudomonas	syringae	savastanoi	glycinea	3	3	NA	PgyICMP2400	NA	New Zealand	Blenheim	soybean	Glycine max	Glycine	Fabaceae	NA	RBRU00000000
Pseudomonas	syringae	savastanoi	glycinea	3	3	NA	PgyICMP3482	NA	New Zealand	Gisborne	soybean	Glycine max	Glycine	Fabaceae	NA	RBRR00000000
Pseudomonas	syringae	NA	glycinea	3	3	NA	PgyICMP4180	NA	New Zealand	Waimauku	soybean	Glycine max	Glycine	Fabaceae	NA	RBQN00000000
Pseudomonas	syringae	savastanoi	glycinea	3	3	NA	PgyICMP4181	NA	New Zealand	Ruakura	soybean	Glycine max	Glycine	Fabaceae	NA	RBQY00000000
Pseudomonas	syringae	savastanoi	glycinea	3	3	NA	PgyICMP4182	NA	New Zealand	Ruakura	soybean	Glycine max	Glycine	Fabaceae	NA	RBQX00000000
Pseudomonas	syringae	savastanoi	glycinea	3	3	NA	PgyICMP4324	NA	Zimbabwe	NA	kudzu	Pueraria montana	Pueraria	Fabaceae	NA	RBON00000000
Pseudomonas	syringae	NA	glycinea	3	3	NA	PgyICMP4332	NA	Zimbabwe	NA	kudzu	Pueraria montana	Pueraria	Fabaceae	NA	RBOM00000000
Pseudomonas	syringae	savastanoi	glycinea	3	3	NA	PgyICMP4333	NA	Canada	NA	soybean	Glycine max	Glycine	Fabaceae	NA	RBUW00000000
Pseudomonas	syringae	NA	glycinea	3	3	NA	PgyICMP4402	NA	Zimbabwe	NA	kudzu	Pueraria montana	Pueraria	Fabaceae	NA	RBOL00000000
Pseudomonas	syringae	savastanoi	glycinea	3	3	NA	PgyICMP4630	NA	New Zealand	Helensville	soybean	Glycine max	Glycine	Fabaceae	NA	RBRN00000000
Pseudomonas	syringae	savastanoi	glycinea	3	3	NA	PgyICMP4631	NA	New Zealand	Helensville	soybean	Glycine max	Glycine	Fabaceae	NA	RBRM00000000
Pseudomonas	syringae	savastanoi	glycinea	3	3	NA	PgyICMP4966	NA	France	NA	soybean	Glycine max	Glycine	Fabaceae	NA	RBUD00000000
Pseudomonas	syringae	savastanoi	glycinea	3	3	NA	PgyICMP5027	NA	France	NA	soybean	Glycine max	Glycine	Fabaceae	NA	RBUC00000000
Pseudomonas	syringae	savastanoi	glycinea	3	3	NA	PgyICMP5378	NA	New Zealand	Mt Albert	soybean	Glycine max	Glycine	Fabaceae	NA	RBRF00000000
Pseudomonas	syringae	savastanoi	glycinea	3	3	NA	PgyICMP5559	NA	New Zealand	Rukuhia	soybean	Glycine max	Glycine	Fabaceae	NA	RBQW00000000
Pseudomonas	syringae	savastanoi	glycinea	3	3	NA	PgyICMP5560	NA	New Zealand	Rukuhia	soybean	Glycine max	Glycine	Fabaceae	NA	RBQV00000000
Pseudomonas	syringae	savastanoi	glycinea	3	3	NA	PgyICMP5562	NA	New Zealand	Rukuhia	soybean	Glycine max	Glycine	Fabaceae	NA	RBQU00000000
Pseudomonas	syringae	NA	glycinea	3	3	NA	PgyICMP5928	NA	Yugoslavia	NA	soybean	Glycine max	Glycine	Fabaceae	NA	RBOQ00000000
Pseudomonas	syringae	savastanoi	glycinea	3	3	NA	PgyICMP6372	NA	USA	NA	bean	Phaseolus sp.	Phaseolus	Fabaceae	NA	RBPS00000000
Pseudomonas	syringae	savastanoi	glycinea	3	3	NA	PgyICMP6373	NA	USA	NA	bean	Phaseolus sp.	Phaseolus	Fabaceae	NA	RBPR00000000
Pseudomonas	syringae	savastanoi	glycinea	3	3	NA	PgyICMP7082	NA	Australia	NA	soybean	Glycine max	Glycine	Fabaceae	NA	RBVH00000000
Pseudomonas	syringae	NA	glycinea	3	3	NA	PgyICMP807	NA	NA	NA	soybean	Glycine max	Glycine	Fabaceae	NA	RBNZ00000000
Pseudomonas	syringae	NA	glycinea	3	3	NA	PgyICMP867	NA	USA	NA	soybean	Glycine max	Glycine	Fabaceae	NA	RBPT00000000
Pseudomonas	syringae	savastanoi	glycinea	3	3	NA	PgyICMP9025	NA	Hungary	NA	soybean	Glycine max	Glycine	Fabaceae	NA	RBTV00000000
Pseudomonas	syringae	NA	glycinea	3	3	NA	PgyICMP9026	NA	Hungary	NA	soybean	Glycine max	Glycine	Fabaceae	NA	RBTU00000000
Pseudomonas	syringae	savastanoi	glycinea	3	3	NA	PgyICMP9589	NA	NA	NA	soybean	Glycine max	Glycine	Fabaceae	NA	RBNP00000000
Pseudomonas	syringae	savastanoi	glycinea	3	3	NA	PgyICMP9923	NA	Malawi	NA	soybean	Glycine wightii	Glycine	Fabaceae	NA	RBSF00000000
Pseudomonas	syringae	NA	glycinea	3	3	NA	PgyKN44	1981	Japan	Ibaraki	soybean	Glycine max	Glycine	Fabaceae	NA	LGLP00000000
Pseudomonas	syringae	NA	glycinea	3	3	NA	PgyLN10	1989	NA	NA	soybean	Glycine max	Glycine	Fabaceae	NA	LGLM00000000
Pseudomonas	syringae	NA	glycinea	3	3	NA	PgyR4	NA	NA	NA	soybean	Glycine max	Glycine	Fabaceae	Baltrus DA et al., 2011	ADWY00000000
Pseudomonas	syringae	NA	glycinea	3	3	NA	PgyUnB647	NA	NA	NA	bean	Phaseolus vulgaris	Phaseolus	Fabaceae	NA	LGLL00000000
Pseudomonas	syringae	NA	hibisci	3	3	NA	PhiICMP9314	NA	USA	Florida	hibiscus	Hibiscus rosa-sinensis	Hibiscus	Malvaceae	NA	RBPD00000000
Pseudomonas	syringae	NA	hibisci	3	3	Pathotype strain	PhiICMP9623	NA	USA	NA	hibiscus	Hibiscus rosa-sinensis	Hibiscus	Malvaceae	NA	LJQN00000000
Pseudomonas	syringae	NA	photiniae	3	3	Pathotype strain	PhoICMP7840	NA	Japan	Shizuoka	photinia	Photinia glabra	Photinia	Rosaceae	NA	LJQO00000000
Pseudomonas	syringae	NA	photiniae	3	3	NA	PhoICMP7847	NA	Japan	Shizuoka	photinia	Photinia glabra	Photinia	Rosaceae	NA	RBSP00000000
Pseudomonas	syringae	NA	lachrymans	3	3	NA	Pla107	1975	Japan	Gunma	cucumber	Cucumis sativus	Cucumis	Cucurbitaceae	NA	LGLK00000000
Pseudomonas	syringae	NA	lachrymans	3	3	NA	Pla301315	1975	Japan	Gunma	cucumber	Cucumis sativus	Cucumis	Cucurbitaceae	Baltrus DA et al., 2011	AEAF00000000
Pseudomonas	syringae	NA	lachrymans	3	3	NA	PlaICMP1448	NA	Canada	NA	cucumber	Cucumis sativus	Cucumis	Cucurbitaceae	NA	RBUU00000000
Pseudomonas	syringae	NA	lachrymans	3	3	NA	PlaICMP3402	NA	Hungary	NA	cucumber	Cucumis sativus	Cucumis	Cucurbitaceae	NA	RBTW00000000
Pseudomonas	syringae	NA	lachrymans	3	3	Neopathotype strain	PlaICMP3507	1957	Hungary	NA	cucumber	Cucumis sativus	Cucumis	Cucurbitaceae	NA	LJQP00000000
Pseudomonas	syringae	NA	lachrymans	3	3	NA	PlaICMP826	NA	United Kingdom	NA	cucumber	Cucumis sativus	Cucumis	Cucurbitaceae	NA	RBQI00000000
Pseudomonas	syringae	NA	lachrymans	3	3	NA	PlaN7512	1975	Japan	NA	cucumber	Cucumis sativus	Cucumis	Cucurbitaceae	NA	RBTB00000000
Pseudomonas	syringae	NA	lachrymans	3	3	NA	PlaYM7902	1979	NA	NA	cucumber	Cucumis sativus	Cucumis	Cucurbitaceae	NA	LGLI01000000
Pseudomonas	syringae	NA	lachrymans	3	3	NA	PlaYM8003	1980	NA	NA	cucumber	Cucumis sativus	Cucumis	Cucurbitaceae	NA	RBOH00000000
Pseudomonas	syringae	NA	maculicola	3	3	NA	PmaKN91	1982	NA	NA	radish	Raphanus sativus	Raphanus	Brassicaceae	NA	-
Pseudomonas	syringae	NA	mellea	3	3	Pathotype strain	PmeICMP5711	NA	Japan	NA	tobacco	Nicotiana tabacum	Nicotiana	Solanaceae	NA	LJQS00000000
Pseudomonas	syringae	meliae	meliae	3	3	Type strain	PmeICMP6289	NA	Japan	NA	chinaberry	Melia azedarach	Melia	Meliaceae	NA	-
Pseudomonas	syringae	NA	mellea	3	3	NA	PmeN6801	1968	NA	NA	tobacco	Nicotiana tabacum	Nicotiana	Solanaceae	NA	LGLB00000000
Pseudomonas	syringae	NA	mori	3	3	NA	Pmo301020	1966	Japan	Nagano	mulberry	Morus bombycis	Morus	Moraceae	Baltrus DA et al., 2011	AEAG00000000
Pseudomonas	syringae	NA	mori	3	3	Pathotype strain	PmoICMP4331	NA	Hungary	NA	mulberry	Morus alba	Morus	Moraceae	NA	LJQU00000000
Pseudomonas	syringae	NA	mori	3	3	NA	PmoICMP4468	NA	New Zealand	Alexandra	mulberry	Morus alba	Morus	Moraceae	NA	RBRW00000000
Pseudomonas	syringae	NA	mori	3	3	NA	PmoICMP535	NA	New Zealand	Otago	mulberry	Morus sp.	Morus	Moraceae	NA	RBRD00000000
Pseudomonas	syringae	NA	mori	3	3	NA	PmoICMP6941	NA	Japan	Hikawa-gun, Shimane	mulberry	Morus alba	Morus	Moraceae	NA	RBTD00000000
Pseudomonas	syringae	NA	morsprunorum	3	3	NA	PmpFTRS_U7	1978	Japan	Shiga	apricot	Prunus mume	Prunus	Rosaceae	NA	LGLQ00000000
Pseudomonas	syringae	NA	morsprunorum	3	3	NA	PmpICMP3897	NA	United Kingdom	NA	plum	Prunus domestica	Prunus	Rosaceae	NA	RBQD00000000
Pseudomonas	syringae	NA	morsprunorum	3	3	NA	PmpICMP4983	NA	Greece	NA	cherry	Prunus avium	Prunus	Rosaceae	NA	RBTY00000000
Pseudomonas	syringae	NA	morsprunorum	3	3	NA	PmpICMP568	NA	USA	NA	cherry	Prunus avium	Prunus	Rosaceae	NA	RBPP00000000
Pseudomonas	syringae	NA	myricae	3	3	NA	PmyAZ84488	1984	NA	NA	bayberry	Myrica rubra	Myrica	Myricaceae	NA	LGLA00000000
Pseudomonas	syringae	NA	myricae	3	3	NA	PmyICMP11123	NA	China	Jiangsu	bayberry	Myrica rubra	Myrica	Myricaceae	NA	RBUP00000000
Pseudomonas	syringae	savastanoi	myricae	3	3	NA	PmyICMP11510	NA	China	Zejiang	bayberry	Myrica rubra	Myrica	Myricaceae	NA	RBUL00000000
Pseudomonas	syringae	NA	myricae	3	3	Pathotype strain	PmyICMP7118	NA	Japan	NA	bayberry	Myrica rubra	Myrica	Myricaceae	NA	LJQV00000000
Pseudomonas	syringae	NA	myricae	3	3	NA	PmyICMP7120	NA	Japan	NA	bayberry	Myrica rubra	Myrica	Myricaceae	NA	RBTJ00000000
Pseudomonas	syringae	savastanoi	nerii	3	3	NA	PneICMP13781	NA	Italy	NA	oleander	Nerium oleander	Nerium	Apocynaceae	NA	RBTO00000000
Pseudomonas	syringae	savastanoi	nerii	3	3	NA	PneICMP13786	NA	Italy	NA	oleander	Nerium oleander	Nerium	Apocynaceae	NA	RBTN00000000
Pseudomonas	syringae	savastanoi	nerii	3	3	Pathotype strain	PneICMP16943	NA	Spain	NA	oleander	Nerium oleander	Nerium	Apocynaceae	NA	LJQW00000000
Pseudomonas	syringae	savastanoi	nerii	3	3	NA	PneICMP16944	NA	France	NA	oleander	Nerium oleander	Nerium	Apocynaceae	NA	RBUB00000000
Pseudomonas	syringae	NA	persicae	3	3	NA	PpeICMP3706	NA	United Kingdom	NA	plum	Prunus cerasifera	Prunus	Rosaceae	NA	RBQE00000000
Pseudomonas	syringae	NA	phaseolicola	3	3	NA	Pph1302A	1984	Ethiopia	NA	bean	Phaseolus vulgaris	Phaseolus	Fabaceae	NA	LGKY00000000
Pseudomonas	syringae	NA	phaseolicola	3	3	NA	Pph1448A	1985	Ethiopia	NA	bean	Phaseolus vulgaris	Phaseolus	Fabaceae	Joardar V et al., 2005	CP000058, CP000059, CP000060
Pseudomonas	syringae	NA	phaseolicola	3	3	NA	PphHB10Y	NA	NA	NA	bean	Phaseolus vulgaris	Phaseolus	Fabaceae	NA	LGKX00000000
Pseudomonas	syringae	savastanoi	phaseolicola	3	3	Pathotype strain	PphICMP2740	NA	Canada	NA	bean	Phaseolus vulgaris	Phaseolus	Fabaceae	NA	LJQZ00000000
Pseudomonas	syringae	savastanoi	phaseolicola	3	3	NA	PphICMP5059	NA	USA	NA	mung bean	Vigna radiata	Vigna	Fabaceae	NA	RBPO00000000
Pseudomonas	syringae	savastanoi	phaseolicola	3	3	NA	PphICMP637	NA	New Zealand	Matawhero	bean	Phaseolus vulgaris	Phaseolus	Fabaceae	NA	RBRG00000000
Pseudomonas	syringae	NA	phaseolicola	3	3	NA	PphK4	2012	Canada	Toronto, ON	kudzu	Pueraria lobata	Pueraria	Fabaceae	NA	RBUR00000000
Pseudomonas	syringae	NA	phaseolicola	3	3	NA	PphKN86	1982	Japan	Ibaraki	bean	Phaseolus vulgaris	Phaseolus	Fabaceae	NA	RBTC00000000
Pseudomonas	syringae	NA	phaseolicola	3	3	NA	PphNPS3121	NA	NA	NA	bean	Phaseolus vulgaris	Phaseolus	Fabaceae	NA	LGKW00000000
Pseudomonas	syringae	NA	phaseolicola	3	3	NA	PphY5_2	NA	NA	NA	kudzu	Pueraria lobata	Pueraria	Fabaceae	NA	LGKV00000000
Pseudomonas	syringae	savastanoi	retacarpa	3	3	Pathotype strain	PreICMP16945	NA	Spain	NA	broom bush	Retama sphaerocarpa	Retama	Fabaceae	NA	LJRD00000000
Pseudomonas	syringae	savastanoi	retacarpa	3	3	NA	PreICMP16946	NA	Spain	NA	broom bush	Retama sphaerocarpa	Retama	Fabaceae	NA	RBQM00000000
Pseudomonas	syringae	savastanoi	retacarpa	3	3	NA	PreICMP16947	NA	Spain	NA	broom bush	Retama sphaerocarpa	Retama	Fabaceae	NA	RBNM00000000
Pseudomonas	syringae	NA	rhaphiolepidis	3	3	Pathotype strain	PrhICMP9756	NA	Japan	Okinawa Prefecture	sharinbai	Rhaphiolepis umbellata	Rhaphiolepis	Rosaceae	NA	LJRE00000000
Pseudomonas	syringae	NA	actinidiae	3	3	NA	PsaICMP19198	2011	New Zealand	NA	kiwifruit	Actinidia sp.	Actinidia	Actinidiaceae	NA	RBRZ00000000
Pseudomonas	syringae	NA	actinidiae	3	3	NA	PsaICMP19589	2011	New Zealand	Te Puke	kiwifruit	Actinidia deliciosa	Actinidia	Actinidiaceae	NA	RBQT00000000
Pseudomonas	syringae	NA	sesami	3	3	NA	PseHC_1	NA	NA	NA	seame	Sesamum indicum	Sesamum	Pedaliaceae	NA	LGKS00000000
Pseudomonas	syringae	NA	sesami	3	3	NA	PseICMP3386	NA	India	Vallabhnagar	seame	Sesamum indicum	Sesamum	Pedaliaceae	NA	RBTR00000000
Pseudomonas	syringae	NA	sesami	3	3	NA	PseICMP4995	NA	India	NA	seame	Sesamum indicum	Sesamum	Pedaliaceae	NA	RBTS00000000
Pseudomonas	syringae	NA	sesami	3	3	NA	PseICMP7459	NA	Brazil	NA	seame	Sesamum indicum	Sesamum	Pedaliaceae	NA	RBUZ00000000
Pseudomonas	syringae	NA	sesami	3	3	Pathotype strain	PseICMP763	NA	Yugoslavia	NA	seame	Sesamum indicum	Sesamum	Pedaliaceae	NA	LJRG00000000
Pseudomonas	syringae	NA	savastanoi	3	3	NA	Psv0485_9	NA	NA	NA	oleander	Nerium oleander	Nerium	Apocynaceae	NA	RBNY00000000
Pseudomonas	syringae	NA	savastanoi	3	3	NA	Psv3335	NA	NA	NA	olive	Olea europaea	Olea	Oleaceae	RodrÃ­guez-Palenzuela P et al. 2010	ADMI00000000
Pseudomonas	syringae	NA	savastanoi	3	3	NA	Psv4352	NA	NA	Yugoslavia	olive	Olea europaea	Olea	Oleaceae	NA	LGKR00000000
Pseudomonas	syringae	savastanoi	savastanoi	3	3	NA	PsvICMP13519	NA	NA	NA	olive	Olea europaea	Olea	Oleaceae	NA	RBNW00000000
Pseudomonas	syringae	savastanoi	savastanoi	3	3	NA	PsvICMP1411	NA	USA	California	olive	Olea europaea	Olea	Oleaceae	NA	RBPF00000000
Pseudomonas	syringae	savastanoi	savastanoi	3	3	Pathotype strain	PsvICMP4352	NA	Yugoslavia	NA	olive	Olea europaea	Olea	Oleaceae	NA	LJRJ00000000
Pseudomonas	syringae	NA	tabaci	3	3	NA	Psy0440	2016	Brazil	Minas Gerais	coffee	Coffea arabica	Coffea	Rubiaceae	NA	QPCR00000000
Pseudomonas	syringae	NA	garcae	3	3	NA	Psy0467	2016	Brazil	Minas Gerais	coffee	Coffea arabica	Coffea	Rubiaceae	NA	QPDO00000000
Pseudomonas	syringae	NA	tabaci	3	3	NA	Psy0469	2016	Brazil	Minas Gerais	coffee	Coffea arabica	Coffea	Rubiaceae	NA	QPDP00000000
Pseudomonas	syringae	NA	tabaci	3	3	NA	Psy0478	2016	Brazil	Minas Gerais	coffee	Coffea arabica	Coffea	Rubiaceae	NA	QPDX00000000
Pseudomonas	syringae	NA	tabaci	3	3	NA	Psy0479	2016	Brazil	Minas Gerais	coffee	Coffea arabica	Coffea	Rubiaceae	NA	QPDY00000000
Pseudomonas	syringae	NA	tabaci	3	3	NA	Psy0480	2016	Brazil	Minas Gerais	coffee	Coffea arabica	Coffea	Rubiaceae	NA	QPDZ00000000
Pseudomonas	syringae	NA	phaseolicola	3	3	NA	Psy0506	2013	Canada	Alberta	bean	Phaseolus vulgaris	Phaseolus	Fabaceae	NA	QPAM00000000
Pseudomonas	syringae	NA	phaseolicola	3	3	NA	Psy0507	2013	Canada	Alberta	bean	Phaseolus vulgaris	Phaseolus	Fabaceae	NA	QPAN00000000
Pseudomonas	syringae	NA	phaseolicola	3	3	NA	Psy0508	2013	Canada	Alberta	bean	Phaseolus vulgaris	Phaseolus	Fabaceae	NA	QPAO00000000
Pseudomonas	syringae	NA	phaseolicola	3	3	NA	Psy0509	2013	Canada	Alberta	bean	Phaseolus vulgaris	Phaseolus	Fabaceae	NA	QPAP00000000
Pseudomonas	syringae	NA	phaseolicola	3	3	NA	Psy0510	2013	Canada	Alberta	bean	Phaseolus vulgaris	Phaseolus	Fabaceae	NA	QPAQ00000000
Pseudomonas	syringae	NA	phaseolicola	3	3	NA	Psy0511	2013	Canada	Alberta	bean	Phaseolus vulgaris	Phaseolus	Fabaceae	NA	QPAR00000000
Pseudomonas	syringae	NA	phaseolicola	3	3	NA	Psy0512	2013	Canada	Alberta	bean	Phaseolus vulgaris	Phaseolus	Fabaceae	NA	QPAS00000000
Pseudomonas	syringae	NA	phaseolicola	3	3	NA	Psy0513	2013	Canada	Alberta	bean	Phaseolus vulgaris	Phaseolus	Fabaceae	NA	QPAT00000000
Pseudomonas	syringae	NA	phaseolicola	3	3	NA	Psy0514	2013	Canada	Alberta	bean	Phaseolus vulgaris	Phaseolus	Fabaceae	NA	QPAU00000000
Pseudomonas	syringae	NA	phaseolicola	3	3	NA	Psy0515	2013	Canada	Alberta	bean	Phaseolus vulgaris	Phaseolus	Fabaceae	NA	QPAV00000000
Pseudomonas	syringae	NA	phaseolicola	3	3	NA	Psy0516	2013	Canada	Alberta	bean	Phaseolus vulgaris	Phaseolus	Fabaceae	NA	QPAW00000000
Pseudomonas	syringae	NA	phaseolicola	3	3	NA	Psy0517	2013	Canada	Alberta	bean	Phaseolus vulgaris	Phaseolus	Fabaceae	NA	QPAX00000000
Pseudomonas	syringae	NA	phaseolicola	3	3	NA	Psy0518	2013	Canada	Alberta	bean	Phaseolus vulgaris	Phaseolus	Fabaceae	NA	QPAY00000000
Pseudomonas	syringae	NA	phaseolicola	3	3	NA	Psy0519	2013	Canada	Alberta	bean	Phaseolus vulgaris	Phaseolus	Fabaceae	NA	QPAZ00000000
Pseudomonas	syringae	NA	phaseolicola	3	3	NA	Psy0520	2013	Canada	Alberta	bean	Phaseolus vulgaris	Phaseolus	Fabaceae	NA	QPBA00000000
Pseudomonas	syringae	NA	phaseolicola	3	3	NA	Psy0521	2013	Canada	Alberta	bean	Phaseolus vulgaris	Phaseolus	Fabaceae	NA	QPBB00000000
Pseudomonas	syringae	NA	phaseolicola	3	3	NA	Psy0522	2013	Canada	Alberta	bean	Phaseolus vulgaris	Phaseolus	Fabaceae	NA	QPBC00000000
Pseudomonas	syringae	NA	phaseolicola	3	3	NA	Psy0523	2013	Canada	Alberta	bean	Phaseolus vulgaris	Phaseolus	Fabaceae	NA	QPBD00000000
Pseudomonas	syringae	NA	phaseolicola	3	3	NA	Psy0524	2013	Canada	Alberta	bean	Phaseolus vulgaris	Phaseolus	Fabaceae	NA	QPBE00000000
Pseudomonas	syringae	NA	phaseolicola	3	3	NA	Psy0525	2013	Canada	Alberta	bean	Phaseolus vulgaris	Phaseolus	Fabaceae	NA	QPBF00000000
Pseudomonas	syringae	NA	phaseolicola	3	3	NA	Psy0526	2013	Canada	Alberta	bean	Phaseolus vulgaris	Phaseolus	Fabaceae	NA	QPBG00000000
Pseudomonas	syringae	NA	phaseolicola	3	3	NA	Psy0527	2013	Canada	Alberta	bean	Phaseolus vulgaris	Phaseolus	Fabaceae	NA	QPBH00000000
Pseudomonas	syringae	NA	phaseolicola	3	3	NA	Psy0528	2013	Canada	Alberta	bean	Phaseolus vulgaris	Phaseolus	Fabaceae	NA	QPBI00000000
Pseudomonas	syringae	NA	phaseolicola	3	3	NA	Psy0530	2013	Canada	Alberta	bean	Phaseolus vulgaris	Phaseolus	Fabaceae	NA	QPBK00000000
Pseudomonas	syringae	NA	phaseolicola	3	3	NA	Psy0531	2013	Canada	Alberta	bean	Phaseolus vulgaris	Phaseolus	Fabaceae	NA	QPBL00000000
Pseudomonas	syringae	NA	phaseolicola	3	3	NA	Psy0532	2013	Canada	Alberta	bean	Phaseolus vulgaris	Phaseolus	Fabaceae	NA	QPBM00000000
Pseudomonas	syringae	NA	phaseolicola	3	3	NA	Psy0533	2013	Canada	Alberta	bean	Phaseolus vulgaris	Phaseolus	Fabaceae	NA	QPBN00000000
Pseudomonas	syringae	NA	phaseolicola	3	3	NA	Psy0535	2013	Canada	Alberta	bean	Phaseolus vulgaris	Phaseolus	Fabaceae	NA	QPBO00000000
Pseudomonas	syringae	NA	syringae	3	3	NA	PsyICMP4602	NA	NA	NA	NA	NA	NA	NA	NA	-
Pseudomonas	syringae	NA	syringae	3	3	NA	PsyICMP4909	NA	NA	NA	NA	NA	NA	NA	NA	-
Pseudomonas	syringae	NA	tabaci	3	3	NA	Pta11528	NA	NA	NA	tobacco	Nicotiana tabacum	Nicotiana	Solanaceae	Studholme DJ., 2009	ACHU00000000
Pseudomonas	syringae	NA	tabaci	3	3	NA	Pta6605	NA	Japan	NA	tobacco	Nicotiana tabacum	Nicotiana	Solanaceae	Yamamoto et al., 2011	AJXI00000000
Pseudomonas	syringae	NA	tabaci	3	3	NA	Pta6606	1967	Japan	Akita	tobacco	Nicotiana tabacum	Nicotiana	Solanaceae	NA	2505313054
Pseudomonas	syringae	NA	tabaci	3	3	NA	PtaICMP2812	NA	Malawi	NA	tobacco	Nicotiana tabacum	Nicotiana	Solanaceae	NA	RBSE00000000
Pseudomonas	syringae	NA	tabaci	3	3	Pathotype strain	PtaICMP2835	NA	Hungary	NA	tobacco	Nicotiana tabacum	Nicotiana	Solanaceae	NA	LJRL00000000
Pseudomonas	syringae	NA	tabaci	3	3	NA	PtaICMP2851	NA	NA	NA	tobacco	Nicotiana tabacum	Nicotiana	Solanaceae	NA	RBNX00000000
Pseudomonas	syringae	NA	tabaci	3	3	NA	PtaICMP4525	NA	Brazil	NA	bean	Phaseolus vulgaris	Phaseolus	Fabaceae	NA	RBVA00000000
Pseudomonas	syringae	NA	ulmi	3	3	Pathotype strain	PumICMP3962	NA	Yugoslavia	NA	elm	Ulmus sp.	Ulmus	Ulmaceae	NA	LJRQ00000000
Pseudomonas	syringae	NA	ulmi	3	3	NA	PumICMP5931	NA	New Zealand	Earnscleugh	elm	Ulmus pumila	Ulmus	Ulmaceae	NA	RBRS00000000
Pseudomonas	viridiflava	NA	NA	3	3	NA	PvrICMP11296	NA	New Zealand	Kumeu	kiwifruit	Actinidia deliciosa	Actinidia	Actinidiaceae	NA	RBRK00000000
Pseudomonas	viridiflava	NA	NA	3	3	NA	PvrICMP3272	1975	New Zealand	Riverhead	kiwifruit	Actinidia deliciosa	Actinidia	Actinidiaceae	NA	RBQZ00000000
Pseudomonas	syringae	NA	atropurpurea	4	4	NA	ParICMP4328	NA	Japan	NA	ryegrass	Lolium multiflorum	Lolium	Poaceae	NA	RBTK00000000
Pseudomonas	syringae	NA	atropurpurea	4	4	NA	ParICMP4451	NA	Canada	NA	bromegrass	Bromus sp.	Bromus	Poaceae	NA	RBUX00000000
Pseudomonas	syringae	NA	atropurpurea	4	4	Pathotype strain	ParICMP4457	NA	Japan	NA	ryegrass	Lolium multiflorum	Lolium	Poaceae	NA	LJPS00000000
Pseudomonas	syringae	NA	atropurpurea	4	4	NA	ParICMP4460	NA	United Kingdom	NA	oatgrass	Arrhenatherum elatius	Arrhenatherum	Poaceae	NA	RBQJ00000000
Pseudomonas	syringae	NA	coronafaciens	4	4	NA	Pcn3113	1958	United Kingdom	NA	oat	Avena sativa	Avena	Poaceae	NA	RBUJ00000000
Pseudomonas	syringae	NA	coronafaciens	4	4	NA	PcnICMP10052	NA	USA	California	oat	Avena sativa	Avena	Poaceae	NA	RBPK00000000
Pseudomonas	syringae	NA	coronafaciens	4	4	NA	PcnICMP4329	NA	Kenya	NA	oat	Avena sativa	Avena	Poaceae	NA	RBSJ00000000
Pseudomonas	syringae	NA	coronafaciens	4	4	NA	PcnKN221	NA	NA	NA	NA	NA	NA	NA	NA	-
Pseudomonas	syringae	NA	garcae	4	4	NA	PgcICMP3649	NA	Kenya	NA	coffee	Coffea arabica	Coffea	Rubiaceae	NA	RBSI00000000
Pseudomonas	syringae	NA	garcae	4	4	Pathotype strain	PgcICMP4323	NA	Brazil	NA	coffee	Coffea arabica	Coffea	Rubiaceae	NA	LJQK00000000
Pseudomonas	syringae	NA	garcae	4	4	NA	PgcICMP4466	NA	Brazil	NA	coffee	Coffea arabica	Coffea	Rubiaceae	NA	RBVB00000000
Pseudomonas	syringae	NA	garcae	4	4	NA	PgcICMP5019	NA	Kenya	NA	coffee	Coffea arabica	Coffea	Rubiaceae	NA	RBSH00000000
Pseudomonas	syringae	NA	garcae	4	4	NA	PgcNCPPB2708	1975	Kenya	NA	coffee	Coffea arabica	Coffea	Rubiaceae	NA	RBSK00000000
Pseudomonas	syringae	NA	oryzae	4	4	NA	Por36_1	1983	NA	NA	rice	Oryza sativa	Oryza	Poaceae	NA	LGKZ00000000
Pseudomonas	syringae	NA	oryzae	4	4	NA	PorI_6	1991	NA	NA	rice	Oryza sativa	Oryza	Poaceae	NA	RBOG00000000
Pseudomonas	syringae	NA	oryzae	4	4	Pathotype strain	PorICMP9088	NA	Japan	Kanagi-machi, Aomori Pref.	rice	Oryza sativa	Oryza	Poaceae	NA	LJQX00000000
Pseudomonas	syringae	NA	oryzae	4	4	NA	PorICMP9091	NA	Japan	Kanita-machi, Amori Pref.	rice	Oryza sativa	Oryza	Poaceae	NA	RBTA00000000
Pseudomonas	syringae	NA	oryzae	4	4	NA	PorICMP9093	NA	Japan	Kanita-machi, Aomori Pref.	rice	Oryza sativa	Oryza	Poaceae	NA	RBSZ00000000
Pseudomonas	syringae	NA	oryzae	4	4	NA	PorICMP9095	NA	Japan	Kanita-machi, Aomori Pref.	rice	Oryza sativa	Oryza	Poaceae	NA	RBSY00000000
Pseudomonas	syringae	NA	porri	4	4	NA	PpoICMP16803	NA	Australia	Murray Bridge, S.A.	leek	Allium ampeloprasum	Allium	Amaryllidaceae	NA	RBVD00000000
Pseudomonas	syringae	NA	porri	4	4	NA	PpoICMP16805	NA	Australia	Langhorne Creek, SA	leek	Allium ampeloprasum	Allium	Amaryllidaceae	NA	RBVE00000000
Pseudomonas	syringae	NA	porri	4	4	NA	PpoICMP8960	NA	France	NA	leek	Allium porrum	Allium	Amaryllidaceae	NA	RBUH00000000
Pseudomonas	syringae	NA	porri	4	4	Pathotype strain	PpoICMP8961	NA	France	NA	leek	Allium porrum	Allium	Amaryllidaceae	NA	LJRA00000000
Pseudomonas	syringae	NA	striafaciens	4	4	NA	PsfICMP4418	NA	Zimbabwe	NA	oat	Avena sativa	Avena	Poaceae	NA	RBOP00000000
Pseudomonas	syringae	NA	garcae	4	4	NA	Psg150	2016	Brazil	Minas Gerais	coffee	Coffea arabica	Coffea	Rubiaceae	NA	QPCJ00000000
Pseudomonas	syringae	NA	garcae	4	4	NA	Psy0432	2016	Brazil	Minas Gerais	coffee	Coffea arabica	Coffea	Rubiaceae	NA	QPCK00000000
Pseudomonas	syringae	NA	garcae	4	4	NA	Psy0433	2016	Brazil	Minas Gerais	coffee	Coffea arabica	Coffea	Rubiaceae	NA	QPCL00000000
Pseudomonas	syringae	NA	garcae	4	4	NA	Psy0434	2016	Brazil	Minas Gerais	coffee	Coffea arabica	Coffea	Rubiaceae	NA	QPCM00000000
Pseudomonas	syringae	NA	garcae	4	4	NA	Psy0435	2016	Brazil	Minas Gerais	coffee	Coffea arabica	Coffea	Rubiaceae	NA	QPCN00000000
Pseudomonas	syringae	NA	garcae	4	4	NA	Psy0436	2016	Brazil	Minas Gerais	coffee	Coffea arabica	Coffea	Rubiaceae	NA	QPCO00000000
Pseudomonas	syringae	NA	garcae	4	4	NA	Psy0437	2016	Brazil	Minas Gerais	coffee	Coffea arabica	Coffea	Rubiaceae	NA	QPCP00000000
Pseudomonas	syringae	NA	garcae	4	4	NA	Psy0438	2016	Brazil	Minas Gerais	coffee	Coffea arabica	Coffea	Rubiaceae	NA	QPCQ00000000
Pseudomonas	syringae	NA	garcae	4	4	NA	Psy0441	2016	Brazil	Minas Gerais	coffee	Coffea arabica	Coffea	Rubiaceae	NA	QPCS00000000
Pseudomonas	syringae	NA	garcae	4	4	NA	Psy0442	2016	Brazil	Minas Gerais	coffee	Coffea arabica	Coffea	Rubiaceae	NA	QPCT00000000
Pseudomonas	syringae	NA	garcae	4	4	NA	Psy0443	2016	Brazil	Minas Gerais	coffee	Coffea arabica	Coffea	Rubiaceae	NA	QPCU00000000
Pseudomonas	syringae	NA	garcae	4	4	NA	Psy0445	2016	Brazil	Minas Gerais	coffee	Coffea arabica	Coffea	Rubiaceae	NA	QPCV00000000
Pseudomonas	syringae	NA	garcae	4	4	NA	Psy0446	2016	Brazil	Minas Gerais	coffee	Coffea arabica	Coffea	Rubiaceae	NA	QPCW00000000
Pseudomonas	syringae	NA	garcae	4	4	NA	Psy0447	2016	Brazil	Minas Gerais	coffee	Coffea arabica	Coffea	Rubiaceae	NA	QPCX00000000
Pseudomonas	syringae	NA	garcae	4	4	NA	Psy0448	2016	Brazil	Minas Gerais	coffee	Coffea arabica	Coffea	Rubiaceae	NA	QPCY00000000
Pseudomonas	syringae	NA	garcae	4	4	NA	Psy0450	2016	Brazil	Minas Gerais	coffee	Coffea arabica	Coffea	Rubiaceae	NA	QPCZ00000000
Pseudomonas	syringae	NA	garcae	4	4	NA	Psy0451	2016	Brazil	Minas Gerais	coffee	Coffea arabica	Coffea	Rubiaceae	NA	QPDA00000000
Pseudomonas	syringae	NA	garcae	4	4	NA	Psy0454	2016	Brazil	Minas Gerais	coffee	Coffea arabica	Coffea	Rubiaceae	NA	QPDB00000000
Pseudomonas	syringae	NA	garcae	4	4	NA	Psy0455	2016	Brazil	Minas Gerais	coffee	Coffea arabica	Coffea	Rubiaceae	NA	QPDC00000000
Pseudomonas	syringae	NA	garcae	4	4	NA	Psy0456	2016	Brazil	Minas Gerais	coffee	Coffea arabica	Coffea	Rubiaceae	NA	QPDD00000000
Pseudomonas	syringae	NA	garcae	4	4	NA	Psy0457	2016	Brazil	Minas Gerais	coffee	Coffea arabica	Coffea	Rubiaceae	NA	QPDE00000000
Pseudomonas	syringae	NA	garcae	4	4	NA	Psy0458	2016	Brazil	Minas Gerais	coffee	Coffea arabica	Coffea	Rubiaceae	NA	QPDF00000000
Pseudomonas	syringae	NA	garcae	4	4	NA	Psy0459	2016	Brazil	Minas Gerais	coffee	Coffea arabica	Coffea	Rubiaceae	NA	QPDG00000000
Pseudomonas	syringae	NA	garcae	4	4	NA	Psy0460	2016	Brazil	Minas Gerais	coffee	Coffea arabica	Coffea	Rubiaceae	NA	QPDH00000000
Pseudomonas	syringae	NA	garcae	4	4	NA	Psy0461	2016	Brazil	Minas Gerais	coffee	Coffea arabica	Coffea	Rubiaceae	NA	QPDI00000000
Pseudomonas	syringae	NA	garcae	4	4	NA	Psy0462	2016	Brazil	Minas Gerais	coffee	Coffea arabica	Coffea	Rubiaceae	NA	QPDJ00000000
Pseudomonas	syringae	NA	garcae	4	4	NA	Psy0463	2016	Brazil	Minas Gerais	coffee	Coffea arabica	Coffea	Rubiaceae	NA	QPDK00000000
Pseudomonas	syringae	NA	garcae	4	4	NA	Psy0464	2016	Brazil	Minas Gerais	coffee	Coffea arabica	Coffea	Rubiaceae	NA	QPDL00000000
Pseudomonas	syringae	NA	garcae	4	4	NA	Psy0465	2016	Brazil	Minas Gerais	coffee	Coffea arabica	Coffea	Rubiaceae	NA	QPDM00000000
Pseudomonas	syringae	NA	garcae	4	4	NA	Psy0466	2016	Brazil	Minas Gerais	coffee	Coffea arabica	Coffea	Rubiaceae	NA	QPDN00000000
Pseudomonas	syringae	NA	garcae	4	4	NA	Psy0470	2016	Brazil	Minas Gerais	coffee	Coffea arabica	Coffea	Rubiaceae	NA	QPDQ00000000
Pseudomonas	syringae	NA	garcae	4	4	NA	Psy0471	2016	Brazil	Minas Gerais	coffee	Coffea arabica	Coffea	Rubiaceae	NA	QPDR00000000
Pseudomonas	syringae	NA	garcae	4	4	NA	Psy0475	2016	Brazil	Minas Gerais	coffee	Coffea arabica	Coffea	Rubiaceae	NA	QPDU00000000
Pseudomonas	syringae	NA	garcae	4	4	NA	Psy0476	2016	Brazil	Minas Gerais	coffee	Coffea arabica	Coffea	Rubiaceae	NA	QPDV00000000
Pseudomonas	syringae	NA	garcae	4	4	NA	Psy0477	2016	Brazil	Minas Gerais	coffee	Coffea arabica	Coffea	Rubiaceae	NA	QPDW00000000
Pseudomonas	syringae	NA	garcae	4	4	NA	Psy0483	2016	Brazil	Minas Gerais	coffee	Coffea arabica	Coffea	Rubiaceae	NA	QPEC00000000
Pseudomonas	syringae	NA	garcae	4	4	NA	Psy0484	2016	Brazil	Minas Gerais	coffee	Coffea arabica	Coffea	Rubiaceae	NA	QPED00000000
Pseudomonas	syringae	NA	garcae	4	4	NA	Psy0485	2016	Brazil	Minas Gerais	coffee	Coffea arabica	Coffea	Rubiaceae	NA	QPEE00000000
Pseudomonas	syringae	NA	garcae	4	4	NA	Psy0486	2016	Brazil	Minas Gerais	coffee	Coffea arabica	Coffea	Rubiaceae	NA	QPEF00000000
Pseudomonas	syringae	NA	garcae	4	4	NA	Psy0487	2016	Brazil	Minas Gerais	coffee	Coffea arabica	Coffea	Rubiaceae	NA	QPEG00000000
Pseudomonas	syringae	NA	garcae	4	4	NA	Psy0488	2016	Brazil	Minas Gerais	coffee	Coffea arabica	Coffea	Rubiaceae	NA	QPEH00000000
Pseudomonas	syringae	NA	garcae	4	4	NA	Psy0489	2016	Brazil	Minas Gerais	coffee	Coffea arabica	Coffea	Rubiaceae	NA	QPEI00000000
Pseudomonas	syringae	NA	syringae	4	4	NA	PsyCC1513	NA	France	NA	hutchinsia	Hutchinsia alpina	Hutchinsia	Brassicaceae	Baltrus DA et al., 2014	AVEL00000000
Pseudomonas	syringae	NA	syringae	4	4	NA	PsyCC1629	NA	USA	NA	oat	Avena sativa	Avena	Poaceae	Baltrus DA et al., 2014	AVEE00000000
Pseudomonas	syringae	NA	tremae	4	4	Type strain	PtrICMP9151	NA	Japan	Okinawa Prefecture	urajiroenoki	Trema orientalis	Trema	Cannabaceae	NA	LJRO00000000
Pseudomonas	syringae	NA	zizaniae	4	4	Pathotype strain	PziICMP8921	NA	USA	Minnesota	wild rice	Zizania aquatica	Zizania	Poaceae	NA	LJRT00000000
Pseudomonas	syringae	NA	zizaniae	4	4	NA	PziICMP8941	NA	USA	Minnesota	wild rice	Zizania aquatica	Zizania	Poaceae	NA	RBOZ00000000
Pseudomonas	syringae	NA	zizaniae	4	4	NA	PziICMP8944	NA	USA	Minnesota	wild rice	Zizania aquatica	Zizania	Poaceae	NA	RBOY00000000
Pseudomonas	syringae	NA	zizaniae	4	4	NA	PziICMP8959	NA	USA	Benewah County, Idaho	wild rice	Zizania aquatica	Zizania	Poaceae	NA	RBPM00000000
Pseudomonas	syringae	NA	alisalensis	5	5	NA	PalBS91	NA	NA	NA	NA	NA	NA	NA	NA	2516653056
Pseudomonas	syringae	NA	alisalensis	5	5	Pathotype strain	PalICMP15200	NA	USA	California	raab	Brassica rapa	Brassica	Brassicaceae	NA	LJPP00000000
Pseudomonas	syringae	NA	alisalensis	5	5	NA	PalICMP15201	NA	USA	California	raab	Brassica rapa	Brassica	Brassicaceae	NA	RBPH00000000
Pseudomonas	syringae	NA	alisalensis	5	5	NA	PalICMP15203	NA	USA	California	cauliflower	Brassica oleracea	Brassica	Brassicaceae	NA	RBPJ00000000
Pseudomonas	syringae	NA	alisalensis	5	5	NA	PalICMP15205	NA	USA	California	cauliflower	Brassica oleracea	Brassica	Brassicaceae	NA	RBPI00000000
Pseudomonas	syringae	NA	alisalensis	5	5	NA	PalPSa1_3	NA	NA	NA	NA	NA	NA	NA	NA	2512564082
Pseudomonas	syringae	cannabina	alisalensis	5	5	NA	PalT3C	NA	USA	South Carolina	turnip	Brassica rapa	Brassica	Brassicaceae	Sarris PF et al., 2013	2516653057
Pseudomonas	syringae	cannabina	cannabina	5	5	NA	PcbICMP2821	NA	Yugoslavia	NA	hemp	Cannabis sativa	Cannabis	Cannabaceae	NA	RBOW00000000
Pseudomonas	syringae	cannabina	cannabina	5	5	Pathotype strain	PcbICMP2823	NA	Hungary	NA	hemp	Cannabis sativa	Cannabis	Cannabaceae	NA	LJPX00000000
Pseudomonas	syringae	NA	coriandricola	5	5	NA	PcdICMP12341	NA	Yugoslavia	NA	cilantro	Coriandrum sativum	Coriandrum	Apiaceae	NA	RBOV00000000
Pseudomonas	syringae	NA	coriandricola	5	5	Pathotype strain	PcdICMP12471	NA	Germany	Eckendorf	cilantro	Coriandrum sativum	Coriandrum	Apiaceae	NA	LJPZ00000000
Pseudomonas	syringae	NA	cilantro	5	5	NA	Pci0788_9	1988	USA	California	cilantro	Coriandrum sativum	Coriandrum	Apiaceae	NA	LGLN00000000
Pseudomonas	syringae	NA	maculicola	5	5	NA	PmaES4326	1965	NA	NA	radish	Raphanus sativus	Raphanus	Brassicaceae	Baltrus DA et al., 2011	AEAK00000000
Pseudomonas	syringae	NA	maculicola	5	5	NA	PmaYM7930	1979	NA	NA	radish	Raphanus sativus	Raphanus	Brassicaceae	NA	LGLD00000000
Pseudomonas	syringae	NA	philadelphi	5	5	NA	PpdICMP8902	NA	United Kingdom	Hadnall, Shropshire	mock orange	Philadelphus coronarius	Philadelphus	Hydrangeaceae	NA	RBQB00000000
Pseudomonas	syringae	caricapapayae	caricapapayae	6	6	NA	PcaICMP2854	NA	Brazil	NA	papaya	Carica papaya	Carica	Caricaceae	NA	RBVC00000000
Pseudomonas	syringae	caricapapayae	caricapapayae	6	6	Type strain	PcaICMP2855	NA	Brazil	NA	papaya	Carica papaya	Carica	Caricaceae	NA	LJPW00000000
Pseudomonas	syringae	caricapapayae	caricapapayae	6	6	NA	PcaICMP4086	NA	NA	NA	papaya	Carica papaya	Carica	Caricaceae	NA	RBOC00000000
Pseudomonas	syringae	caricapapayae	caricapapayae	6	6	NA	PcaICMP7496	NA	Brazil	Porto Alegre, Rio Grande do Sul	papaya	Carica papaya	Carica	Caricaceae	NA	RBUY00000000
Pseudomonas	syringae	NA	helianthi	6	6	NA	PheICMP3263	NA	Canada	Alberta	sunflower	Helianthus annuus	Helianthus	Asteraceae	NA	RBUT00000000
Pseudomonas	syringae	NA	helianthi	6	6	NA	PheICMP3549	NA	New Zealand	Hastings	sunflower	Helianthus annuus	Helianthus	Asteraceae	NA	RBRP00000000
Pseudomonas	syringae	NA	helianthi	6	6	Pathotype strain	PheICMP4531	NA	Mexico	NA	sunflower	Helianthus annuus	Helianthus	Asteraceae	NA	LJQM00000000
Pseudomonas	syringae	NA	tagetis	6	6	NA	PtgICMP11161	NA	Australia	NA	marigold	Tagetes erecta	Tagetes	Asteraceae	NA	RBVG00000000
Pseudomonas	syringae	NA	tagetis	6	6	Pathotype strain	PtgICMP4091	NA	Zimbabwe	NA	marigold	Tagetes erecta	Tagetes	Asteraceae	NA	LJRM00000000
Pseudomonas	syringae	NA	tagetis	6	6	NA	PtgICMP6369	NA	Australia	NA	marigold	Tagetes erecta	Tagetes	Asteraceae	NA	RBVF00000000
Pseudomonas	syringae	NA	primulae	7	7	Pathotype strain	PprICMP3956	NA	USA	NA	polyanthus	Primula sp.	Primula	Primulaceae	NA	LJRC00000000
Pseudomonas	syringae	NA	ribicola	7	7	Pathotype strain	PriICMP3882	NA	USA	Wyoming	currant	Ribes aureum	Ribes	Grossulariaceae	NA	LJRF00000000
Pseudomonas	viridiflava	NA	NA	7	7	NA	PvrICMP19473	2010	Iran	Sari, Mazandaran	mallow	Malvaviscus penduliflorus	Malvaviscus	Malvaceae	NA	RBTP00000000
Pseudomonas	viridiflava	NA	NA	7	7	Type strain	PvrICMP2848	NA	Switzerland	NA	bean	Phaseolus vulgaris	Phaseolus	Fabaceae	NA	LJRS00000000
Pseudomonas	syringae	NA	syringae	9	9a	NA	PsyCC1417	NA	USA	Montana	NA	NA	NA	NA	Baltrus DA et al., 2014	AVEO00000000
Pseudomonas	syringae	NA	syringae	9	9a	NA	PsyCC1524	NA	NA	NA	NA	NA	NA	NA	Baltrus DA et al., 2014	AVEK00000000
Pseudomonas	syringae	NA	syringae	10	10a	NA	PsyCC1583	NA	France	NA	NA	NA	NA	NA	Baltrus DA et al., 2014	AVEF00000000
Pseudomonas	syringae	NA	syringae	10	10b	NA	PsyCC1466	NA	USA	NA	shooting star	Dodecantheon pulchellum	Dodecantheon	Primulaceae	Baltrus DA et al., 2014	AVEM00000000
Pseudomonas	syringae	NA	syringae	10	10b	NA	PsyCC1557	NA	France	NA	NA	NA	NA	NA	Baltrus DA et al., 2014	AVEH00000000
Pseudomonas	syringae	NA	cichorii	11	11	NA	Pc136	2016	Brazil	Minas Gerais	coffee	Coffea arabica	Coffea	Rubiaceae	NA	QPCH00000000
Pseudomonas	syringae	cichorii	cichorii	11	11	NA	PchICMP1649	NA	USA	Belle Glade, Florida	celery	Apium graveolens	Apium	Apiaceae	NA	RBPN00000000
Pseudomonas	syringae	cichorii	cichorii	11	11	NA	PchICMP3353	NA	New Zealand	Nelson	tomato	Lycopersicon esculentum	Lycopersicon	Solanaceae	NA	RBRE00000000
Pseudomonas	syringae	cichorii	cichorii	11	11	NA	PchICMP6917	NA	New Zealand	NA	safflower	Carthamus tinctorius	Carthamus	Asteraceae	NA	RBRY00000000
Pseudomonas	syringae	NA	cichorii	11	11	NA	PcREF	2016	Brazil	Minas Gerais	coffee	Coffea arabica	Coffea	Rubiaceae	NA	QPCI00000000
Pseudomonas	syringae	NA	cichorii	11	11	NA	Psy0473	2016	Brazil	Minas Gerais	coffee	Coffea arabica	Coffea	Rubiaceae	NA	QPDS00000000
Pseudomonas	syringae	NA	cichorii	11	11	NA	Psy0474	2016	Brazil	Minas Gerais	coffee	Coffea arabica	Coffea	Rubiaceae	NA	QPDT00000000
Pseudomonas	syringae	NA	cichorii	11	11	NA	Psy0481	2016	Brazil	Minas Gerais	coffee	Coffea arabica	Coffea	Rubiaceae	NA	QPEA00000000
Pseudomonas	syringae	NA	cichorii	11	11	NA	Psy0482	2016	Brazil	Minas Gerais	coffee	Coffea arabica	Coffea	Rubiaceae	NA	QPEB00000000
Pseudomonas	syringae	savastanoi	glycinea	13	13a	NA	PgyICMP2236	NA	New Zealand	Helensville	soybean	Glycine max	Glycine	Fabaceae	NA	RBRO00000000
Pseudomonas	syringae	NA	syringae	13	13a	NA	PsyICMP2136	NA	NA	NA	NA	NA	NA	NA	NA	-
Pseudomonas	syringae	NA	syringae	13	13a	NA	PsyUB246	2006	France	Le Lauzet-Ubaye	NA	NA	NA	NA	Baltrus DA et al., 2014	AVEQ00000000
