# Supplementary material for: Molecular Evolution of Pseudomonas syringae Type III Secreted Effector Proteins
Source: Front Plant Sci. 2019 Apr 5;10:418. doi: 10.3389/fpls.2019.00418 (PMC6460904; doi:10.3389/fpls.2019.00418)
Supplement: Supplementary file 12 [file Data_Sheet_2.xlsx]

## Sheet: Sheet1
Complete Effector ID	Strain	Initial Family Name	Final Family Name	Final Family Name Short Form	Final Subfamily Name Short Form	Blast Analysis Family ID	PorthoMCL Analysis Family ID	Identical Effector Group ID	Nucleotide Sequence	Amino Acid Sequence	Length (Nuc)	Length (AA)
Pae0893_23_AvrA1a_1	Pae0893_23	AvrA	AvrA	AvrA	AvrA1	14	60	1	ATGTGGAACGTCAGTAAATCAAGCAACAACTTAGGCGCATATAAATTGCCCTTGGAAGCGCAAACGCCGCCTGAAAAAATTTCTCCTTTTGATGCCATGTCCGCAGCCCAACCCGAGGGCAAGGCGCCGCACGATCAGTTGCAAAACGATCAGTACCCTATCCAGCAAGCAGAAGACCGTGGCCGACACCTTGTCGAGCAAGCAGAAATCCAAGCGCATGTTCAGCATTGTCATTCAAAAGCTCCAGAAATAGGAGATGCAACAAAAACGCAATCTGTTTCCGAAAAACTTGGCACTGCTAAAAATTCATCATGTGATGCAACGCAAATTTCGACCGGCTCGAAAAATGATGACTTTCATAAAAANAAAGCAGGCTCTAATGGAGATATAAATAAATCT…	MWNVSKSSNNLGAYKLPLEAQTPPEKISPFDAMSAAQPEGKAPHDQLQNDQYPIQQAEDRGRHLVEQAEIQAHVQHCHSKAPEIGDATKTQSVSEKLGTAKNSSCDATQISTGSKNDDFHKXKAGSNGDINKSSDPSALRCSLSHAPRHVPKSKKSYGAATIGGKVYHPHEKTDSTTADFLSRSLSNNAYRSERHLRKRAIAYLNHISAEKEIISNACFAMKDVNSFAHKQSEWLCHLERSLWRDEPALQFHDRQQLGNEVLGLKKPDDQSPYFKPRAWKISDEAASAFAMMLKGESGPFTQDQVKVGFEICQEGELLAGRLNIQPRMAFRLKNRHDANRSGTHSVKSLSGLDLSSDVGTDIREFFQVPVMSGTSGTSSDVVIAARYAAMHSGLQWSAP…	2721	906
Pae2250_AvrA1a_1	Pae2250	AvrA	AvrA	AvrA	AvrA1	14	60	2	ATGTGGAACGTCAGTAAATCAAGCAACAACTTAGGCGCATATAAATTGCCCTTGGAAGCGCAAACGCCGCCTGAAAAAATTTCTCCTTTTGATGCCATGTCCGCAGCCCAACCCGAGGGCAAGGCGCCGCACGATCAGTTGCAAAACGATCAGTACCCTATCCAGCAAGCAGAAGACCGTGGCCGACACCTTGTCGAGCAAGCAGAAATCCAGGCGCATGTTCAGCATTGTCATTCAAAAGCTCCAGAAATAGGAGATGCAACAAAAACGCAATCTGTTTCCGAAAAACTTGTCACTGCTAAAAATTCATCATGTGATGCATCGCAAATTTCGATCGGCTCGAAAAATGATGACTTTCATAAAAATAAAGCAGGCTCTAATGGAGATATAAATAAATCT…	MWNVSKSSNNLGAYKLPLEAQTPPEKISPFDAMSAAQPEGKAPHDQLQNDQYPIQQAEDRGRHLVEQAEIQAHVQHCHSKAPEIGDATKTQSVSEKLVTAKNSSCDASQISIGSKNDDFHKNKAGSNGDINKSSDPSALRCSLSPAPRRVPKSKKSYGAATIGGKVYHPHEKTDSTITDFLSRSLSNNAYRSERHLRKRALAYLNHVSAEKEIISNVCFAMKDVNSFAHKQSEWLCHLERSLWRDEPALQFHDRQQLGNEVLGLKKPDDQSPYFKPRAWKISDEAASAFAMMLKGESGPFTQDQVKVGFEICQEGELLAGRLKIQPRMAFRLKNRHDANRSGTHSVKSLSGLDLSADVGTDIREFFQVPVMSGTSGTSSDVVIAARYAAMHSGLQWSAP…	2721	906
Pae3681_AvrA1a_1	Pae3681	AvrA	AvrA	AvrA	AvrA1	14	60	3	ATGTGGAACGTCAGTAAATCAAGCAACAACTTAGGCGCATATAAATTGCCCTTGGAAGCGCAAACGCCGCCTGAAAAAATTTCTCCTTTTGATGCCATGTCCGCAGCCCAACCCGAGGGCAAGGCGCCGCACGATCAGTTGCAAAACGATCAGTACCCTATCCAGCAAGCAGAAGACCGTGGCCGACACCTTGTCGAGCAAGCAGAAATCCAAGCGCATGTTCAGCATTGTCATTCAAAAGCTCCAGAAATAGGAGATGCAACAAAAACGCAATCTGTTTCCGAAAAACTTGGCACTGCTAAAAATTCATCATGTGATGCAACGCAAATTTCGACCGGCTCGAAAAATGATGACTTTCATAAAAATAAAGCAGGCTCTAATGGAGATATAAATAAATCT…	MWNVSKSSNNLGAYKLPLEAQTPPEKISPFDAMSAAQPEGKAPHDQLQNDQYPIQQAEDRGRHLVEQAEIQAHVQHCHSKAPEIGDATKTQSVSEKLGTAKNSSCDATQISTGSKNDDFHKNKAGSNGDINKSSDPSALRCSLSHAPRHVPKSKKSYGAATIGGKVYHPHEKTDSTTADFLSRSLSNNAYRSERHLRKRAIAYLNHISAEKEIISNACFAMKDVNSFAHKQSEWLCHLERSLWRDEPALQFHDRQQLGNEVLGLKKPDDQSPYFKPRAWKISDEAASAFAMMLKGESGPFTQDQVKVGFEICQEGELLAGRLNIQPRMAFRLKNRHDANRSGTHSVKSLSGLDLSSDVGTDIREFFQVPVMSGTSGTSSDVVIAARYAAMHSGLQWSAP…	2721	906
PaeICMP8947_AvrA1a_1	PaeICMP8947	AvrA	AvrA	AvrA	AvrA1	14	60	3	ATGTGGAACGTCAGTAAATCAAGCAACAACTTAGGCGCATATAAATTGCCCTTGGAAGCGCAAACGCCGCCTGAAAAAATTTCTCCTTTTGATGCCATGTCCGCAGCCCAACCCGAGGGCAAGGCGCCGCACGATCAGTTGCAAAACGATCAGTACCCTATCCAGCAAGCAGAAGACCGTGGCCGACACCTTGTCGAGCAAGCAGAAATCCAAGCGCATGTTCAGCATTGTCATTCAAAAGCTCCAGAAATAGGAGATGCAACAAAAACGCAATCTGTTTCCGAAAAACTTGGCACTGCTAAAAATTCATCATGTGATGCAACGCAAATTTCGACCGGCTCGAAAAATGATGACTTTCATAAAAATAAAGCAGGCTCTAATGGAGATATAAATAAATCT…	MWNVSKSSNNLGAYKLPLEAQTPPEKISPFDAMSAAQPEGKAPHDQLQNDQYPIQQAEDRGRHLVEQAEIQAHVQHCHSKAPEIGDATKTQSVSEKLGTAKNSSCDATQISTGSKNDDFHKNKAGSNGDINKSSDPSALRCSLSHAPRHVPKSKKSYGAATIGGKVYHPHEKTDSTTADFLSRSLSNNAYRSERHLRKRAIAYLNHISAEKEIISNACFAMKDVNSFAHKQSEWLCHLERSLWRDEPALQFHDRQQLGNEVLGLKKPDDQSPYFKPRAWKISDEAASAFAMMLKGESGPFTQDQVKVGFEICQEGELLAGRLNIQPRMAFRLKNRHDANRSGTHSVKSLSGLDLSSDVGTDIREFFQVPVMSGTSGTSSDVVIAARYAAMHSGLQWSAP…	2721	906
PbrICMP13650_AvrA1a_1	PbrICMP13650	AvrA	AvrA	AvrA	AvrA1	14	60	4	ATGTGGAACGTCAGTAAATCAAGCAACAACTTAGGCGCATATAAATTGCCCTTGGAAGCGCAAACGCCGCCTGAAAAAATTTCTCCTTTTGATGCCATGTCCGCAGCCCAACCCGAGGGCAAGGCGCCGCACGATCAGTTGCAAAACGATCAGTACCCTATCCAGCAAGCAGAAGACCGTGGCCGACACCTTGTCGAGCAAGCAGAAATCCAGGCGCATGTTCAGCATTGTCATTCAAAAGCTCCAGAAATAGGAGATGCAACAAAAACGCAATCTGTTTCCGAAAAACTTGGCACTGCTAAAAATTCATCATGTGATGCAACGCAAATTTCGACCGGCTCGAAAAATGATGACTTTCATAAAAATAAAGCAGGCTCTAATGGAGATATAAATAAATCT…	MWNVSKSSNNLGAYKLPLEAQTPPEKISPFDAMSAAQPEGKAPHDQLQNDQYPIQQAEDRGRHLVEQAEIQAHVQHCHSKAPEIGDATKTQSVSEKLGTAKNSSCDATQISTGSKNDDFHKNKAGSNGDINKSSDPSALRCSLSHAPRRVPKSKKSYGAATIGGKVYHPHEKTDSTIADFLSRSLSNNAYRSERHLRKRAIAYLNHISAEKEIISNACFAMKDVNSFAHKQSEWLCHLERSLWRDEPALQFHDRQQLGNEVLGLKKPDDQSPYFKPRAWKISDEAASAFAMMLKGESGPFTQDQVKVGFEICQEGELLAGRLNIQPRMAFRLKNRHDANRSGTHSVKSLSGLDLSADVGTDIREFFQVPVMSGTSGTSSDVVIAARYAAMHSGLQWSAP…	2721	906
PbrICMP13684_AvrA1a_1	PbrICMP13684	AvrA	AvrA	AvrA	AvrA1	14	60	4	ATGTGGAACGTCAGTAAATCAAGCAACAACTTAGGCGCATATAAATTGCCCTTGGAAGCGCAAACGCCGCCTGAAAAAATTTCTCCTTTTGATGCCATGTCCGCAGCCCAACCCGAGGGCAAGGCGCCGCACGATCAGTTGCAAAACGATCAGTACCCTATCCAGCAAGCAGAAGACCGTGGCCGACACCTTGTCGAGCAAGCAGAAATCCAGGCGCATGTTCAGCATTGTCATTCAAAAGCTCCAGAAATAGGAGATGCAACAAAAACGCAATCTGTTTCCGAAAAACTTGGCACTGCTAAAAATTCATCATGTGATGCAACGCAAATTTCGACCGGCTCGAAAAATGATGACTTTCATAAAAATAAAGCAGGCTCTAATGGAGATATAAATAAATCT…	MWNVSKSSNNLGAYKLPLEAQTPPEKISPFDAMSAAQPEGKAPHDQLQNDQYPIQQAEDRGRHLVEQAEIQAHVQHCHSKAPEIGDATKTQSVSEKLGTAKNSSCDATQISTGSKNDDFHKNKAGSNGDINKSSDPSALRCSLSHAPRRVPKSKKSYGAATIGGKVYHPHEKTDSTIADFLSRSLSNNAYRSERHLRKRAIAYLNHISAEKEIISNACFAMKDVNSFAHKQSEWLCHLERSLWRDEPALQFHDRQQLGNEVLGLKKPDDQSPYFKPRAWKISDEAASAFAMMLKGESGPFTQDQVKVGFEICQEGELLAGRLNIQPRMAFRLKNRHDANRSGTHSVKSLSGLDLSADVGTDIREFFQVPVMSGTSGTSSDVVIAARYAAMHSGLQWSAP…	2721	906
PbrICMP13685_AvrA1a_1	PbrICMP13685	AvrA	AvrA	AvrA	AvrA1	14	60	4	ATGTGGAACGTCAGTAAATCAAGCAACAACTTAGGCGCATATAAATTGCCCTTGGAAGCGCAAACGCCGCCTGAAAAAATTTCTCCTTTTGATGCCATGTCCGCAGCCCAACCCGAGGGCAAGGCGCCGCACGATCAGTTGCAAAACGATCAGTACCCTATCCAGCAAGCAGAAGACCGTGGCCGACACCTTGTCGAGCAAGCAGAAATCCAGGCGCATGTTCAGCATTGTCATTCAAAAGCTCCAGAAATAGGAGATGCAACAAAAACGCAATCTGTTTCCGAAAAACTTGGCACTGCTAAAAATTCATCATGTGATGCAACGCAAATTTCGACCGGCTCGAAAAATGATGACTTTCATAAAAATAAAGCAGGCTCTAATGGAGATATAAATAAATCT…	MWNVSKSSNNLGAYKLPLEAQTPPEKISPFDAMSAAQPEGKAPHDQLQNDQYPIQQAEDRGRHLVEQAEIQAHVQHCHSKAPEIGDATKTQSVSEKLGTAKNSSCDATQISTGSKNDDFHKNKAGSNGDINKSSDPSALRCSLSHAPRRVPKSKKSYGAATIGGKVYHPHEKTDSTIADFLSRSLSNNAYRSERHLRKRAIAYLNHISAEKEIISNACFAMKDVNSFAHKQSEWLCHLERSLWRDEPALQFHDRQQLGNEVLGLKKPDDQSPYFKPRAWKISDEAASAFAMMLKGESGPFTQDQVKVGFEICQEGELLAGRLNIQPRMAFRLKNRHDANRSGTHSVKSLSGLDLSADVGTDIREFFQVPVMSGTSGTSSDVVIAARYAAMHSGLQWSAP…	2721	906
PmoICMP4331_AvrA1a_1	PmoICMP4331	AvrA	AvrA	AvrA	AvrA1	14	60	4	ATGTGGAACGTCAGTAAATCAAGCAACAACTTAGGCGCATATAAATTGCCCTTGGAAGCGCAAACGCCGCCTGAAAAAATTTCTCCTTTTGATGCCATGTCCGCAGCCCAACCCGAGGGCAAGGCGCCGCACGATCAGTTGCAAAACGATCAGTACCCTATCCAGCAAGCAGAAGACCGTGGCCGACACCTTGTCGAGCAAGCAGAAATCCAGGCGCATGTTCAGCATTGTCATTCAAAAGCTCCAGAAATAGGAGATGCAACAAAAACGCAATCTGTTTCCGAAAAACTTGGCACTGCTAAAAATTCATCATGTGATGCAACGCAAATTTCGACCGGCTCGAAAAATGATGACTTTCATAAAAATAAAGCAGGCTCTAATGGAGATATAAATAAATCT…	MWNVSKSSNNLGAYKLPLEAQTPPEKISPFDAMSAAQPEGKAPHDQLQNDQYPIQQAEDRGRHLVEQAEIQAHVQHCHSKAPEIGDATKTQSVSEKLGTAKNSSCDATQISTGSKNDDFHKNKAGSNGDINKSSDPSALRCSLSHAPRRVPKSKKSYGAATIGGKVYHPHEKTDSTIADFLSRSLSNNAYRSERHLRKRAIAYLNHISAEKEIISNACFAMKDVNSFAHKQSEWLCHLERSLWRDEPALQFHDRQQLGNEVLGLKKPDDQSPYFKPRAWKISDEAASAFAMMLKGESGPFTQDQVKVGFEICQEGELLAGRLNIQPRMAFRLKNRHDANRSGTHSVKSLSGLDLSADVGTDIREFFQVPVMSGTSGTSSDVVIAARYAAMHSGLQWSAP…	2721	906
PfrICMP9129_AvrA1a_1	PfrICMP9129	AvrA	AvrA	AvrA	AvrA1	14	60	5	ATGTGGAACGTCAGTAAATCAAGCAACAACTTAGGCGCATATAAATTGCCTTTGGAAGCGCAAACGCCGCCTGAAAAAATTTGTCCTTTTGATGCCATGTCCGCAGCCCAACCCGAGGGCAAGGCGCCGCACGATCAGTTGCAAAACGATCAGTACCCTATCCAGCAAGCAGAAGACCGTGGCCGACACCTTGTCGAGCAAGCAGAAATCCAGGCGCATGTTCAGCATTGTCATTCAAAAGCTCCAGAAATAGGAGATGCAACAAAAACGCAATCTGTTTCCGAAAAACTTGGCACTGCTAAAAATTCATCATGTGATGCATCGCAAATTTCGATCGGCTCGAAAAATGATGACTTTCATAAAAATAAAGCAGGCTCTAATGGAGATATAAATAAATCT…	MWNVSKSSNNLGAYKLPLEAQTPPEKICPFDAMSAAQPEGKAPHDQLQNDQYPIQQAEDRGRHLVEQAEIQAHVQHCHSKAPEIGDATKTQSVSEKLGTAKNSSCDASQISIGSKNDDFHKNKAGSNGDINKSSAPSALRCSLSPAPRRVPKSKKSYGAATIGGKVYHPHEKTDSTIADFLSRSLSNNAYRSERHLRKRALAYLNHISAEKEIISNACFAMKDVNSFAHKQSEWLCHLERSLWRDEPALQFHDRQQLGNEVLGLKKPDDQSPYFKPRAWKISDEAASAFAMMLKGESGPFTQDQVKVGFEICQEGELLAGRLKIQPRMAFRLKNRHDANRSGTHSVKSLSGLDLSADVGTDIREFFQVPVMSGTSGTSSDVVIAARYAAMHAGLQWSAP…	2721	906
PmaM4a_AvrA1a_1	PmaM4a	AvrA	AvrA	AvrA	AvrA1	14	60	6	ATGTGGAACGTCAGTAAATCAAGCAACAACTTAGGCGCATATAAATTGCCTTTGGAAGCGCAAACGCCGCCTGAAAAAATTTGTCCTTTTGATGCCATGTCCGCAGCCCAACCCGAGGGCAAGGCGCCGCACGATCAGTTGCAAAACGATCAGTACCCTATCCAGCAAGCAGAAGACCGTGGCCGACACCTTGTCGAGCAAGCAGAAATCCAGGCGCATGTTCAGCATTGTCATTCAAAAGCTCCAGAAATAGGAGATGCAACAAAAACGCAATCTGTTTCCGAAAAACTTGGCACTGCTAAAAATTCATCATGTGATGCATCGCAAATTTCGATCGGCTCGAAAAATGATGACTTTCATAAAAATAAAGCAGGCTCTAATGGAGATATAAATAAATCT…	MWNVSKSSNNLGAYKLPLEAQTPPEKICPFDAMSAAQPEGKAPHDQLQNDQYPIQQAEDRGRHLVEQAEIQAHVQHCHSKAPEIGDATKTQSVSEKLGTAKNSSCDASQISIGSKNDDFHKNKAGSNGDINKSSAPSALRCSLSPAPRRVPKSKKSYGAATIGGKVYHPHEKTDSTIADFLSRSLSNNAYRSERHLRKRALAYLNHISAEKEIISNACFAMKDVNSFAHKQSEWLCHLERSLWRDEPALQFHDRQQLGNEVLGLKKPDDQSPYFKPRAWKISDEAASAFAMMLKGESGPFTQDQVKVGFEICQEGELLAGRLKIQPRMAFRLKNRHDSNRSGTHSVKSLSGLDLSADVGTDIREFFQVPVMSGTSGTSSDVVIAARYAAMHAGLQWSAP…	2721	906
PmpICMP3897_AvrA1a_1	PmpICMP3897	AvrA	AvrA	AvrA	AvrA1	14	60	6	ATGTGGAACGTCAGTAAATCAAGCAACAACTTAGGCGCATATAAATTGCCTTTGGAAGCGCAAACGCCGCCTGAAAAAATTTGTCCTTTTGATGCCATGTCCGCAGCCCAACCCGAGGGCAAGGCGCCGCACGATCAGTTGCAAAACGATCAGTACCCTATCCAGCAAGCAGAAGACCGTGGCCGACACCTTGTCGAGCAAGCAGAAATCCAGGCGCATGTTCAGCATTGTCATTCAAAAGCTCCAGAAATAGGAGATGCAACAAAAACGCAATCTGTTTCCGAAAAACTTGGCACTGCTAAAAATTCATCATGTGATGCATCGCAAATTTCGATCGGCTCGAAAAATGATGACTTTCATAAAAATAAAGCAGGCTCTAATGGAGATATAAATAAATCT…	MWNVSKSSNNLGAYKLPLEAQTPPEKICPFDAMSAAQPEGKAPHDQLQNDQYPIQQAEDRGRHLVEQAEIQAHVQHCHSKAPEIGDATKTQSVSEKLGTAKNSSCDASQISIGSKNDDFHKNKAGSNGDINKSSAPSALRCSLSPAPRRVPKSKKSYGAATIGGKVYHPHEKTDSTIADFLSRSLSNNAYRSERHLRKRALAYLNHISAEKEIISNACFAMKDVNSFAHKQSEWLCHLERSLWRDEPALQFHDRQQLGNEVLGLKKPDDQSPYFKPRAWKISDEAASAFAMMLKGESGPFTQDQVKVGFEICQEGELLAGRLKIQPRMAFRLKNRHDSNRSGTHSVKSLSGLDLSADVGTDIREFFQVPVMSGTSGTSSDVVIAARYAAMHAGLQWSAP…	2721	906
Pto1108_AvrA1a_1	Pto1108	AvrA	AvrA	AvrA	AvrA1	14	60	6	ATGTGGAACGTCAGTAAATCAAGCAACAACTTAGGCGCATATAAATTGCCTTTGGAAGCGCAAACGCCGCCTGAAAAAATTTGTCCTTTTGATGCCATGTCCGCAGCCCAACCCGAGGGCAAGGCGCCGCACGATCAGTTGCAAAACGATCAGTACCCTATCCAGCAAGCAGAAGACCGTGGCCGACACCTTGTCGAGCAAGCAGAAATCCAGGCGCATGTTCAGCATTGTCATTCAAAAGCTCCAGAAATAGGAGATGCAACAAAAACGCAATCTGTTTCCGAAAAACTTGGCACTGCTAAAAATTCATCATGTGATGCATCGCAAATTTCGATCGGCTCGAAAAATGATGACTTTCATAAAAATAAAGCAGGCTCTAATGGAGATATAAATAAATCT…	MWNVSKSSNNLGAYKLPLEAQTPPEKICPFDAMSAAQPEGKAPHDQLQNDQYPIQQAEDRGRHLVEQAEIQAHVQHCHSKAPEIGDATKTQSVSEKLGTAKNSSCDASQISIGSKNDDFHKNKAGSNGDINKSSAPSALRCSLSPAPRRVPKSKKSYGAATIGGKVYHPHEKTDSTIADFLSRSLSNNAYRSERHLRKRALAYLNHISAEKEIISNACFAMKDVNSFAHKQSEWLCHLERSLWRDEPALQFHDRQQLGNEVLGLKKPDDQSPYFKPRAWKISDEAASAFAMMLKGESGPFTQDQVKVGFEICQEGELLAGRLKIQPRMAFRLKNRHDSNRSGTHSVKSLSGLDLSADVGTDIREFFQVPVMSGTSGTSSDVVIAARYAAMHAGLQWSAP…	2721	906
PtoICMP2841_AvrA1a_1	PtoICMP2841	AvrA	AvrA	AvrA	AvrA1	14	60	6	ATGTGGAACGTCAGTAAATCAAGCAACAACTTAGGCGCATATAAATTGCCTTTGGAAGCGCAAACGCCGCCTGAAAAAATTTGTCCTTTTGATGCCATGTCCGCAGCCCAACCCGAGGGCAAGGCGCCGCACGATCAGTTGCAAAACGATCAGTACCCTATCCAGCAAGCAGAAGACCGTGGCCGACACCTTGTCGAGCAAGCAGAAATCCAGGCGCATGTTCAGCATTGTCATTCAAAAGCTCCAGAAATAGGAGATGCAACAAAAACGCAATCTGTTTCCGAAAAACTTGGCACTGCTAAAAATTCATCATGTGATGCATCGCAAATTTCGATCGGCTCGAAAAATGATGACTTTCATAAAAATAAAGCAGGCTCTAATGGAGATATAAATAAATCT…	MWNVSKSSNNLGAYKLPLEAQTPPEKICPFDAMSAAQPEGKAPHDQLQNDQYPIQQAEDRGRHLVEQAEIQAHVQHCHSKAPEIGDATKTQSVSEKLGTAKNSSCDASQISIGSKNDDFHKNKAGSNGDINKSSAPSALRCSLSPAPRRVPKSKKSYGAATIGGKVYHPHEKTDSTIADFLSRSLSNNAYRSERHLRKRALAYLNHISAEKEIISNACFAMKDVNSFAHKQSEWLCHLERSLWRDEPALQFHDRQQLGNEVLGLKKPDDQSPYFKPRAWKISDEAASAFAMMLKGESGPFTQDQVKVGFEICQEGELLAGRLKIQPRMAFRLKNRHDSNRSGTHSVKSLSGLDLSADVGTDIREFFQVPVMSGTSGTSSDVVIAARYAAMHAGLQWSAP…	2721	906
PtoICMP4263_AvrA1a_1	PtoICMP4263	AvrA	AvrA	AvrA	AvrA1	14	60	6	ATGTGGAACGTCAGTAAATCAAGCAACAACTTAGGCGCATATAAATTGCCTTTGGAAGCGCAAACGCCGCCTGAAAAAATTTGTCCTTTTGATGCCATGTCCGCAGCCCAACCCGAGGGCAAGGCGCCGCACGATCAGTTGCAAAACGATCAGTACCCTATCCAGCAAGCAGAAGACCGTGGCCGACACCTTGTCGAGCAAGCAGAAATCCAGGCGCATGTTCAGCATTGTCATTCAAAAGCTCCAGAAATAGGAGATGCAACAAAAACGCAATCTGTTTCCGAAAAACTTGGCACTGCTAAAAATTCATCATGTGATGCATCGCAAATTTCGATCGGCTCGAAAAATGATGACTTTCATAAAAATAAAGCAGGCTCTAATGGAGATATAAATAAATCT…	MWNVSKSSNNLGAYKLPLEAQTPPEKICPFDAMSAAQPEGKAPHDQLQNDQYPIQQAEDRGRHLVEQAEIQAHVQHCHSKAPEIGDATKTQSVSEKLGTAKNSSCDASQISIGSKNDDFHKNKAGSNGDINKSSAPSALRCSLSPAPRRVPKSKKSYGAATIGGKVYHPHEKTDSTIADFLSRSLSNNAYRSERHLRKRALAYLNHISAEKEIISNACFAMKDVNSFAHKQSEWLCHLERSLWRDEPALQFHDRQQLGNEVLGLKKPDDQSPYFKPRAWKISDEAASAFAMMLKGESGPFTQDQVKVGFEICQEGELLAGRLKIQPRMAFRLKNRHDSNRSGTHSVKSLSGLDLSADVGTDIREFFQVPVMSGTSGTSSDVVIAARYAAMHAGLQWSAP…	2721	906
PtoICMP7230_AvrA1a_1	PtoICMP7230	AvrA	AvrA	AvrA	AvrA1	14	60	6	ATGTGGAACGTCAGTAAATCAAGCAACAACTTAGGCGCATATAAATTGCCTTTGGAAGCGCAAACGCCGCCTGAAAAAATTTGTCCTTTTGATGCCATGTCCGCAGCCCAACCCGAGGGCAAGGCGCCGCACGATCAGTTGCAAAACGATCAGTACCCTATCCAGCAAGCAGAAGACCGTGGCCGACACCTTGTCGAGCAAGCAGAAATCCAGGCGCATGTTCAGCATTGTCATTCAAAAGCTCCAGAAATAGGAGATGCAACAAAAACGCAATCTGTTTCCGAAAAACTTGGCACTGCTAAAAATTCATCATGTGATGCATCGCAAATTTCGATCGGCTCGAAAAATGATGACTTTCATAAAAATAAAGCAGGCTCTAATGGAGATATAAATAAATCT…	MWNVSKSSNNLGAYKLPLEAQTPPEKICPFDAMSAAQPEGKAPHDQLQNDQYPIQQAEDRGRHLVEQAEIQAHVQHCHSKAPEIGDATKTQSVSEKLGTAKNSSCDASQISIGSKNDDFHKNKAGSNGDINKSSAPSALRCSLSPAPRRVPKSKKSYGAATIGGKVYHPHEKTDSTIADFLSRSLSNNAYRSERHLRKRALAYLNHISAEKEIISNACFAMKDVNSFAHKQSEWLCHLERSLWRDEPALQFHDRQQLGNEVLGLKKPDDQSPYFKPRAWKISDEAASAFAMMLKGESGPFTQDQVKVGFEICQEGELLAGRLKIQPRMAFRLKNRHDSNRSGTHSVKSLSGLDLSADVGTDIREFFQVPVMSGTSGTSSDVVIAARYAAMHAGLQWSAP…	2721	906
PtoK40_AvrA1a_1	PtoK40	AvrA	AvrA	AvrA	AvrA1	14	60	6	ATGTGGAACGTCAGTAAATCAAGCAACAACTTAGGCGCATATAAATTGCCTTTGGAAGCGCAAACGCCGCCTGAAAAAATTTGTCCTTTTGATGCCATGTCCGCAGCCCAACCCGAGGGCAAGGCGCCGCACGATCAGTTGCAAAACGATCAGTACCCTATCCAGCAAGCAGAAGACCGTGGCCGACACCTTGTCGAGCAAGCAGAAATCCAGGCGCATGTTCAGCATTGTCATTCAAAAGCTCCAGAAATAGGAGATGCAACAAAAACGCAATCTGTTTCCGAAAAACTTGGCACTGCTAAAAATTCATCATGTGATGCATCGCAAATTTCGATCGGCTCGAAAAATGATGACTTTCATAAAAATAAAGCAGGCTCTAATGGAGATATAAATAAATCT…	MWNVSKSSNNLGAYKLPLEAQTPPEKICPFDAMSAAQPEGKAPHDQLQNDQYPIQQAEDRGRHLVEQAEIQAHVQHCHSKAPEIGDATKTQSVSEKLGTAKNSSCDASQISIGSKNDDFHKNKAGSNGDINKSSAPSALRCSLSPAPRRVPKSKKSYGAATIGGKVYHPHEKTDSTIADFLSRSLSNNAYRSERHLRKRALAYLNHISAEKEIISNACFAMKDVNSFAHKQSEWLCHLERSLWRDEPALQFHDRQQLGNEVLGLKKPDDQSPYFKPRAWKISDEAASAFAMMLKGESGPFTQDQVKVGFEICQEGELLAGRLKIQPRMAFRLKNRHDSNRSGTHSVKSLSGLDLSADVGTDIREFFQVPVMSGTSGTSSDVVIAARYAAMHAGLQWSAP…	2721	906
PtoMax13_AvrA1a_1	PtoMax13	AvrA	AvrA	AvrA	AvrA1	14	60	6	ATGTGGAACGTCAGTAAATCAAGCAACAACTTAGGCGCATATAAATTGCCTTTGGAAGCGCAAACGCCGCCTGAAAAAATTTGTCCTTTTGATGCCATGTCCGCAGCCCAACCCGAGGGCAAGGCGCCGCACGATCAGTTGCAAAACGATCAGTACCCTATCCAGCAAGCAGAAGACCGTGGCCGACACCTTGTCGAGCAAGCAGAAATCCAGGCGCATGTTCAGCATTGTCATTCAAAAGCTCCAGAAATAGGAGATGCAACAAAAACGCAATCTGTTTCCGAAAAACTTGGCACTGCTAAAAATTCATCATGTGATGCATCGCAAATTTCGATCGGCTCGAAAAATGATGACTTTCATAAAAATAAAGCAGGCTCTAATGGAGATATAAATAAATCT…	MWNVSKSSNNLGAYKLPLEAQTPPEKICPFDAMSAAQPEGKAPHDQLQNDQYPIQQAEDRGRHLVEQAEIQAHVQHCHSKAPEIGDATKTQSVSEKLGTAKNSSCDASQISIGSKNDDFHKNKAGSNGDINKSSAPSALRCSLSPAPRRVPKSKKSYGAATIGGKVYHPHEKTDSTIADFLSRSLSNNAYRSERHLRKRALAYLNHISAEKEIISNACFAMKDVNSFAHKQSEWLCHLERSLWRDEPALQFHDRQQLGNEVLGLKKPDDQSPYFKPRAWKISDEAASAFAMMLKGESGPFTQDQVKVGFEICQEGELLAGRLKIQPRMAFRLKNRHDSNRSGTHSVKSLSGLDLSADVGTDIREFFQVPVMSGTSGTSSDVVIAARYAAMHAGLQWSAP…	2721	906
PtoT1_AvrA1a_1	PtoT1	AvrA	AvrA	AvrA	AvrA1	14	60	6	ATGTGGAACGTCAGTAAATCAAGCAACAACTTAGGCGCATATAAATTGCCTTTGGAAGCGCAAACGCCGCCTGAAAAAATTTGTCCTTTTGATGCCATGTCCGCAGCCCAACCCGAGGGCAAGGCGCCGCACGATCAGTTGCAAAACGATCAGTACCCTATCCAGCAAGCAGAAGACCGTGGCCGACACCTTGTCGAGCAAGCAGAAATCCAGGCGCATGTTCAGCATTGTCATTCAAAAGCTCCAGAAATAGGAGATGCAACAAAAACGCAATCTGTTTCCGAAAAACTTGGCACTGCTAAAAATTCATCATGTGATGCATCGCAAATTTCGATCGGCTCGAAAAATGATGACTTTCATAAAAATAAAGCAGGCTCTAATGGAGATATAAATAAATCT…	MWNVSKSSNNLGAYKLPLEAQTPPEKICPFDAMSAAQPEGKAPHDQLQNDQYPIQQAEDRGRHLVEQAEIQAHVQHCHSKAPEIGDATKTQSVSEKLGTAKNSSCDASQISIGSKNDDFHKNKAGSNGDINKSSAPSALRCSLSPAPRRVPKSKKSYGAATIGGKVYHPHEKTDSTIADFLSRSLSNNAYRSERHLRKRALAYLNHISAEKEIISNACFAMKDVNSFAHKQSEWLCHLERSLWRDEPALQFHDRQQLGNEVLGLKKPDDQSPYFKPRAWKISDEAASAFAMMLKGESGPFTQDQVKVGFEICQEGELLAGRLKIQPRMAFRLKNRHDSNRSGTHSVKSLSGLDLSADVGTDIREFFQVPVMSGTSGTSSDVVIAARYAAMHAGLQWSAP…	2721	906
PmpFTRS_U7_AvrA1a_1	PmpFTRS_U7	AvrA	AvrA	AvrA	AvrA1	14	60	7	ATGTGGAACGTCAGTAAATCAAGCAACAACTTAGGCGCATATAAATTGCCCTTGGAAGCGCAAACGCCGCCTGAAAAAATTTCTCCTTTTGATGCCATGTCCGCAGCCCAACCCGAGGGCAAGGCGCCGCACGATCAGTTGCAAAACGATCAGTACCCTATCCAGCAAGCAGAAGACCGTGGCCGACACCTTGTCGAGCAAGCAGAAATCCAGGCGCATGTTCAGCATTGTCATTCAAAAGCTCCAGAAATAGGAGATGCAACAAAAACGCAATCTGTTTCCGAAAAACTTGGCACTGCTAAAAAATCATCATGTGATGCATCGCAAATTTCGATCGGCTCGAAAAATGATGACTTTCATAAAAATAAAGCAGACTCTAATGGAGATATAAATAAATCT…	MWNVSKSSNNLGAYKLPLEAQTPPEKISPFDAMSAAQPEGKAPHDQLQNDQYPIQQAEDRGRHLVEQAEIQAHVQHCHSKAPEIGDATKTQSVSEKLGTAKKSSCDASQISIGSKNDDFHKNKADSNGDINKSSDPSALRCSLSPAPRRVPKSEKSYGAATIGGKVYHPHEKKDSTIADFLSRSLSNNAYRSERHLRKRALAYLNHISAEKEIISNACFAMKDVNSFAHKQSEWLCHLERSLWRDEPALQFHDRQQLGNEVLGLKKPDDQSPYFKSRAWKISDEAASAFAMMLKGESGPFTQDQVKVGFEICQEGELLAGRLKIQPRMAFRLKNRHDANRSGTHSVKSLSGLDLSADVGTDIREFFQVPVMSGTSGTSSDVVIAARYAAMHSGLQWSAP…	2721	906
PpeICMP5786_AvrA1a_1	PpeICMP5786	AvrA	AvrA	AvrA	AvrA1	14	60	8	ATGTGGAACGTCAGTAAATCAAGCAACAACTTAGGCGCATATAAATTGCCTTTGGAAGCGCAAACGCCGCCTGAAAAAATTTGTCCTTTTGATGCCATGTCCGCAGCCCAACCCGAGGGCAAGGCGCCGCACGATCAGTTGCAAAACGATCAGTACCCTATCCAGCAAGCAGAAGACCGTGGCCGACACCTTGTCGAGCAAGCAGAAATCCAGGCGCATGTTCAGCATTGTCATTCAAAAGCTCCAGAAATAGGAGATGCAACAAAAACGCAATCTGTTTCCGAAAAACTTGGCACTGCTAAAAATTCATCATGTGATGCATCGCAAATTTCGATCGGCTCGAAAAATGATGACTTTCATAAAAATAAAGCAGGCTCTAATGGAGATATAAATAAATCT…	MWNVSKSSNNLGAYKLPLEAQTPPEKICPFDAMSAAQPEGKAPHDQLQNDQYPIQQAEDRGRHLVEQAEIQAHVQHCHSKAPEIGDATKTQSVSEKLGTAKNSSCDASQISIGSKNDDFHKNKAGSNGDINKSSAPSALRCSLSPAPRRVPKSKKSYGAATIGGKVYHPHEKTDSTIADFLSRSLSNNAYRSERHLRKRALAYLNHISAEKEIISNACFAMKDVNSFAHKQSEWLCHLERSLWRDEPALQFHDRQQLGNEVLGLKKPDDQSPYFKPRAWKISDEAASAFAMMLKGESGPFTQDQVKVGFEICQEGELLAGRLKIQPRMAFRLKNRHDANRSGTHSVKSLSGLDLSADVGTDIREFFQVPVMSGTSGTSSDVVIAARYAAMHAGLQWSAP…	2721	906
PseHC_1_AvrA1a_1	PseHC_1	AvrA	AvrA	AvrA	AvrA1	14	60	9	ATGTGGAACGTCAGTAAATCAAGCAACAACTTAGGCGCATATAAATTGCCCTTGGAAGCGCAAACGCCGCCTGAAAAAATTTCTCCTTTTGATGCCATGTCCGCAGCCCAACCCGAGGGCAAGGCGCCGCACGATCAGTTGCAAAACGATCAGTACCCTATCCAGCAAGCAGAAGACCGTGGCCGACACCTTGTCGAGCAAGCAGAAATCCAGGCGCATGTTCAGCATTGTCATTCAAAAGCTCCAGAAATAGGAGATGCAACAAAAACGCAATCTGTTTCCGAAAAACTTGGCACTGCTAAAAACTCATCATGTGATGCATCGCAAATTTTGATCGGCTCGAAAAATGATGACTTTCATAAAAATAAAGCAGGCTCTAATGGAGATATAAATAAATCT…	MWNVSKSSNNLGAYKLPLEAQTPPEKISPFDAMSAAQPEGKAPHDQLQNDQYPIQQAEDRGRHLVEQAEIQAHVQHCHSKAPEIGDATKTQSVSEKLGTAKNSSCDASQILIGSKNDDFHKNKAGSNGDINKSSDPSALRCSLSPAPRRVPKSKKSYGAATIGGKVYHPHEKTDSTIADFLSRSLSNNAYRSERHLRKRALAYLNHISAEKEIISNACFAMKDVNSFAHKQSEWLCHLERSLWRDEPALQFHDRQQLGNEVLGLKKPDDQSPYFKPRAWKISDEAASAFAMMLKGESGPFTQDQVKVGFEICQEGELLAGRLKIQPRMAFRLKNRHDANRSGTHSVKSLSGLDLSADVGTDIREFFQVPVMSGTSGTSSDVVIAARYAAMHAGLKWSAP…	2721	906
PseICMP7459_AvrA1a_1	PseICMP7459	AvrA	AvrA	AvrA	AvrA1	14	60	9	ATGTGGAACGTCAGTAAATCAAGCAACAACTTAGGCGCATATAAATTGCCCTTGGAAGCGCAAACGCCGCCTGAAAAAATTTCTCCTTTTGATGCCATGTCCGCAGCCCAACCCGAGGGCAAGGCGCCGCACGATCAGTTGCAAAACGATCAGTACCCTATCCAGCAAGCAGAAGACCGTGGCCGACACCTTGTCGAGCAAGCAGAAATCCAGGCGCATGTTCAGCATTGTCATTCAAAAGCTCCAGAAATAGGAGATGCAACAAAAACGCAATCTGTTTCCGAAAAACTTGGCACTGCTAAAAACTCATCATGTGATGCATCGCAAATTTTGATCGGCTCGAAAAATGATGACTTTCATAAAAATAAAGCAGGCTCTAATGGAGATATAAATAAATCT…	MWNVSKSSNNLGAYKLPLEAQTPPEKISPFDAMSAAQPEGKAPHDQLQNDQYPIQQAEDRGRHLVEQAEIQAHVQHCHSKAPEIGDATKTQSVSEKLGTAKNSSCDASQILIGSKNDDFHKNKAGSNGDINKSSDPSALRCSLSPAPRRVPKSKKSYGAATIGGKVYHPHEKTDSTIADFLSRSLSNNAYRSERHLRKRALAYLNHISAEKEIISNACFAMKDVNSFAHKQSEWLCHLERSLWRDEPALQFHDRQQLGNEVLGLKKPDDQSPYFKPRAWKISDEAASAFAMMLKGESGPFTQDQVKVGFEICQEGELLAGRLKIQPRMAFRLKNRHDANRSGTHSVKSLSGLDLSADVGTDIREFFQVPVMSGTSGTSSDVVIAARYAAMHAGLKWSAP…	2721	906
PseICMP763_AvrA1a_1	PseICMP763	AvrA	AvrA	AvrA	AvrA1	14	60	9	ATGTGGAACGTCAGTAAATCAAGCAACAACTTAGGCGCATATAAATTGCCCTTGGAAGCGCAAACGCCGCCTGAAAAAATTTCTCCTTTTGATGCCATGTCCGCAGCCCAACCCGAGGGCAAGGCGCCGCACGATCAGTTGCAAAACGATCAGTACCCTATCCAGCAAGCAGAAGACCGTGGCCGACACCTTGTCGAGCAAGCAGAAATCCAGGCGCATGTTCAGCATTGTCATTCAAAAGCTCCAGAAATAGGAGATGCAACAAAAACGCAATCTGTTTCCGAAAAACTTGGCACTGCTAAAAACTCATCATGTGATGCATCGCAAATTTTGATCGGCTCGAAAAATGATGACTTTCATAAAAATAAAGCAGGCTCTAATGGAGATATAAATAAATCT…	MWNVSKSSNNLGAYKLPLEAQTPPEKISPFDAMSAAQPEGKAPHDQLQNDQYPIQQAEDRGRHLVEQAEIQAHVQHCHSKAPEIGDATKTQSVSEKLGTAKNSSCDASQILIGSKNDDFHKNKAGSNGDINKSSDPSALRCSLSPAPRRVPKSKKSYGAATIGGKVYHPHEKTDSTIADFLSRSLSNNAYRSERHLRKRALAYLNHISAEKEIISNACFAMKDVNSFAHKQSEWLCHLERSLWRDEPALQFHDRQQLGNEVLGLKKPDDQSPYFKPRAWKISDEAASAFAMMLKGESGPFTQDQVKVGFEICQEGELLAGRLKIQPRMAFRLKNRHDANRSGTHSVKSLSGLDLSADVGTDIREFFQVPVMSGTSGTSSDVVIAARYAAMHAGLKWSAP…	2721	906
Psy0508_AvrA1a_1	Psy0508	AvrA	AvrA	AvrA	AvrA1	14	60	10	ATGTGGAACGTCAGTAAATCAAGCAACAACTTAGGCGCATATAAATTGCCCTTGGAAGCGCAAACGCCGCCTGAAAAAATTTCTCCTTTTGATGCCATGTCCGCAGCCCAACCCGAGGGCAAGGCGCCGCACGATCAGTTGCAAAACGATCAGTACCCTATCCAGCAAGCAGAAGACCGTGGCCGACACCTTGTCGAGCAAGCAGAAATCCAGGCGCATGTTCAGCATTGTCATTCAAAAGCTCCAGAAATAGGAGATGCAACAAAAACGCAATCTGTTTCCGAAAAACTTGGCACTGCTAAAAACTCATCATGTGATGCATCGCAAATTTTGATCGGCTCGAAAAATGATGACTTTCATAAAAATAAAGCAGGCTCTAATGGAGATATAAATAAATCT…	MWNVSKSSNNLGAYKLPLEAQTPPEKISPFDAMSAAQPEGKAPHDQLQNDQYPIQQAEDRGRHLVEQAEIQAHVQHCHSKAPEIGDATKTQSVSEKLGTAKNSSCDASQILIGSKNDDFHKNKAGSNGDINKSSDPSALRCSLSPAPRRVPKSKKSYGAATIGGKVYHPHEKTDSTIADFLSRSLSNNAYRSERHLRKRALAYLNHISAEKEITSNACFAMKDVNSFAHKQSEWLCHLERSLWRDEPALQFHDRQQLGNEVLGLKKPDDQSPYFKPRAWKISDEAASAFAMMLKGESGPFTQDQVKVGFEICQEGELLAGRLKIQPRMAFRLKNRHDANRSGTHSVKSLSGLDLSADVGTDIREFFQVPVMSGTSGTSSDVVIAARYAAMHAGLKWSAP…	2721	906
Psy0509_AvrA1a_1	Psy0509	AvrA	AvrA	AvrA	AvrA1	14	60	10	ATGTGGAACGTCAGTAAATCAAGCAACAACTTAGGCGCATATAAATTGCCCTTGGAAGCGCAAACGCCGCCTGAAAAAATTTCTCCTTTTGATGCCATGTCCGCAGCCCAACCCGAGGGCAAGGCGCCGCACGATCAGTTGCAAAACGATCAGTACCCTATCCAGCAAGCAGAAGACCGTGGCCGACACCTTGTCGAGCAAGCAGAAATCCAGGCGCATGTTCAGCATTGTCATTCAAAAGCTCCAGAAATAGGAGATGCAACAAAAACGCAATCTGTTTCCGAAAAACTTGGCACTGCTAAAAACTCATCATGTGATGCATCGCAAATTTTGATCGGCTCGAAAAATGATGACTTTCATAAAAATAAAGCAGGCTCTAATGGAGATATAAATAAATCT…	MWNVSKSSNNLGAYKLPLEAQTPPEKISPFDAMSAAQPEGKAPHDQLQNDQYPIQQAEDRGRHLVEQAEIQAHVQHCHSKAPEIGDATKTQSVSEKLGTAKNSSCDASQILIGSKNDDFHKNKAGSNGDINKSSDPSALRCSLSPAPRRVPKSKKSYGAATIGGKVYHPHEKTDSTIADFLSRSLSNNAYRSERHLRKRALAYLNHISAEKEITSNACFAMKDVNSFAHKQSEWLCHLERSLWRDEPALQFHDRQQLGNEVLGLKKPDDQSPYFKPRAWKISDEAASAFAMMLKGESGPFTQDQVKVGFEICQEGELLAGRLKIQPRMAFRLKNRHDANRSGTHSVKSLSGLDLSADVGTDIREFFQVPVMSGTSGTSSDVVIAARYAAMHAGLKWSAP…	2721	906
PumICMP3962_AvrA1a_1	PumICMP3962	AvrA	AvrA	AvrA	AvrA1	14	NA	11	ATGTGGAACGTCAGTAAATCAAGCAACAACTTAGGCGCGTATAAATTGCCTTTGGAAGCGCAAACGCCGCCTGAAAAAATTTGTCCTTTTGATGCCATGTCCGCAGCCCAACCCGAGGGCAAGGCGCCGCACGATCAGTTGCAAAACGATCAGTACCCTATCCAGCAAGCAGAAGACCGTGGCCGACACCTTGTCGAGCAAGCAGAAATCCAGGCGCATGTTCAGCATTGTCATTCAAAAGCTCCAGAAATAGGAGATGCAACAAAAACGCAATCTGTTTCCGAAAAACTTGGCACTGCTAAAAATTCATCATGTGATGCATCGCAAATTTCGATCGGCTCGAAAAATGATGACTTTCATAAAAATAAAGCAGGCTCTAATGGAGATATAAATAAATCT…	MWNVSKSSNNLGAYKLPLEAQTPPEKICPFDAMSAAQPEGKAPHDQLQNDQYPIQQAEDRGRHLVEQAEIQAHVQHCHSKAPEIGDATKTQSVSEKLGTAKNSSCDASQISIGSKNDDFHKNKAGSNGDINKSSAPSALRCSLSPAPRRVPKSKKSYGAATIGGKVYHPHEKTDSTIADFLSRSLSNNAYRSERHLRKRALAYLNHISAEKEIISNACFAMKDVNSFAHKQSEWLCHLERSLWRDEPALQFHDRQQLGNEVLGLKKPDDQSPYFKPRAWKISDEAASAFAMMLKGESGPFTQDQVKVGFEICQEGELLAGRLKIQPRMAFRLKNRHDANRSGTHSVKSLSGLDLSADVGTDIREFFQVPVMSGTSGTSSDVVIAARYAAMHAGLQWSAP…	2721	906
PviICMP3963_AvrA1a_1	PviICMP3963	AvrA	AvrA	AvrA	AvrA1	14	60	12	ATGTGGAACGTCAGTAAATCAAGCAACAACTTAGGCGCATATAAATTGCCCTTGGAAGCGCAAACGCCGCCTGAAAAAATTTCTCCTTTTGATGCCATGTCCGCAGCCCAACCCGAGGGCAAGGCGCCGCACGATCAGTTGCAAAACGATCAGTACCCTATCCAGCAAGCAGAAGACCGTGGCCGACACCTTGTCGAGCAAGCAGAAGTCCAGGCGCATGTTCAGCATTGTCATTCAAAAGCTCCAGAAATAGGAGATGCAACAAAAACGCAATCTGTTTCCGAAAAACTTGGCACTGCTAAAAATTCATCATGTGATGCATCGCAAATTGCGATCGGCTCGAAAAATGATGACTTTCATAAAAATAAAGCAGGCTCTAATGGAGATATAAATAAATCT…	MWNVSKSSNNLGAYKLPLEAQTPPEKISPFDAMSAAQPEGKAPHDQLQNDQYPIQQAEDRGRHLVEQAEVQAHVQHCHSKAPEIGDATKTQSVSEKLGTAKNSSCDASQIAIGSKNDDFHKNKAGSNGDINKSSDPSALRCSLSPAPRRVPKSKKSYGAATIGGKVYHPHEKTDSTIADFLSRSLSNNAYRSERHLRKRALAYLNHISAEKEIISNACFAMKDVNSFAHKQSEWLCHLERSLWRDEPALQFHDRQQLGNEVLGLKKPDDQSPYFKPRAWKVSDEAASAFAMMLKGESGPFTQDQVKVGFEICQEGELLAGRLKIQPRMAFRLKNRHDANRSGTHSVKSLSGLDLSADVGTDIREFFQVPVMSGTSGTSSDVVIAARYAAMHSGLQWSAP…	2721	906
Pcn3113_AvrB1a_1	Pcn3113	AvrB	AvrB	AvrB	AvrB1	15	73	13	ATGGGCTGCGTCTCGTCAAAAGGCAACCCAGTGCTTTCTCCGCAGGCTTCTTTTAATGACGCTTCTCGTACGTTTTTCAGAGCACTTCCCGGCCCAGCGGCAAGACAATTGCAGGTCTACGATCAATGCTTAATTGGTGCAGCGCGCTGGCCTGACGATTCCAGTAAGTCGAGCACTCCCGAAAATAGGGCGTATTGTCAGAGCATGTACAACTCAATTCGTTCTGCTGGAGGTGAAATTTCCAGTGGCAGGATCACGTCTTTTGATGAACTATGGGGGCGCGCAACTGAATGGCGACTTTCAAAGTTGCAGAGAGGAGCACCGTCCTATTCTGCGTTTGCCTCTGAAAGGACGTCCAATACAGACGCAGTAACCCCCTTAGTTAAACCTTATAAGTCT…	MGCVSSKGNPVLSPQASFNDASRTFFRALPGPAARQLQVYDQCLIGAARWPDDSSKSSTPENRAYCQSMYNSIRSAGGEISSGRITSFDELWGRATEWRLSKLQRGAPSYSAFASERTSNTDAVTPLVKPYKSVIARVVSHKDARDETMRDNLFGDLHVKAYRQTARLNGNIIPLNTFRVATDTAYLRGRVAQLRRELGAEAIEQHLRRYNPDRIDHTDAYYLPIIKNHLNNLYRRATSSDLRRADLIDLIARTHWWAASAMPDQRGSAAKAEFAARAIASAHGIELPPFRNGKVSDIEAMLSGEEEFVGKYVSLLDSDCF	966	321
PcnICMP4329_AvrB1a_1	PcnICMP4329	AvrB	AvrB	AvrB	AvrB1	15	73	13	ATGGGCTGCGTCTCGTCAAAAGGCAACCCAGTGCTTTCTCCGCAGGCTTCTTTTAATGACGCTTCTCGTACGTTTTTCAGAGCACTTCCCGGCCCAGCGGCAAGACAATTGCAGGTCTACGATCAATGCTTAATTGGTGCAGCGCGCTGGCCTGACGATTCCAGTAAGTCGAGCACTCCCGAAAATAGGGCGTATTGTCAGAGCATGTACAACTCAATTCGTTCTGCTGGAGGTGAAATTTCCAGTGGCAGGATCACGTCTTTTGATGAACTATGGGGGCGCGCAACTGAATGGCGACTTTCAAAGTTGCAGAGAGGAGCACCGTCCTATTCTGCGTTTGCCTCTGAAAGGACGTCCAATACAGACGCAGTAACCCCCTTAGTTAAACCTTATAAGTCT…	MGCVSSKGNPVLSPQASFNDASRTFFRALPGPAARQLQVYDQCLIGAARWPDDSSKSSTPENRAYCQSMYNSIRSAGGEISSGRITSFDELWGRATEWRLSKLQRGAPSYSAFASERTSNTDAVTPLVKPYKSVIARVVSHKDARDETMRDNLFGDLHVKAYRQTARLNGNIIPLNTFRVATDTAYLRGRVAQLRRELGAEAIEQHLRRYNPDRIDHTDAYYLPIIKNHLNNLYRRATSSDLRRADLIDLIARTHWWAASAMPDQRGSAAKAEFAARAIASAHGIELPPFRNGKVSDIEAMLSGEEEFVGKYVSLLDSDCF	966	321
PgcICMP3649_AvrB1a_1	PgcICMP3649	AvrB	AvrB	AvrB	AvrB1	15	73	13	ATGGGCTGCGTCTCGTCAAAAGGCAACCCAGTGCTTTCTCCGCAGGCTTCTTTTAATGACGCTTCTCGTACGTTTTTCAGAGCACTTCCCGGCCCAGCGGCAAGACAATTGCAGGTCTACGATCAATGCTTAATTGGTGCAGCGCGCTGGCCTGACGATTCCAGTAAGTCGAGCACTCCCGAAAATAGGGCGTATTGTCAGAGCATGTACAACTCAATTCGTTCTGCTGGAGGTGAAATTTCCAGTGGCAGGATCACGTCTTTTGATGAACTATGGGGGCGCGCAACTGAATGGCGACTTTCAAAGTTGCAGAGAGGAGCACCGTCCTATTCTGCGTTTGCCTCTGAAAGGACGTCCAATACAGACGCAGTAACCCCCTTAGTTAAACCTTATAAGTCT…	MGCVSSKGNPVLSPQASFNDASRTFFRALPGPAARQLQVYDQCLIGAARWPDDSSKSSTPENRAYCQSMYNSIRSAGGEISSGRITSFDELWGRATEWRLSKLQRGAPSYSAFASERTSNTDAVTPLVKPYKSVIARVVSHKDARDETMRDNLFGDLHVKAYRQTARLNGNIIPLNTFRVATDTAYLRGRVAQLRRELGAEAIEQHLRRYNPDRIDHTDAYYLPIIKNHLNNLYRRATSSDLRRADLIDLIARTHWWAASAMPDQRGSAAKAEFAARAIASAHGIELPPFRNGKVSDIEAMLSGEEEFVGKYVSLLDSDCF	966	321
PgcICMP4323_AvrB1a_1	PgcICMP4323	AvrB	AvrB	AvrB	AvrB1	15	73	13	ATGGGCTGCGTCTCGTCAAAAGGCAACCCAGTGCTTTCTCCGCAGGCTTCTTTTAATGACGCTTCTCGTACGTTTTTCAGAGCACTTCCCGGCCCAGCGGCAAGACAATTGCAGGTCTACGATCAATGCTTAATTGGTGCAGCGCGCTGGCCTGACGATTCCAGTAAGTCGAGCACTCCCGAAAATAGGGCGTATTGTCAGAGCATGTACAACTCAATTCGTTCTGCTGGAGGTGAAATTTCCAGTGGCAGGATCACGTCTTTTGATGAACTATGGGGGCGCGCAACTGAATGGCGACTTTCAAAGTTGCAGAGAGGAGCACCGTCCTATTCTGCGTTTGCCTCTGAAAGGACGTCCAATACAGACGCAGTAACCCCCTTAGTTAAACCTTATAAGTCT…	MGCVSSKGNPVLSPQASFNDASRTFFRALPGPAARQLQVYDQCLIGAARWPDDSSKSSTPENRAYCQSMYNSIRSAGGEISSGRITSFDELWGRATEWRLSKLQRGAPSYSAFASERTSNTDAVTPLVKPYKSVIARVVSHKDARDETMRDNLFGDLHVKAYRQTARLNGNIIPLNTFRVATDTAYLRGRVAQLRRELGAEAIEQHLRRYNPDRIDHTDAYYLPIIKNHLNNLYRRATSSDLRRADLIDLIARTHWWAASAMPDQRGSAAKAEFAARAIASAHGIELPPFRNGKVSDIEAMLSGEEEFVGKYVSLLDSDCF	966	321
PgcICMP4466_AvrB1a_1	PgcICMP4466	AvrB	AvrB	AvrB	AvrB1	15	73	13	ATGGGCTGCGTCTCGTCAAAAGGCAACCCAGTGCTTTCTCCGCAGGCTTCTTTTAATGACGCTTCTCGTACGTTTTTCAGAGCACTTCCCGGCCCAGCGGCAAGACAATTGCAGGTCTACGATCAATGCTTAATTGGTGCAGCGCGCTGGCCTGACGATTCCAGTAAGTCGAGCACTCCCGAAAATAGGGCGTATTGTCAGAGCATGTACAACTCAATTCGTTCTGCTGGAGGTGAAATTTCCAGTGGCAGGATCACGTCTTTTGATGAACTATGGGGGCGCGCAACTGAATGGCGACTTTCAAAGTTGCAGAGAGGAGCACCGTCCTATTCTGCGTTTGCCTCTGAAAGGACGTCCAATACAGACGCAGTAACCCCCTTAGTTAAACCTTATAAGTCT…	MGCVSSKGNPVLSPQASFNDASRTFFRALPGPAARQLQVYDQCLIGAARWPDDSSKSSTPENRAYCQSMYNSIRSAGGEISSGRITSFDELWGRATEWRLSKLQRGAPSYSAFASERTSNTDAVTPLVKPYKSVIARVVSHKDARDETMRDNLFGDLHVKAYRQTARLNGNIIPLNTFRVATDTAYLRGRVAQLRRELGAEAIEQHLRRYNPDRIDHTDAYYLPIIKNHLNNLYRRATSSDLRRADLIDLIARTHWWAASAMPDQRGSAAKAEFAARAIASAHGIELPPFRNGKVSDIEAMLSGEEEFVGKYVSLLDSDCF	966	321
PgcICMP5019_AvrB1a_1	PgcICMP5019	AvrB	AvrB	AvrB	AvrB1	15	73	13	ATGGGCTGCGTCTCGTCAAAAGGCAACCCAGTGCTTTCTCCGCAGGCTTCTTTTAATGACGCTTCTCGTACGTTTTTCAGAGCACTTCCCGGCCCAGCGGCAAGACAATTGCAGGTCTACGATCAATGCTTAATTGGTGCAGCGCGCTGGCCTGACGATTCCAGTAAGTCGAGCACTCCCGAAAATAGGGCGTATTGTCAGAGCATGTACAACTCAATTCGTTCTGCTGGAGGTGAAATTTCCAGTGGCAGGATCACGTCTTTTGATGAACTATGGGGGCGCGCAACTGAATGGCGACTTTCAAAGTTGCAGAGAGGAGCACCGTCCTATTCTGCGTTTGCCTCTGAAAGGACGTCCAATACAGACGCAGTAACCCCCTTAGTTAAACCTTATAAGTCT…	MGCVSSKGNPVLSPQASFNDASRTFFRALPGPAARQLQVYDQCLIGAARWPDDSSKSSTPENRAYCQSMYNSIRSAGGEISSGRITSFDELWGRATEWRLSKLQRGAPSYSAFASERTSNTDAVTPLVKPYKSVIARVVSHKDARDETMRDNLFGDLHVKAYRQTARLNGNIIPLNTFRVATDTAYLRGRVAQLRRELGAEAIEQHLRRYNPDRIDHTDAYYLPIIKNHLNNLYRRATSSDLRRADLIDLIARTHWWAASAMPDQRGSAAKAEFAARAIASAHGIELPPFRNGKVSDIEAMLSGEEEFVGKYVSLLDSDCF	966	321
Por36_1_AvrB1a_1	Por36_1	AvrB	AvrB	AvrB	AvrB1	15	73	13	ATGGGCTGCGTCTCGTCAAAAGGCAACCCAGTGCTTTCTCCGCAGGCTTCTTTTAATGACGCTTCTCGTACGTTTTTCAGAGCACTTCCCGGCCCAGCGGCAAGACAATTGCAGGTCTACGATCAATGCTTAATTGGTGCAGCGCGCTGGCCTGACGATTCCAGTAAGTCGAGCACTCCCGAAAATAGGGCGTATTGTCAGAGCATGTACAACTCAATTCGTTCTGCTGGAGGTGAAATTTCCAGTGGCAGGATCACGTCTTTTGATGAACTATGGGGGCGCGCAACTGAATGGCGACTTTCAAAGTTGCAGAGAGGAGCACCGTCCTATTCTGCGTTTGCCTCTGAAAGGACGTCCAATACAGACGCAGTAACCCCCTTAGTTAAACCTTATAAGTCT…	MGCVSSKGNPVLSPQASFNDASRTFFRALPGPAARQLQVYDQCLIGAARWPDDSSKSSTPENRAYCQSMYNSIRSAGGEISSGRITSFDELWGRATEWRLSKLQRGAPSYSAFASERTSNTDAVTPLVKPYKSVIARVVSHKDARDETMRDNLFGDLHVKAYRQTARLNGNIIPLNTFRVATDTAYLRGRVAQLRRELGAEAIEQHLRRYNPDRIDHTDAYYLPIIKNHLNNLYRRATSSDLRRADLIDLIARTHWWAASAMPDQRGSAAKAEFAARAIASAHGIELPPFRNGKVSDIEAMLSGEEEFVGKYVSLLDSDCF	966	321
PorICMP9088_AvrB1a_1	PorICMP9088	AvrB	AvrB	AvrB	AvrB1	15	73	13	ATGGGCTGCGTCTCGTCAAAAGGCAACCCAGTGCTTTCTCCGCAGGCTTCTTTTAATGACGCTTCTCGTACGTTTTTCAGAGCACTTCCCGGCCCAGCGGCAAGACAATTGCAGGTCTACGATCAATGCTTAATTGGTGCAGCGCGCTGGCCTGACGATTCCAGTAAGTCGAGCACTCCCGAAAATAGGGCGTATTGTCAGAGCATGTACAACTCAATTCGTTCTGCTGGAGGTGAAATTTCCAGTGGCAGGATCACGTCTTTTGATGAACTATGGGGGCGCGCAACTGAATGGCGACTTTCAAAGTTGCAGAGAGGAGCACCGTCCTATTCTGCGTTTGCCTCTGAAAGGACGTCCAATACAGACGCAGTAACCCCCTTAGTTAAACCTTATAAGTCT…	MGCVSSKGNPVLSPQASFNDASRTFFRALPGPAARQLQVYDQCLIGAARWPDDSSKSSTPENRAYCQSMYNSIRSAGGEISSGRITSFDELWGRATEWRLSKLQRGAPSYSAFASERTSNTDAVTPLVKPYKSVIARVVSHKDARDETMRDNLFGDLHVKAYRQTARLNGNIIPLNTFRVATDTAYLRGRVAQLRRELGAEAIEQHLRRYNPDRIDHTDAYYLPIIKNHLNNLYRRATSSDLRRADLIDLIARTHWWAASAMPDQRGSAAKAEFAARAIASAHGIELPPFRNGKVSDIEAMLSGEEEFVGKYVSLLDSDCF	966	321
PorICMP9091_AvrB1a_1	PorICMP9091	AvrB	AvrB	AvrB	AvrB1	15	73	13	ATGGGCTGCGTCTCGTCAAAAGGCAACCCAGTGCTTTCTCCGCAGGCTTCTTTTAATGACGCTTCTCGTACGTTTTTCAGAGCACTTCCCGGCCCAGCGGCAAGACAATTGCAGGTCTACGATCAATGCTTAATTGGTGCAGCGCGCTGGCCTGACGATTCCAGTAAGTCGAGCACTCCCGAAAATAGGGCGTATTGTCAGAGCATGTACAACTCAATTCGTTCTGCTGGAGGTGAAATTTCCAGTGGCAGGATCACGTCTTTTGATGAACTATGGGGGCGCGCAACTGAATGGCGACTTTCAAAGTTGCAGAGAGGAGCACCGTCCTATTCTGCGTTTGCCTCTGAAAGGACGTCCAATACAGACGCAGTAACCCCCTTAGTTAAACCTTATAAGTCT…	MGCVSSKGNPVLSPQASFNDASRTFFRALPGPAARQLQVYDQCLIGAARWPDDSSKSSTPENRAYCQSMYNSIRSAGGEISSGRITSFDELWGRATEWRLSKLQRGAPSYSAFASERTSNTDAVTPLVKPYKSVIARVVSHKDARDETMRDNLFGDLHVKAYRQTARLNGNIIPLNTFRVATDTAYLRGRVAQLRRELGAEAIEQHLRRYNPDRIDHTDAYYLPIIKNHLNNLYRRATSSDLRRADLIDLIARTHWWAASAMPDQRGSAAKAEFAARAIASAHGIELPPFRNGKVSDIEAMLSGEEEFVGKYVSLLDSDCF	966	321
PsfICMP4418_AvrB1a_1	PsfICMP4418	AvrB	AvrB	AvrB	AvrB1	15	73	13	ATGGGCTGCGTCTCGTCAAAAGGCAACCCAGTGCTTTCTCCGCAGGCTTCTTTTAATGACGCTTCTCGTACGTTTTTCAGAGCACTTCCCGGCCCAGCGGCAAGACAATTGCAGGTCTACGATCAATGCTTAATTGGTGCAGCGCGCTGGCCTGACGATTCCAGTAAGTCGAGCACTCCCGAAAATAGGGCGTATTGTCAGAGCATGTACAACTCAATTCGTTCTGCTGGAGGTGAAATTTCCAGTGGCAGGATCACGTCTTTTGATGAACTATGGGGGCGCGCAACTGAATGGCGACTTTCAAAGTTGCAGAGAGGAGCACCGTCCTATTCTGCGTTTGCCTCTGAAAGGACGTCCAATACAGACGCAGTAACCCCCTTAGTTAAACCTTATAAGTCT…	MGCVSSKGNPVLSPQASFNDASRTFFRALPGPAARQLQVYDQCLIGAARWPDDSSKSSTPENRAYCQSMYNSIRSAGGEISSGRITSFDELWGRATEWRLSKLQRGAPSYSAFASERTSNTDAVTPLVKPYKSVIARVVSHKDARDETMRDNLFGDLHVKAYRQTARLNGNIIPLNTFRVATDTAYLRGRVAQLRRELGAEAIEQHLRRYNPDRIDHTDAYYLPIIKNHLNNLYRRATSSDLRRADLIDLIARTHWWAASAMPDQRGSAAKAEFAARAIASAHGIELPPFRNGKVSDIEAMLSGEEEFVGKYVSLLDSDCF	966	321
Psg150_AvrB1a_1	Psg150	AvrB	AvrB	AvrB	AvrB1	15	73	13	ATGGGCTGCGTCTCGTCAAAAGGCAACCCAGTGCTTTCTCCGCAGGCTTCTTTTAATGACGCTTCTCGTACGTTTTTCAGAGCACTTCCCGGCCCAGCGGCAAGACAATTGCAGGTCTACGATCAATGCTTAATTGGTGCAGCGCGCTGGCCTGACGATTCCAGTAAGTCGAGCACTCCCGAAAATAGGGCGTATTGTCAGAGCATGTACAACTCAATTCGTTCTGCTGGAGGTGAAATTTCCAGTGGCAGGATCACGTCTTTTGATGAACTATGGGGGCGCGCAACTGAATGGCGACTTTCAAAGTTGCAGAGAGGAGCACCGTCCTATTCTGCGTTTGCCTCTGAAAGGACGTCCAATACAGACGCAGTAACCCCCTTAGTTAAACCTTATAAGTCT…	MGCVSSKGNPVLSPQASFNDASRTFFRALPGPAARQLQVYDQCLIGAARWPDDSSKSSTPENRAYCQSMYNSIRSAGGEISSGRITSFDELWGRATEWRLSKLQRGAPSYSAFASERTSNTDAVTPLVKPYKSVIARVVSHKDARDETMRDNLFGDLHVKAYRQTARLNGNIIPLNTFRVATDTAYLRGRVAQLRRELGAEAIEQHLRRYNPDRIDHTDAYYLPIIKNHLNNLYRRATSSDLRRADLIDLIARTHWWAASAMPDQRGSAAKAEFAARAIASAHGIELPPFRNGKVSDIEAMLSGEEEFVGKYVSLLDSDCF	966	321
Psy0432_AvrB1a_1	Psy0432	AvrB	AvrB	AvrB	AvrB1	15	73	13	ATGGGCTGCGTCTCGTCAAAAGGCAACCCAGTGCTTTCTCCGCAGGCTTCTTTTAATGACGCTTCTCGTACGTTTTTCAGAGCACTTCCCGGCCCAGCGGCAAGACAATTGCAGGTCTACGATCAATGCTTAATTGGTGCAGCGCGCTGGCCTGACGATTCCAGTAAGTCGAGCACTCCCGAAAATAGGGCGTATTGTCAGAGCATGTACAACTCAATTCGTTCTGCTGGAGGTGAAATTTCCAGTGGCAGGATCACGTCTTTTGATGAACTATGGGGGCGCGCAACTGAATGGCGACTTTCAAAGTTGCAGAGAGGAGCACCGTCCTATTCTGCGTTTGCCTCTGAAAGGACGTCCAATACAGACGCAGTAACCCCCTTAGTTAAACCTTATAAGTCT…	MGCVSSKGNPVLSPQASFNDASRTFFRALPGPAARQLQVYDQCLIGAARWPDDSSKSSTPENRAYCQSMYNSIRSAGGEISSGRITSFDELWGRATEWRLSKLQRGAPSYSAFASERTSNTDAVTPLVKPYKSVIARVVSHKDARDETMRDNLFGDLHVKAYRQTARLNGNIIPLNTFRVATDTAYLRGRVAQLRRELGAEAIEQHLRRYNPDRIDHTDAYYLPIIKNHLNNLYRRATSSDLRRADLIDLIARTHWWAASAMPDQRGSAAKAEFAARAIASAHGIELPPFRNGKVSDIEAMLSGEEEFVGKYVSLLDSDCF	966	321
Psy0433_AvrB1a_1	Psy0433	AvrB	AvrB	AvrB	AvrB1	15	73	13	ATGGGCTGCGTCTCGTCAAAAGGCAACCCAGTGCTTTCTCCGCAGGCTTCTTTTAATGACGCTTCTCGTACGTTTTTCAGAGCACTTCCCGGCCCAGCGGCAAGACAATTGCAGGTCTACGATCAATGCTTAATTGGTGCAGCGCGCTGGCCTGACGATTCCAGTAAGTCGAGCACTCCCGAAAATAGGGCGTATTGTCAGAGCATGTACAACTCAATTCGTTCTGCTGGAGGTGAAATTTCCAGTGGCAGGATCACGTCTTTTGATGAACTATGGGGGCGCGCAACTGAATGGCGACTTTCAAAGTTGCAGAGAGGAGCACCGTCCTATTCTGCGTTTGCCTCTGAAAGGACGTCCAATACAGACGCAGTAACCCCCTTAGTTAAACCTTATAAGTCT…	MGCVSSKGNPVLSPQASFNDASRTFFRALPGPAARQLQVYDQCLIGAARWPDDSSKSSTPENRAYCQSMYNSIRSAGGEISSGRITSFDELWGRATEWRLSKLQRGAPSYSAFASERTSNTDAVTPLVKPYKSVIARVVSHKDARDETMRDNLFGDLHVKAYRQTARLNGNIIPLNTFRVATDTAYLRGRVAQLRRELGAEAIEQHLRRYNPDRIDHTDAYYLPIIKNHLNNLYRRATSSDLRRADLIDLIARTHWWAASAMPDQRGSAAKAEFAARAIASAHGIELPPFRNGKVSDIEAMLSGEEEFVGKYVSLLDSDCF	966	321
Psy0434_AvrB1a_1	Psy0434	AvrB	AvrB	AvrB	AvrB1	15	73	13	ATGGGCTGCGTCTCGTCAAAAGGCAACCCAGTGCTTTCTCCGCAGGCTTCTTTTAATGACGCTTCTCGTACGTTTTTCAGAGCACTTCCCGGCCCAGCGGCAAGACAATTGCAGGTCTACGATCAATGCTTAATTGGTGCAGCGCGCTGGCCTGACGATTCCAGTAAGTCGAGCACTCCCGAAAATAGGGCGTATTGTCAGAGCATGTACAACTCAATTCGTTCTGCTGGAGGTGAAATTTCCAGTGGCAGGATCACGTCTTTTGATGAACTATGGGGGCGCGCAACTGAATGGCGACTTTCAAAGTTGCAGAGAGGAGCACCGTCCTATTCTGCGTTTGCCTCTGAAAGGACGTCCAATACAGACGCAGTAACCCCCTTAGTTAAACCTTATAAGTCT…	MGCVSSKGNPVLSPQASFNDASRTFFRALPGPAARQLQVYDQCLIGAARWPDDSSKSSTPENRAYCQSMYNSIRSAGGEISSGRITSFDELWGRATEWRLSKLQRGAPSYSAFASERTSNTDAVTPLVKPYKSVIARVVSHKDARDETMRDNLFGDLHVKAYRQTARLNGNIIPLNTFRVATDTAYLRGRVAQLRRELGAEAIEQHLRRYNPDRIDHTDAYYLPIIKNHLNNLYRRATSSDLRRADLIDLIARTHWWAASAMPDQRGSAAKAEFAARAIASAHGIELPPFRNGKVSDIEAMLSGEEEFVGKYVSLLDSDCF	966	321
Psy0435_AvrB1a_1	Psy0435	AvrB	AvrB	AvrB	AvrB1	15	73	13	ATGGGCTGCGTCTCGTCAAAAGGCAACCCAGTGCTTTCTCCGCAGGCTTCTTTTAATGACGCTTCTCGTACGTTTTTCAGAGCACTTCCCGGCCCAGCGGCAAGACAATTGCAGGTCTACGATCAATGCTTAATTGGTGCAGCGCGCTGGCCTGACGATTCCAGTAAGTCGAGCACTCCCGAAAATAGGGCGTATTGTCAGAGCATGTACAACTCAATTCGTTCTGCTGGAGGTGAAATTTCCAGTGGCAGGATCACGTCTTTTGATGAACTATGGGGGCGCGCAACTGAATGGCGACTTTCAAAGTTGCAGAGAGGAGCACCGTCCTATTCTGCGTTTGCCTCTGAAAGGACGTCCAATACAGACGCAGTAACCCCCTTAGTTAAACCTTATAAGTCT…	MGCVSSKGNPVLSPQASFNDASRTFFRALPGPAARQLQVYDQCLIGAARWPDDSSKSSTPENRAYCQSMYNSIRSAGGEISSGRITSFDELWGRATEWRLSKLQRGAPSYSAFASERTSNTDAVTPLVKPYKSVIARVVSHKDARDETMRDNLFGDLHVKAYRQTARLNGNIIPLNTFRVATDTAYLRGRVAQLRRELGAEAIEQHLRRYNPDRIDHTDAYYLPIIKNHLNNLYRRATSSDLRRADLIDLIARTHWWAASAMPDQRGSAAKAEFAARAIASAHGIELPPFRNGKVSDIEAMLSGEEEFVGKYVSLLDSDCF	966	321
Psy0436_AvrB1a_1	Psy0436	AvrB	AvrB	AvrB	AvrB1	15	73	13	ATGGGCTGCGTCTCGTCAAAAGGCAACCCAGTGCTTTCTCCGCAGGCTTCTTTTAATGACGCTTCTCGTACGTTTTTCAGAGCACTTCCCGGCCCAGCGGCAAGACAATTGCAGGTCTACGATCAATGCTTAATTGGTGCAGCGCGCTGGCCTGACGATTCCAGTAAGTCGAGCACTCCCGAAAATAGGGCGTATTGTCAGAGCATGTACAACTCAATTCGTTCTGCTGGAGGTGAAATTTCCAGTGGCAGGATCACGTCTTTTGATGAACTATGGGGGCGCGCAACTGAATGGCGACTTTCAAAGTTGCAGAGAGGAGCACCGTCCTATTCTGCGTTTGCCTCTGAAAGGACGTCCAATACAGACGCAGTAACCCCCTTAGTTAAACCTTATAAGTCT…	MGCVSSKGNPVLSPQASFNDASRTFFRALPGPAARQLQVYDQCLIGAARWPDDSSKSSTPENRAYCQSMYNSIRSAGGEISSGRITSFDELWGRATEWRLSKLQRGAPSYSAFASERTSNTDAVTPLVKPYKSVIARVVSHKDARDETMRDNLFGDLHVKAYRQTARLNGNIIPLNTFRVATDTAYLRGRVAQLRRELGAEAIEQHLRRYNPDRIDHTDAYYLPIIKNHLNNLYRRATSSDLRRADLIDLIARTHWWAASAMPDQRGSAAKAEFAARAIASAHGIELPPFRNGKVSDIEAMLSGEEEFVGKYVSLLDSDCF	966	321
Psy0437_AvrB1a_1	Psy0437	AvrB	AvrB	AvrB	AvrB1	15	73	13	ATGGGCTGCGTCTCGTCAAAAGGCAACCCAGTGCTTTCTCCGCAGGCTTCTTTTAATGACGCTTCTCGTACGTTTTTCAGAGCACTTCCCGGCCCAGCGGCAAGACAATTGCAGGTCTACGATCAATGCTTAATTGGTGCAGCGCGCTGGCCTGACGATTCCAGTAAGTCGAGCACTCCCGAAAATAGGGCGTATTGTCAGAGCATGTACAACTCAATTCGTTCTGCTGGAGGTGAAATTTCCAGTGGCAGGATCACGTCTTTTGATGAACTATGGGGGCGCGCAACTGAATGGCGACTTTCAAAGTTGCAGAGAGGAGCACCGTCCTATTCTGCGTTTGCCTCTGAAAGGACGTCCAATACAGACGCAGTAACCCCCTTAGTTAAACCTTATAAGTCT…	MGCVSSKGNPVLSPQASFNDASRTFFRALPGPAARQLQVYDQCLIGAARWPDDSSKSSTPENRAYCQSMYNSIRSAGGEISSGRITSFDELWGRATEWRLSKLQRGAPSYSAFASERTSNTDAVTPLVKPYKSVIARVVSHKDARDETMRDNLFGDLHVKAYRQTARLNGNIIPLNTFRVATDTAYLRGRVAQLRRELGAEAIEQHLRRYNPDRIDHTDAYYLPIIKNHLNNLYRRATSSDLRRADLIDLIARTHWWAASAMPDQRGSAAKAEFAARAIASAHGIELPPFRNGKVSDIEAMLSGEEEFVGKYVSLLDSDCF	966	321
Psy0438_AvrB1a_1	Psy0438	AvrB	AvrB	AvrB	AvrB1	15	73	13	ATGGGCTGCGTCTCGTCAAAAGGCAACCCAGTGCTTTCTCCGCAGGCTTCTTTTAATGACGCTTCTCGTACGTTTTTCAGAGCACTTCCCGGCCCAGCGGCAAGACAATTGCAGGTCTACGATCAATGCTTAATTGGTGCAGCGCGCTGGCCTGACGATTCCAGTAAGTCGAGCACTCCCGAAAATAGGGCGTATTGTCAGAGCATGTACAACTCAATTCGTTCTGCTGGAGGTGAAATTTCCAGTGGCAGGATCACGTCTTTTGATGAACTATGGGGGCGCGCAACTGAATGGCGACTTTCAAAGTTGCAGAGAGGAGCACCGTCCTATTCTGCGTTTGCCTCTGAAAGGACGTCCAATACAGACGCAGTAACCCCCTTAGTTAAACCTTATAAGTCT…	MGCVSSKGNPVLSPQASFNDASRTFFRALPGPAARQLQVYDQCLIGAARWPDDSSKSSTPENRAYCQSMYNSIRSAGGEISSGRITSFDELWGRATEWRLSKLQRGAPSYSAFASERTSNTDAVTPLVKPYKSVIARVVSHKDARDETMRDNLFGDLHVKAYRQTARLNGNIIPLNTFRVATDTAYLRGRVAQLRRELGAEAIEQHLRRYNPDRIDHTDAYYLPIIKNHLNNLYRRATSSDLRRADLIDLIARTHWWAASAMPDQRGSAAKAEFAARAIASAHGIELPPFRNGKVSDIEAMLSGEEEFVGKYVSLLDSDCF	966	321
Psy0441_AvrB1a_1	Psy0441	AvrB	AvrB	AvrB	AvrB1	15	73	13	ATGGGCTGCGTCTCGTCAAAAGGCAACCCAGTGCTTTCTCCGCAGGCTTCTTTTAATGACGCTTCTCGTACGTTTTTCAGAGCACTTCCCGGCCCAGCGGCAAGACAATTGCAGGTCTACGATCAATGCTTAATTGGTGCAGCGCGCTGGCCTGACGATTCCAGTAAGTCGAGCACTCCCGAAAATAGGGCGTATTGTCAGAGCATGTACAACTCAATTCGTTCTGCTGGAGGTGAAATTTCCAGTGGCAGGATCACGTCTTTTGATGAACTATGGGGGCGCGCAACTGAATGGCGACTTTCAAAGTTGCAGAGAGGAGCACCGTCCTATTCTGCGTTTGCCTCTGAAAGGACGTCCAATACAGACGCAGTAACCCCCTTAGTTAAACCTTATAAGTCT…	MGCVSSKGNPVLSPQASFNDASRTFFRALPGPAARQLQVYDQCLIGAARWPDDSSKSSTPENRAYCQSMYNSIRSAGGEISSGRITSFDELWGRATEWRLSKLQRGAPSYSAFASERTSNTDAVTPLVKPYKSVIARVVSHKDARDETMRDNLFGDLHVKAYRQTARLNGNIIPLNTFRVATDTAYLRGRVAQLRRELGAEAIEQHLRRYNPDRIDHTDAYYLPIIKNHLNNLYRRATSSDLRRADLIDLIARTHWWAASAMPDQRGSAAKAEFAARAIASAHGIELPPFRNGKVSDIEAMLSGEEEFVGKYVSLLDSDCF	966	321
Psy0442_AvrB1a_1	Psy0442	AvrB	AvrB	AvrB	AvrB1	15	73	13	ATGGGCTGCGTCTCGTCAAAAGGCAACCCAGTGCTTTCTCCGCAGGCTTCTTTTAATGACGCTTCTCGTACGTTTTTCAGAGCACTTCCCGGCCCAGCGGCAAGACAATTGCAGGTCTACGATCAATGCTTAATTGGTGCAGCGCGCTGGCCTGACGATTCCAGTAAGTCGAGCACTCCCGAAAATAGGGCGTATTGTCAGAGCATGTACAACTCAATTCGTTCTGCTGGAGGTGAAATTTCCAGTGGCAGGATCACGTCTTTTGATGAACTATGGGGGCGCGCAACTGAATGGCGACTTTCAAAGTTGCAGAGAGGAGCACCGTCCTATTCTGCGTTTGCCTCTGAAAGGACGTCCAATACAGACGCAGTAACCCCCTTAGTTAAACCTTATAAGTCT…	MGCVSSKGNPVLSPQASFNDASRTFFRALPGPAARQLQVYDQCLIGAARWPDDSSKSSTPENRAYCQSMYNSIRSAGGEISSGRITSFDELWGRATEWRLSKLQRGAPSYSAFASERTSNTDAVTPLVKPYKSVIARVVSHKDARDETMRDNLFGDLHVKAYRQTARLNGNIIPLNTFRVATDTAYLRGRVAQLRRELGAEAIEQHLRRYNPDRIDHTDAYYLPIIKNHLNNLYRRATSSDLRRADLIDLIARTHWWAASAMPDQRGSAAKAEFAARAIASAHGIELPPFRNGKVSDIEAMLSGEEEFVGKYVSLLDSDCF	966	321
Psy0443_AvrB1a_1	Psy0443	AvrB	AvrB	AvrB	AvrB1	15	73	13	ATGGGCTGCGTCTCGTCAAAAGGCAACCCAGTGCTTTCTCCGCAGGCTTCTTTTAATGACGCTTCTCGTACGTTTTTCAGAGCACTTCCCGGCCCAGCGGCAAGACAATTGCAGGTCTACGATCAATGCTTAATTGGTGCAGCGCGCTGGCCTGACGATTCCAGTAAGTCGAGCACTCCCGAAAATAGGGCGTATTGTCAGAGCATGTACAACTCAATTCGTTCTGCTGGAGGTGAAATTTCCAGTGGCAGGATCACGTCTTTTGATGAACTATGGGGGCGCGCAACTGAATGGCGACTTTCAAAGTTGCAGAGAGGAGCACCGTCCTATTCTGCGTTTGCCTCTGAAAGGACGTCCAATACAGACGCAGTAACCCCCTTAGTTAAACCTTATAAGTCT…	MGCVSSKGNPVLSPQASFNDASRTFFRALPGPAARQLQVYDQCLIGAARWPDDSSKSSTPENRAYCQSMYNSIRSAGGEISSGRITSFDELWGRATEWRLSKLQRGAPSYSAFASERTSNTDAVTPLVKPYKSVIARVVSHKDARDETMRDNLFGDLHVKAYRQTARLNGNIIPLNTFRVATDTAYLRGRVAQLRRELGAEAIEQHLRRYNPDRIDHTDAYYLPIIKNHLNNLYRRATSSDLRRADLIDLIARTHWWAASAMPDQRGSAAKAEFAARAIASAHGIELPPFRNGKVSDIEAMLSGEEEFVGKYVSLLDSDCF	966	321
Psy0445_AvrB1a_1	Psy0445	AvrB	AvrB	AvrB	AvrB1	15	73	13	ATGGGCTGCGTCTCGTCAAAAGGCAACCCAGTGCTTTCTCCGCAGGCTTCTTTTAATGACGCTTCTCGTACGTTTTTCAGAGCACTTCCCGGCCCAGCGGCAAGACAATTGCAGGTCTACGATCAATGCTTAATTGGTGCAGCGCGCTGGCCTGACGATTCCAGTAAGTCGAGCACTCCCGAAAATAGGGCGTATTGTCAGAGCATGTACAACTCAATTCGTTCTGCTGGAGGTGAAATTTCCAGTGGCAGGATCACGTCTTTTGATGAACTATGGGGGCGCGCAACTGAATGGCGACTTTCAAAGTTGCAGAGAGGAGCACCGTCCTATTCTGCGTTTGCCTCTGAAAGGACGTCCAATACAGACGCAGTAACCCCCTTAGTTAAACCTTATAAGTCT…	MGCVSSKGNPVLSPQASFNDASRTFFRALPGPAARQLQVYDQCLIGAARWPDDSSKSSTPENRAYCQSMYNSIRSAGGEISSGRITSFDELWGRATEWRLSKLQRGAPSYSAFASERTSNTDAVTPLVKPYKSVIARVVSHKDARDETMRDNLFGDLHVKAYRQTARLNGNIIPLNTFRVATDTAYLRGRVAQLRRELGAEAIEQHLRRYNPDRIDHTDAYYLPIIKNHLNNLYRRATSSDLRRADLIDLIARTHWWAASAMPDQRGSAAKAEFAARAIASAHGIELPPFRNGKVSDIEAMLSGEEEFVGKYVSLLDSDCF	966	321
Psy0446_AvrB1a_1	Psy0446	AvrB	AvrB	AvrB	AvrB1	15	73	13	ATGGGCTGCGTCTCGTCAAAAGGCAACCCAGTGCTTTCTCCGCAGGCTTCTTTTAATGACGCTTCTCGTACGTTTTTCAGAGCACTTCCCGGCCCAGCGGCAAGACAATTGCAGGTCTACGATCAATGCTTAATTGGTGCAGCGCGCTGGCCTGACGATTCCAGTAAGTCGAGCACTCCCGAAAATAGGGCGTATTGTCAGAGCATGTACAACTCAATTCGTTCTGCTGGAGGTGAAATTTCCAGTGGCAGGATCACGTCTTTTGATGAACTATGGGGGCGCGCAACTGAATGGCGACTTTCAAAGTTGCAGAGAGGAGCACCGTCCTATTCTGCGTTTGCCTCTGAAAGGACGTCCAATACAGACGCAGTAACCCCCTTAGTTAAACCTTATAAGTCT…	MGCVSSKGNPVLSPQASFNDASRTFFRALPGPAARQLQVYDQCLIGAARWPDDSSKSSTPENRAYCQSMYNSIRSAGGEISSGRITSFDELWGRATEWRLSKLQRGAPSYSAFASERTSNTDAVTPLVKPYKSVIARVVSHKDARDETMRDNLFGDLHVKAYRQTARLNGNIIPLNTFRVATDTAYLRGRVAQLRRELGAEAIEQHLRRYNPDRIDHTDAYYLPIIKNHLNNLYRRATSSDLRRADLIDLIARTHWWAASAMPDQRGSAAKAEFAARAIASAHGIELPPFRNGKVSDIEAMLSGEEEFVGKYVSLLDSDCF	966	321
Psy0447_AvrB1a_1	Psy0447	AvrB	AvrB	AvrB	AvrB1	15	73	13	ATGGGCTGCGTCTCGTCAAAAGGCAACCCAGTGCTTTCTCCGCAGGCTTCTTTTAATGACGCTTCTCGTACGTTTTTCAGAGCACTTCCCGGCCCAGCGGCAAGACAATTGCAGGTCTACGATCAATGCTTAATTGGTGCAGCGCGCTGGCCTGACGATTCCAGTAAGTCGAGCACTCCCGAAAATAGGGCGTATTGTCAGAGCATGTACAACTCAATTCGTTCTGCTGGAGGTGAAATTTCCAGTGGCAGGATCACGTCTTTTGATGAACTATGGGGGCGCGCAACTGAATGGCGACTTTCAAAGTTGCAGAGAGGAGCACCGTCCTATTCTGCGTTTGCCTCTGAAAGGACGTCCAATACAGACGCAGTAACCCCCTTAGTTAAACCTTATAAGTCT…	MGCVSSKGNPVLSPQASFNDASRTFFRALPGPAARQLQVYDQCLIGAARWPDDSSKSSTPENRAYCQSMYNSIRSAGGEISSGRITSFDELWGRATEWRLSKLQRGAPSYSAFASERTSNTDAVTPLVKPYKSVIARVVSHKDARDETMRDNLFGDLHVKAYRQTARLNGNIIPLNTFRVATDTAYLRGRVAQLRRELGAEAIEQHLRRYNPDRIDHTDAYYLPIIKNHLNNLYRRATSSDLRRADLIDLIARTHWWAASAMPDQRGSAAKAEFAARAIASAHGIELPPFRNGKVSDIEAMLSGEEEFVGKYVSLLDSDCF	966	321
Psy0448_AvrB1a_1	Psy0448	AvrB	AvrB	AvrB	AvrB1	15	73	13	ATGGGCTGCGTCTCGTCAAAAGGCAACCCAGTGCTTTCTCCGCAGGCTTCTTTTAATGACGCTTCTCGTACGTTTTTCAGAGCACTTCCCGGCCCAGCGGCAAGACAATTGCAGGTCTACGATCAATGCTTAATTGGTGCAGCGCGCTGGCCTGACGATTCCAGTAAGTCGAGCACTCCCGAAAATAGGGCGTATTGTCAGAGCATGTACAACTCAATTCGTTCTGCTGGAGGTGAAATTTCCAGTGGCAGGATCACGTCTTTTGATGAACTATGGGGGCGCGCAACTGAATGGCGACTTTCAAAGTTGCAGAGAGGAGCACCGTCCTATTCTGCGTTTGCCTCTGAAAGGACGTCCAATACAGACGCAGTAACCCCCTTAGTTAAACCTTATAAGTCT…	MGCVSSKGNPVLSPQASFNDASRTFFRALPGPAARQLQVYDQCLIGAARWPDDSSKSSTPENRAYCQSMYNSIRSAGGEISSGRITSFDELWGRATEWRLSKLQRGAPSYSAFASERTSNTDAVTPLVKPYKSVIARVVSHKDARDETMRDNLFGDLHVKAYRQTARLNGNIIPLNTFRVATDTAYLRGRVAQLRRELGAEAIEQHLRRYNPDRIDHTDAYYLPIIKNHLNNLYRRATSSDLRRADLIDLIARTHWWAASAMPDQRGSAAKAEFAARAIASAHGIELPPFRNGKVSDIEAMLSGEEEFVGKYVSLLDSDCF	966	321
Psy0450_AvrB1a_1	Psy0450	AvrB	AvrB	AvrB	AvrB1	15	73	13	ATGGGCTGCGTCTCGTCAAAAGGCAACCCAGTGCTTTCTCCGCAGGCTTCTTTTAATGACGCTTCTCGTACGTTTTTCAGAGCACTTCCCGGCCCAGCGGCAAGACAATTGCAGGTCTACGATCAATGCTTAATTGGTGCAGCGCGCTGGCCTGACGATTCCAGTAAGTCGAGCACTCCCGAAAATAGGGCGTATTGTCAGAGCATGTACAACTCAATTCGTTCTGCTGGAGGTGAAATTTCCAGTGGCAGGATCACGTCTTTTGATGAACTATGGGGGCGCGCAACTGAATGGCGACTTTCAAAGTTGCAGAGAGGAGCACCGTCCTATTCTGCGTTTGCCTCTGAAAGGACGTCCAATACAGACGCAGTAACCCCCTTAGTTAAACCTTATAAGTCT…	MGCVSSKGNPVLSPQASFNDASRTFFRALPGPAARQLQVYDQCLIGAARWPDDSSKSSTPENRAYCQSMYNSIRSAGGEISSGRITSFDELWGRATEWRLSKLQRGAPSYSAFASERTSNTDAVTPLVKPYKSVIARVVSHKDARDETMRDNLFGDLHVKAYRQTARLNGNIIPLNTFRVATDTAYLRGRVAQLRRELGAEAIEQHLRRYNPDRIDHTDAYYLPIIKNHLNNLYRRATSSDLRRADLIDLIARTHWWAASAMPDQRGSAAKAEFAARAIASAHGIELPPFRNGKVSDIEAMLSGEEEFVGKYVSLLDSDCF	966	321
Psy0451_AvrB1a_1	Psy0451	AvrB	AvrB	AvrB	AvrB1	15	73	13	ATGGGCTGCGTCTCGTCAAAAGGCAACCCAGTGCTTTCTCCGCAGGCTTCTTTTAATGACGCTTCTCGTACGTTTTTCAGAGCACTTCCCGGCCCAGCGGCAAGACAATTGCAGGTCTACGATCAATGCTTAATTGGTGCAGCGCGCTGGCCTGACGATTCCAGTAAGTCGAGCACTCCCGAAAATAGGGCGTATTGTCAGAGCATGTACAACTCAATTCGTTCTGCTGGAGGTGAAATTTCCAGTGGCAGGATCACGTCTTTTGATGAACTATGGGGGCGCGCAACTGAATGGCGACTTTCAAAGTTGCAGAGAGGAGCACCGTCCTATTCTGCGTTTGCCTCTGAAAGGACGTCCAATACAGACGCAGTAACCCCCTTAGTTAAACCTTATAAGTCT…	MGCVSSKGNPVLSPQASFNDASRTFFRALPGPAARQLQVYDQCLIGAARWPDDSSKSSTPENRAYCQSMYNSIRSAGGEISSGRITSFDELWGRATEWRLSKLQRGAPSYSAFASERTSNTDAVTPLVKPYKSVIARVVSHKDARDETMRDNLFGDLHVKAYRQTARLNGNIIPLNTFRVATDTAYLRGRVAQLRRELGAEAIEQHLRRYNPDRIDHTDAYYLPIIKNHLNNLYRRATSSDLRRADLIDLIARTHWWAASAMPDQRGSAAKAEFAARAIASAHGIELPPFRNGKVSDIEAMLSGEEEFVGKYVSLLDSDCF	966	321
Psy0454_AvrB1a_1	Psy0454	AvrB	AvrB	AvrB	AvrB1	15	73	13	ATGGGCTGCGTCTCGTCAAAAGGCAACCCAGTGCTTTCTCCGCAGGCTTCTTTTAATGACGCTTCTCGTACGTTTTTCAGAGCACTTCCCGGCCCAGCGGCAAGACAATTGCAGGTCTACGATCAATGCTTAATTGGTGCAGCGCGCTGGCCTGACGATTCCAGTAAGTCGAGCACTCCCGAAAATAGGGCGTATTGTCAGAGCATGTACAACTCAATTCGTTCTGCTGGAGGTGAAATTTCCAGTGGCAGGATCACGTCTTTTGATGAACTATGGGGGCGCGCAACTGAATGGCGACTTTCAAAGTTGCAGAGAGGAGCACCGTCCTATTCTGCGTTTGCCTCTGAAAGGACGTCCAATACAGACGCAGTAACCCCCTTAGTTAAACCTTATAAGTCT…	MGCVSSKGNPVLSPQASFNDASRTFFRALPGPAARQLQVYDQCLIGAARWPDDSSKSSTPENRAYCQSMYNSIRSAGGEISSGRITSFDELWGRATEWRLSKLQRGAPSYSAFASERTSNTDAVTPLVKPYKSVIARVVSHKDARDETMRDNLFGDLHVKAYRQTARLNGNIIPLNTFRVATDTAYLRGRVAQLRRELGAEAIEQHLRRYNPDRIDHTDAYYLPIIKNHLNNLYRRATSSDLRRADLIDLIARTHWWAASAMPDQRGSAAKAEFAARAIASAHGIELPPFRNGKVSDIEAMLSGEEEFVGKYVSLLDSDCF	966	321
Psy0455_AvrB1a_1	Psy0455	AvrB	AvrB	AvrB	AvrB1	15	73	13	ATGGGCTGCGTCTCGTCAAAAGGCAACCCAGTGCTTTCTCCGCAGGCTTCTTTTAATGACGCTTCTCGTACGTTTTTCAGAGCACTTCCCGGCCCAGCGGCAAGACAATTGCAGGTCTACGATCAATGCTTAATTGGTGCAGCGCGCTGGCCTGACGATTCCAGTAAGTCGAGCACTCCCGAAAATAGGGCGTATTGTCAGAGCATGTACAACTCAATTCGTTCTGCTGGAGGTGAAATTTCCAGTGGCAGGATCACGTCTTTTGATGAACTATGGGGGCGCGCAACTGAATGGCGACTTTCAAAGTTGCAGAGAGGAGCACCGTCCTATTCTGCGTTTGCCTCTGAAAGGACGTCCAATACAGACGCAGTAACCCCCTTAGTTAAACCTTATAAGTCT…	MGCVSSKGNPVLSPQASFNDASRTFFRALPGPAARQLQVYDQCLIGAARWPDDSSKSSTPENRAYCQSMYNSIRSAGGEISSGRITSFDELWGRATEWRLSKLQRGAPSYSAFASERTSNTDAVTPLVKPYKSVIARVVSHKDARDETMRDNLFGDLHVKAYRQTARLNGNIIPLNTFRVATDTAYLRGRVAQLRRELGAEAIEQHLRRYNPDRIDHTDAYYLPIIKNHLNNLYRRATSSDLRRADLIDLIARTHWWAASAMPDQRGSAAKAEFAARAIASAHGIELPPFRNGKVSDIEAMLSGEEEFVGKYVSLLDSDCF	966	321
Psy0456_AvrB1a_1	Psy0456	AvrB	AvrB	AvrB	AvrB1	15	73	13	ATGGGCTGCGTCTCGTCAAAAGGCAACCCAGTGCTTTCTCCGCAGGCTTCTTTTAATGACGCTTCTCGTACGTTTTTCAGAGCACTTCCCGGCCCAGCGGCAAGACAATTGCAGGTCTACGATCAATGCTTAATTGGTGCAGCGCGCTGGCCTGACGATTCCAGTAAGTCGAGCACTCCCGAAAATAGGGCGTATTGTCAGAGCATGTACAACTCAATTCGTTCTGCTGGAGGTGAAATTTCCAGTGGCAGGATCACGTCTTTTGATGAACTATGGGGGCGCGCAACTGAATGGCGACTTTCAAAGTTGCAGAGAGGAGCACCGTCCTATTCTGCGTTTGCCTCTGAAAGGACGTCCAATACAGACGCAGTAACCCCCTTAGTTAAACCTTATAAGTCT…	MGCVSSKGNPVLSPQASFNDASRTFFRALPGPAARQLQVYDQCLIGAARWPDDSSKSSTPENRAYCQSMYNSIRSAGGEISSGRITSFDELWGRATEWRLSKLQRGAPSYSAFASERTSNTDAVTPLVKPYKSVIARVVSHKDARDETMRDNLFGDLHVKAYRQTARLNGNIIPLNTFRVATDTAYLRGRVAQLRRELGAEAIEQHLRRYNPDRIDHTDAYYLPIIKNHLNNLYRRATSSDLRRADLIDLIARTHWWAASAMPDQRGSAAKAEFAARAIASAHGIELPPFRNGKVSDIEAMLSGEEEFVGKYVSLLDSDCF	966	321
Psy0457_AvrB1a_1	Psy0457	AvrB	AvrB	AvrB	AvrB1	15	73	13	ATGGGCTGCGTCTCGTCAAAAGGCAACCCAGTGCTTTCTCCGCAGGCTTCTTTTAATGACGCTTCTCGTACGTTTTTCAGAGCACTTCCCGGCCCAGCGGCAAGACAATTGCAGGTCTACGATCAATGCTTAATTGGTGCAGCGCGCTGGCCTGACGATTCCAGTAAGTCGAGCACTCCCGAAAATAGGGCGTATTGTCAGAGCATGTACAACTCAATTCGTTCTGCTGGAGGTGAAATTTCCAGTGGCAGGATCACGTCTTTTGATGAACTATGGGGGCGCGCAACTGAATGGCGACTTTCAAAGTTGCAGAGAGGAGCACCGTCCTATTCTGCGTTTGCCTCTGAAAGGACGTCCAATACAGACGCAGTAACCCCCTTAGTTAAACCTTATAAGTCT…	MGCVSSKGNPVLSPQASFNDASRTFFRALPGPAARQLQVYDQCLIGAARWPDDSSKSSTPENRAYCQSMYNSIRSAGGEISSGRITSFDELWGRATEWRLSKLQRGAPSYSAFASERTSNTDAVTPLVKPYKSVIARVVSHKDARDETMRDNLFGDLHVKAYRQTARLNGNIIPLNTFRVATDTAYLRGRVAQLRRELGAEAIEQHLRRYNPDRIDHTDAYYLPIIKNHLNNLYRRATSSDLRRADLIDLIARTHWWAASAMPDQRGSAAKAEFAARAIASAHGIELPPFRNGKVSDIEAMLSGEEEFVGKYVSLLDSDCF	966	321
Psy0458_AvrB1a_1	Psy0458	AvrB	AvrB	AvrB	AvrB1	15	73	13	ATGGGCTGCGTCTCGTCAAAAGGCAACCCAGTGCTTTCTCCGCAGGCTTCTTTTAATGACGCTTCTCGTACGTTTTTCAGAGCACTTCCCGGCCCAGCGGCAAGACAATTGCAGGTCTACGATCAATGCTTAATTGGTGCAGCGCGCTGGCCTGACGATTCCAGTAAGTCGAGCACTCCCGAAAATAGGGCGTATTGTCAGAGCATGTACAACTCAATTCGTTCTGCTGGAGGTGAAATTTCCAGTGGCAGGATCACGTCTTTTGATGAACTATGGGGGCGCGCAACTGAATGGCGACTTTCAAAGTTGCAGAGAGGAGCACCGTCCTATTCTGCGTTTGCCTCTGAAAGGACGTCCAATACAGACGCAGTAACCCCCTTAGTTAAACCTTATAAGTCT…	MGCVSSKGNPVLSPQASFNDASRTFFRALPGPAARQLQVYDQCLIGAARWPDDSSKSSTPENRAYCQSMYNSIRSAGGEISSGRITSFDELWGRATEWRLSKLQRGAPSYSAFASERTSNTDAVTPLVKPYKSVIARVVSHKDARDETMRDNLFGDLHVKAYRQTARLNGNIIPLNTFRVATDTAYLRGRVAQLRRELGAEAIEQHLRRYNPDRIDHTDAYYLPIIKNHLNNLYRRATSSDLRRADLIDLIARTHWWAASAMPDQRGSAAKAEFAARAIASAHGIELPPFRNGKVSDIEAMLSGEEEFVGKYVSLLDSDCF	966	321
Psy0459_AvrB1a_1	Psy0459	AvrB	AvrB	AvrB	AvrB1	15	73	13	ATGGGCTGCGTCTCGTCAAAAGGCAACCCAGTGCTTTCTCCGCAGGCTTCTTTTAATGACGCTTCTCGTACGTTTTTCAGAGCACTTCCCGGCCCAGCGGCAAGACAATTGCAGGTCTACGATCAATGCTTAATTGGTGCAGCGCGCTGGCCTGACGATTCCAGTAAGTCGAGCACTCCCGAAAATAGGGCGTATTGTCAGAGCATGTACAACTCAATTCGTTCTGCTGGAGGTGAAATTTCCAGTGGCAGGATCACGTCTTTTGATGAACTATGGGGGCGCGCAACTGAATGGCGACTTTCAAAGTTGCAGAGAGGAGCACCGTCCTATTCTGCGTTTGCCTCTGAAAGGACGTCCAATACAGACGCAGTAACCCCCTTAGTTAAACCTTATAAGTCT…	MGCVSSKGNPVLSPQASFNDASRTFFRALPGPAARQLQVYDQCLIGAARWPDDSSKSSTPENRAYCQSMYNSIRSAGGEISSGRITSFDELWGRATEWRLSKLQRGAPSYSAFASERTSNTDAVTPLVKPYKSVIARVVSHKDARDETMRDNLFGDLHVKAYRQTARLNGNIIPLNTFRVATDTAYLRGRVAQLRRELGAEAIEQHLRRYNPDRIDHTDAYYLPIIKNHLNNLYRRATSSDLRRADLIDLIARTHWWAASAMPDQRGSAAKAEFAARAIASAHGIELPPFRNGKVSDIEAMLSGEEEFVGKYVSLLDSDCF	966	321
Psy0460_AvrB1a_1	Psy0460	AvrB	AvrB	AvrB	AvrB1	15	73	13	ATGGGCTGCGTCTCGTCAAAAGGCAACCCAGTGCTTTCTCCGCAGGCTTCTTTTAATGACGCTTCTCGTACGTTTTTCAGAGCACTTCCCGGCCCAGCGGCAAGACAATTGCAGGTCTACGATCAATGCTTAATTGGTGCAGCGCGCTGGCCTGACGATTCCAGTAAGTCGAGCACTCCCGAAAATAGGGCGTATTGTCAGAGCATGTACAACTCAATTCGTTCTGCTGGAGGTGAAATTTCCAGTGGCAGGATCACGTCTTTTGATGAACTATGGGGGCGCGCAACTGAATGGCGACTTTCAAAGTTGCAGAGAGGAGCACCGTCCTATTCTGCGTTTGCCTCTGAAAGGACGTCCAATACAGACGCAGTAACCCCCTTAGTTAAACCTTATAAGTCT…	MGCVSSKGNPVLSPQASFNDASRTFFRALPGPAARQLQVYDQCLIGAARWPDDSSKSSTPENRAYCQSMYNSIRSAGGEISSGRITSFDELWGRATEWRLSKLQRGAPSYSAFASERTSNTDAVTPLVKPYKSVIARVVSHKDARDETMRDNLFGDLHVKAYRQTARLNGNIIPLNTFRVATDTAYLRGRVAQLRRELGAEAIEQHLRRYNPDRIDHTDAYYLPIIKNHLNNLYRRATSSDLRRADLIDLIARTHWWAASAMPDQRGSAAKAEFAARAIASAHGIELPPFRNGKVSDIEAMLSGEEEFVGKYVSLLDSDCF	966	321
Psy0461_AvrB1a_1	Psy0461	AvrB	AvrB	AvrB	AvrB1	15	73	13	ATGGGCTGCGTCTCGTCAAAAGGCAACCCAGTGCTTTCTCCGCAGGCTTCTTTTAATGACGCTTCTCGTACGTTTTTCAGAGCACTTCCCGGCCCAGCGGCAAGACAATTGCAGGTCTACGATCAATGCTTAATTGGTGCAGCGCGCTGGCCTGACGATTCCAGTAAGTCGAGCACTCCCGAAAATAGGGCGTATTGTCAGAGCATGTACAACTCAATTCGTTCTGCTGGAGGTGAAATTTCCAGTGGCAGGATCACGTCTTTTGATGAACTATGGGGGCGCGCAACTGAATGGCGACTTTCAAAGTTGCAGAGAGGAGCACCGTCCTATTCTGCGTTTGCCTCTGAAAGGACGTCCAATACAGACGCAGTAACCCCCTTAGTTAAACCTTATAAGTCT…	MGCVSSKGNPVLSPQASFNDASRTFFRALPGPAARQLQVYDQCLIGAARWPDDSSKSSTPENRAYCQSMYNSIRSAGGEISSGRITSFDELWGRATEWRLSKLQRGAPSYSAFASERTSNTDAVTPLVKPYKSVIARVVSHKDARDETMRDNLFGDLHVKAYRQTARLNGNIIPLNTFRVATDTAYLRGRVAQLRRELGAEAIEQHLRRYNPDRIDHTDAYYLPIIKNHLNNLYRRATSSDLRRADLIDLIARTHWWAASAMPDQRGSAAKAEFAARAIASAHGIELPPFRNGKVSDIEAMLSGEEEFVGKYVSLLDSDCF	966	321
Psy0462_AvrB1a_1	Psy0462	AvrB	AvrB	AvrB	AvrB1	15	73	13	ATGGGCTGCGTCTCGTCAAAAGGCAACCCAGTGCTTTCTCCGCAGGCTTCTTTTAATGACGCTTCTCGTACGTTTTTCAGAGCACTTCCCGGCCCAGCGGCAAGACAATTGCAGGTCTACGATCAATGCTTAATTGGTGCAGCGCGCTGGCCTGACGATTCCAGTAAGTCGAGCACTCCCGAAAATAGGGCGTATTGTCAGAGCATGTACAACTCAATTCGTTCTGCTGGAGGTGAAATTTCCAGTGGCAGGATCACGTCTTTTGATGAACTATGGGGGCGCGCAACTGAATGGCGACTTTCAAAGTTGCAGAGAGGAGCACCGTCCTATTCTGCGTTTGCCTCTGAAAGGACGTCCAATACAGACGCAGTAACCCCCTTAGTTAAACCTTATAAGTCT…	MGCVSSKGNPVLSPQASFNDASRTFFRALPGPAARQLQVYDQCLIGAARWPDDSSKSSTPENRAYCQSMYNSIRSAGGEISSGRITSFDELWGRATEWRLSKLQRGAPSYSAFASERTSNTDAVTPLVKPYKSVIARVVSHKDARDETMRDNLFGDLHVKAYRQTARLNGNIIPLNTFRVATDTAYLRGRVAQLRRELGAEAIEQHLRRYNPDRIDHTDAYYLPIIKNHLNNLYRRATSSDLRRADLIDLIARTHWWAASAMPDQRGSAAKAEFAARAIASAHGIELPPFRNGKVSDIEAMLSGEEEFVGKYVSLLDSDCF	966	321
Psy0463_AvrB1a_1	Psy0463	AvrB	AvrB	AvrB	AvrB1	15	73	13	ATGGGCTGCGTCTCGTCAAAAGGCAACCCAGTGCTTTCTCCGCAGGCTTCTTTTAATGACGCTTCTCGTACGTTTTTCAGAGCACTTCCCGGCCCAGCGGCAAGACAATTGCAGGTCTACGATCAATGCTTAATTGGTGCAGCGCGCTGGCCTGACGATTCCAGTAAGTCGAGCACTCCCGAAAATAGGGCGTATTGTCAGAGCATGTACAACTCAATTCGTTCTGCTGGAGGTGAAATTTCCAGTGGCAGGATCACGTCTTTTGATGAACTATGGGGGCGCGCAACTGAATGGCGACTTTCAAAGTTGCAGAGAGGAGCACCGTCCTATTCTGCGTTTGCCTCTGAAAGGACGTCCAATACAGACGCAGTAACCCCCTTAGTTAAACCTTATAAGTCT…	MGCVSSKGNPVLSPQASFNDASRTFFRALPGPAARQLQVYDQCLIGAARWPDDSSKSSTPENRAYCQSMYNSIRSAGGEISSGRITSFDELWGRATEWRLSKLQRGAPSYSAFASERTSNTDAVTPLVKPYKSVIARVVSHKDARDETMRDNLFGDLHVKAYRQTARLNGNIIPLNTFRVATDTAYLRGRVAQLRRELGAEAIEQHLRRYNPDRIDHTDAYYLPIIKNHLNNLYRRATSSDLRRADLIDLIARTHWWAASAMPDQRGSAAKAEFAARAIASAHGIELPPFRNGKVSDIEAMLSGEEEFVGKYVSLLDSDCF	966	321
Psy0464_AvrB1a_1	Psy0464	AvrB	AvrB	AvrB	AvrB1	15	73	13	ATGGGCTGCGTCTCGTCAAAAGGCAACCCAGTGCTTTCTCCGCAGGCTTCTTTTAATGACGCTTCTCGTACGTTTTTCAGAGCACTTCCCGGCCCAGCGGCAAGACAATTGCAGGTCTACGATCAATGCTTAATTGGTGCAGCGCGCTGGCCTGACGATTCCAGTAAGTCGAGCACTCCCGAAAATAGGGCGTATTGTCAGAGCATGTACAACTCAATTCGTTCTGCTGGAGGTGAAATTTCCAGTGGCAGGATCACGTCTTTTGATGAACTATGGGGGCGCGCAACTGAATGGCGACTTTCAAAGTTGCAGAGAGGAGCACCGTCCTATTCTGCGTTTGCCTCTGAAAGGACGTCCAATACAGACGCAGTAACCCCCTTAGTTAAACCTTATAAGTCT…	MGCVSSKGNPVLSPQASFNDASRTFFRALPGPAARQLQVYDQCLIGAARWPDDSSKSSTPENRAYCQSMYNSIRSAGGEISSGRITSFDELWGRATEWRLSKLQRGAPSYSAFASERTSNTDAVTPLVKPYKSVIARVVSHKDARDETMRDNLFGDLHVKAYRQTARLNGNIIPLNTFRVATDTAYLRGRVAQLRRELGAEAIEQHLRRYNPDRIDHTDAYYLPIIKNHLNNLYRRATSSDLRRADLIDLIARTHWWAASAMPDQRGSAAKAEFAARAIASAHGIELPPFRNGKVSDIEAMLSGEEEFVGKYVSLLDSDCF	966	321
Psy0465_AvrB1a_1	Psy0465	AvrB	AvrB	AvrB	AvrB1	15	73	13	ATGGGCTGCGTCTCGTCAAAAGGCAACCCAGTGCTTTCTCCGCAGGCTTCTTTTAATGACGCTTCTCGTACGTTTTTCAGAGCACTTCCCGGCCCAGCGGCAAGACAATTGCAGGTCTACGATCAATGCTTAATTGGTGCAGCGCGCTGGCCTGACGATTCCAGTAAGTCGAGCACTCCCGAAAATAGGGCGTATTGTCAGAGCATGTACAACTCAATTCGTTCTGCTGGAGGTGAAATTTCCAGTGGCAGGATCACGTCTTTTGATGAACTATGGGGGCGCGCAACTGAATGGCGACTTTCAAAGTTGCAGAGAGGAGCACCGTCCTATTCTGCGTTTGCCTCTGAAAGGACGTCCAATACAGACGCAGTAACCCCCTTAGTTAAACCTTATAAGTCT…	MGCVSSKGNPVLSPQASFNDASRTFFRALPGPAARQLQVYDQCLIGAARWPDDSSKSSTPENRAYCQSMYNSIRSAGGEISSGRITSFDELWGRATEWRLSKLQRGAPSYSAFASERTSNTDAVTPLVKPYKSVIARVVSHKDARDETMRDNLFGDLHVKAYRQTARLNGNIIPLNTFRVATDTAYLRGRVAQLRRELGAEAIEQHLRRYNPDRIDHTDAYYLPIIKNHLNNLYRRATSSDLRRADLIDLIARTHWWAASAMPDQRGSAAKAEFAARAIASAHGIELPPFRNGKVSDIEAMLSGEEEFVGKYVSLLDSDCF	966	321
Psy0466_AvrB1a_1	Psy0466	AvrB	AvrB	AvrB	AvrB1	15	73	13	ATGGGCTGCGTCTCGTCAAAAGGCAACCCAGTGCTTTCTCCGCAGGCTTCTTTTAATGACGCTTCTCGTACGTTTTTCAGAGCACTTCCCGGCCCAGCGGCAAGACAATTGCAGGTCTACGATCAATGCTTAATTGGTGCAGCGCGCTGGCCTGACGATTCCAGTAAGTCGAGCACTCCCGAAAATAGGGCGTATTGTCAGAGCATGTACAACTCAATTCGTTCTGCTGGAGGTGAAATTTCCAGTGGCAGGATCACGTCTTTTGATGAACTATGGGGGCGCGCAACTGAATGGCGACTTTCAAAGTTGCAGAGAGGAGCACCGTCCTATTCTGCGTTTGCCTCTGAAAGGACGTCCAATACAGACGCAGTAACCCCCTTAGTTAAACCTTATAAGTCT…	MGCVSSKGNPVLSPQASFNDASRTFFRALPGPAARQLQVYDQCLIGAARWPDDSSKSSTPENRAYCQSMYNSIRSAGGEISSGRITSFDELWGRATEWRLSKLQRGAPSYSAFASERTSNTDAVTPLVKPYKSVIARVVSHKDARDETMRDNLFGDLHVKAYRQTARLNGNIIPLNTFRVATDTAYLRGRVAQLRRELGAEAIEQHLRRYNPDRIDHTDAYYLPIIKNHLNNLYRRATSSDLRRADLIDLIARTHWWAASAMPDQRGSAAKAEFAARAIASAHGIELPPFRNGKVSDIEAMLSGEEEFVGKYVSLLDSDCF	966	321
Psy0470_AvrB1a_1	Psy0470	AvrB	AvrB	AvrB	AvrB1	15	73	13	ATGGGCTGCGTCTCGTCAAAAGGCAACCCAGTGCTTTCTCCGCAGGCTTCTTTTAATGACGCTTCTCGTACGTTTTTCAGAGCACTTCCCGGCCCAGCGGCAAGACAATTGCAGGTCTACGATCAATGCTTAATTGGTGCAGCGCGCTGGCCTGACGATTCCAGTAAGTCGAGCACTCCCGAAAATAGGGCGTATTGTCAGAGCATGTACAACTCAATTCGTTCTGCTGGAGGTGAAATTTCCAGTGGCAGGATCACGTCTTTTGATGAACTATGGGGGCGCGCAACTGAATGGCGACTTTCAAAGTTGCAGAGAGGAGCACCGTCCTATTCTGCGTTTGCCTCTGAAAGGACGTCCAATACAGACGCAGTAACCCCCTTAGTTAAACCTTATAAGTCT…	MGCVSSKGNPVLSPQASFNDASRTFFRALPGPAARQLQVYDQCLIGAARWPDDSSKSSTPENRAYCQSMYNSIRSAGGEISSGRITSFDELWGRATEWRLSKLQRGAPSYSAFASERTSNTDAVTPLVKPYKSVIARVVSHKDARDETMRDNLFGDLHVKAYRQTARLNGNIIPLNTFRVATDTAYLRGRVAQLRRELGAEAIEQHLRRYNPDRIDHTDAYYLPIIKNHLNNLYRRATSSDLRRADLIDLIARTHWWAASAMPDQRGSAAKAEFAARAIASAHGIELPPFRNGKVSDIEAMLSGEEEFVGKYVSLLDSDCF	966	321
Psy0471_AvrB1a_1	Psy0471	AvrB	AvrB	AvrB	AvrB1	15	73	13	ATGGGCTGCGTCTCGTCAAAAGGCAACCCAGTGCTTTCTCCGCAGGCTTCTTTTAATGACGCTTCTCGTACGTTTTTCAGAGCACTTCCCGGCCCAGCGGCAAGACAATTGCAGGTCTACGATCAATGCTTAATTGGTGCAGCGCGCTGGCCTGACGATTCCAGTAAGTCGAGCACTCCCGAAAATAGGGCGTATTGTCAGAGCATGTACAACTCAATTCGTTCTGCTGGAGGTGAAATTTCCAGTGGCAGGATCACGTCTTTTGATGAACTATGGGGGCGCGCAACTGAATGGCGACTTTCAAAGTTGCAGAGAGGAGCACCGTCCTATTCTGCGTTTGCCTCTGAAAGGACGTCCAATACAGACGCAGTAACCCCCTTAGTTAAACCTTATAAGTCT…	MGCVSSKGNPVLSPQASFNDASRTFFRALPGPAARQLQVYDQCLIGAARWPDDSSKSSTPENRAYCQSMYNSIRSAGGEISSGRITSFDELWGRATEWRLSKLQRGAPSYSAFASERTSNTDAVTPLVKPYKSVIARVVSHKDARDETMRDNLFGDLHVKAYRQTARLNGNIIPLNTFRVATDTAYLRGRVAQLRRELGAEAIEQHLRRYNPDRIDHTDAYYLPIIKNHLNNLYRRATSSDLRRADLIDLIARTHWWAASAMPDQRGSAAKAEFAARAIASAHGIELPPFRNGKVSDIEAMLSGEEEFVGKYVSLLDSDCF	966	321
Psy0475_AvrB1a_1	Psy0475	AvrB	AvrB	AvrB	AvrB1	15	73	13	ATGGGCTGCGTCTCGTCAAAAGGCAACCCAGTGCTTTCTCCGCAGGCTTCTTTTAATGACGCTTCTCGTACGTTTTTCAGAGCACTTCCCGGCCCAGCGGCAAGACAATTGCAGGTCTACGATCAATGCTTAATTGGTGCAGCGCGCTGGCCTGACGATTCCAGTAAGTCGAGCACTCCCGAAAATAGGGCGTATTGTCAGAGCATGTACAACTCAATTCGTTCTGCTGGAGGTGAAATTTCCAGTGGCAGGATCACGTCTTTTGATGAACTATGGGGGCGCGCAACTGAATGGCGACTTTCAAAGTTGCAGAGAGGAGCACCGTCCTATTCTGCGTTTGCCTCTGAAAGGACGTCCAATACAGACGCAGTAACCCCCTTAGTTAAACCTTATAAGTCT…	MGCVSSKGNPVLSPQASFNDASRTFFRALPGPAARQLQVYDQCLIGAARWPDDSSKSSTPENRAYCQSMYNSIRSAGGEISSGRITSFDELWGRATEWRLSKLQRGAPSYSAFASERTSNTDAVTPLVKPYKSVIARVVSHKDARDETMRDNLFGDLHVKAYRQTARLNGNIIPLNTFRVATDTAYLRGRVAQLRRELGAEAIEQHLRRYNPDRIDHTDAYYLPIIKNHLNNLYRRATSSDLRRADLIDLIARTHWWAASAMPDQRGSAAKAEFAARAIASAHGIELPPFRNGKVSDIEAMLSGEEEFVGKYVSLLDSDCF	966	321
Psy0476_AvrB1a_1	Psy0476	AvrB	AvrB	AvrB	AvrB1	15	73	13	ATGGGCTGCGTCTCGTCAAAAGGCAACCCAGTGCTTTCTCCGCAGGCTTCTTTTAATGACGCTTCTCGTACGTTTTTCAGAGCACTTCCCGGCCCAGCGGCAAGACAATTGCAGGTCTACGATCAATGCTTAATTGGTGCAGCGCGCTGGCCTGACGATTCCAGTAAGTCGAGCACTCCCGAAAATAGGGCGTATTGTCAGAGCATGTACAACTCAATTCGTTCTGCTGGAGGTGAAATTTCCAGTGGCAGGATCACGTCTTTTGATGAACTATGGGGGCGCGCAACTGAATGGCGACTTTCAAAGTTGCAGAGAGGAGCACCGTCCTATTCTGCGTTTGCCTCTGAAAGGACGTCCAATACAGACGCAGTAACCCCCTTAGTTAAACCTTATAAGTCT…	MGCVSSKGNPVLSPQASFNDASRTFFRALPGPAARQLQVYDQCLIGAARWPDDSSKSSTPENRAYCQSMYNSIRSAGGEISSGRITSFDELWGRATEWRLSKLQRGAPSYSAFASERTSNTDAVTPLVKPYKSVIARVVSHKDARDETMRDNLFGDLHVKAYRQTARLNGNIIPLNTFRVATDTAYLRGRVAQLRRELGAEAIEQHLRRYNPDRIDHTDAYYLPIIKNHLNNLYRRATSSDLRRADLIDLIARTHWWAASAMPDQRGSAAKAEFAARAIASAHGIELPPFRNGKVSDIEAMLSGEEEFVGKYVSLLDSDCF	966	321
Psy0477_AvrB1a_1	Psy0477	AvrB	AvrB	AvrB	AvrB1	15	73	13	ATGGGCTGCGTCTCGTCAAAAGGCAACCCAGTGCTTTCTCCGCAGGCTTCTTTTAATGACGCTTCTCGTACGTTTTTCAGAGCACTTCCCGGCCCAGCGGCAAGACAATTGCAGGTCTACGATCAATGCTTAATTGGTGCAGCGCGCTGGCCTGACGATTCCAGTAAGTCGAGCACTCCCGAAAATAGGGCGTATTGTCAGAGCATGTACAACTCAATTCGTTCTGCTGGAGGTGAAATTTCCAGTGGCAGGATCACGTCTTTTGATGAACTATGGGGGCGCGCAACTGAATGGCGACTTTCAAAGTTGCAGAGAGGAGCACCGTCCTATTCTGCGTTTGCCTCTGAAAGGACGTCCAATACAGACGCAGTAACCCCCTTAGTTAAACCTTATAAGTCT…	MGCVSSKGNPVLSPQASFNDASRTFFRALPGPAARQLQVYDQCLIGAARWPDDSSKSSTPENRAYCQSMYNSIRSAGGEISSGRITSFDELWGRATEWRLSKLQRGAPSYSAFASERTSNTDAVTPLVKPYKSVIARVVSHKDARDETMRDNLFGDLHVKAYRQTARLNGNIIPLNTFRVATDTAYLRGRVAQLRRELGAEAIEQHLRRYNPDRIDHTDAYYLPIIKNHLNNLYRRATSSDLRRADLIDLIARTHWWAASAMPDQRGSAAKAEFAARAIASAHGIELPPFRNGKVSDIEAMLSGEEEFVGKYVSLLDSDCF	966	321
Psy0483_AvrB1a_1	Psy0483	AvrB	AvrB	AvrB	AvrB1	15	73	13	ATGGGCTGCGTCTCGTCAAAAGGCAACCCAGTGCTTTCTCCGCAGGCTTCTTTTAATGACGCTTCTCGTACGTTTTTCAGAGCACTTCCCGGCCCAGCGGCAAGACAATTGCAGGTCTACGATCAATGCTTAATTGGTGCAGCGCGCTGGCCTGACGATTCCAGTAAGTCGAGCACTCCCGAAAATAGGGCGTATTGTCAGAGCATGTACAACTCAATTCGTTCTGCTGGAGGTGAAATTTCCAGTGGCAGGATCACGTCTTTTGATGAACTATGGGGGCGCGCAACTGAATGGCGACTTTCAAAGTTGCAGAGAGGAGCACCGTCCTATTCTGCGTTTGCCTCTGAAAGGACGTCCAATACAGACGCAGTAACCCCCTTAGTTAAACCTTATAAGTCT…	MGCVSSKGNPVLSPQASFNDASRTFFRALPGPAARQLQVYDQCLIGAARWPDDSSKSSTPENRAYCQSMYNSIRSAGGEISSGRITSFDELWGRATEWRLSKLQRGAPSYSAFASERTSNTDAVTPLVKPYKSVIARVVSHKDARDETMRDNLFGDLHVKAYRQTARLNGNIIPLNTFRVATDTAYLRGRVAQLRRELGAEAIEQHLRRYNPDRIDHTDAYYLPIIKNHLNNLYRRATSSDLRRADLIDLIARTHWWAASAMPDQRGSAAKAEFAARAIASAHGIELPPFRNGKVSDIEAMLSGEEEFVGKYVSLLDSDCF	966	321
Psy0484_AvrB1a_1	Psy0484	AvrB	AvrB	AvrB	AvrB1	15	73	13	ATGGGCTGCGTCTCGTCAAAAGGCAACCCAGTGCTTTCTCCGCAGGCTTCTTTTAATGACGCTTCTCGTACGTTTTTCAGAGCACTTCCCGGCCCAGCGGCAAGACAATTGCAGGTCTACGATCAATGCTTAATTGGTGCAGCGCGCTGGCCTGACGATTCCAGTAAGTCGAGCACTCCCGAAAATAGGGCGTATTGTCAGAGCATGTACAACTCAATTCGTTCTGCTGGAGGTGAAATTTCCAGTGGCAGGATCACGTCTTTTGATGAACTATGGGGGCGCGCAACTGAATGGCGACTTTCAAAGTTGCAGAGAGGAGCACCGTCCTATTCTGCGTTTGCCTCTGAAAGGACGTCCAATACAGACGCAGTAACCCCCTTAGTTAAACCTTATAAGTCT…	MGCVSSKGNPVLSPQASFNDASRTFFRALPGPAARQLQVYDQCLIGAARWPDDSSKSSTPENRAYCQSMYNSIRSAGGEISSGRITSFDELWGRATEWRLSKLQRGAPSYSAFASERTSNTDAVTPLVKPYKSVIARVVSHKDARDETMRDNLFGDLHVKAYRQTARLNGNIIPLNTFRVATDTAYLRGRVAQLRRELGAEAIEQHLRRYNPDRIDHTDAYYLPIIKNHLNNLYRRATSSDLRRADLIDLIARTHWWAASAMPDQRGSAAKAEFAARAIASAHGIELPPFRNGKVSDIEAMLSGEEEFVGKYVSLLDSDCF	966	321
Psy0485_AvrB1a_1	Psy0485	AvrB	AvrB	AvrB	AvrB1	15	73	13	ATGGGCTGCGTCTCGTCAAAAGGCAACCCAGTGCTTTCTCCGCAGGCTTCTTTTAATGACGCTTCTCGTACGTTTTTCAGAGCACTTCCCGGCCCAGCGGCAAGACAATTGCAGGTCTACGATCAATGCTTAATTGGTGCAGCGCGCTGGCCTGACGATTCCAGTAAGTCGAGCACTCCCGAAAATAGGGCGTATTGTCAGAGCATGTACAACTCAATTCGTTCTGCTGGAGGTGAAATTTCCAGTGGCAGGATCACGTCTTTTGATGAACTATGGGGGCGCGCAACTGAATGGCGACTTTCAAAGTTGCAGAGAGGAGCACCGTCCTATTCTGCGTTTGCCTCTGAAAGGACGTCCAATACAGACGCAGTAACCCCCTTAGTTAAACCTTATAAGTCT…	MGCVSSKGNPVLSPQASFNDASRTFFRALPGPAARQLQVYDQCLIGAARWPDDSSKSSTPENRAYCQSMYNSIRSAGGEISSGRITSFDELWGRATEWRLSKLQRGAPSYSAFASERTSNTDAVTPLVKPYKSVIARVVSHKDARDETMRDNLFGDLHVKAYRQTARLNGNIIPLNTFRVATDTAYLRGRVAQLRRELGAEAIEQHLRRYNPDRIDHTDAYYLPIIKNHLNNLYRRATSSDLRRADLIDLIARTHWWAASAMPDQRGSAAKAEFAARAIASAHGIELPPFRNGKVSDIEAMLSGEEEFVGKYVSLLDSDCF	966	321
Psy0486_AvrB1a_1	Psy0486	AvrB	AvrB	AvrB	AvrB1	15	73	13	ATGGGCTGCGTCTCGTCAAAAGGCAACCCAGTGCTTTCTCCGCAGGCTTCTTTTAATGACGCTTCTCGTACGTTTTTCAGAGCACTTCCCGGCCCAGCGGCAAGACAATTGCAGGTCTACGATCAATGCTTAATTGGTGCAGCGCGCTGGCCTGACGATTCCAGTAAGTCGAGCACTCCCGAAAATAGGGCGTATTGTCAGAGCATGTACAACTCAATTCGTTCTGCTGGAGGTGAAATTTCCAGTGGCAGGATCACGTCTTTTGATGAACTATGGGGGCGCGCAACTGAATGGCGACTTTCAAAGTTGCAGAGAGGAGCACCGTCCTATTCTGCGTTTGCCTCTGAAAGGACGTCCAATACAGACGCAGTAACCCCCTTAGTTAAACCTTATAAGTCT…	MGCVSSKGNPVLSPQASFNDASRTFFRALPGPAARQLQVYDQCLIGAARWPDDSSKSSTPENRAYCQSMYNSIRSAGGEISSGRITSFDELWGRATEWRLSKLQRGAPSYSAFASERTSNTDAVTPLVKPYKSVIARVVSHKDARDETMRDNLFGDLHVKAYRQTARLNGNIIPLNTFRVATDTAYLRGRVAQLRRELGAEAIEQHLRRYNPDRIDHTDAYYLPIIKNHLNNLYRRATSSDLRRADLIDLIARTHWWAASAMPDQRGSAAKAEFAARAIASAHGIELPPFRNGKVSDIEAMLSGEEEFVGKYVSLLDSDCF	966	321
Psy0487_AvrB1a_1	Psy0487	AvrB	AvrB	AvrB	AvrB1	15	73	13	ATGGGCTGCGTCTCGTCAAAAGGCAACCCAGTGCTTTCTCCGCAGGCTTCTTTTAATGACGCTTCTCGTACGTTTTTCAGAGCACTTCCCGGCCCAGCGGCAAGACAATTGCAGGTCTACGATCAATGCTTAATTGGTGCAGCGCGCTGGCCTGACGATTCCAGTAAGTCGAGCACTCCCGAAAATAGGGCGTATTGTCAGAGCATGTACAACTCAATTCGTTCTGCTGGAGGTGAAATTTCCAGTGGCAGGATCACGTCTTTTGATGAACTATGGGGGCGCGCAACTGAATGGCGACTTTCAAAGTTGCAGAGAGGAGCACCGTCCTATTCTGCGTTTGCCTCTGAAAGGACGTCCAATACAGACGCAGTAACCCCCTTAGTTAAACCTTATAAGTCT…	MGCVSSKGNPVLSPQASFNDASRTFFRALPGPAARQLQVYDQCLIGAARWPDDSSKSSTPENRAYCQSMYNSIRSAGGEISSGRITSFDELWGRATEWRLSKLQRGAPSYSAFASERTSNTDAVTPLVKPYKSVIARVVSHKDARDETMRDNLFGDLHVKAYRQTARLNGNIIPLNTFRVATDTAYLRGRVAQLRRELGAEAIEQHLRRYNPDRIDHTDAYYLPIIKNHLNNLYRRATSSDLRRADLIDLIARTHWWAASAMPDQRGSAAKAEFAARAIASAHGIELPPFRNGKVSDIEAMLSGEEEFVGKYVSLLDSDCF	966	321
Psy0488_AvrB1a_1	Psy0488	AvrB	AvrB	AvrB	AvrB1	15	73	13	ATGGGCTGCGTCTCGTCAAAAGGCAACCCAGTGCTTTCTCCGCAGGCTTCTTTTAATGACGCTTCTCGTACGTTTTTCAGAGCACTTCCCGGCCCAGCGGCAAGACAATTGCAGGTCTACGATCAATGCTTAATTGGTGCAGCGCGCTGGCCTGACGATTCCAGTAAGTCGAGCACTCCCGAAAATAGGGCGTATTGTCAGAGCATGTACAACTCAATTCGTTCTGCTGGAGGTGAAATTTCCAGTGGCAGGATCACGTCTTTTGATGAACTATGGGGGCGCGCAACTGAATGGCGACTTTCAAAGTTGCAGAGAGGAGCACCGTCCTATTCTGCGTTTGCCTCTGAAAGGACGTCCAATACAGACGCAGTAACCCCCTTAGTTAAACCTTATAAGTCT…	MGCVSSKGNPVLSPQASFNDASRTFFRALPGPAARQLQVYDQCLIGAARWPDDSSKSSTPENRAYCQSMYNSIRSAGGEISSGRITSFDELWGRATEWRLSKLQRGAPSYSAFASERTSNTDAVTPLVKPYKSVIARVVSHKDARDETMRDNLFGDLHVKAYRQTARLNGNIIPLNTFRVATDTAYLRGRVAQLRRELGAEAIEQHLRRYNPDRIDHTDAYYLPIIKNHLNNLYRRATSSDLRRADLIDLIARTHWWAASAMPDQRGSAAKAEFAARAIASAHGIELPPFRNGKVSDIEAMLSGEEEFVGKYVSLLDSDCF	966	321
Psy0489_AvrB1a_1	Psy0489	AvrB	AvrB	AvrB	AvrB1	15	73	13	ATGGGCTGCGTCTCGTCAAAAGGCAACCCAGTGCTTTCTCCGCAGGCTTCTTTTAATGACGCTTCTCGTACGTTTTTCAGAGCACTTCCCGGCCCAGCGGCAAGACAATTGCAGGTCTACGATCAATGCTTAATTGGTGCAGCGCGCTGGCCTGACGATTCCAGTAAGTCGAGCACTCCCGAAAATAGGGCGTATTGTCAGAGCATGTACAACTCAATTCGTTCTGCTGGAGGTGAAATTTCCAGTGGCAGGATCACGTCTTTTGATGAACTATGGGGGCGCGCAACTGAATGGCGACTTTCAAAGTTGCAGAGAGGAGCACCGTCCTATTCTGCGTTTGCCTCTGAAAGGACGTCCAATACAGACGCAGTAACCCCCTTAGTTAAACCTTATAAGTCT…	MGCVSSKGNPVLSPQASFNDASRTFFRALPGPAARQLQVYDQCLIGAARWPDDSSKSSTPENRAYCQSMYNSIRSAGGEISSGRITSFDELWGRATEWRLSKLQRGAPSYSAFASERTSNTDAVTPLVKPYKSVIARVVSHKDARDETMRDNLFGDLHVKAYRQTARLNGNIIPLNTFRVATDTAYLRGRVAQLRRELGAEAIEQHLRRYNPDRIDHTDAYYLPIIKNHLNNLYRRATSSDLRRADLIDLIARTHWWAASAMPDQRGSAAKAEFAARAIASAHGIELPPFRNGKVSDIEAMLSGEEEFVGKYVSLLDSDCF	966	321
PgcNCPPB2708_AvrB1a_1	PgcNCPPB2708	AvrB	AvrB	AvrB	AvrB1	15	73	14	ATGTACAACTCAATTCGTTCTGCTGGAGGTGAAATTTCCAGTGGCAGGATCACGTCTTTTGATGAACTATGGGGGCGCGCAACTGAATGGCGACTTTCAAAGTTGCAGAGAGGAGCACCGTCCTATTCTGCGTTTGCCTCTGAAAGGACGTCCAATACAGACGCAGTAACCCCCTTAGTTAAACCTTATAAGTCTGTCATTGCCAGGGTTGTTAGTCACAAGGATGCACGCGATGAAACAATGAGGGACAATTTGTTTGGCGATCTGCATGTTAAGGCCTACCGCCAAACAGCACGTCTCAATGGAAATATTATTCCACTTAACACTTTTCGCGTTGCGACAGATACTGCATATCTGAGAGGGCGTGTAGCGCAACTGAGAAGAGAACTAGGCGCAGAG…	MYNSIRSAGGEISSGRITSFDELWGRATEWRLSKLQRGAPSYSAFASERTSNTDAVTPLVKPYKSVIARVVSHKDARDETMRDNLFGDLHVKAYRQTARLNGNIIPLNTFRVATDTAYLRGRVAQLRRELGAEAIEQHLRRYNPDRIDHTDAYYLPIIKNHLNNLYRRATSSDLRRADLIDLXAMPDQRGSAAKAEFAARAIASAHGIELPPFRNGKVSDIEAMLSGEEEFVGKYVSLLDSDCF	735	244
PorI_6_AvrB1a_1	PorI_6	AvrB	AvrB	AvrB	AvrB1	15	73	15	ATGGGCTGCGTCTCGTCAAAAGGCAACCCAATGCTTTCTCCGCAGGCTTCTTTTAATGACGCTTCTCGTACGTTTTTCAGAGCACTTCCCGGCCCAGCGGCAAGACAATTGCAGGTCTACGATCAATGCTTAATTGGTGCAGCGCGCTGGCCTGACGATTCCAGTAAGTCGAGCACTCCCGAAAATAGGGCGTATTGTCAGAGCATGTACAACTCAATTCGTTCTGCTGGAGGTGAAATTTCCAGTGGCAGGATCACGTCTTTTGATGAACTATGGGGGCGCGCAACTGAATGGCGACTTTCAAAGTTGCAGAGAGGAGCACCGTCCTATTCTGCGTTTGCCTCTGAAAGGACGTCCAATACAGACGCAGTAACCCCCTTAGTTAAACCTTATAAGTCT…	MGCVSSKGNPMLSPQASFNDASRTFFRALPGPAARQLQVYDQCLIGAARWPDDSSKSSTPENRAYCQSMYNSIRSAGGEISSGRITSFDELWGRATEWRLSKLQRGAPSYSAFASERTSNTDAVTPLVKPYKSVIARVVSHKDARDETMRDNLFGDLHVKAYRQTARLNGNIIPLNTFRVATDTAYLRGRVAQLRRELGAEAIEQHLRRYNPDRIDHTDAYYLPIIKNHLNNLYRRATSSDLRRADLIDLIARTHWWAASAMPDQRGSAAKAEFAARAIASAHGIELPPFRNGKVSDIEAMLSGEEEFVGKYVSLLDSDCF	966	321
PgyICMP807_AvrB1b_1	PgyICMP807	AvrB	AvrB	AvrB	AvrB1	15	73	16	ATGGGCTGCGTCTCGTCAAAAAGCACCACAGTGCTTTCTCCACAGACATCTTTTAATGAAGCCTCCCGTACGTCTTTCAGAGCACTCCCCGGCCCATCGCAAAGACAATTGGAGGTCTATGATCAATGCTTAATTGGTGCAGCGCGCTGGCCTGACGATTCCAGTAAGTCGAATACGCCTGAAAACAGGGCATATTGTCAGAGCATGTACAACTCAATTCGCTCTGCTGGAGATGAAATTTCCAGAGGTGGAATCACATCTTTTGAGGAACTATGGGGGCGCGCAACTGAATGGCGACTTTCAAAGTTGCAGAGAGGAGAGCCGTTATACTCTGCATTCGCCTCCGAAAGGACGTCCGATACAGACGCAGTAACCCCTCTGGTCAAACCTTACAAGTCT…	MGCVSSKSTTVLSPQTSFNEASRTSFRALPGPSQRQLEVYDQCLIGAARWPDDSSKSNTPENRAYCQSMYNSIRSAGDEISRGGITSFEELWGRATEWRLSKLQRGEPLYSAFASERTSDTDAVTPLVKPYKSVLARVVDHEDAHDEIMQDNLFGDLNVKVYRQTAYLHGNVIPLNTFRVATDTEYLRDRVAHLRTELGAKALKQHLQRYNPDRIDHTNASYLPIIKDHLNDLYRQAISSDLSQAELISLIARTHWWAASAMPDQRGSAAKAEFAARAIASAHGIELPPFRNGNVSDIEAMLSGEEEFVEKYRSLLDSDCF	966	321
PgyICMP9589_AvrB1b_1	PgyICMP9589	AvrB	AvrB	AvrB	AvrB1	15	73	16	ATGGGCTGCGTCTCGTCAAAAAGCACCACAGTGCTTTCTCCACAGACATCTTTTAATGAAGCCTCCCGTACGTCTTTCAGAGCACTCCCCGGCCCATCGCAAAGACAATTGGAGGTCTATGATCAATGCTTAATTGGTGCAGCGCGCTGGCCTGACGATTCCAGTAAGTCGAATACGCCTGAAAACAGGGCATATTGTCAGAGCATGTACAACTCAATTCGCTCTGCTGGAGATGAAATTTCCAGAGGTGGAATCACATCTTTTGAGGAACTATGGGGGCGCGCAACTGAATGGCGACTTTCAAAGTTGCAGAGAGGAGAGCCGTTATACTCTGCATTCGCCTCCGAAAGGACGTCCGATACAGACGCAGTAACCCCTCTGGTCAAACCTTACAAGTCT…	MGCVSSKSTTVLSPQTSFNEASRTSFRALPGPSQRQLEVYDQCLIGAARWPDDSSKSNTPENRAYCQSMYNSIRSAGDEISRGGITSFEELWGRATEWRLSKLQRGEPLYSAFASERTSDTDAVTPLVKPYKSVLARVVDHEDAHDEIMQDNLFGDLNVKVYRQTAYLHGNVIPLNTFRVATDTEYLRDRVAHLRTELGAKALKQHLQRYNPDRIDHTNASYLPIIKDHLNDLYRQAISSDLSQAELISLIARTHWWAASAMPDQRGSAAKAEFAARAIASAHGIELPPFRNGNVSDIEAMLSGEEEFVEKYRSLLDSDCF	966	321
Psy0533_AvrB2a_1	Psy0533	AvrB	AvrB	AvrB	AvrB2	15	73	17	ATGGGATGCATTACTTCAAAACCACTGGTTAGCTCTCCCCGGTGGCATAATTCAGCTACTAATTCCGAAAATTTAGAAACTGGTCAAAGAAGCCATAAAGCCTCTCTTTATGGTGCTATTTCTGGATCACCGGAAAGGAGTGAATTGACTTGGCATCAGCAGTCGTTGGTTGGCGTAGCCCGATGGCCTGACAAAGAATATAATAGAGATCATGTCCCCCTGCAAATGGAATACGGTAGGTCTTTTTGGAATGAGTCGCGAAAAATAGGAAGTGCATTAGCTAATGGTGAAATTCAGAATTTTGAAGACTTATGGGAGAAAGCACGCGATTGGCGATGTTCAATGGCTAATCATGATGAGAATATATTTAAGAAACCTCGCAATAGTTATAATGAGTTT…	MGCITSKPLVSSPRWHNSATNSENLETGQRSHKASLYGAISGSPERSELTWHQQSLVGVARWPDKEYNRDHVPLQMEYGRSFWNESRKIGSALANGEIQNFEDLWEKARDWRCSMANHDENIFKKPRNSYNEFPFTTPLINQYNYIKERYSARTDGSLQKLDDEGLLPPAKEFLITDKIFGEPISLTKIVCSSDSSAHRDQRRYSDLWSRGLDYGEPHYIQHTSSEEVPKILHHVNDLFNEVLQSNLSTKKALKFLGEIHWWLAHAMPDERGSAAKSELCVRAIAQAKGLDLPPMKSGIVPDLEAMTMSREQFIKQYPSMFDD	972	323
PcbICMP2823_AvrB2a_1	PcbICMP2823	AvrB	AvrB	AvrB	AvrB2	15	73	18	ATGGGATGCATTACTTCAAAACCACTGGTTAGCTCTCCCCGGTGGCATAATTCAGCTACTAATTCCGAAAATTTAGAAACTGGTCAAAGAAGCCATAAAGCCTCTCGTTATGGTGCTATTTCTGGATCACCGGAAAGGAGTGAATTGACTTGGCATCAGCAGTCGTTGGTTGGCGTAGCCCGATGGCCTGACAAAGAATATAATAGAGATCATGTCCCCCTGCAAATGGAATACGGTAGGTCTTTTTGGAATGAGTCGCGAAAAATAGGAAGTGCATTAGCTAATGGTGAAATTCAGAATTTTGAAGACTTATGGGAGAAAGCACGCGATTGGCGATGTTCAATGGCTAATCATGATGAGAATATATTTAAGAAACCTCGCAATAGTTATAATGAGTTT…	MGCITSKPLVSSPRWHNSATNSENLETGQRSHKASRYGAISGSPERSELTWHQQSLVGVARWPDKEYNRDHVPLQMEYGRSFWNESRKIGSALANGEIQNFEDLWEKARDWRCSMANHDENIFKKPRNSYNEFPFTTPLINQYNYIKERYSSRTDGSLQKLDDEGLLPPAKEFLITDKIFGEPISLTKIVCSSDSSAHRDQRRYSDLWSRGLDYGEPHYIQHTSSEEVPKILHHVNDLFNEVLQSNLSTKKALKFLGEIHWWLAHAMPDERGSAAKSELCVRAIAQAKGLDLPPMKSGIVPDLEAMTMSREQFIKQYPSMFDD	972	323
PseHC_1_AvrB2a_1	PseHC_1	AvrB	AvrB	AvrB	AvrB2	15	73	18	ATGGGATGCATTACTTCAAAACCACTGGTTAGCTCTCCCCGGTGGCATAATTCAGCTACTAATTCCGAAAATTTAGAAACTGGTCAAAGAAGCCATAAAGCCTCTCGTTATGGTGCTATTTCTGGATCACCGGAAAGGAGTGAATTGACTTGGCATCAGCAGTCGTTGGTTGGCGTAGCCCGATGGCCTGACAAAGAATATAATAGAGATCATGTCCCCCTGCAAATGGAATACGGTAGGTCTTTTTGGAATGAGTCGCGAAAAATAGGAAGTGCATTAGCTAATGGTGAAATTCAGAATTTTGAAGACTTATGGGAGAAAGCACGCGATTGGCGATGTTCAATGGCTAATCATGATGAGAATATATTTAAGAAACCTCGCAATAGTTATAATGAGTTT…	MGCITSKPLVSSPRWHNSATNSENLETGQRSHKASRYGAISGSPERSELTWHQQSLVGVARWPDKEYNRDHVPLQMEYGRSFWNESRKIGSALANGEIQNFEDLWEKARDWRCSMANHDENIFKKPRNSYNEFPFTTPLINQYNYIKERYSSRTDGSLQKLDDEGLLPPAKEFLITDKIFGEPISLTKIVCSSDSSAHRDQRRYSDLWSRGLDYGEPHYIQHTSSEEVPKILHHVNDLFNEVLQSNLSTKKALKFLGEIHWWLAHAMPDERGSAAKSELCVRAIAQAKGLDLPPMKSGIVPDLEAMTMSREQFIKQYPSMFDD	972	323
PseICMP3386_AvrB2a_1	PseICMP3386	AvrB	AvrB	AvrB	AvrB2	15	73	18	ATGGGATGCATTACTTCAAAACCACTGGTTAGCTCTCCCCGGTGGCATAATTCAGCTACTAATTCCGAAAATTTAGAAACTGGTCAAAGAAGCCATAAAGCCTCTCGTTATGGTGCTATTTCTGGATCACCGGAAAGGAGTGAATTGACTTGGCATCAGCAGTCGTTGGTTGGCGTAGCCCGATGGCCTGACAAAGAATATAATAGAGATCATGTCCCCCTGCAAATGGAATACGGTAGGTCTTTTTGGAATGAGTCGCGAAAAATAGGAAGTGCATTAGCTAATGGTGAAATTCAGAATTTTGAAGACTTATGGGAGAAAGCACGCGATTGGCGATGTTCAATGGCTAATCATGATGAGAATATATTTAAGAAACCTCGCAATAGTTATAATGAGTTT…	MGCITSKPLVSSPRWHNSATNSENLETGQRSHKASRYGAISGSPERSELTWHQQSLVGVARWPDKEYNRDHVPLQMEYGRSFWNESRKIGSALANGEIQNFEDLWEKARDWRCSMANHDENIFKKPRNSYNEFPFTTPLINQYNYIKERYSSRTDGSLQKLDDEGLLPPAKEFLITDKIFGEPISLTKIVCSSDSSAHRDQRRYSDLWSRGLDYGEPHYIQHTSSEEVPKILHHVNDLFNEVLQSNLSTKKALKFLGEIHWWLAHAMPDERGSAAKSELCVRAIAQAKGLDLPPMKSGIVPDLEAMTMSREQFIKQYPSMFDD	972	323
PseICMP7459_AvrB2a_1	PseICMP7459	AvrB	AvrB	AvrB	AvrB2	15	73	18	ATGGGATGCATTACTTCAAAACCACTGGTTAGCTCTCCCCGGTGGCATAATTCAGCTACTAATTCCGAAAATTTAGAAACTGGTCAAAGAAGCCATAAAGCCTCTCGTTATGGTGCTATTTCTGGATCACCGGAAAGGAGTGAATTGACTTGGCATCAGCAGTCGTTGGTTGGCGTAGCCCGATGGCCTGACAAAGAATATAATAGAGATCATGTCCCCCTGCAAATGGAATACGGTAGGTCTTTTTGGAATGAGTCGCGAAAAATAGGAAGTGCATTAGCTAATGGTGAAATTCAGAATTTTGAAGACTTATGGGAGAAAGCACGCGATTGGCGATGTTCAATGGCTAATCATGATGAGAATATATTTAAGAAACCTCGCAATAGTTATAATGAGTTT…	MGCITSKPLVSSPRWHNSATNSENLETGQRSHKASRYGAISGSPERSELTWHQQSLVGVARWPDKEYNRDHVPLQMEYGRSFWNESRKIGSALANGEIQNFEDLWEKARDWRCSMANHDENIFKKPRNSYNEFPFTTPLINQYNYIKERYSSRTDGSLQKLDDEGLLPPAKEFLITDKIFGEPISLTKIVCSSDSSAHRDQRRYSDLWSRGLDYGEPHYIQHTSSEEVPKILHHVNDLFNEVLQSNLSTKKALKFLGEIHWWLAHAMPDERGSAAKSELCVRAIAQAKGLDLPPMKSGIVPDLEAMTMSREQFIKQYPSMFDD	972	323
PseICMP763_AvrB2a_1	PseICMP763	AvrB	AvrB	AvrB	AvrB2	15	73	18	ATGGGATGCATTACTTCAAAACCACTGGTTAGCTCTCCCCGGTGGCATAATTCAGCTACTAATTCCGAAAATTTAGAAACTGGTCAAAGAAGCCATAAAGCCTCTCGTTATGGTGCTATTTCTGGATCACCGGAAAGGAGTGAATTGACTTGGCATCAGCAGTCGTTGGTTGGCGTAGCCCGATGGCCTGACAAAGAATATAATAGAGATCATGTCCCCCTGCAAATGGAATACGGTAGGTCTTTTTGGAATGAGTCGCGAAAAATAGGAAGTGCATTAGCTAATGGTGAAATTCAGAATTTTGAAGACTTATGGGAGAAAGCACGCGATTGGCGATGTTCAATGGCTAATCATGATGAGAATATATTTAAGAAACCTCGCAATAGTTATAATGAGTTT…	MGCITSKPLVSSPRWHNSATNSENLETGQRSHKASRYGAISGSPERSELTWHQQSLVGVARWPDKEYNRDHVPLQMEYGRSFWNESRKIGSALANGEIQNFEDLWEKARDWRCSMANHDENIFKKPRNSYNEFPFTTPLINQYNYIKERYSSRTDGSLQKLDDEGLLPPAKEFLITDKIFGEPISLTKIVCSSDSSAHRDQRRYSDLWSRGLDYGEPHYIQHTSSEEVPKILHHVNDLFNEVLQSNLSTKKALKFLGEIHWWLAHAMPDERGSAAKSELCVRAIAQAKGLDLPPMKSGIVPDLEAMTMSREQFIKQYPSMFDD	972	323
PcsICMP9419_AvrB2a_1	PcsICMP9419	AvrB	AvrB	AvrB	AvrB2	15	73	19	ATGGGATGCATTACTTCAAAACCACTGGTTAGCTCTCCCCGGTGGCATAATTCAGCTACTAATTCCGAAAATTTAGAAACTGGTCAAAGAAGCCATAAAGCCTCTCTTTATGGTGCTATTTCTGGATCACCGGAAAGGAGTGAATTGACTTGGCATCAGCAGTCGTTGGTTGGCGTAGCCCGATGGCCTGACAAAGAATATAATAGAGATCATGTCCCCCTGCAAATGGAATACGGTAGGTCTTTTTGGAATGAGTCGCGAAAAATAGGAAGTGCATTAGCTAATGGTGAAATTCAGAATTTTGAAGACTTATGGGAGAAAGCACGCGATTGGCGATATTCAATGGCTAATCATGATGAGAATATATTTAAGAAACCTCGCAATAGTTATAATGAGTTT…	MGCITSKPLVSSPRWHNSATNSENLETGQRSHKASLYGAISGSPERSELTWHQQSLVGVARWPDKEYNRDHVPLQMEYGRSFWNESRKIGSALANGEIQNFEDLWEKARDWRYSMANHDENIFKKPRNSYNEFPFTTPLINQYNYIKERYSARTDGSLQKLDDEGLLPPAKEFLITDKIFGEPISLTKIVCSSDSSAHRDQRRYSDLWSRGLDYGEPHYIQHTSSEEVPKILHHVNDLFNEVLQSNLSTKKALKFLGEIHWWLAHAMPDERGSAAKSELCVRAIAQAKGLGKV	882	293
PcsICMP9420_AvrB2a_1	PcsICMP9420	AvrB	AvrB	AvrB	AvrB2	15	73	19	ATGGGATGCATTACTTCAAAACCACTGGTTAGCTCTCCCCGGTGGCATAATTCAGCTACTAATTCCGAAAATTTAGAAACTGGTCAAAGAAGCCATAAAGCCTCTCTTTATGGTGCTATTTCTGGATCACCGGAAAGGAGTGAATTGACTTGGCATCAGCAGTCGTTGGTTGGCGTAGCCCGATGGCCTGACAAAGAATATAATAGAGATCATGTCCCCCTGCAAATGGAATACGGTAGGTCTTTTTGGAATGAGTCGCGAAAAATAGGAAGTGCATTAGCTAATGGTGAAATTCAGAATTTTGAAGACTTATGGGAGAAAGCACGCGATTGGCGATATTCAATGGCTAATCATGATGAGAATATATTTAAGAAACCTCGCAATAGTTATAATGAGTTT…	MGCITSKPLVSSPRWHNSATNSENLETGQRSHKASLYGAISGSPERSELTWHQQSLVGVARWPDKEYNRDHVPLQMEYGRSFWNESRKIGSALANGEIQNFEDLWEKARDWRYSMANHDENIFKKPRNSYNEFPFTTPLINQYNYIKERYSARTDGSLQKLDDEGLLPPAKEFLITDKIFGEPISLTKIVCSSDSSAHRDQRRYSDLWSRGLDYGEPHYIQHTSSEEVPKILHHVNDLFNEVLQSNLSTKKALKFLGEIHWWLAHAMPDERGSAAKSELCVRAIAQAKGLGKV	882	293
PgyB076_AvrB2a_1	PgyB076	AvrB	AvrB	AvrB	AvrB2	15	73	20	ATGGGATGCATTACTTCAAAACCACTGGTTAGCTCTCCCCAGTGGCATAATTCAGCTACTAATTCCGAAAATTTAGAAACTGGTCAAAGAAGCCATAAAGCCTCTCTTTATGGTGCTATGTCTGGATCACCGGAAAGGAGTGAATTGACTTGGCATCAGCAGTCGTTGGTTGGCGTAGCCCGATGGCCTGACAAAGAATATAATAGAGATCATGTCCCCCTGCAAATGGAATACGGTAGGTCTTTTTGGAATGAGTCGCGAAAAATAGGAAGTGCATTAGCTAATGGTGAAATTCAGAATTTTGAAGACTTATGGGAGAAAGCACGCGATTGGCGATGTTCAATGGCTAATCATGATGAGAATATATTTAAGAAACCTCGCAATAGTTATAATGAGTTT…	MGCITSKPLVSSPQWHNSATNSENLETGQRSHKASLYGAMSGSPERSELTWHQQSLVGVARWPDKEYNRDHVPLQMEYGRSFWNESRKIGSALANGEIQNFEDLWEKARDWRCSMANHDENIFKKPRNSYNEFPFTTPLINQYNYIKERYSARTDGSLQKLDDEGLLPPAKEFLITDKIFGEPISLTKIVCSSDSSAHRDQRRYSDLWSRGLDYGEPHYIQHTSSEEVPKILHHVNDLFNEVLQSNLSTKKALKFLGEIHWWLAHAMPDERGSAAKSELCVRAIAQAKGLDLPPMKSGIVPDLEAMTMSREQFIKQYPSMFDD	972	323
PgyR4_AvrB2a_1	PgyR4	AvrB	AvrB	AvrB	AvrB2	15	73	20	ATGGGATGCATTACTTCAAAACCACTGGTTAGCTCTCCCCAGTGGCATAATTCAGCTACTAATTCCGAAAATTTAGAAACTGGTCAAAGAAGCCATAAAGCCTCTCTTTATGGTGCTATGTCTGGATCACCGGAAAGGAGTGAATTGACTTGGCATCAGCAGTCGTTGGTTGGCGTAGCCCGATGGCCTGACAAAGAATATAATAGAGATCATGTCCCCCTGCAAATGGAATACGGTAGGTCTTTTTGGAATGAGTCGCGAAAAATAGGAAGTGCATTAGCTAATGGTGAAATTCAGAATTTTGAAGACTTATGGGAGAAAGCACGCGATTGGCGATGTTCAATGGCTAATCATGATGAGAATATATTTAAGAAACCTCGCAATAGTTATAATGAGTTT…	MGCITSKPLVSSPQWHNSATNSENLETGQRSHKASLYGAMSGSPERSELTWHQQSLVGVARWPDKEYNRDHVPLQMEYGRSFWNESRKIGSALANGEIQNFEDLWEKARDWRCSMANHDENIFKKPRNSYNEFPFTTPLINQYNYIKERYSARTDGSLQKLDDEGLLPPAKEFLITDKIFGEPISLTKIVCSSDSSAHRDQRRYSDLWSRGLDYGEPHYIQHTSSEEVPKILHHVNDLFNEVLQSNLSTKKALKFLGEIHWWLAHAMPDERGSAAKSELCVRAIAQAKGLDLPPMKSGIVPDLEAMTMSREQFIKQYPSMFDD	972	323
PmeN6801_AvrB2a_1	PmeN6801	AvrB	AvrB	AvrB	AvrB2	15	73	20	ATGGGATGCATTACTTCAAAACCACTGGTTAGCTCTCCCCAGTGGCATAATTCAGCTACTAATTCCGAAAATTTAGAAACTGGTCAAAGAAGCCATAAAGCCTCTCTTTATGGTGCTATGTCTGGATCACCGGAAAGGAGTGAATTGACTTGGCATCAGCAGTCGTTGGTTGGCGTAGCCCGATGGCCTGACAAAGAATATAATAGAGATCATGTCCCCCTGCAAATGGAATACGGTAGGTCTTTTTGGAATGAGTCGCGAAAAATAGGAAGTGCATTAGCTAATGGTGAAATTCAGAATTTTGAAGACTTATGGGAGAAAGCACGCGATTGGCGATGTTCAATGGCTAATCATGATGAGAATATATTTAAGAAACCTCGCAATAGTTATAATGAGTTT…	MGCITSKPLVSSPQWHNSATNSENLETGQRSHKASLYGAMSGSPERSELTWHQQSLVGVARWPDKEYNRDHVPLQMEYGRSFWNESRKIGSALANGEIQNFEDLWEKARDWRCSMANHDENIFKKPRNSYNEFPFTTPLINQYNYIKERYSARTDGSLQKLDDEGLLPPAKEFLITDKIFGEPISLTKIVCSSDSSAHRDQRRYSDLWSRGLDYGEPHYIQHTSSEEVPKILHHVNDLFNEVLQSNLSTKKALKFLGEIHWWLAHAMPDERGSAAKSELCVRAIAQAKGLDLPPMKSGIVPDLEAMTMSREQFIKQYPSMFDD	972	323
Pph1302A_AvrB2a_1	Pph1302A	AvrB	AvrB	AvrB	AvrB2	15	73	20	ATGGGATGCATTACTTCAAAACCACTGGTTAGCTCTCCCCAGTGGCATAATTCAGCTACTAATTCCGAAAATTTAGAAACTGGTCAAAGAAGCCATAAAGCCTCTCTTTATGGTGCTATGTCTGGATCACCGGAAAGGAGTGAATTGACTTGGCATCAGCAGTCGTTGGTTGGCGTAGCCCGATGGCCTGACAAAGAATATAATAGAGATCATGTCCCCCTGCAAATGGAATACGGTAGGTCTTTTTGGAATGAGTCGCGAAAAATAGGAAGTGCATTAGCTAATGGTGAAATTCAGAATTTTGAAGACTTATGGGAGAAAGCACGCGATTGGCGATGTTCAATGGCTAATCATGATGAGAATATATTTAAGAAACCTCGCAATAGTTATAATGAGTTT…	MGCITSKPLVSSPQWHNSATNSENLETGQRSHKASLYGAMSGSPERSELTWHQQSLVGVARWPDKEYNRDHVPLQMEYGRSFWNESRKIGSALANGEIQNFEDLWEKARDWRCSMANHDENIFKKPRNSYNEFPFTTPLINQYNYIKERYSARTDGSLQKLDDEGLLPPAKEFLITDKIFGEPISLTKIVCSSDSSAHRDQRRYSDLWSRGLDYGEPHYIQHTSSEEVPKILHHVNDLFNEVLQSNLSTKKALKFLGEIHWWLAHAMPDERGSAAKSELCVRAIAQAKGLDLPPMKSGIVPDLEAMTMSREQFIKQYPSMFDD	972	323
Pph1448A_AvrB2a_2	Pph1448A	AvrB	AvrB	AvrB	AvrB2	15	73	20	ATGGGATGCATTACTTCAAAACCACTGGTTAGCTCTCCCCAGTGGCATAATTCAGCTACTAATTCCGAAAATTTAGAAACTGGTCAAAGAAGCCATAAAGCCTCTCTTTATGGTGCTATGTCTGGATCACCGGAAAGGAGTGAATTGACTTGGCATCAGCAGTCGTTGGTTGGCGTAGCCCGATGGCCTGACAAAGAATATAATAGAGATCATGTCCCCCTGCAAATGGAATACGGTAGGTCTTTTTGGAATGAGTCGCGAAAAATAGGAAGTGCATTAGCTAATGGTGAAATTCAGAATTTTGAAGACTTATGGGAGAAAGCACGCGATTGGCGATGTTCAATGGCTAATCATGATGAGAATATATTTAAGAAACCTCGCAATAGTTATAATGAGTTT…	MGCITSKPLVSSPQWHNSATNSENLETGQRSHKASLYGAMSGSPERSELTWHQQSLVGVARWPDKEYNRDHVPLQMEYGRSFWNESRKIGSALANGEIQNFEDLWEKARDWRCSMANHDENIFKKPRNSYNEFPFTTPLINQYNYIKERYSARTDGSLQKLDDEGLLPPAKEFLITDKIFGEPISLTKIVCSSDSSAHRDQRRYSDLWSRGLDYGEPHYIQHTSSEEVPKILHHVNDLFNEVLQSNLSTKKALKFLGEIHWWLAHAMPDERGSAAKSELCVRAIAQAKGLDLPPMKSGIVPDLEAMTMSREQFIKQYPSMFDD	972	323
Psy0510_AvrB2a_1	Psy0510	AvrB	AvrB	AvrB	AvrB2	15	73	20	ATGGGATGCATTACTTCAAAACCACTGGTTAGCTCTCCCCAGTGGCATAATTCAGCTACTAATTCCGAAAATTTAGAAACTGGTCAAAGAAGCCATAAAGCCTCTCTTTATGGTGCTATGTCTGGATCACCGGAAAGGAGTGAATTGACTTGGCATCAGCAGTCGTTGGTTGGCGTAGCCCGATGGCCTGACAAAGAATATAATAGAGATCATGTCCCCCTGCAAATGGAATACGGTAGGTCTTTTTGGAATGAGTCGCGAAAAATAGGAAGTGCATTAGCTAATGGTGAAATTCAGAATTTTGAAGACTTATGGGAGAAAGCACGCGATTGGCGATGTTCAATGGCTAATCATGATGAGAATATATTTAAGAAACCTCGCAATAGTTATAATGAGTTT…	MGCITSKPLVSSPQWHNSATNSENLETGQRSHKASLYGAMSGSPERSELTWHQQSLVGVARWPDKEYNRDHVPLQMEYGRSFWNESRKIGSALANGEIQNFEDLWEKARDWRCSMANHDENIFKKPRNSYNEFPFTTPLINQYNYIKERYSARTDGSLQKLDDEGLLPPAKEFLITDKIFGEPISLTKIVCSSDSSAHRDQRRYSDLWSRGLDYGEPHYIQHTSSEEVPKILHHVNDLFNEVLQSNLSTKKALKFLGEIHWWLAHAMPDERGSAAKSELCVRAIAQAKGLDLPPMKSGIVPDLEAMTMSREQFIKQYPSMFDD	972	323
Psy0511_AvrB2a_1	Psy0511	AvrB	AvrB	AvrB	AvrB2	15	73	20	ATGGGATGCATTACTTCAAAACCACTGGTTAGCTCTCCCCAGTGGCATAATTCAGCTACTAATTCCGAAAATTTAGAAACTGGTCAAAGAAGCCATAAAGCCTCTCTTTATGGTGCTATGTCTGGATCACCGGAAAGGAGTGAATTGACTTGGCATCAGCAGTCGTTGGTTGGCGTAGCCCGATGGCCTGACAAAGAATATAATAGAGATCATGTCCCCCTGCAAATGGAATACGGTAGGTCTTTTTGGAATGAGTCGCGAAAAATAGGAAGTGCATTAGCTAATGGTGAAATTCAGAATTTTGAAGACTTATGGGAGAAAGCACGCGATTGGCGATGTTCAATGGCTAATCATGATGAGAATATATTTAAGAAACCTCGCAATAGTTATAATGAGTTT…	MGCITSKPLVSSPQWHNSATNSENLETGQRSHKASLYGAMSGSPERSELTWHQQSLVGVARWPDKEYNRDHVPLQMEYGRSFWNESRKIGSALANGEIQNFEDLWEKARDWRCSMANHDENIFKKPRNSYNEFPFTTPLINQYNYIKERYSARTDGSLQKLDDEGLLPPAKEFLITDKIFGEPISLTKIVCSSDSSAHRDQRRYSDLWSRGLDYGEPHYIQHTSSEEVPKILHHVNDLFNEVLQSNLSTKKALKFLGEIHWWLAHAMPDERGSAAKSELCVRAIAQAKGLDLPPMKSGIVPDLEAMTMSREQFIKQYPSMFDD	972	323
Psy0512_AvrB2a_1	Psy0512	AvrB	AvrB	AvrB	AvrB2	15	73	20	ATGGGATGCATTACTTCAAAACCACTGGTTAGCTCTCCCCAGTGGCATAATTCAGCTACTAATTCCGAAAATTTAGAAACTGGTCAAAGAAGCCATAAAGCCTCTCTTTATGGTGCTATGTCTGGATCACCGGAAAGGAGTGAATTGACTTGGCATCAGCAGTCGTTGGTTGGCGTAGCCCGATGGCCTGACAAAGAATATAATAGAGATCATGTCCCCCTGCAAATGGAATACGGTAGGTCTTTTTGGAATGAGTCGCGAAAAATAGGAAGTGCATTAGCTAATGGTGAAATTCAGAATTTTGAAGACTTATGGGAGAAAGCACGCGATTGGCGATGTTCAATGGCTAATCATGATGAGAATATATTTAAGAAACCTCGCAATAGTTATAATGAGTTT…	MGCITSKPLVSSPQWHNSATNSENLETGQRSHKASLYGAMSGSPERSELTWHQQSLVGVARWPDKEYNRDHVPLQMEYGRSFWNESRKIGSALANGEIQNFEDLWEKARDWRCSMANHDENIFKKPRNSYNEFPFTTPLINQYNYIKERYSARTDGSLQKLDDEGLLPPAKEFLITDKIFGEPISLTKIVCSSDSSAHRDQRRYSDLWSRGLDYGEPHYIQHTSSEEVPKILHHVNDLFNEVLQSNLSTKKALKFLGEIHWWLAHAMPDERGSAAKSELCVRAIAQAKGLDLPPMKSGIVPDLEAMTMSREQFIKQYPSMFDD	972	323
Psy0513_AvrB2a_1	Psy0513	AvrB	AvrB	AvrB	AvrB2	15	73	20	ATGGGATGCATTACTTCAAAACCACTGGTTAGCTCTCCCCAGTGGCATAATTCAGCTACTAATTCCGAAAATTTAGAAACTGGTCAAAGAAGCCATAAAGCCTCTCTTTATGGTGCTATGTCTGGATCACCGGAAAGGAGTGAATTGACTTGGCATCAGCAGTCGTTGGTTGGCGTAGCCCGATGGCCTGACAAAGAATATAATAGAGATCATGTCCCCCTGCAAATGGAATACGGTAGGTCTTTTTGGAATGAGTCGCGAAAAATAGGAAGTGCATTAGCTAATGGTGAAATTCAGAATTTTGAAGACTTATGGGAGAAAGCACGCGATTGGCGATGTTCAATGGCTAATCATGATGAGAATATATTTAAGAAACCTCGCAATAGTTATAATGAGTTT…	MGCITSKPLVSSPQWHNSATNSENLETGQRSHKASLYGAMSGSPERSELTWHQQSLVGVARWPDKEYNRDHVPLQMEYGRSFWNESRKIGSALANGEIQNFEDLWEKARDWRCSMANHDENIFKKPRNSYNEFPFTTPLINQYNYIKERYSARTDGSLQKLDDEGLLPPAKEFLITDKIFGEPISLTKIVCSSDSSAHRDQRRYSDLWSRGLDYGEPHYIQHTSSEEVPKILHHVNDLFNEVLQSNLSTKKALKFLGEIHWWLAHAMPDERGSAAKSELCVRAIAQAKGLDLPPMKSGIVPDLEAMTMSREQFIKQYPSMFDD	972	323
PgyICMP2185_AvrB2a_1	PgyICMP2185	AvrB	AvrB	AvrB	AvrB2	15	73	21	ATGGGATGCATTACTTCAAAACCACTGGTTAGCTCTCCCCAGTGGCATAATTCAGCTACTAATTCCGAAAATTTAGAAACTGGTCAAAGAAGCCATAAAGCCTCTCTTTATGGTGCTATGTCTGGATCACCGGAAAGGAGTGAATTGACTTGGCATCAGCAGTCGTTGGTTGGCGTAGCCCGATGGCCTGACAAAGAATATAATAGAGATCATGTCCCCCTGCAAATGGAATACGGTAGGTCTTTTTGGAATGAGTCGCGAAAAATAGGAAGTGCATTAGCTAATGGTGAAATTCAGAATTTTGAAGACTTATGGGAGAAAGCACGCGATTGGCGATGTTCAATGGCTAATCATGATGAGAATATATTTAAGAAACCTCGCAATAGTTATAATGAGTTT…	MGCITSKPLVSSPQWHNSATNSENLETGQRSHKASLYGAMSGSPERSELTWHQQSLVGVARWPDKEYNRDHVPLQMEYGRSFWNESRKIGSALANGEIQNFEDLWEKARDWRCSMANHDENIFKKPRNSYNEFPFTTPLINQYNYIKERYSARTDGSLQKLDDEGLLPPAKEFLITDKIFGEPISLTKIVCSSDSSAHRDQRRYSDLWSRGLDYGEPHYIQHTSSEEVPKILHHVNDLFNEVLQSNLSTKKALKFLGEIHWWLAHAMPDERGSAAKSELCVRAIAQAKGLDLPPMKSGIVPDLEAMTMSREQFIKQYPSMFDD	972	323
PgyICMP4324_AvrB2a_1	PgyICMP4324	AvrB	AvrB	AvrB	AvrB2	15	73	22	ATGGGATGCATTACTTCAAAACCACTGGTTAGCTCTCCCCAGTGGCATAATTCAGCTACTAATTCCGAAAATTTAGAAACTGGTCAAAGAAGCCATAAAGCCTCTCTTTATGGTGCTATGTCTGGATCACCGGAAAGGAGTGAATTGACTTGGCATCAGCAGTCGTTGGTTGGCGTAGCCCGATGGCCTGACAAAGAATATAATAGAGATCATGTCCCCCTGCAAATGGAATACGGTAGGTCTTTTTGGAATGAGTCGCGAAAAATAGGAAGTGCATTAGCTAATGGTGAAATTCAGAATTTTGAAGACTTATGGGAGAAAGCACGCGATTGGCGATGTTCAATGGCTAATCATGATGAGAATATATTTAAGAAACCTCGCAATAGTTATAATGAGTTT…	MGCITSKPLVSSPQWHNSATNSENLETGQRSHKASLYGAMSGSPERSELTWHQQSLVGVARWPDKEYNRDHVPLQMEYGRSFWNESRKIGSALANGEIQNFEDLWEKARDWRCSMANHDENIFKKPRNSYNEFPFTTPLINQYNYIKERYSARTDGSLQKLDDEGLLPPAKEFLITDKIFGEPISLTKIVCSSDSSAHRDQRRYSDLWSRGLDYGEPHYIQHTSSEEVPKILHHVNDLFNEVLQSNLSTKKALKFLGEIHWWLAHAMPDERGSAAKSELCVRAIAQAKGLGIL	882	293
PgyICMP4332_AvrB2a_1	PgyICMP4332	AvrB	AvrB	AvrB	AvrB2	15	73	23	ATGGGATGCATTACTTCAAAACCACTGGTTAGCTCTCCCCGGTGGCATAATTCAGCTACTAATTCCGAAAATTTAGAAACTGGTCAAAGAAGCCATAAAGCCTCTCTTTATGGTGCTATGTCTGGATCACCGGAAAGGAGTGAATTGACTTGGCATCAGCAGTCGTTGGTTGGCGTAGCCCGATGGCCTGACAAAGAATATAATAGAGATCATGTCCCCCTGCAAATGGAATACGGTAGGTCTTTTTGGAATGAGTCGCGAAAAATAGGAAGTGCATTAGCTAATGGTGAAATTCAGAATTTTGAAGACTTATGGGAGAAAGCACGCGATTGGCGATGTTCAATGGCTAATCATGATGAGAATATATTTAAGAAACCTCGCAATAGTTATAATGAGTTT…	MGCITSKPLVSSPRWHNSATNSENLETGQRSHKASLYGAMSGSPERSELTWHQQSLVGVARWPDKEYNRDHVPLQMEYGRSFWNESRKIGSALANGEIQNFEDLWEKARDWRCSMANHDENIFKKPRNSYNEFPFTTPLINQYNYIKERYSARTDGSLQKLDDEGLLPPAKEFLITDKIFGEPISLTKIVCSSDSSAHRDQRRYSDLWSRGLDYGEPHYIQHTSSEEVPKILHHVNDLFNEVLQSNLSTKKALKFLGEIHWWLAHAMPDERGSAAKSELCVRAIAQAKGLDLPPMKSGIVPDLEAMTMSREQFIKQYPSMFDD	972	323
PgyICMP4333_AvrB2a_1	PgyICMP4333	AvrB	AvrB	AvrB	AvrB2	15	73	24	ATGGGATGCATTACTTCAAAACCACTGGTTAGCTCTCCCCAGTGGCATAATTCAGCTACTAATTCCGAAAATTTAGAAACTGGTCAAAGAAGCCATAAAGCCTCTCTTTATGGTGCTATGTCTGGATCACCGGAAAGGAGTGAATTGACTTGGCATCAGCAGTCGTTGGTTGGCGTAGCCCGATGGCCTGACAAAGAATATAATAGAGATCATGTCCCCCTGCAAATGGAATACGGTAGGTCTTTTTGGAATGAGTCGCGAAAAATAGGAAGTGCATTAGCTAATGGTGAAATTCAGAATTTTGAAGACTTATGGGAGAAAGCACGCGATTGGCGATGTTCAATGGCTAATCATGATGAGAATATATTTAAGAAACCTCGCAATAGTTATAATGAGTTT…	MGCITSKPLVSSPQWHNSATNSENLETGQRSHKASLYGAMSGSPERSELTWHQQSLVGVARWPDKEYNRDHVPLQMEYGRSFWNESRKIGSALANGEIQNFEDLWEKARDWRCSMANHDENIFKKPRNSYNEFPFTTPLINQYNYIKERYSARTDGSLQKLDDEGLLPPAKEFLITDKIFGEPISLTKIVCSSDSSAHRDQRRYSDLWSRGLDYGEPHYIQHTSSEEVPKILHHVNDLFDEVLQSNLSTKKALKFLGEIHWWLAHAMPDERGSAAKSELCVRAIAQAKGLDLPPMKSGIVPDLEAMTMSREQFIKQYPSMFDD	972	323
Psy0517_AvrB2a_1	Psy0517	AvrB	AvrB	AvrB	AvrB2	15	73	24	ATGGGATGCATTACTTCAAAACCACTGGTTAGCTCTCCCCAGTGGCATAATTCAGCTACTAATTCCGAAAATTTAGAAACTGGTCAAAGAAGCCATAAAGCCTCTCTTTATGGTGCTATGTCTGGATCACCGGAAAGGAGTGAATTGACTTGGCATCAGCAGTCGTTGGTTGGCGTAGCCCGATGGCCTGACAAAGAATATAATAGAGATCATGTCCCCCTGCAAATGGAATACGGTAGGTCTTTTTGGAATGAGTCGCGAAAAATAGGAAGTGCATTAGCTAATGGTGAAATTCAGAATTTTGAAGACTTATGGGAGAAAGCACGCGATTGGCGATGTTCAATGGCTAATCATGATGAGAATATATTTAAGAAACCTCGCAATAGTTATAATGAGTTT…	MGCITSKPLVSSPQWHNSATNSENLETGQRSHKASLYGAMSGSPERSELTWHQQSLVGVARWPDKEYNRDHVPLQMEYGRSFWNESRKIGSALANGEIQNFEDLWEKARDWRCSMANHDENIFKKPRNSYNEFPFTTPLINQYNYIKERYSARTDGSLQKLDDEGLLPPAKEFLITDKIFGEPISLTKIVCSSDSSAHRDQRRYSDLWSRGLDYGEPHYIQHTSSEEVPKILHHVNDLFDEVLQSNLSTKKALKFLGEIHWWLAHAMPDERGSAAKSELCVRAIAQAKGLDLPPMKSGIVPDLEAMTMSREQFIKQYPSMFDD	972	323
PgyICMP9923_AvrB2a_1	PgyICMP9923	AvrB	AvrB	AvrB	AvrB2	15	73	25	ATGGGATGCATTACTTCAAAACCACTGGTTAGCTCTCCCCAGTGGCATAATTCAGCTACTAATTCCGAAAATTTAGAAACTGGTCAAAGAAGCCATAAAGCCTCTCTTTATGGTGCTATGTCTGGATCACCGGAAAGGAGTGAATTGACTTGGCATCAGCAGTCGTTGGTTGGCGTAGCCCGATGGCCTGACAAAGAATATAATAGAGATCATGTCCCCCTGCAAATGGAATACGGTAGGTCTTTTTGGAATGAGTCGCGAAAAATAGGAAGTGCATTAGCTAATGGTGAAATTCAGAATTTTGAAGACTTATGGGAGAAAGCACGCGATTGGCGATGTTCAATGGCTAATCATGATGAGAATATATTTAAGAAACCTCGCAATAGTTATAATGAGTTT…	MGCITSKPLVSSPQWHNSATNSENLETGQRSHKASLYGAMSGSPERSELTWHQQSLVGVARWPDKEYNRDHVPLQMEYGRSFWNESRKIGSALANGEIQNFEDLWEKARDWRCSMANHDENIFKKPRNSYNEFPFTTPLINQYNYIKERYSARTDGSLQKLDDEGLLPPAKEFLITDKIFGEPISLTKIVCSSDSSAHRDQRRYSDLWSRGLDYGEPHYIQHTSSEEVPKILHHVNDLFNEVLQSNLSTKKALKFLGEIHWWLAHAMPDERGSAAKSELRVRAIAQAKGLDLPPMKSGIVPDLEAMTMSREQFIKQYPSMFDD	972	323
PlaICMP1448_AvrB2a_1	PlaICMP1448	AvrB	AvrB	AvrB	AvrB2	15	73	26	ATGGGATGCATTACTTCAAAACCACTGGTTAGCTCTCCCCGGTGGCATAATTCAGCTACTAATTCCGAAAATTTAGAAACTGGTCAAAGAAGCCATAAAGCCTCTCGTTATGGTGCTATTTCTGGATCACCGGAAAGGAGTGAATTGACTTGGCATCAGCAGTCGTTGGTTGGCGTAGCCCGATGGCCTGACAAAGAATATAATAGAGATCATGTCCCCCTGCAAATGGAATACGGTAGGTCTTTTTGGAATGAGTCGCGAAAAATAGGAAGTGCATTAGCTAATGGTGAAATTCAGAATTTTGAAGACTTATGGGAGAAAGCACGCGATTGGCGATGTTCAATGGCTAATCATGATGAGAATATATTTAAGAAACCTCGCAATAGTTATAATGAGTTT…	MGCITSKPLVSSPRWHNSATNSENLETGQRSHKASRYGAISGSPERSELTWHQQSLVGVARWPDKEYNRDHVPLQMEYGRSFWNESRKIGSALANGEIQNFEDLWEKARDWRCSMANHDENIFKKPRNSYNEFLFTTPLINQYNYIKERYSSRTDGSLQKLDDEGLLPPAKEFLITDKIFGEPISLTKIVCSSDSSAHRDQRRYSDLWSRGLDYGEPHYIQHTSSEEVPKILHHVNDLFNEVLQSNLSTKKALKFLGEIHWWLAHAMPDERGSAAKSELCVRAIAQAKGLDLPPMKSGIVPDLEAMTMSREQFIKQYPSMFDD	972	323
PlaICMP3402_AvrB2a_1	PlaICMP3402	AvrB	AvrB	AvrB	AvrB2	15	73	26	ATGGGATGCATTACTTCAAAACCACTGGTTAGCTCTCCCCGGTGGCATAATTCAGCTACTAATTCCGAAAATTTAGAAACTGGTCAAAGAAGCCATAAAGCCTCTCGTTATGGTGCTATTTCTGGATCACCGGAAAGGAGTGAATTGACTTGGCATCAGCAGTCGTTGGTTGGCGTAGCCCGATGGCCTGACAAAGAATATAATAGAGATCATGTCCCCCTGCAAATGGAATACGGTAGGTCTTTTTGGAATGAGTCGCGAAAAATAGGAAGTGCATTAGCTAATGGTGAAATTCAGAATTTTGAAGACTTATGGGAGAAAGCACGCGATTGGCGATGTTCAATGGCTAATCATGATGAGAATATATTTAAGAAACCTCGCAATAGTTATAATGAGTTT…	MGCITSKPLVSSPRWHNSATNSENLETGQRSHKASRYGAISGSPERSELTWHQQSLVGVARWPDKEYNRDHVPLQMEYGRSFWNESRKIGSALANGEIQNFEDLWEKARDWRCSMANHDENIFKKPRNSYNEFLFTTPLINQYNYIKERYSSRTDGSLQKLDDEGLLPPAKEFLITDKIFGEPISLTKIVCSSDSSAHRDQRRYSDLWSRGLDYGEPHYIQHTSSEEVPKILHHVNDLFNEVLQSNLSTKKALKFLGEIHWWLAHAMPDERGSAAKSELCVRAIAQAKGLDLPPMKSGIVPDLEAMTMSREQFIKQYPSMFDD	972	323
PlaICMP826_AvrB2a_1	PlaICMP826	AvrB	AvrB	AvrB	AvrB2	15	73	26	ATGGGATGCATTACTTCAAAACCACTGGTTAGCTCTCCCCGGTGGCATAATTCAGCTACTAATTCCGAAAATTTAGAAACTGGTCAAAGAAGCCATAAAGCCTCTCGTTATGGTGCTATTTCTGGATCACCGGAAAGGAGTGAATTGACTTGGCATCAGCAGTCGTTGGTTGGCGTAGCCCGATGGCCTGACAAAGAATATAATAGAGATCATGTCCCCCTGCAAATGGAATACGGTAGGTCTTTTTGGAATGAGTCGCGAAAAATAGGAAGTGCATTAGCTAATGGTGAAATTCAGAATTTTGAAGACTTATGGGAGAAAGCACGCGATTGGCGATGTTCAATGGCTAATCATGATGAGAATATATTTAAGAAACCTCGCAATAGTTATAATGAGTTT…	MGCITSKPLVSSPRWHNSATNSENLETGQRSHKASRYGAISGSPERSELTWHQQSLVGVARWPDKEYNRDHVPLQMEYGRSFWNESRKIGSALANGEIQNFEDLWEKARDWRCSMANHDENIFKKPRNSYNEFLFTTPLINQYNYIKERYSSRTDGSLQKLDDEGLLPPAKEFLITDKIFGEPISLTKIVCSSDSSAHRDQRRYSDLWSRGLDYGEPHYIQHTSSEEVPKILHHVNDLFNEVLQSNLSTKKALKFLGEIHWWLAHAMPDERGSAAKSELCVRAIAQAKGLDLPPMKSGIVPDLEAMTMSREQFIKQYPSMFDD	972	323
PlaYM7902_AvrB2a_1	PlaYM7902	AvrB	AvrB	AvrB	AvrB2	15	73	26	ATGGGATGCATTACTTCAAAACCACTGGTTAGCTCTCCCCGGTGGCATAATTCAGCTACTAATTCCGAAAATTTAGAAACTGGTCAAAGAAGCCATAAAGCCTCTCGTTATGGTGCTATTTCTGGATCACCGGAAAGGAGTGAATTGACTTGGCATCAGCAGTCGTTGGTTGGCGTAGCCCGATGGCCTGACAAAGAATATAATAGAGATCATGTCCCCCTGCAAATGGAATACGGTAGGTCTTTTTGGAATGAGTCGCGAAAAATAGGAAGTGCATTAGCTAATGGTGAAATTCAGAATTTTGAAGACTTATGGGAGAAAGCACGCGATTGGCGATGTTCAATGGCTAATCATGATGAGAATATATTTAAGAAACCTCGCAATAGTTATAATGAGTTT…	MGCITSKPLVSSPRWHNSATNSENLETGQRSHKASRYGAISGSPERSELTWHQQSLVGVARWPDKEYNRDHVPLQMEYGRSFWNESRKIGSALANGEIQNFEDLWEKARDWRCSMANHDENIFKKPRNSYNEFLFTTPLINQYNYIKERYSSRTDGSLQKLDDEGLLPPAKEFLITDKIFGEPISLTKIVCSSDSSAHRDQRRYSDLWSRGLDYGEPHYIQHTSSEEVPKILHHVNDLFNEVLQSNLSTKKALKFLGEIHWWLAHAMPDERGSAAKSELCVRAIAQAKGLDLPPMKSGIVPDLEAMTMSREQFIKQYPSMFDD	972	323
PlaYM8003_AvrB2a_1	PlaYM8003	AvrB	AvrB	AvrB	AvrB2	15	73	26	ATGGGATGCATTACTTCAAAACCACTGGTTAGCTCTCCCCGGTGGCATAATTCAGCTACTAATTCCGAAAATTTAGAAACTGGTCAAAGAAGCCATAAAGCCTCTCGTTATGGTGCTATTTCTGGATCACCGGAAAGGAGTGAATTGACTTGGCATCAGCAGTCGTTGGTTGGCGTAGCCCGATGGCCTGACAAAGAATATAATAGAGATCATGTCCCCCTGCAAATGGAATACGGTAGGTCTTTTTGGAATGAGTCGCGAAAAATAGGAAGTGCATTAGCTAATGGTGAAATTCAGAATTTTGAAGACTTATGGGAGAAAGCACGCGATTGGCGATGTTCAATGGCTAATCATGATGAGAATATATTTAAGAAACCTCGCAATAGTTATAATGAGTTT…	MGCITSKPLVSSPRWHNSATNSENLETGQRSHKASRYGAISGSPERSELTWHQQSLVGVARWPDKEYNRDHVPLQMEYGRSFWNESRKIGSALANGEIQNFEDLWEKARDWRCSMANHDENIFKKPRNSYNEFLFTTPLINQYNYIKERYSSRTDGSLQKLDDEGLLPPAKEFLITDKIFGEPISLTKIVCSSDSSAHRDQRRYSDLWSRGLDYGEPHYIQHTSSEEVPKILHHVNDLFNEVLQSNLSTKKALKFLGEIHWWLAHAMPDERGSAAKSELCVRAIAQAKGLDLPPMKSGIVPDLEAMTMSREQFIKQYPSMFDD	972	323
Pph1448A_AvrB2a_1	Pph1448A	AvrB	AvrB	AvrB	AvrB2	15	73	27	ATGGGATGCATTACTTCAAAACCACTGGTTAGCTCTCCCCGGTGGCATAATTCAGCTACTAATTCCGAAAATTTAGAAACTGGTCAAAGAAGCCATAAAGCCTCTCTTTATGGTGCTATTTCTGGATCACCGGAAAGGAGTGAATTGACTTGGCATCAGCAGTCGTTGGTTGGCGTAGCCCGATGGCCTGACAAAGAATATAATAGAGATCATGTCCCCCTGCAAATGGAATACGGTAGGTCTTTTTGGAATGAGTCGCGAAAAATAGGAAGTGCATTAGCTAATGGTGAAATTCAGAATTTTGAAGACTTATGGGAGAAAGCACGCGATTGGCGATGTTCAATGGCTAATCATGATGAGAATATATTTAAGAAACCTCGCAATAGTTATAATGAGTTT…	MGCITSKPLVSSPRWHNSATNSENLETGQRSHKASLYGAISGSPERSELTWHQQSLVGVARWPDKEYNRDHVPLQMEYGRSFWNESRKIGSALANGEIQNFEDLWEKARDWRCSMANHDENIFKKPRNSYNEFPFTTPLINQYNYIKERYSARTDGSLQKLDDEGLLPPAKEFLITDKIFGEPISLTKIVCSSDSSAHRDQRRYSDLWSRGLDYGEPHYIQHTSSEEVPKILHHVNDLFDEVLQSNLSTKKALKFLGEIHWWLAHAMPDERGSAAKSELCVRAIAQAKGLDLPPMKSGIVPDLEAMTMSREQFIKQYPSMFDD	972	323
PphICMP637_AvrB2a_1	PphICMP637	AvrB	AvrB	AvrB	AvrB2	15	73	27	ATGGGATGCATTACTTCAAAACCACTGGTTAGCTCTCCCCGGTGGCATAATTCAGCTACTAATTCCGAAAATTTAGAAACTGGTCAAAGAAGCCATAAAGCCTCTCTTTATGGTGCTATTTCTGGATCACCGGAAAGGAGTGAATTGACTTGGCATCAGCAGTCGTTGGTTGGCGTAGCCCGATGGCCTGACAAAGAATATAATAGAGATCATGTCCCCCTGCAAATGGAATACGGTAGGTCTTTTTGGAATGAGTCGCGAAAAATAGGAAGTGCATTAGCTAATGGTGAAATTCAGAATTTTGAAGACTTATGGGAGAAAGCACGCGATTGGCGATGTTCAATGGCTAATCATGATGAGAATATATTTAAGAAACCTCGCAATAGTTATAATGAGTTT…	MGCITSKPLVSSPRWHNSATNSENLETGQRSHKASLYGAISGSPERSELTWHQQSLVGVARWPDKEYNRDHVPLQMEYGRSFWNESRKIGSALANGEIQNFEDLWEKARDWRCSMANHDENIFKKPRNSYNEFPFTTPLINQYNYIKERYSARTDGSLQKLDDEGLLPPAKEFLITDKIFGEPISLTKIVCSSDSSAHRDQRRYSDLWSRGLDYGEPHYIQHTSSEEVPKILHHVNDLFDEVLQSNLSTKKALKFLGEIHWWLAHAMPDERGSAAKSELCVRAIAQAKGLDLPPMKSGIVPDLEAMTMSREQFIKQYPSMFDD	972	323
PphKN86_AvrB2a_1	PphKN86	AvrB	AvrB	AvrB	AvrB2	15	73	27	ATGGGATGCATTACTTCAAAACCACTGGTTAGCTCTCCCCGGTGGCATAATTCAGCTACTAATTCCGAAAATTTAGAAACTGGTCAAAGAAGCCATAAAGCCTCTCTTTATGGTGCTATTTCTGGATCACCGGAAAGGAGTGAATTGACTTGGCATCAGCAGTCGTTGGTTGGCGTAGCCCGATGGCCTGACAAAGAATATAATAGAGATCATGTCCCCCTGCAAATGGAATACGGTAGGTCTTTTTGGAATGAGTCGCGAAAAATAGGAAGTGCATTAGCTAATGGTGAAATTCAGAATTTTGAAGACTTATGGGAGAAAGCACGCGATTGGCGATGTTCAATGGCTAATCATGATGAGAATATATTTAAGAAACCTCGCAATAGTTATAATGAGTTT…	MGCITSKPLVSSPRWHNSATNSENLETGQRSHKASLYGAISGSPERSELTWHQQSLVGVARWPDKEYNRDHVPLQMEYGRSFWNESRKIGSALANGEIQNFEDLWEKARDWRCSMANHDENIFKKPRNSYNEFPFTTPLINQYNYIKERYSARTDGSLQKLDDEGLLPPAKEFLITDKIFGEPISLTKIVCSSDSSAHRDQRRYSDLWSRGLDYGEPHYIQHTSSEEVPKILHHVNDLFDEVLQSNLSTKKALKFLGEIHWWLAHAMPDERGSAAKSELCVRAIAQAKGLDLPPMKSGIVPDLEAMTMSREQFIKQYPSMFDD	972	323
Psy0507_AvrB2a_1	Psy0507	AvrB	AvrB	AvrB	AvrB2	15	73	27	ATGGGATGCATTACTTCAAAACCACTGGTTAGCTCTCCCCGGTGGCATAATTCAGCTACTAATTCCGAAAATTTAGAAACTGGTCAAAGAAGCCATAAAGCCTCTCTTTATGGTGCTATTTCTGGATCACCGGAAAGGAGTGAATTGACTTGGCATCAGCAGTCGTTGGTTGGCGTAGCCCGATGGCCTGACAAAGAATATAATAGAGATCATGTCCCCCTGCAAATGGAATACGGTAGGTCTTTTTGGAATGAGTCGCGAAAAATAGGAAGTGCATTAGCTAATGGTGAAATTCAGAATTTTGAAGACTTATGGGAGAAAGCACGCGATTGGCGATGTTCAATGGCTAATCATGATGAGAATATATTTAAGAAACCTCGCAATAGTTATAATGAGTTT…	MGCITSKPLVSSPRWHNSATNSENLETGQRSHKASLYGAISGSPERSELTWHQQSLVGVARWPDKEYNRDHVPLQMEYGRSFWNESRKIGSALANGEIQNFEDLWEKARDWRCSMANHDENIFKKPRNSYNEFPFTTPLINQYNYIKERYSARTDGSLQKLDDEGLLPPAKEFLITDKIFGEPISLTKIVCSSDSSAHRDQRRYSDLWSRGLDYGEPHYIQHTSSEEVPKILHHVNDLFDEVLQSNLSTKKALKFLGEIHWWLAHAMPDERGSAAKSELCVRAIAQAKGLDLPPMKSGIVPDLEAMTMSREQFIKQYPSMFDD	972	323
Psy0509_AvrB2a_1	Psy0509	AvrB	AvrB	AvrB	AvrB2	15	73	27	ATGGGATGCATTACTTCAAAACCACTGGTTAGCTCTCCCCGGTGGCATAATTCAGCTACTAATTCCGAAAATTTAGAAACTGGTCAAAGAAGCCATAAAGCCTCTCTTTATGGTGCTATTTCTGGATCACCGGAAAGGAGTGAATTGACTTGGCATCAGCAGTCGTTGGTTGGCGTAGCCCGATGGCCTGACAAAGAATATAATAGAGATCATGTCCCCCTGCAAATGGAATACGGTAGGTCTTTTTGGAATGAGTCGCGAAAAATAGGAAGTGCATTAGCTAATGGTGAAATTCAGAATTTTGAAGACTTATGGGAGAAAGCACGCGATTGGCGATGTTCAATGGCTAATCATGATGAGAATATATTTAAGAAACCTCGCAATAGTTATAATGAGTTT…	MGCITSKPLVSSPRWHNSATNSENLETGQRSHKASLYGAISGSPERSELTWHQQSLVGVARWPDKEYNRDHVPLQMEYGRSFWNESRKIGSALANGEIQNFEDLWEKARDWRCSMANHDENIFKKPRNSYNEFPFTTPLINQYNYIKERYSARTDGSLQKLDDEGLLPPAKEFLITDKIFGEPISLTKIVCSSDSSAHRDQRRYSDLWSRGLDYGEPHYIQHTSSEEVPKILHHVNDLFDEVLQSNLSTKKALKFLGEIHWWLAHAMPDERGSAAKSELCVRAIAQAKGLDLPPMKSGIVPDLEAMTMSREQFIKQYPSMFDD	972	323
Psy0515_AvrB2a_1	Psy0515	AvrB	AvrB	AvrB	AvrB2	15	73	27	ATGGGATGCATTACTTCAAAACCACTGGTTAGCTCTCCCCGGTGGCATAATTCAGCTACTAATTCCGAAAATTTAGAAACTGGTCAAAGAAGCCATAAAGCCTCTCTTTATGGTGCTATTTCTGGATCACCGGAAAGGAGTGAATTGACTTGGCATCAGCAGTCGTTGGTTGGCGTAGCCCGATGGCCTGACAAAGAATATAATAGAGATCATGTCCCCCTGCAAATGGAATACGGTAGGTCTTTTTGGAATGAGTCGCGAAAAATAGGAAGTGCATTAGCTAATGGTGAAATTCAGAATTTTGAAGACTTATGGGAGAAAGCACGCGATTGGCGATGTTCAATGGCTAATCATGATGAGAATATATTTAAGAAACCTCGCAATAGTTATAATGAGTTT…	MGCITSKPLVSSPRWHNSATNSENLETGQRSHKASLYGAISGSPERSELTWHQQSLVGVARWPDKEYNRDHVPLQMEYGRSFWNESRKIGSALANGEIQNFEDLWEKARDWRCSMANHDENIFKKPRNSYNEFPFTTPLINQYNYIKERYSARTDGSLQKLDDEGLLPPAKEFLITDKIFGEPISLTKIVCSSDSSAHRDQRRYSDLWSRGLDYGEPHYIQHTSSEEVPKILHHVNDLFDEVLQSNLSTKKALKFLGEIHWWLAHAMPDERGSAAKSELCVRAIAQAKGLDLPPMKSGIVPDLEAMTMSREQFIKQYPSMFDD	972	323
Psy0525_AvrB2a_1	Psy0525	AvrB	AvrB	AvrB	AvrB2	15	73	27	ATGGGATGCATTACTTCAAAACCACTGGTTAGCTCTCCCCGGTGGCATAATTCAGCTACTAATTCCGAAAATTTAGAAACTGGTCAAAGAAGCCATAAAGCCTCTCTTTATGGTGCTATTTCTGGATCACCGGAAAGGAGTGAATTGACTTGGCATCAGCAGTCGTTGGTTGGCGTAGCCCGATGGCCTGACAAAGAATATAATAGAGATCATGTCCCCCTGCAAATGGAATACGGTAGGTCTTTTTGGAATGAGTCGCGAAAAATAGGAAGTGCATTAGCTAATGGTGAAATTCAGAATTTTGAAGACTTATGGGAGAAAGCACGCGATTGGCGATGTTCAATGGCTAATCATGATGAGAATATATTTAAGAAACCTCGCAATAGTTATAATGAGTTT…	MGCITSKPLVSSPRWHNSATNSENLETGQRSHKASLYGAISGSPERSELTWHQQSLVGVARWPDKEYNRDHVPLQMEYGRSFWNESRKIGSALANGEIQNFEDLWEKARDWRCSMANHDENIFKKPRNSYNEFPFTTPLINQYNYIKERYSARTDGSLQKLDDEGLLPPAKEFLITDKIFGEPISLTKIVCSSDSSAHRDQRRYSDLWSRGLDYGEPHYIQHTSSEEVPKILHHVNDLFDEVLQSNLSTKKALKFLGEIHWWLAHAMPDERGSAAKSELCVRAIAQAKGLDLPPMKSGIVPDLEAMTMSREQFIKQYPSMFDD	972	323
PphHB10Y_AvrB2a_1	PphHB10Y	AvrB	AvrB	AvrB	AvrB2	15	73	28	ATGGGATGCATTACTTCAAAACCACTGGTTAGCTCTCCCCAGTGGCATAATTCAGCTACTAATTCCGAAAATTTAGAAACTGGTCAAAGAAGCCATAAAGCCTCTCTTTATGGTGCTATTTCTGGATCACCGGAAAGGAGTGAATTGACTTGGCATCAGCAGTCGTTGGTTGGCGTAGCCCGATGGCCTGACAAAGAATATAATAGAGATCATGTCCCCCTGCAAATGGAATACGGTAGGTCTTTTTGGAATGAGTCGCGAAAAATAGGAAGTGCATTAGCTAATGGTGAAATTCAGAATTTTGAAGACTTATGGGAGAAAGCACGCGATTGGCGATGTTCAATGGCTAATCATGATGAGAATATATTTAAGAAACCTCGCAATAGTTATAATGAGTTT…	MGCITSKPLVSSPQWHNSATNSENLETGQRSHKASLYGAISGSPERSELTWHQQSLVGVARWPDKEYNRDHVPLQMEYGRSFWNESRKIGSALANGEIQNFEDLWEKARDWRCSMANHDENIFKKPRNSYNEFPFTTPLINQYNYIKERYSARTDGSLQKLDDEGLLPPAKEFLITDKIFGEPISLTKIVCSSDSSAHRDQRRYSDLWSRGLDYGEPHYIQHTSSEEVPKILHHVNDLFDEVLQSNLSTKKALKFLGEIHWWLAHAMPDERGSAAKSELCVRAIAQAKGLDLPPMKSGIVPDLEAMTMSREQFIKQYPSMFDD	972	323
PphICMP2740_AvrB2a_1	PphICMP2740	AvrB	AvrB	AvrB	AvrB2	15	73	29	TTGACTTGGCATCAGCAGTCGTTGGTTGGCGTAGCCCGATGGCCTGACAAAGAATATAATAGAGATCATGTCCCCCTGCAAATGGAATACGGTAGGTCTTTTTGGAATGAGTCGCGAAAAATAGGAAGTGCATTAGCTAATGGTGAAATTCAGAATTTTGAAGACTTATGGGAGAAAGCACGCGATTGGCGATGTTCAATGGCTAATCATGATGAGAATATATTTAAGAAACCTCGCAATAGTTATAATGAGTTTCCTTTTACAACCCCATTAATAAATCAATACAATTATATTAAAGAAAGATATAGTGCCCGTACTGATGGGAGCTTGCAAAAACTCGATGATGAAGGCTTATTGCCACCAGCAAAAGAATTTTTGATAACGGATAAGATTTTTGGA…	MTWHQQSLVGVARWPDKEYNRDHVPLQMEYGRSFWNESRKIGSALANGEIQNFEDLWEKARDWRCSMANHDENIFKKPRNSYNEFPFTTPLINQYNYIKERYSARTDGSLQKLDDEGLLPPAKEFLITDKIFGEPISLTKIVCSSDSSAHRDQRRYSDLWSRGLDYGEPHYIQHTSSEEVPKILHHVNDLFDEVLQSNLSTKKALKFLGEIHWWLAHAMPDERGSAAKSELCVRAIAQAKGLDLPPMKSGIVPDLEAMTMSREQFIKQYPSMFDD	828	275
Psy0516_AvrB2a_1	Psy0516	AvrB	AvrB	AvrB	AvrB2	15	73	29	TTGACTTGGCATCAGCAGTCGTTGGTTGGCGTAGCCCGATGGCCTGACAAAGAATATAATAGAGATCATGTCCCCCTGCAAATGGAATACGGTAGGTCTTTTTGGAATGAGTCGCGAAAAATAGGAAGTGCATTAGCTAATGGTGAAATTCAGAATTTTGAAGACTTATGGGAGAAAGCACGCGATTGGCGATGTTCAATGGCTAATCATGATGAGAATATATTTAAGAAACCTCGCAATAGTTATAATGAGTTTCCTTTTACAACCCCATTAATAAATCAATACAATTATATTAAAGAAAGATATAGTGCCCGTACTGATGGGAGCTTGCAAAAACTCGATGATGAAGGCTTATTGCCACCAGCAAAAGAATTTTTGATAACGGATAAGATTTTTGGA…	MTWHQQSLVGVARWPDKEYNRDHVPLQMEYGRSFWNESRKIGSALANGEIQNFEDLWEKARDWRCSMANHDENIFKKPRNSYNEFPFTTPLINQYNYIKERYSARTDGSLQKLDDEGLLPPAKEFLITDKIFGEPISLTKIVCSSDSSAHRDQRRYSDLWSRGLDYGEPHYIQHTSSEEVPKILHHVNDLFDEVLQSNLSTKKALKFLGEIHWWLAHAMPDERGSAAKSELCVRAIAQAKGLDLPPMKSGIVPDLEAMTMSREQFIKQYPSMFDD	828	275
Psy0527_AvrB2a_1	Psy0527	AvrB	AvrB	AvrB	AvrB2	15	73	29	TTGACTTGGCATCAGCAGTCGTTGGTTGGCGTAGCCCGATGGCCTGACAAAGAATATAATAGAGATCATGTCCCCCTGCAAATGGAATACGGTAGGTCTTTTTGGAATGAGTCGCGAAAAATAGGAAGTGCATTAGCTAATGGTGAAATTCAGAATTTTGAAGACTTATGGGAGAAAGCACGCGATTGGCGATGTTCAATGGCTAATCATGATGAGAATATATTTAAGAAACCTCGCAATAGTTATAATGAGTTTCCTTTTACAACCCCATTAATAAATCAATACAATTATATTAAAGAAAGATATAGTGCCCGTACTGATGGGAGCTTGCAAAAACTCGATGATGAAGGCTTATTGCCACCAGCAAAAGAATTTTTGATAACGGATAAGATTTTTGGA…	MTWHQQSLVGVARWPDKEYNRDHVPLQMEYGRSFWNESRKIGSALANGEIQNFEDLWEKARDWRCSMANHDENIFKKPRNSYNEFPFTTPLINQYNYIKERYSARTDGSLQKLDDEGLLPPAKEFLITDKIFGEPISLTKIVCSSDSSAHRDQRRYSDLWSRGLDYGEPHYIQHTSSEEVPKILHHVNDLFDEVLQSNLSTKKALKFLGEIHWWLAHAMPDERGSAAKSELCVRAIAQAKGLDLPPMKSGIVPDLEAMTMSREQFIKQYPSMFDD	828	275
Psy0532_AvrB2a_1	Psy0532	AvrB	AvrB	AvrB	AvrB2	15	73	29	TTGACTTGGCATCAGCAGTCGTTGGTTGGCGTAGCCCGATGGCCTGACAAAGAATATAATAGAGATCATGTCCCCCTGCAAATGGAATACGGTAGGTCTTTTTGGAATGAGTCGCGAAAAATAGGAAGTGCATTAGCTAATGGTGAAATTCAGAATTTTGAAGACTTATGGGAGAAAGCACGCGATTGGCGATGTTCAATGGCTAATCATGATGAGAATATATTTAAGAAACCTCGCAATAGTTATAATGAGTTTCCTTTTACAACCCCATTAATAAATCAATACAATTATATTAAAGAAAGATATAGTGCCCGTACTGATGGGAGCTTGCAAAAACTCGATGATGAAGGCTTATTGCCACCAGCAAAAGAATTTTTGATAACGGATAAGATTTTTGGA…	MTWHQQSLVGVARWPDKEYNRDHVPLQMEYGRSFWNESRKIGSALANGEIQNFEDLWEKARDWRCSMANHDENIFKKPRNSYNEFPFTTPLINQYNYIKERYSARTDGSLQKLDDEGLLPPAKEFLITDKIFGEPISLTKIVCSSDSSAHRDQRRYSDLWSRGLDYGEPHYIQHTSSEEVPKILHHVNDLFDEVLQSNLSTKKALKFLGEIHWWLAHAMPDERGSAAKSELCVRAIAQAKGLDLPPMKSGIVPDLEAMTMSREQFIKQYPSMFDD	828	275
PphICMP5059_AvrB2a_1	PphICMP5059	AvrB	AvrB	AvrB	AvrB2	15	73	30	ATGGCTAATCATGATGAGAATATATTTAAGAAACCTCGCAATAGTTATAATGAGTTTCCTTTTACAACCCCATTAATAAATCAATACAATTATATTAAAGAAAGATATAGTGCCCGTACTGATGGGAGCTTGCAAAAACTCGATGATGAAGGCTTATTGCCACCAGCAAAAGAATTTTTGATAACGGATAAGATTTTTGGAGAGCCAATAAGCCTGACAAAAATAGTTTGCAGTTCAGATAGTTCTGCGCACCGAGACCAAAGACGATATTCGGATTTATGGTCGCGAGGCTTAGACTATGGAGAGCCACACTACATCCAACATACTTCATCGGAAGAAGTCCCTAAAATTCTTCATCATGTAAACGATTTGTTTAATGAGGTCCTACAATCAAACTTA…	MANHDENIFKKPRNSYNEFPFTTPLINQYNYIKERYSARTDGSLQKLDDEGLLPPAKEFLITDKIFGEPISLTKIVCSSDSSAHRDQRRYSDLWSRGLDYGEPHYIQHTSSEEVPKILHHVNDLFNEVLQSNLSTKKALKFLGEIHWWLAHAMPDERGSAAKSELCVRAIAQAKGLDLPPMKSGIVPDLEAMTMSREQFIKQYPSMFDD	630	209
PphK4_AvrB2a_1	PphK4	AvrB	AvrB	AvrB	AvrB2	15	73	31	ATGGGATGCATTACTTCAAAACCACTGGTTAGCTCTCCCCGGTGGCATAATTCAGCTACTAATTCCGAAAATTTAGAAACTGGTCAAAGAAGCCATAAAGCCTCTCTTTATGGTGCTATGTCTGGATCACCGGAAAGGAGTGAATTGACTTGGCATCAGCAGTCGTTGGTTGGCGTAGCCCGATGGCCTGACAAAGAATATAATAGAGATCATGTCCCCCTGCAAATGGAATACGGTAGGTCTTTTTGGAATGAGTCGCGAAAAATAGGAAGTGCATTAGCTAATGGTGAAATTCAGAATTTTGAAGACTTATGGGAGAAAGCACGCGATTGGCGATGTTCAATGGCTAATCATGATGAGAATATATTTAAGAAACCTCGCAATAGTTATAATGAGTTT…	MGCITSKPLVSSPRWHNSATNSENLETGQRSHKASLYGAMSGSPERSELTWHQQSLVGVARWPDKEYNRDHVPLQMEYGRSFWNESRKIGSALANGEIQNFEDLWEKARDWRCSMANHDENIFKKPRNSYNEFPFTTPLINQYNYIKERYSARTDGSLQKLDDEGLLPPAKEFLITDKIFGEPISLTKIVCGSDSSAHRDQR	609	202
PphNPS3121_AvrB2a_1	PphNPS3121	AvrB	AvrB	AvrB	AvrB2	15	73	32	ATGGGATGCATTACTTCAAAACCACTGGTTAGCTCTCCCCGGTGGCATAATTCAGCTACTAATTCCGAAAATTTAGAAACTGGTCAAAGAAGCCATAAAGCCTCTCTTTATGGTGCTATGTCTGGATCACCGGAAAGGAGTGAATTGACTTGGCATCAGCAGTCGTTGGTTGGCGTAGCCCGATGGCCTGACAAAGAATATAATAGAGATCATGTCCCCCTGCAAATGGAATACGGTAGGTCTTTTTGGAATGAGTCGCGAAAAATAGGAAGTGCATTAGCTAATGGTGAAATTCAGAATTTTGAAGACTTATGGGAGAAAGCACGCGATTGGCGATGTTCAATGGCTAATCATGATGAGAATATATTTAAGAAACCTCGCAATAGTTATAATGAGTTT…	MGCITSKPLVSSPRWHNSATNSENLETGQRSHKASLYGAMSGSPERSELTWHQQSLVGVARWPDKEYNRDHVPLQMEYGRSFWNESRKIGSALANGEIQNFEDLWEKARDWRCSMANHDENIFKKPRNSYNEFPFTTPLINQYNYIKERYSARTDGSLQKLDDEGLLPPAKEFLITDKIFGEPISLTKIVCSSDSSAHRDQRRYSDLWSRGLDYGEPHYIQHTSSEEVPKILHHVNDLFDEVLQSNLSTKKALKFLGEIHWWLAHAMPDERGSAAKSELCVRAIAQAKGLDLPPMKSGIVPDLEAMTMSREQFIKQYPSMFDD	972	323
PsyICMP4909_AvrB2a_1	PsyICMP4909	AvrB	AvrB	AvrB	AvrB2	15	73	32	ATGGGATGCATTACTTCAAAACCACTGGTTAGCTCTCCCCGGTGGCATAATTCAGCTACTAATTCCGAAAATTTAGAAACTGGTCAAAGAAGCCATAAAGCCTCTCTTTATGGTGCTATGTCTGGATCACCGGAAAGGAGTGAATTGACTTGGCATCAGCAGTCGTTGGTTGGCGTAGCCCGATGGCCTGACAAAGAATATAATAGAGATCATGTCCCCCTGCAAATGGAATACGGTAGGTCTTTTTGGAATGAGTCGCGAAAAATAGGAAGTGCATTAGCTAATGGTGAAATTCAGAATTTTGAAGACTTATGGGAGAAAGCACGCGATTGGCGATGTTCAATGGCTAATCATGATGAGAATATATTTAAGAAACCTCGCAATAGTTATAATGAGTTT…	MGCITSKPLVSSPRWHNSATNSENLETGQRSHKASLYGAMSGSPERSELTWHQQSLVGVARWPDKEYNRDHVPLQMEYGRSFWNESRKIGSALANGEIQNFEDLWEKARDWRCSMANHDENIFKKPRNSYNEFPFTTPLINQYNYIKERYSARTDGSLQKLDDEGLLPPAKEFLITDKIFGEPISLTKIVCSSDSSAHRDQRRYSDLWSRGLDYGEPHYIQHTSSEEVPKILHHVNDLFDEVLQSNLSTKKALKFLGEIHWWLAHAMPDERGSAAKSELCVRAIAQAKGLDLPPMKSGIVPDLEAMTMSREQFIKQYPSMFDD	972	323
PphY5_2_AvrB2a_1	PphY5_2	AvrB	AvrB	AvrB	AvrB2	15	73	33	ATGGGATGCATTACTTCAAAACCACTGGTTAGCTCTCCCCAGTGGCATAATTCAGCTACTAATTCCGAAAATTTAGAAACTGGTCAAAGAAGCCATAAAGCCTCTCTTTATGGTGCTATTTCTGGATCACCGGAAAGGAGTGAATTGACTTGGCATCAGCAGTCGTTGGTTGGCGTAGCCCGATGGCCTGACAAAGAATATAATAGAGATCATGTCCCCCTGCAAATGGAATACGGTAGGTCTTTTTGGAATGAGTCGCGAAAAATAGGAAGTGCATTAGCTAATGGTGAAATTCAGAATTTTGAAGACTTATGGGAGAAAGCACGCGATTGGCGATGTTCAATGGCTAATCATGATGAGAATATATTTAAGAAACCTCGCAATAGTTATAATGAGTTT…	MGCITSKPLVSSPQWHNSATNSENLETGQRSHKASLYGAISGSPERSELTWHQQSLVGVARWPDKEYNRDHVPLQMEYGRSFWNESRKIGSALANGEIQNFEDLWEKARDWRCSMANHDENIFKKPRNSYNEFPFTTPLINQYNYIKERYSARTDGSLQKLDDEGLLPPAKEFLITDKIFGEPISLTKIVCGSDSSAHRDQRRYSDLWSRGLDYGEPHYIQHTSSEEVPKILHHVNDLFDEVLQSNLSTKKALKFLGEIHWWLAHAMPDERGSAAKSELCVRAIAQAKGLDLPPMKSGIVPDLEAMTMSREQFIKQYPSMFDD	972	323
Psy0506_AvrB2a_1	Psy0506	AvrB	AvrB	AvrB	AvrB2	15	73	34	ATGGGATGCATTACTTCAAAACCACTGGTTAGCTCTCCCCGGTGGCATAATTCAGCTACTAATTCCGAAAATTTAGAAACTGGTCAAAGAAGCCATAAAGCCTCTCTTTATGGTGCTATGTCTGGATCACCGGAAAGGAGTGAATTGACTTGGCATCAGCAGTCGTTGGTTGGCGTAGCCCGATGGCCTGACAAAGAATATAATAGAGATCATGTCCCCCTGCAAATGGAATACGGTAGGTCTTTTTGGAATGAGTCGCGAAAAATAGGAAGTGCATTAGCTAATGGTGAAATTCAGAATTTTGAAGACTTATGGGAGAAAGCACGCGATTGGCGATGTTCAATGGCTAATCATGATGAGAATATATTTAAGAAACCTCGCAATAGTTATAATGAGTTT…	MGCITSKPLVSSPRWHNSATNSENLETGQRSHKASLYGAMSGSPERSELTWHQQSLVGVARWPDKEYNRDHVPLQMEYGRSFWNESRKIGSALANGEIQNFEDLWEKARDWRCSMANHDENIFKKPRNSYNEFPFTTPLINQYNYIKERYSARTDGSLQKLDDEGLLPPAKEFLITDKIFGEPISLTKIVCSSDSSAHRDQRRYSDLWSRGLDYGEPHYIQHTSSEEVPKILHHVNDLFNEVLQSNLSTKKALKFLGEIHWWLAHAMPDERGSAAKSELCVRAIAQAKGLDLPPMKSGIVPDLEAMTMSREQFIKQYPSMFDD	972	323
Psy0520_AvrB2a_1	Psy0520	AvrB	AvrB	AvrB	AvrB2	15	73	34	ATGGGATGCATTACTTCAAAACCACTGGTTAGCTCTCCCCGGTGGCATAATTCAGCTACTAATTCCGAAAATTTAGAAACTGGTCAAAGAAGCCATAAAGCCTCTCTTTATGGTGCTATGTCTGGATCACCGGAAAGGAGTGAATTGACTTGGCATCAGCAGTCGTTGGTTGGCGTAGCCCGATGGCCTGACAAAGAATATAATAGAGATCATGTCCCCCTGCAAATGGAATACGGTAGGTCTTTTTGGAATGAGTCGCGAAAAATAGGAAGTGCATTAGCTAATGGTGAAATTCAGAATTTTGAAGACTTATGGGAGAAAGCACGCGATTGGCGATGTTCAATGGCTAATCATGATGAGAATATATTTAAGAAACCTCGCAATAGTTATAATGAGTTT…	MGCITSKPLVSSPRWHNSATNSENLETGQRSHKASLYGAMSGSPERSELTWHQQSLVGVARWPDKEYNRDHVPLQMEYGRSFWNESRKIGSALANGEIQNFEDLWEKARDWRCSMANHDENIFKKPRNSYNEFPFTTPLINQYNYIKERYSARTDGSLQKLDDEGLLPPAKEFLITDKIFGEPISLTKIVCSSDSSAHRDQRRYSDLWSRGLDYGEPHYIQHTSSEEVPKILHHVNDLFNEVLQSNLSTKKALKFLGEIHWWLAHAMPDERGSAAKSELCVRAIAQAKGLDLPPMKSGIVPDLEAMTMSREQFIKQYPSMFDD	972	323
Psy0508_AvrB2a_1	Psy0508	AvrB	AvrB	AvrB	AvrB2	15	73	35	TTGACTTGGCATCAGCAGTCGTTGGTTGGCGTAGCCCGATGGCCTGACAAAGAATATAATAGAGATCATGTCCCCCTGCAAATGGAATACGGTAGGTCTTTTTGGAATGAGTCGCGAAAAATAGGAAGTGCATTAGCTAATGGTGAAATTCAGAATTTTGAAGACTTATGGGAGAAAGCACGCGATTGGCGATGTTCAATGGCTAATCATGATGAGAATATATTTAAGAAACCTCGCAATAGTTATAATGAGTTTCCTTTTACAACCCCATTAATAAATCAATACAATTATATTAAAGAAAGATATAGTGCCCGTACTGATGGGAGCTTGCAAAAACTCGATGATGAAGGCTTATTGCCACCAGCAAAAGAATTTTTGATAACGGATAAGATTTTTGGA…	MTWHQQSLVGVARWPDKEYNRDHVPLQMEYGRSFWNESRKIGSALANGEIQNFEDLWEKARDWRCSMANHDENIFKKPRNSYNEFPFTTPLINQYNYIKERYSARTDGSLQKLDDEGLLPPAKEFLITDKIFGEPISLTKIVCSSDSSAHRDQRRYSDLWSRGLDYGEPHYIQHTSSEEVPKILHHVNDLFNEVLQSNLSTKKALKFLGEIHWWLAHAMPDERGSAAKSELCVRAIAQAKGLDLPPMKSGIVPDLEAMTMSREQFIKQYPSMFDD	828	275
Psy0523_AvrB2a_1	Psy0523	AvrB	AvrB	AvrB	AvrB2	15	73	35	TTGACTTGGCATCAGCAGTCGTTGGTTGGCGTAGCCCGATGGCCTGACAAAGAATATAATAGAGATCATGTCCCCCTGCAAATGGAATACGGTAGGTCTTTTTGGAATGAGTCGCGAAAAATAGGAAGTGCATTAGCTAATGGTGAAATTCAGAATTTTGAAGACTTATGGGAGAAAGCACGCGATTGGCGATGTTCAATGGCTAATCATGATGAGAATATATTTAAGAAACCTCGCAATAGTTATAATGAGTTTCCTTTTACAACCCCATTAATAAATCAATACAATTATATTAAAGAAAGATATAGTGCCCGTACTGATGGGAGCTTGCAAAAACTCGATGATGAAGGCTTATTGCCACCAGCAAAAGAATTTTTGATAACGGATAAGATTTTTGGA…	MTWHQQSLVGVARWPDKEYNRDHVPLQMEYGRSFWNESRKIGSALANGEIQNFEDLWEKARDWRCSMANHDENIFKKPRNSYNEFPFTTPLINQYNYIKERYSARTDGSLQKLDDEGLLPPAKEFLITDKIFGEPISLTKIVCSSDSSAHRDQRRYSDLWSRGLDYGEPHYIQHTSSEEVPKILHHVNDLFNEVLQSNLSTKKALKFLGEIHWWLAHAMPDERGSAAKSELCVRAIAQAKGLDLPPMKSGIVPDLEAMTMSREQFIKQYPSMFDD	828	275
Psy0526_AvrB2a_1	Psy0526	AvrB	AvrB	AvrB	AvrB2	15	73	35	TTGACTTGGCATCAGCAGTCGTTGGTTGGCGTAGCCCGATGGCCTGACAAAGAATATAATAGAGATCATGTCCCCCTGCAAATGGAATACGGTAGGTCTTTTTGGAATGAGTCGCGAAAAATAGGAAGTGCATTAGCTAATGGTGAAATTCAGAATTTTGAAGACTTATGGGAGAAAGCACGCGATTGGCGATGTTCAATGGCTAATCATGATGAGAATATATTTAAGAAACCTCGCAATAGTTATAATGAGTTTCCTTTTACAACCCCATTAATAAATCAATACAATTATATTAAAGAAAGATATAGTGCCCGTACTGATGGGAGCTTGCAAAAACTCGATGATGAAGGCTTATTGCCACCAGCAAAAGAATTTTTGATAACGGATAAGATTTTTGGA…	MTWHQQSLVGVARWPDKEYNRDHVPLQMEYGRSFWNESRKIGSALANGEIQNFEDLWEKARDWRCSMANHDENIFKKPRNSYNEFPFTTPLINQYNYIKERYSARTDGSLQKLDDEGLLPPAKEFLITDKIFGEPISLTKIVCSSDSSAHRDQRRYSDLWSRGLDYGEPHYIQHTSSEEVPKILHHVNDLFNEVLQSNLSTKKALKFLGEIHWWLAHAMPDERGSAAKSELCVRAIAQAKGLDLPPMKSGIVPDLEAMTMSREQFIKQYPSMFDD	828	275
Psy0514_AvrB2a_1	Psy0514	AvrB	AvrB	AvrB	AvrB2	15	73	36	TTGACTTGGCATCAGCAGTCGTTGGTTGGCGTAGCCCGATGGCCTGACAAAGAATATAATAGAGATCATGTCCCCCTGCAAATGGAATACGGTAGGTCTTTTTGGAATGAGTCGCGAAAAATAGGAAGTGCATTAGCTAATGGTGAAATTCAGAATTTTGAAGACTTATGGGAGAAAGCACGCGATTGGCGATGTTCAATGGCTAATCATGATGAGAATATATTTAAGAAACCTCGCAATAGTTATAATGAGTTTCCTTTTACAACCCCATTAATAAATCAATACAATTATATTAAAGAAAGATATAGTGCCCGTACTGATGGGAGCTTGCAAAAACTCGATGATGAAGGCTTATTGCCACCAGCAAAAGAATTTTTGATAACGGATAAGATTTTTGGA…	MTWHQQSLVGVARWPDKEYNRDHVPLQMEYGRSFWNESRKIGSALANGEIQNFEDLWEKARDWRCSMANHDENIFKKPRNSYNEFPFTTPLINQYNYIKERYSARTDGSLQKLDDEGLLPPAKEFLITDKIFGEPISLTKIVCSSDSSAHRDQRRYSDLWSRGLDYGEPHYIQHTSSEEVPKILHHVNDLFDEVLQSNLSTKKALKFLGEIHWWLAHAMPDERGSAAKSELCVRAIAQAKGLDLPPMKSGIVPDLEAMTMSREQFIKQYPSMFDD	828	275
Psy0518_AvrB2a_1	Psy0518	AvrB	AvrB	AvrB	AvrB2	15	73	37	ATGGGATGCATTACTTCAAAACCACTGGTTAGCTCTCCCCAGTGGCATAATTCAGCTACTAATTCCGAAAATTTAGAAACTGGTCAAAGAAGCCATAAAGCCTCTCTTTATGGTGCTATGTCTGGATCACCGGAAAGGAGTGAATTGACTTGGCATCAGCAGTCGTTGGTTGGCGTAGCCCGATGGCCTGACAAAGAATATAATAGAGATCATGTCCCCCTGCAAATGGAATACGGTAGGTCTTTTTGGAATGAGTCGCGAAAAATAGGAAGTGCATTAGCTAATGGTGAAATTCAGAATTTTGAAGACTTATGGGAGAAAGCACGCGATTGGCGATGTTCAATGGCTAATCATGATGAGAATATATTTAAGAAACCTCGCAATAGTTATAATGAGTTT…	MGCITSKPLVSSPQWHNSATNSENLETGQRSHKASLYGAMSGSPERSELTWHQQSLVGVARWPDKEYNRDHVPLQMEYGRSFWNESRKIGSALANGEIQNFEDLWEKARDWRCSMANHDENIFKKPRNSYNEFPFTTPLINQYNYIKERYSARTDGSLQKLDDEGLLPPAKEFLITDKIFGEPISLTKIVCSSDSSAHRDQRRYSDLWSRGLDYGEPHYIQHTSSEEVPKILHHVNDLFDEVLQSNLSTKKALKFLGEIHWWLAHAMPDERGSAAKSELCVRAIAQAKGLDLPPMKSGIVPDLEAMTMSREQFIKQYPSMFDD	972	323
Psy0522_AvrB2a_1	Psy0522	AvrB	AvrB	AvrB	AvrB2	15	73	37	ATGGGATGCATTACTTCAAAACCACTGGTTAGCTCTCCCCAGTGGCATAATTCAGCTACTAATTCCGAAAATTTAGAAACTGGTCAAAGAAGCCATAAAGCCTCTCTTTATGGTGCTATGTCTGGATCACCGGAAAGGAGTGAATTGACTTGGCATCAGCAGTCGTTGGTTGGCGTAGCCCGATGGCCTGACAAAGAATATAATAGAGATCATGTCCCCCTGCAAATGGAATACGGTAGGTCTTTTTGGAATGAGTCGCGAAAAATAGGAAGTGCATTAGCTAATGGTGAAATTCAGAATTTTGAAGACTTATGGGAGAAAGCACGCGATTGGCGATGTTCAATGGCTAATCATGATGAGAATATATTTAAGAAACCTCGCAATAGTTATAATGAGTTT…	MGCITSKPLVSSPQWHNSATNSENLETGQRSHKASLYGAMSGSPERSELTWHQQSLVGVARWPDKEYNRDHVPLQMEYGRSFWNESRKIGSALANGEIQNFEDLWEKARDWRCSMANHDENIFKKPRNSYNEFPFTTPLINQYNYIKERYSARTDGSLQKLDDEGLLPPAKEFLITDKIFGEPISLTKIVCSSDSSAHRDQRRYSDLWSRGLDYGEPHYIQHTSSEEVPKILHHVNDLFDEVLQSNLSTKKALKFLGEIHWWLAHAMPDERGSAAKSELCVRAIAQAKGLDLPPMKSGIVPDLEAMTMSREQFIKQYPSMFDD	972	323
Psy0519_AvrB2a_1	Psy0519	AvrB	AvrB	AvrB	AvrB2	15	73	38	ATGGGATGCATTACTTCAAAACCACTGGTTAGCTCTCCCCGGTGGCATAATTCAGCTACTAATTCCGAAAATTTAGAAACTGGTCAAAGAAGCCATAAAGCCTCTCTTTATGGTGCTATTTCTGGATCACCGGAAAGGAGTGAATTGACTTGGCATCAGCAGTCGTTGGTTGGCGTAGCCCGATGGCCTGACAAAGAATATAATAGAGATCATGTCCCCCTGCAAATGGAATACGGTAGGTCTTTTTGGAATGAGTCGCGAAAAATAGGAAGTGCATTAGCTAATGGTGAAATTCAGAATTTTGAAGACTTATGGGAGAAAGCACGCGATTGGCGATGTTCAATGGCTAATCATGATGAGAATATATTTAAGAAACCTCGCAATAGTTATAATGAGTTT…	MGCITSKPLVSSPRWHNSATNSENLETGQRSHKASLYGAISGSPERSELTWHQQSLVGVARWPDKEYNRDHVPLQMEYGRSFWNESRKIGSALANGEIQNFEDLWEKARDWRCSMANHDENIFKKPRNSYNEFPFTTPLINQYNYIKERYSARTDGSLQKLDDEGLLPPAKEFLITDKIFGEPISLTKIVCSSDSSAHRDQRRYSDLWSRGLDYGEPHYIQHTSSEEVPKILHHVNDLFNEVLQSNLSTKKALKFLGEIHWWLAHAMPDERGSAAKSELCVRAIAQAKGLDLPPMKSGIVPDLEAMTMSREQFIKQYPSMFDD	972	323
Psy0521_AvrB2a_1	Psy0521	AvrB	AvrB	AvrB	AvrB2	15	73	39	ATGGGATGCATTACTTCAAAACCACTGGTTAGCTCTCCCCAGTGGCATAATTCAGCTACTAATTCCGAAAATTTAGAAACTGGTCAAAGAAGCCATAAAGCCTCTCTTTATGGTGCTATGTCTGGATCACCGGAAAGGAGTGAATTGACTTGGCATCAGCAGTCGTTGGTTGGCGTAGCCCGATGGCCTGACAAAGAATATAATAGAGATCATGTCCCCCTGCAAATGGAATACGGTAGGTCTTTTTGGAATGAGTCGCGAAAAATAGGAAGTGCATTAGCTAATGGTGAAATTCAGAATTTTGAAGACTTATGGGAGAAAGCACGCGATTGGCGATGTTCAATGGCTAATCATGATGAGAATATATTTAAGAAACCTCGCAATAGTTATAATGAGTTT…	MGCITSKPLVSSPQWHNSATNSENLETGQRSHKASLYGAMSGSPERSELTWHQQSLVGVARWPDKEYNRDHVPLQMEYGRSFWNESRKIGSALANGEIQNFEDLWEKARDWRCSMANHDENIFKKPRNSYNEFPFTTPLINQYNYIKERYSARTDGSLQKLDDEGLLPPAKEFLITDKIFGEPISLTKIVCSSDSSAHRDQRRYSDLWSRGLDYGEPHYIQHTSSEEVPKILHHVNDLFNEVLQSNLSTKKALKFLGEIHWWLAHAMPDERGSAAKSELCVRAIAQAKGLDLPPMKSGIVPDLEAMTMSREQFIKQYPSMFDD	972	323
Psy0524_AvrB2a_1	Psy0524	AvrB	AvrB	AvrB	AvrB2	15	73	40	TTGACTTGGCATCAGCAGTCGTTGGTTGGCGTAGCCCGATGGCCTGACAAAGAATATAATAGAGATCATGTCCCCCTGCAAATGGAATACGGTAGGTCTTTTTGGAATGAGTCGCGAAAAATAGGAAGTGCATTAGCTAATGGTGAAATTCAGAATTTTGAAGACTTATGGGAGAAAGCACGCGATTGGCGATGTTCAATGGCTAATCATGATGAGAATATATTTAAGAAACCTCGCAATAGTTATAATGAGTTTCCTTTTACAACCCCATTAATAAATCAATACAATTATATTAAAGAAAGATATAGTGCCCGTACTGATGGGAGCTTGCAAAAACTCGATGATGAAGGCTTATTGCCACCAGCAAAAGAATTTTTGATAACGGATAAGATTTTTGGA…	MTWHQQSLVGVARWPDKEYNRDHVPLQMEYGRSFWNESRKIGSALANGEIQNFEDLWEKARDWRCSMANHDENIFKKPRNSYNEFPFTTPLINQYNYIKERYSARTDGSLQKLDDEGLLPPAKEFLITDKIFGEPISLTKIVCSSDSSAHRDQRRYSDLWSRGLDYGEPHYIQHTSSEEVPKILHHVNDLFDEVLQSNLSTKKALKFLGEIHWWLAHAMPDERGSAAKSELCVRAIAQAKGLDLPPMKSGIVPDLEAMTMSREQFIKQYPSMFDD	828	275
Psy0528_AvrB2a_1	Psy0528	AvrB	AvrB	AvrB	AvrB2	15	73	41	ATGGGATGCATTACTTCAAAACCACTGGTTAGCTCTCCCCGGTGGCATAATTCAGCTACTAATTCCGAAAATTTAGAAACTGGTCAAAGAAGCCATAAAGCCTCTCTTTATGGTGCTATGTCTGGATCACCGGAAAGGAGTGAATTGACTTGGCATCAGCAGTCGTTGGTTGGCGTAGCCCGATGGCCTGACAAAGAATATAATAGAGATCATGTCCCCCTGCAAATGGAATACGGTAGGTCTTTTTGGAATGAGTCGCGAAAAATAGGAAGTGCATTAGCTAATGGTGAAATTCAGAATTTTGAAGACTTATGGGAGAAAGCACGCGATTGGCGATGTTCAATGGCTAATCATGATGAGAATATATTTAAGAAACCTCGCAATAGTTATAATGAGTTT…	MGCITSKPLVSSPRWHNSATNSENLETGQRSHKASLYGAMSGSPERSELTWHQQSLVGVARWPDKEYNRDHVPLQMEYGRSFWNESRKIGSALANGEIQNFEDLWEKARDWRCSMANHDENIFKKPRNSYNEFPFTTPLINQYNYIKERYSARTDGSLQKLDDEGLLPPAKEFLITDKIFGEPISLTKIVCSSDSSAHRDQRRYSDLWSRGLDYGEPHYIQHTSSEEVPKILHHVNDLFDEVLQSNLSTKKALKFLGEIHWWLAHAMPDERGSAAKSELCVRAIAQAKGLDLPPMKSGIVPDLEAMTMSREQFIKQYPSMFDD	972	323
Psy0530_AvrB2a_1	Psy0530	AvrB	AvrB	AvrB	AvrB2	15	73	42	ATGGGATGCATTACTTCAAAACCACTGGTTAGCTCTCCCCAGTGGCATAATTCAGCTACTAATTCCGAAAATTTAGAAACTGGTCAAAGAAGCCATAAAGCCTCTCTTTATGGTGCTATTTCTGGATCACCGGAAAGGAGTGAATTGACTTGGCATCAGCAGTCGTTGGTTGGCGTAGCCCGATGGCCTGACAAAGAATATAATAGAGATCATGTCCCCCTGCAAATGGAATACGGTAGGTCTTTTTGGAATGAGTCGCGAAAAATAGGAAGTGCATTAGCTAATGGTGAAATTCAGAATTTTGAAGACTTATGGGAGAAAGCACGCGATTGGCGATGTTCAATGGCTAATCATGATGAGAATATATTTAAGAAACCTCGCAATAGTTATAATGAGTTT…	MGCITSKPLVSSPQWHNSATNSENLETGQRSHKASLYGAISGSPERSELTWHQQSLVGVARWPDKEYNRDHVPLQMEYGRSFWNESRKIGSALANGEIQNFEDLWEKARDWRCSMANHDENIFKKPRNSYNEFPFTTPLINQYNYIKERYSARTDGSLQKLDDEGLLPPAKEFLITDKIFGEPISLTKIVCSSDSSAHRDQRRYSDLWSRGLDYGEPHYIQHTSSEEVPKILHHVNDLFNEVLQSNLSTKKALKFLGEIHWWLAHAMPDERGSAAKSELCVRAIAQAKGLDLPPMKSGIVPDLEAMTMSREQFIKQYPSMFDD	972	323
Psy0531_AvrB2a_1	Psy0531	AvrB	AvrB	AvrB	AvrB2	15	73	43	ATGGGATGCATTACTTCAAAACCACTGGTTAGCTCTCCCCGGTGGCATAATTCAGCTACTAATTCCGAAAATTTAGAAACTGGTCAAAGAAGCCATAAAGCCTCTCTTTATGGTGCTATGTCTGGATCACCGGAAAGGAGTGAATTGACTTGGCATCAGCAGTCGTTGGTTGGCGTAGCCCGATGGCCTGACAAAGAATATAATAGAGATCATGTCCCCCTGCAAATGGAATACGGTAGGTCTTTTTGGAATGAGTCGCGAAAAATAGGAAGTGCATTAGCTAATGGTGAAATTCAGAATTTTGAAGACTTATGGGAGAAAGCACGCGATTGGCGATGTTCAATGGCTAATCATGATGAGAATATATTTAAGAAACCTCGCAATAGTTATAATGAGTTT…	MGCITSKPLVSSPRWHNSATNSENLETGQRSHKASLYGAMSGSPERSELTWHQQSLVGVARWPDKEYNRDHVPLQMEYGRSFWNESRKIGSALANGEIQNFEDLWEKARDWRCSMANHDENIFKKPRNSYNEFPFTTPLINQYNYIKERYSARTDGSLQKLDDEGLLPPAKEFLITDKIFGEPISLTKIVCSSDSSAHRDQRRYSDLWSRGLDYGEPHYIQHTSSEEVPKILHHVNDLFNEVLQSNLSTKKALKFLGEIHWWLAHAMPDERGSAAKSELCVRAIAQAKGLDLPPMKSGIVPDLEAMTMSREQFIKQYPSMFDD	972	323
Psy0535_AvrB2a_1	Psy0535	AvrB	AvrB	AvrB	AvrB2	15	73	44	TTGACTTGGCATCAGCAGTCGTTGGTTGGCGTAGCCCGATGGCCTGACAAAGAATATAATAGAGATCATGTCCCCCTGCAAATGGAATACGGTAGGTCTTTTTGGAATGAGTCGCGAAAAATAGGAAGTGCATTAGCTAATGGTGAAATTCAGAATTTTGAAGACTTATGGGAGAAAGCACGCGATTGGCGATGTTCAATGGCTAATCATGATGAGAATATATTTAAGAAACCTCGCAATAGTTATAATGAGTTTCCTTTTACAACCCCATTAATAAATCAATACAATTATATTAAAGAAAGATATAGTGCCCGTACTGATGGGAGCTTGCAAAAACTCGATGATGAAGGCTTATTGCCACCAGCAAAAGAATTTTTGATAACGGATAAGATTTTTGGA…	MTWHQQSLVGVARWPDKEYNRDHVPLQMEYGRSFWNESRKIGSALANGEIQNFEDLWEKARDWRCSMANHDENIFKKPRNSYNEFPFTTPLINQYNYIKERYSARTDGSLQKLDDEGLLPPAKEFLITDKIFGEPISLTKIVCSSDSSAHRDQRRYSDLWSRGLDYGEPHYIQHTSSEEVPKILHHVNDLFNEVLQSNLSTKKALKFLGEIHWWLAHAMPDERGSAAKSELCVRAIAQAKGLDLPPMKSGIVPDLEAMTMSREQFIKQYPSMFDD	828	275
Pae0893_23_AvrB2b_1	Pae0893_23	AvrB	AvrB	AvrB	AvrB2	15	73	45	ATGGGATGTATATCATCGAAACCTCAGGTAATGTCTCCTTCCCGTCATTACTCTTCACCTGACGCGGAGCCTGCTACCGCTAGAACATCGCATCGTAGGTCAGCTCGTTATGGTGAATTATCGGGCCCTCCAGCACAAACCGGCTTAACGTATTATCAGCAATCGTTAATTGGCGTAGCTCGCTGGCCCGATCCTCAGTATAACCAGGACCATCTTCCTCATCAGATGGAATATGGTCGTTCCTTCTTCGATGCGTCTCGCCACGCAGGTGCTGGCATTGCTTCGGGTCAAGTTCAAGCATTTAGCCAATTGTGGGCCTTGGCACAGCGCTGGAGAAGCGAAGCTGCTGGCGGAGATTACGAAACTTTTGGCGAGGAAAGCGAGCGATACCCAACTTAC…	MGCISSKPQVMSPSRHYSSPDAEPATARTSHRRSARYGELSGPPAQTGLTYYQQSLIGVARWPDPQYNQDHLPHQMEYGRSFFDASRHAGAGIASGQVQAFSQLWALAQRWRSEAAGGDYETFGEESERYPTYNHNPTTPLANQYAYILDRYRNREDGEFSEDVEGVPTHEFPLRDEINGKPITLSTVVVSADPDANRYDSRYSAIRHLEAGEPFYIRHTFSADVPEVLAHVEELYNQALDASVSDSQALSILGEIHWWVANAMPDHRGSAAKTEFSVRAIAMARGMELPPMRHGIVADLEAMTTSREAFVRHYNNFFDR	963	320
Pae3681_AvrB2b_1	Pae3681	AvrB	AvrB	AvrB	AvrB2	15	73	45	ATGGGATGTATATCATCGAAACCTCAGGTAATGTCTCCTTCCCGTCATTACTCTTCACCTGACGCGGAGCCTGCTACCGCTAGAACATCGCATCGTAGGTCAGCTCGTTATGGTGAATTATCGGGCCCTCCAGCACAAACCGGCTTAACGTATTATCAGCAATCGTTAATTGGCGTAGCTCGCTGGCCCGATCCTCAGTATAACCAGGACCATCTTCCTCATCAGATGGAATATGGTCGTTCCTTCTTCGATGCGTCTCGCCACGCAGGTGCTGGCATTGCTTCGGGTCAAGTTCAAGCATTTAGCCAATTGTGGGCCTTGGCACAGCGCTGGAGAAGCGAAGCTGCTGGCGGAGATTACGAAACTTTTGGCGAGGAAAGCGAGCGATACCCAACTTAC…	MGCISSKPQVMSPSRHYSSPDAEPATARTSHRRSARYGELSGPPAQTGLTYYQQSLIGVARWPDPQYNQDHLPHQMEYGRSFFDASRHAGAGIASGQVQAFSQLWALAQRWRSEAAGGDYETFGEESERYPTYNHNPTTPLANQYAYILDRYRNREDGEFSEDVEGVPTHEFPLRDEINGKPITLSTVVVSADPDANRYDSRYSAIRHLEAGEPFYIRHTFSADVPEVLAHVEELYNQALDASVSDSQALSILGEIHWWVANAMPDHRGSAAKTEFSVRAIAMARGMELPPMRHGIVADLEAMTTSREAFVRHYNNFFDR	963	320
PaeICMP8947_AvrB2b_1	PaeICMP8947	AvrB	AvrB	AvrB	AvrB2	15	73	45	ATGGGATGTATATCATCGAAACCTCAGGTAATGTCTCCTTCCCGTCATTACTCTTCACCTGACGCGGAGCCTGCTACCGCTAGAACATCGCATCGTAGGTCAGCTCGTTATGGTGAATTATCGGGCCCTCCAGCACAAACCGGCTTAACGTATTATCAGCAATCGTTAATTGGCGTAGCTCGCTGGCCCGATCCTCAGTATAACCAGGACCATCTTCCTCATCAGATGGAATATGGTCGTTCCTTCTTCGATGCGTCTCGCCACGCAGGTGCTGGCATTGCTTCGGGTCAAGTTCAAGCATTTAGCCAATTGTGGGCCTTGGCACAGCGCTGGAGAAGCGAAGCTGCTGGCGGAGATTACGAAACTTTTGGCGAGGAAAGCGAGCGATACCCAACTTAC…	MGCISSKPQVMSPSRHYSSPDAEPATARTSHRRSARYGELSGPPAQTGLTYYQQSLIGVARWPDPQYNQDHLPHQMEYGRSFFDASRHAGAGIASGQVQAFSQLWALAQRWRSEAAGGDYETFGEESERYPTYNHNPTTPLANQYAYILDRYRNREDGEFSEDVEGVPTHEFPLRDEINGKPITLSTVVVSADPDANRYDSRYSAIRHLEAGEPFYIRHTFSADVPEVLAHVEELYNQALDASVSDSQALSILGEIHWWVANAMPDHRGSAAKTEFSVRAIAMARGMELPPMRHGIVADLEAMTTSREAFVRHYNNFFDR	963	320
Pae2250_AvrB2b_1	Pae2250	AvrB	AvrB	AvrB	AvrB2	15	73	46	ATGGGATGTATATCATCGAAACCTCAGGTAATGTCTCCTTCCCGTCATTACTCTTCACCTGACGCGGAGCCTGCTACCGCTAGAACATCGCATCGTAGGTCAGCTCGTTATGGTGAATTATCGGGCCCTCCAGCACAAACCGGCTTAACGTATTATCAGCAATCGTTAATTGGCGTAGCTCGCTGGCCCGATCCTCAGTATAACCAGGACCATCTTCCTCATCAGATGGAATATGGTCGTTCCTTCTTCGATGCGTCTCGCCACGCAGGTGCTGGCATTGCTTCGGGTCAAGTTCAAGCATTTAGCCAATTGTGGGCCTTGGCACAGCGCTGGAGAAGCGAAGCTGCTGGCGGAGATTACGAAACTTTTGGCGAGGAAAGCGAGCGATACCCAACTTAC…	MGCISSKPQVMSPSRHYSSPDAEPATARTSHRRSARYGELSGPPAQTGLTYYQQSLIGVARWPDPQYNQDHLPHQMEYGRSFFDASRHAGAGIASGQVQAFSQLWALAQRWRSEAAGGDYETFGEESERYPTYNHNPTTPLANQYAYILDRYRNREDGEFSEDVEGVPTHEFPLRDEINGKPITLSTVVVSADPDANRYDSRYSAIRHLEAGEPFYIRHTFSADVPEVLAHVEELYNQALDASVSDSQALSILGEIHWWVANAMPDHRGSAAKTEFSVRAIAMARGMELPPMRHGIVADLEAMTTSREAFVRHYNNFFDR	963	320
PsaCFBP7286_AvrB2b_1	PsaCFBP7286	AvrB	AvrB	AvrB	AvrB2	15	73	46	ATGGGATGTATATCATCGAAACCTCAGGTAATGTCTCCTTCCCGTCATTACTCTTCACCTGACGCGGAGCCTGCTACCGCTAGAACATCGCATCGTAGGTCAGCTCGTTATGGTGAATTATCGGGCCCTCCAGCACAAACCGGCTTAACGTATTATCAGCAATCGTTAATTGGCGTAGCTCGCTGGCCCGATCCTCAGTATAACCAGGACCATCTTCCTCATCAGATGGAATATGGTCGTTCCTTCTTCGATGCGTCTCGCCACGCAGGTGCTGGCATTGCTTCGGGTCAAGTTCAAGCATTTAGCCAATTGTGGGCCTTGGCACAGCGCTGGAGAAGCGAAGCTGCTGGCGGAGATTACGAAACTTTTGGCGAGGAAAGCGAGCGATACCCAACTTAC…	MGCISSKPQVMSPSRHYSSPDAEPATARTSHRRSARYGELSGPPAQTGLTYYQQSLIGVARWPDPQYNQDHLPHQMEYGRSFFDASRHAGAGIASGQVQAFSQLWALAQRWRSEAAGGDYETFGEESERYPTYNHNPTTPLANQYAYILDRYRNREDGEFSEDVEGVPTHEFPLRDEINGKPITLSTVVVSADPDANRYDSRYSAIRHLEAGEPFYIRHTFSADVPEVLAHVEELYNQALDASVSDSQALSILGEIHWWVANAMPDHRGSAAKTEFSVRAIAMARGMELPPMRHGIVADLEAMTTSREAFVRHYNNFFDR	963	320
PsaCH2010_6_AvrB2b_1	PsaCH2010_6	AvrB	AvrB	AvrB	AvrB2	15	73	46	ATGGGATGTATATCATCGAAACCTCAGGTAATGTCTCCTTCCCGTCATTACTCTTCACCTGACGCGGAGCCTGCTACCGCTAGAACATCGCATCGTAGGTCAGCTCGTTATGGTGAATTATCGGGCCCTCCAGCACAAACCGGCTTAACGTATTATCAGCAATCGTTAATTGGCGTAGCTCGCTGGCCCGATCCTCAGTATAACCAGGACCATCTTCCTCATCAGATGGAATATGGTCGTTCCTTCTTCGATGCGTCTCGCCACGCAGGTGCTGGCATTGCTTCGGGTCAAGTTCAAGCATTTAGCCAATTGTGGGCCTTGGCACAGCGCTGGAGAAGCGAAGCTGCTGGCGGAGATTACGAAACTTTTGGCGAGGAAAGCGAGCGATACCCAACTTAC…	MGCISSKPQVMSPSRHYSSPDAEPATARTSHRRSARYGELSGPPAQTGLTYYQQSLIGVARWPDPQYNQDHLPHQMEYGRSFFDASRHAGAGIASGQVQAFSQLWALAQRWRSEAAGGDYETFGEESERYPTYNHNPTTPLANQYAYILDRYRNREDGEFSEDVEGVPTHEFPLRDEINGKPITLSTVVVSADPDANRYDSRYSAIRHLEAGEPFYIRHTFSADVPEVLAHVEELYNQALDASVSDSQALSILGEIHWWVANAMPDHRGSAAKTEFSVRAIAMARGMELPPMRHGIVADLEAMTTSREAFVRHYNNFFDR	963	320
PsaCRAFRU8_43_AvrB2b_1	PsaCRAFRU8_43	AvrB	AvrB	AvrB	AvrB2	15	73	46	ATGGGATGTATATCATCGAAACCTCAGGTAATGTCTCCTTCCCGTCATTACTCTTCACCTGACGCGGAGCCTGCTACCGCTAGAACATCGCATCGTAGGTCAGCTCGTTATGGTGAATTATCGGGCCCTCCAGCACAAACCGGCTTAACGTATTATCAGCAATCGTTAATTGGCGTAGCTCGCTGGCCCGATCCTCAGTATAACCAGGACCATCTTCCTCATCAGATGGAATATGGTCGTTCCTTCTTCGATGCGTCTCGCCACGCAGGTGCTGGCATTGCTTCGGGTCAAGTTCAAGCATTTAGCCAATTGTGGGCCTTGGCACAGCGCTGGAGAAGCGAAGCTGCTGGCGGAGATTACGAAACTTTTGGCGAGGAAAGCGAGCGATACCCAACTTAC…	MGCISSKPQVMSPSRHYSSPDAEPATARTSHRRSARYGELSGPPAQTGLTYYQQSLIGVARWPDPQYNQDHLPHQMEYGRSFFDASRHAGAGIASGQVQAFSQLWALAQRWRSEAAGGDYETFGEESERYPTYNHNPTTPLANQYAYILDRYRNREDGEFSEDVEGVPTHEFPLRDEINGKPITLSTVVVSADPDANRYDSRYSAIRHLEAGEPFYIRHTFSADVPEVLAHVEELYNQALDASVSDSQALSILGEIHWWVANAMPDHRGSAAKTEFSVRAIAMARGMELPPMRHGIVADLEAMTTSREAFVRHYNNFFDR	963	320
PsaICMP18708_AvrB2b_1	PsaICMP18708	AvrB	AvrB	AvrB	AvrB2	15	73	46	ATGGGATGTATATCATCGAAACCTCAGGTAATGTCTCCTTCCCGTCATTACTCTTCACCTGACGCGGAGCCTGCTACCGCTAGAACATCGCATCGTAGGTCAGCTCGTTATGGTGAATTATCGGGCCCTCCAGCACAAACCGGCTTAACGTATTATCAGCAATCGTTAATTGGCGTAGCTCGCTGGCCCGATCCTCAGTATAACCAGGACCATCTTCCTCATCAGATGGAATATGGTCGTTCCTTCTTCGATGCGTCTCGCCACGCAGGTGCTGGCATTGCTTCGGGTCAAGTTCAAGCATTTAGCCAATTGTGGGCCTTGGCACAGCGCTGGAGAAGCGAAGCTGCTGGCGGAGATTACGAAACTTTTGGCGAGGAAAGCGAGCGATACCCAACTTAC…	MGCISSKPQVMSPSRHYSSPDAEPATARTSHRRSARYGELSGPPAQTGLTYYQQSLIGVARWPDPQYNQDHLPHQMEYGRSFFDASRHAGAGIASGQVQAFSQLWALAQRWRSEAAGGDYETFGEESERYPTYNHNPTTPLANQYAYILDRYRNREDGEFSEDVEGVPTHEFPLRDEINGKPITLSTVVVSADPDANRYDSRYSAIRHLEAGEPFYIRHTFSADVPEVLAHVEELYNQALDASVSDSQALSILGEIHWWVANAMPDHRGSAAKTEFSVRAIAMARGMELPPMRHGIVADLEAMTTSREAFVRHYNNFFDR	963	320
PsaICMP18744_AvrB2b_1	PsaICMP18744	AvrB	AvrB	AvrB	AvrB2	15	73	46	ATGGGATGTATATCATCGAAACCTCAGGTAATGTCTCCTTCCCGTCATTACTCTTCACCTGACGCGGAGCCTGCTACCGCTAGAACATCGCATCGTAGGTCAGCTCGTTATGGTGAATTATCGGGCCCTCCAGCACAAACCGGCTTAACGTATTATCAGCAATCGTTAATTGGCGTAGCTCGCTGGCCCGATCCTCAGTATAACCAGGACCATCTTCCTCATCAGATGGAATATGGTCGTTCCTTCTTCGATGCGTCTCGCCACGCAGGTGCTGGCATTGCTTCGGGTCAAGTTCAAGCATTTAGCCAATTGTGGGCCTTGGCACAGCGCTGGAGAAGCGAAGCTGCTGGCGGAGATTACGAAACTTTTGGCGAGGAAAGCGAGCGATACCCAACTTAC…	MGCISSKPQVMSPSRHYSSPDAEPATARTSHRRSARYGELSGPPAQTGLTYYQQSLIGVARWPDPQYNQDHLPHQMEYGRSFFDASRHAGAGIASGQVQAFSQLWALAQRWRSEAAGGDYETFGEESERYPTYNHNPTTPLANQYAYILDRYRNREDGEFSEDVEGVPTHEFPLRDEINGKPITLSTVVVSADPDANRYDSRYSAIRHLEAGEPFYIRHTFSADVPEVLAHVEELYNQALDASVSDSQALSILGEIHWWVANAMPDHRGSAAKTEFSVRAIAMARGMELPPMRHGIVADLEAMTTSREAFVRHYNNFFDR	963	320
PsaICMP18800_AvrB2b_1	PsaICMP18800	AvrB	AvrB	AvrB	AvrB2	15	73	46	ATGGGATGTATATCATCGAAACCTCAGGTAATGTCTCCTTCCCGTCATTACTCTTCACCTGACGCGGAGCCTGCTACCGCTAGAACATCGCATCGTAGGTCAGCTCGTTATGGTGAATTATCGGGCCCTCCAGCACAAACCGGCTTAACGTATTATCAGCAATCGTTAATTGGCGTAGCTCGCTGGCCCGATCCTCAGTATAACCAGGACCATCTTCCTCATCAGATGGAATATGGTCGTTCCTTCTTCGATGCGTCTCGCCACGCAGGTGCTGGCATTGCTTCGGGTCAAGTTCAAGCATTTAGCCAATTGTGGGCCTTGGCACAGCGCTGGAGAAGCGAAGCTGCTGGCGGAGATTACGAAACTTTTGGCGAGGAAAGCGAGCGATACCCAACTTAC…	MGCISSKPQVMSPSRHYSSPDAEPATARTSHRRSARYGELSGPPAQTGLTYYQQSLIGVARWPDPQYNQDHLPHQMEYGRSFFDASRHAGAGIASGQVQAFSQLWALAQRWRSEAAGGDYETFGEESERYPTYNHNPTTPLANQYAYILDRYRNREDGEFSEDVEGVPTHEFPLRDEINGKPITLSTVVVSADPDANRYDSRYSAIRHLEAGEPFYIRHTFSADVPEVLAHVEELYNQALDASVSDSQALSILGEIHWWVANAMPDHRGSAAKTEFSVRAIAMARGMELPPMRHGIVADLEAMTTSREAFVRHYNNFFDR	963	320
PsaICMP18801_AvrB2b_1	PsaICMP18801	AvrB	AvrB	AvrB	AvrB2	15	73	46	ATGGGATGTATATCATCGAAACCTCAGGTAATGTCTCCTTCCCGTCATTACTCTTCACCTGACGCGGAGCCTGCTACCGCTAGAACATCGCATCGTAGGTCAGCTCGTTATGGTGAATTATCGGGCCCTCCAGCACAAACCGGCTTAACGTATTATCAGCAATCGTTAATTGGCGTAGCTCGCTGGCCCGATCCTCAGTATAACCAGGACCATCTTCCTCATCAGATGGAATATGGTCGTTCCTTCTTCGATGCGTCTCGCCACGCAGGTGCTGGCATTGCTTCGGGTCAAGTTCAAGCATTTAGCCAATTGTGGGCCTTGGCACAGCGCTGGAGAAGCGAAGCTGCTGGCGGAGATTACGAAACTTTTGGCGAGGAAAGCGAGCGATACCCAACTTAC…	MGCISSKPQVMSPSRHYSSPDAEPATARTSHRRSARYGELSGPPAQTGLTYYQQSLIGVARWPDPQYNQDHLPHQMEYGRSFFDASRHAGAGIASGQVQAFSQLWALAQRWRSEAAGGDYETFGEESERYPTYNHNPTTPLANQYAYILDRYRNREDGEFSEDVEGVPTHEFPLRDEINGKPITLSTVVVSADPDANRYDSRYSAIRHLEAGEPFYIRHTFSADVPEVLAHVEELYNQALDASVSDSQALSILGEIHWWVANAMPDHRGSAAKTEFSVRAIAMARGMELPPMRHGIVADLEAMTTSREAFVRHYNNFFDR	963	320
PsaICMP18884_AvrB2b_1	PsaICMP18884	AvrB	AvrB	AvrB	AvrB2	15	73	46	ATGGGATGTATATCATCGAAACCTCAGGTAATGTCTCCTTCCCGTCATTACTCTTCACCTGACGCGGAGCCTGCTACCGCTAGAACATCGCATCGTAGGTCAGCTCGTTATGGTGAATTATCGGGCCCTCCAGCACAAACCGGCTTAACGTATTATCAGCAATCGTTAATTGGCGTAGCTCGCTGGCCCGATCCTCAGTATAACCAGGACCATCTTCCTCATCAGATGGAATATGGTCGTTCCTTCTTCGATGCGTCTCGCCACGCAGGTGCTGGCATTGCTTCGGGTCAAGTTCAAGCATTTAGCCAATTGTGGGCCTTGGCACAGCGCTGGAGAAGCGAAGCTGCTGGCGGAGATTACGAAACTTTTGGCGAGGAAAGCGAGCGATACCCAACTTAC…	MGCISSKPQVMSPSRHYSSPDAEPATARTSHRRSARYGELSGPPAQTGLTYYQQSLIGVARWPDPQYNQDHLPHQMEYGRSFFDASRHAGAGIASGQVQAFSQLWALAQRWRSEAAGGDYETFGEESERYPTYNHNPTTPLANQYAYILDRYRNREDGEFSEDVEGVPTHEFPLRDEINGKPITLSTVVVSADPDANRYDSRYSAIRHLEAGEPFYIRHTFSADVPEVLAHVEELYNQALDASVSDSQALSILGEIHWWVANAMPDHRGSAAKTEFSVRAIAMARGMELPPMRHGIVADLEAMTTSREAFVRHYNNFFDR	963	320
PsaICMP18886_AvrB2b_1	PsaICMP18886	AvrB	AvrB	AvrB	AvrB2	15	73	46	ATGGGATGTATATCATCGAAACCTCAGGTAATGTCTCCTTCCCGTCATTACTCTTCACCTGACGCGGAGCCTGCTACCGCTAGAACATCGCATCGTAGGTCAGCTCGTTATGGTGAATTATCGGGCCCTCCAGCACAAACCGGCTTAACGTATTATCAGCAATCGTTAATTGGCGTAGCTCGCTGGCCCGATCCTCAGTATAACCAGGACCATCTTCCTCATCAGATGGAATATGGTCGTTCCTTCTTCGATGCGTCTCGCCACGCAGGTGCTGGCATTGCTTCGGGTCAAGTTCAAGCATTTAGCCAATTGTGGGCCTTGGCACAGCGCTGGAGAAGCGAAGCTGCTGGCGGAGATTACGAAACTTTTGGCGAGGAAAGCGAGCGATACCCAACTTAC…	MGCISSKPQVMSPSRHYSSPDAEPATARTSHRRSARYGELSGPPAQTGLTYYQQSLIGVARWPDPQYNQDHLPHQMEYGRSFFDASRHAGAGIASGQVQAFSQLWALAQRWRSEAAGGDYETFGEESERYPTYNHNPTTPLANQYAYILDRYRNREDGEFSEDVEGVPTHEFPLRDEINGKPITLSTVVVSADPDANRYDSRYSAIRHLEAGEPFYIRHTFSADVPEVLAHVEELYNQALDASVSDSQALSILGEIHWWVANAMPDHRGSAAKTEFSVRAIAMARGMELPPMRHGIVADLEAMTTSREAFVRHYNNFFDR	963	320
PsaICMP19073_AvrB2b_1	PsaICMP19073	AvrB	AvrB	AvrB	AvrB2	15	73	46	ATGGGATGTATATCATCGAAACCTCAGGTAATGTCTCCTTCCCGTCATTACTCTTCACCTGACGCGGAGCCTGCTACCGCTAGAACATCGCATCGTAGGTCAGCTCGTTATGGTGAATTATCGGGCCCTCCAGCACAAACCGGCTTAACGTATTATCAGCAATCGTTAATTGGCGTAGCTCGCTGGCCCGATCCTCAGTATAACCAGGACCATCTTCCTCATCAGATGGAATATGGTCGTTCCTTCTTCGATGCGTCTCGCCACGCAGGTGCTGGCATTGCTTCGGGTCAAGTTCAAGCATTTAGCCAATTGTGGGCCTTGGCACAGCGCTGGAGAAGCGAAGCTGCTGGCGGAGATTACGAAACTTTTGGCGAGGAAAGCGAGCGATACCCAACTTAC…	MGCISSKPQVMSPSRHYSSPDAEPATARTSHRRSARYGELSGPPAQTGLTYYQQSLIGVARWPDPQYNQDHLPHQMEYGRSFFDASRHAGAGIASGQVQAFSQLWALAQRWRSEAAGGDYETFGEESERYPTYNHNPTTPLANQYAYILDRYRNREDGEFSEDVEGVPTHEFPLRDEINGKPITLSTVVVSADPDANRYDSRYSAIRHLEAGEPFYIRHTFSADVPEVLAHVEELYNQALDASVSDSQALSILGEIHWWVANAMPDHRGSAAKTEFSVRAIAMARGMELPPMRHGIVADLEAMTTSREAFVRHYNNFFDR	963	320
PsaICMP19079_AvrB2b_1	PsaICMP19079	AvrB	AvrB	AvrB	AvrB2	15	73	46	ATGGGATGTATATCATCGAAACCTCAGGTAATGTCTCCTTCCCGTCATTACTCTTCACCTGACGCGGAGCCTGCTACCGCTAGAACATCGCATCGTAGGTCAGCTCGTTATGGTGAATTATCGGGCCCTCCAGCACAAACCGGCTTAACGTATTATCAGCAATCGTTAATTGGCGTAGCTCGCTGGCCCGATCCTCAGTATAACCAGGACCATCTTCCTCATCAGATGGAATATGGTCGTTCCTTCTTCGATGCGTCTCGCCACGCAGGTGCTGGCATTGCTTCGGGTCAAGTTCAAGCATTTAGCCAATTGTGGGCCTTGGCACAGCGCTGGAGAAGCGAAGCTGCTGGCGGAGATTACGAAACTTTTGGCGAGGAAAGCGAGCGATACCCAACTTAC…	MGCISSKPQVMSPSRHYSSPDAEPATARTSHRRSARYGELSGPPAQTGLTYYQQSLIGVARWPDPQYNQDHLPHQMEYGRSFFDASRHAGAGIASGQVQAFSQLWALAQRWRSEAAGGDYETFGEESERYPTYNHNPTTPLANQYAYILDRYRNREDGEFSEDVEGVPTHEFPLRDEINGKPITLSTVVVSADPDANRYDSRYSAIRHLEAGEPFYIRHTFSADVPEVLAHVEELYNQALDASVSDSQALSILGEIHWWVANAMPDHRGSAAKTEFSVRAIAMARGMELPPMRHGIVADLEAMTTSREAFVRHYNNFFDR	963	320
PsaICMP19097_AvrB2b_1	PsaICMP19097	AvrB	AvrB	AvrB	AvrB2	15	73	46	ATGGGATGTATATCATCGAAACCTCAGGTAATGTCTCCTTCCCGTCATTACTCTTCACCTGACGCGGAGCCTGCTACCGCTAGAACATCGCATCGTAGGTCAGCTCGTTATGGTGAATTATCGGGCCCTCCAGCACAAACCGGCTTAACGTATTATCAGCAATCGTTAATTGGCGTAGCTCGCTGGCCCGATCCTCAGTATAACCAGGACCATCTTCCTCATCAGATGGAATATGGTCGTTCCTTCTTCGATGCGTCTCGCCACGCAGGTGCTGGCATTGCTTCGGGTCAAGTTCAAGCATTTAGCCAATTGTGGGCCTTGGCACAGCGCTGGAGAAGCGAAGCTGCTGGCGGAGATTACGAAACTTTTGGCGAGGAAAGCGAGCGATACCCAACTTAC…	MGCISSKPQVMSPSRHYSSPDAEPATARTSHRRSARYGELSGPPAQTGLTYYQQSLIGVARWPDPQYNQDHLPHQMEYGRSFFDASRHAGAGIASGQVQAFSQLWALAQRWRSEAAGGDYETFGEESERYPTYNHNPTTPLANQYAYILDRYRNREDGEFSEDVEGVPTHEFPLRDEINGKPITLSTVVVSADPDANRYDSRYSAIRHLEAGEPFYIRHTFSADVPEVLAHVEELYNQALDASVSDSQALSILGEIHWWVANAMPDHRGSAAKTEFSVRAIAMARGMELPPMRHGIVADLEAMTTSREAFVRHYNNFFDR	963	320
PsaICMP19101_AvrB2b_1	PsaICMP19101	AvrB	AvrB	AvrB	AvrB2	15	73	46	ATGGGATGTATATCATCGAAACCTCAGGTAATGTCTCCTTCCCGTCATTACTCTTCACCTGACGCGGAGCCTGCTACCGCTAGAACATCGCATCGTAGGTCAGCTCGTTATGGTGAATTATCGGGCCCTCCAGCACAAACCGGCTTAACGTATTATCAGCAATCGTTAATTGGCGTAGCTCGCTGGCCCGATCCTCAGTATAACCAGGACCATCTTCCTCATCAGATGGAATATGGTCGTTCCTTCTTCGATGCGTCTCGCCACGCAGGTGCTGGCATTGCTTCGGGTCAAGTTCAAGCATTTAGCCAATTGTGGGCCTTGGCACAGCGCTGGAGAAGCGAAGCTGCTGGCGGAGATTACGAAACTTTTGGCGAGGAAAGCGAGCGATACCCAACTTAC…	MGCISSKPQVMSPSRHYSSPDAEPATARTSHRRSARYGELSGPPAQTGLTYYQQSLIGVARWPDPQYNQDHLPHQMEYGRSFFDASRHAGAGIASGQVQAFSQLWALAQRWRSEAAGGDYETFGEESERYPTYNHNPTTPLANQYAYILDRYRNREDGEFSEDVEGVPTHEFPLRDEINGKPITLSTVVVSADPDANRYDSRYSAIRHLEAGEPFYIRHTFSADVPEVLAHVEELYNQALDASVSDSQALSILGEIHWWVANAMPDHRGSAAKTEFSVRAIAMARGMELPPMRHGIVADLEAMTTSREAFVRHYNNFFDR	963	320
PsaICMP19439_AvrB2b_1	PsaICMP19439	AvrB	AvrB	AvrB	AvrB2	15	73	46	ATGGGATGTATATCATCGAAACCTCAGGTAATGTCTCCTTCCCGTCATTACTCTTCACCTGACGCGGAGCCTGCTACCGCTAGAACATCGCATCGTAGGTCAGCTCGTTATGGTGAATTATCGGGCCCTCCAGCACAAACCGGCTTAACGTATTATCAGCAATCGTTAATTGGCGTAGCTCGCTGGCCCGATCCTCAGTATAACCAGGACCATCTTCCTCATCAGATGGAATATGGTCGTTCCTTCTTCGATGCGTCTCGCCACGCAGGTGCTGGCATTGCTTCGGGTCAAGTTCAAGCATTTAGCCAATTGTGGGCCTTGGCACAGCGCTGGAGAAGCGAAGCTGCTGGCGGAGATTACGAAACTTTTGGCGAGGAAAGCGAGCGATACCCAACTTAC…	MGCISSKPQVMSPSRHYSSPDAEPATARTSHRRSARYGELSGPPAQTGLTYYQQSLIGVARWPDPQYNQDHLPHQMEYGRSFFDASRHAGAGIASGQVQAFSQLWALAQRWRSEAAGGDYETFGEESERYPTYNHNPTTPLANQYAYILDRYRNREDGEFSEDVEGVPTHEFPLRDEINGKPITLSTVVVSADPDANRYDSRYSAIRHLEAGEPFYIRHTFSADVPEVLAHVEELYNQALDASVSDSQALSILGEIHWWVANAMPDHRGSAAKTEFSVRAIAMARGMELPPMRHGIVADLEAMTTSREAFVRHYNNFFDR	963	320
PsaICMP19455_AvrB2b_1	PsaICMP19455	AvrB	AvrB	AvrB	AvrB2	15	73	46	ATGGGATGTATATCATCGAAACCTCAGGTAATGTCTCCTTCCCGTCATTACTCTTCACCTGACGCGGAGCCTGCTACCGCTAGAACATCGCATCGTAGGTCAGCTCGTTATGGTGAATTATCGGGCCCTCCAGCACAAACCGGCTTAACGTATTATCAGCAATCGTTAATTGGCGTAGCTCGCTGGCCCGATCCTCAGTATAACCAGGACCATCTTCCTCATCAGATGGAATATGGTCGTTCCTTCTTCGATGCGTCTCGCCACGCAGGTGCTGGCATTGCTTCGGGTCAAGTTCAAGCATTTAGCCAATTGTGGGCCTTGGCACAGCGCTGGAGAAGCGAAGCTGCTGGCGGAGATTACGAAACTTTTGGCGAGGAAAGCGAGCGATACCCAACTTAC…	MGCISSKPQVMSPSRHYSSPDAEPATARTSHRRSARYGELSGPPAQTGLTYYQQSLIGVARWPDPQYNQDHLPHQMEYGRSFFDASRHAGAGIASGQVQAFSQLWALAQRWRSEAAGGDYETFGEESERYPTYNHNPTTPLANQYAYILDRYRNREDGEFSEDVEGVPTHEFPLRDEINGKPITLSTVVVSADPDANRYDSRYSAIRHLEAGEPFYIRHTFSADVPEVLAHVEELYNQALDASVSDSQALSILGEIHWWVANAMPDHRGSAAKTEFSVRAIAMARGMELPPMRHGIVADLEAMTTSREAFVRHYNNFFDR	963	320
PsaShaanxi_M228_AvrB2b_1	PsaShaanxi_M228	AvrB	AvrB	AvrB	AvrB2	15	73	46	ATGGGATGTATATCATCGAAACCTCAGGTAATGTCTCCTTCCCGTCATTACTCTTCACCTGACGCGGAGCCTGCTACCGCTAGAACATCGCATCGTAGGTCAGCTCGTTATGGTGAATTATCGGGCCCTCCAGCACAAACCGGCTTAACGTATTATCAGCAATCGTTAATTGGCGTAGCTCGCTGGCCCGATCCTCAGTATAACCAGGACCATCTTCCTCATCAGATGGAATATGGTCGTTCCTTCTTCGATGCGTCTCGCCACGCAGGTGCTGGCATTGCTTCGGGTCAAGTTCAAGCATTTAGCCAATTGTGGGCCTTGGCACAGCGCTGGAGAAGCGAAGCTGCTGGCGGAGATTACGAAACTTTTGGCGAGGAAAGCGAGCGATACCCAACTTAC…	MGCISSKPQVMSPSRHYSSPDAEPATARTSHRRSARYGELSGPPAQTGLTYYQQSLIGVARWPDPQYNQDHLPHQMEYGRSFFDASRHAGAGIASGQVQAFSQLWALAQRWRSEAAGGDYETFGEESERYPTYNHNPTTPLANQYAYILDRYRNREDGEFSEDVEGVPTHEFPLRDEINGKPITLSTVVVSADPDANRYDSRYSAIRHLEAGEPFYIRHTFSADVPEVLAHVEELYNQALDASVSDSQALSILGEIHWWVANAMPDHRGSAAKTEFSVRAIAMARGMELPPMRHGIVADLEAMTTSREAFVRHYNNFFDR	963	320
PsaShaanxi_M7_AvrB2b_1	PsaShaanxi_M7	AvrB	AvrB	AvrB	AvrB2	15	73	46	ATGGGATGTATATCATCGAAACCTCAGGTAATGTCTCCTTCCCGTCATTACTCTTCACCTGACGCGGAGCCTGCTACCGCTAGAACATCGCATCGTAGGTCAGCTCGTTATGGTGAATTATCGGGCCCTCCAGCACAAACCGGCTTAACGTATTATCAGCAATCGTTAATTGGCGTAGCTCGCTGGCCCGATCCTCAGTATAACCAGGACCATCTTCCTCATCAGATGGAATATGGTCGTTCCTTCTTCGATGCGTCTCGCCACGCAGGTGCTGGCATTGCTTCGGGTCAAGTTCAAGCATTTAGCCAATTGTGGGCCTTGGCACAGCGCTGGAGAAGCGAAGCTGCTGGCGGAGATTACGAAACTTTTGGCGAGGAAAGCGAGCGATACCCAACTTAC…	MGCISSKPQVMSPSRHYSSPDAEPATARTSHRRSARYGELSGPPAQTGLTYYQQSLIGVARWPDPQYNQDHLPHQMEYGRSFFDASRHAGAGIASGQVQAFSQLWALAQRWRSEAAGGDYETFGEESERYPTYNHNPTTPLANQYAYILDRYRNREDGEFSEDVEGVPTHEFPLRDEINGKPITLSTVVVSADPDANRYDSRYSAIRHLEAGEPFYIRHTFSADVPEVLAHVEELYNQALDASVSDSQALSILGEIHWWVANAMPDHRGSAAKTEFSVRAIAMARGMELPPMRHGIVADLEAMTTSREAFVRHYNNFFDR	963	320
PsaTP1_AvrB2b_1	PsaTP1	AvrB	AvrB	AvrB	AvrB2	15	73	46	ATGGGATGTATATCATCGAAACCTCAGGTAATGTCTCCTTCCCGTCATTACTCTTCACCTGACGCGGAGCCTGCTACCGCTAGAACATCGCATCGTAGGTCAGCTCGTTATGGTGAATTATCGGGCCCTCCAGCACAAACCGGCTTAACGTATTATCAGCAATCGTTAATTGGCGTAGCTCGCTGGCCCGATCCTCAGTATAACCAGGACCATCTTCCTCATCAGATGGAATATGGTCGTTCCTTCTTCGATGCGTCTCGCCACGCAGGTGCTGGCATTGCTTCGGGTCAAGTTCAAGCATTTAGCCAATTGTGGGCCTTGGCACAGCGCTGGAGAAGCGAAGCTGCTGGCGGAGATTACGAAACTTTTGGCGAGGAAAGCGAGCGATACCCAACTTAC…	MGCISSKPQVMSPSRHYSSPDAEPATARTSHRRSARYGELSGPPAQTGLTYYQQSLIGVARWPDPQYNQDHLPHQMEYGRSFFDASRHAGAGIASGQVQAFSQLWALAQRWRSEAAGGDYETFGEESERYPTYNHNPTTPLANQYAYILDRYRNREDGEFSEDVEGVPTHEFPLRDEINGKPITLSTVVVSADPDANRYDSRYSAIRHLEAGEPFYIRHTFSADVPEVLAHVEELYNQALDASVSDSQALSILGEIHWWVANAMPDHRGSAAKTEFSVRAIAMARGMELPPMRHGIVADLEAMTTSREAFVRHYNNFFDR	963	320
PsaTP6_1_AvrB2b_1	PsaTP6_1	AvrB	AvrB	AvrB	AvrB2	15	73	46	ATGGGATGTATATCATCGAAACCTCAGGTAATGTCTCCTTCCCGTCATTACTCTTCACCTGACGCGGAGCCTGCTACCGCTAGAACATCGCATCGTAGGTCAGCTCGTTATGGTGAATTATCGGGCCCTCCAGCACAAACCGGCTTAACGTATTATCAGCAATCGTTAATTGGCGTAGCTCGCTGGCCCGATCCTCAGTATAACCAGGACCATCTTCCTCATCAGATGGAATATGGTCGTTCCTTCTTCGATGCGTCTCGCCACGCAGGTGCTGGCATTGCTTCGGGTCAAGTTCAAGCATTTAGCCAATTGTGGGCCTTGGCACAGCGCTGGAGAAGCGAAGCTGCTGGCGGAGATTACGAAACTTTTGGCGAGGAAAGCGAGCGATACCCAACTTAC…	MGCISSKPQVMSPSRHYSSPDAEPATARTSHRRSARYGELSGPPAQTGLTYYQQSLIGVARWPDPQYNQDHLPHQMEYGRSFFDASRHAGAGIASGQVQAFSQLWALAQRWRSEAAGGDYETFGEESERYPTYNHNPTTPLANQYAYILDRYRNREDGEFSEDVEGVPTHEFPLRDEINGKPITLSTVVVSADPDANRYDSRYSAIRHLEAGEPFYIRHTFSADVPEVLAHVEELYNQALDASVSDSQALSILGEIHWWVANAMPDHRGSAAKTEFSVRAIAMARGMELPPMRHGIVADLEAMTTSREAFVRHYNNFFDR	963	320
PbrICMP13650_AvrB2b_1	PbrICMP13650	AvrB	AvrB	AvrB	AvrB2	15	73	47	ATGGGATGTATATCATCGAAACCTCAGGTAATGTCTCCTTCCAGTCATTACTCTTCACCTGACGCGGAGCCTGCTACCGCTAGAACATCGCATCGTAGGTCAGCTCGTTATGGTGAATTATCGGGCCCTCCAGCACAAACCGGCTTAACGTATTATCAGCAATCGTTAATTGGCGTAGCTCGCTGGCCCGATCCTCAGTATAACCAGGACCATCTTCCTCATCAGATGGAATATGGTCGTTCCTTCTTCGATGCGTCTCGCCACGCAGGTGCTGGCATTGCTTCGGGTCAAGTTCAAGCATTTAGCCAATTGTGGGCCTTGGCACAGCGCTGGAGAAGCGAAGCTGCTGGCGGAGATTACGAAACTTTTGGCGAGGAAAGCGAGCGATACCCAACTTAC…	MGCISSKPQVMSPSSHYSSPDAEPATARTSHRRSARYGELSGPPAQTGLTYYQQSLIGVARWPDPQYNQDHLPHQMEYGRSFFDASRHAGAGIASGQVQAFSQLWALAQRWRSEAAGGDYETFGEESERYPTYNHNPTTPLANQYAYILDRYRNREDGEFSEDVEGVPTHEFPLRDEINGKPITLSTVVVSADPDANRYDSRYSAIRHLEAGEPFYIRHTFSADVPEVLAHVEELYNQALDASVSDSQALSILGEIHWWVANAMPDHRGSAAKTEFSVRAIAMARGMELPPMRHGIVADLEAMTTSREAFVRHYNNFFDR	963	320
PbrICMP13684_AvrB2b_1	PbrICMP13684	AvrB	AvrB	AvrB	AvrB2	15	73	47	ATGGGATGTATATCATCGAAACCTCAGGTAATGTCTCCTTCCAGTCATTACTCTTCACCTGACGCGGAGCCTGCTACCGCTAGAACATCGCATCGTAGGTCAGCTCGTTATGGTGAATTATCGGGCCCTCCAGCACAAACCGGCTTAACGTATTATCAGCAATCGTTAATTGGCGTAGCTCGCTGGCCCGATCCTCAGTATAACCAGGACCATCTTCCTCATCAGATGGAATATGGTCGTTCCTTCTTCGATGCGTCTCGCCACGCAGGTGCTGGCATTGCTTCGGGTCAAGTTCAAGCATTTAGCCAATTGTGGGCCTTGGCACAGCGCTGGAGAAGCGAAGCTGCTGGCGGAGATTACGAAACTTTTGGCGAGGAAAGCGAGCGATACCCAACTTAC…	MGCISSKPQVMSPSSHYSSPDAEPATARTSHRRSARYGELSGPPAQTGLTYYQQSLIGVARWPDPQYNQDHLPHQMEYGRSFFDASRHAGAGIASGQVQAFSQLWALAQRWRSEAAGGDYETFGEESERYPTYNHNPTTPLANQYAYILDRYRNREDGEFSEDVEGVPTHEFPLRDEINGKPITLSTVVVSADPDANRYDSRYSAIRHLEAGEPFYIRHTFSADVPEVLAHVEELYNQALDASVSDSQALSILGEIHWWVANAMPDHRGSAAKTEFSVRAIAMARGMELPPMRHGIVADLEAMTTSREAFVRHYNNFFDR	963	320
PbrICMP13685_AvrB2b_1	PbrICMP13685	AvrB	AvrB	AvrB	AvrB2	15	73	47	ATGGGATGTATATCATCGAAACCTCAGGTAATGTCTCCTTCCAGTCATTACTCTTCACCTGACGCGGAGCCTGCTACCGCTAGAACATCGCATCGTAGGTCAGCTCGTTATGGTGAATTATCGGGCCCTCCAGCACAAACCGGCTTAACGTATTATCAGCAATCGTTAATTGGCGTAGCTCGCTGGCCCGATCCTCAGTATAACCAGGACCATCTTCCTCATCAGATGGAATATGGTCGTTCCTTCTTCGATGCGTCTCGCCACGCAGGTGCTGGCATTGCTTCGGGTCAAGTTCAAGCATTTAGCCAATTGTGGGCCTTGGCACAGCGCTGGAGAAGCGAAGCTGCTGGCGGAGATTACGAAACTTTTGGCGAGGAAAGCGAGCGATACCCAACTTAC…	MGCISSKPQVMSPSSHYSSPDAEPATARTSHRRSARYGELSGPPAQTGLTYYQQSLIGVARWPDPQYNQDHLPHQMEYGRSFFDASRHAGAGIASGQVQAFSQLWALAQRWRSEAAGGDYETFGEESERYPTYNHNPTTPLANQYAYILDRYRNREDGEFSEDVEGVPTHEFPLRDEINGKPITLSTVVVSADPDANRYDSRYSAIRHLEAGEPFYIRHTFSADVPEVLAHVEELYNQALDASVSDSQALSILGEIHWWVANAMPDHRGSAAKTEFSVRAIAMARGMELPPMRHGIVADLEAMTTSREAFVRHYNNFFDR	963	320
PmoICMP4331_AvrB2b_1	PmoICMP4331	AvrB	AvrB	AvrB	AvrB2	15	73	47	ATGGGATGTATATCATCGAAACCTCAGGTAATGTCTCCTTCCAGTCATTACTCTTCACCTGACGCGGAGCCTGCTACCGCTAGAACATCGCATCGTAGGTCAGCTCGTTATGGTGAATTATCGGGCCCTCCAGCACAAACCGGCTTAACGTATTATCAGCAATCGTTAATTGGCGTAGCTCGCTGGCCCGATCCTCAGTATAACCAGGACCATCTTCCTCATCAGATGGAATATGGTCGTTCCTTCTTCGATGCGTCTCGCCACGCAGGTGCTGGCATTGCTTCGGGTCAAGTTCAAGCATTTAGCCAATTGTGGGCCTTGGCACAGCGCTGGAGAAGCGAAGCTGCTGGCGGAGATTACGAAACTTTTGGCGAGGAAAGCGAGCGATACCCAACTTAC…	MGCISSKPQVMSPSSHYSSPDAEPATARTSHRRSARYGELSGPPAQTGLTYYQQSLIGVARWPDPQYNQDHLPHQMEYGRSFFDASRHAGAGIASGQVQAFSQLWALAQRWRSEAAGGDYETFGEESERYPTYNHNPTTPLANQYAYILDRYRNREDGEFSEDVEGVPTHEFPLRDEINGKPITLSTVVVSADPDANRYDSRYSAIRHLEAGEPFYIRHTFSADVPEVLAHVEELYNQALDASVSDSQALSILGEIHWWVANAMPDHRGSAAKTEFSVRAIAMARGMELPPMRHGIVADLEAMTTSREAFVRHYNNFFDR	963	320
PcbICMP2821_AvrB2b_1	PcbICMP2821	AvrB	AvrB	AvrB	AvrB2	15	73	48	ATGGGATGTATATCATCGAAACCTCAGGTAATGTCTCCTTCCAGTCATTACTCTTCACCTGACGCGGAGCCTGCTACCGCTAGAACATCGCATCGTAGGTCAGCTCGTTATGGTGAATTATCGGGCCCTCCAGCACAAACCGGCTTAACGTATTATCAGCAATCGTTAATTGGCGTAGCTCGCTGGCCCGATCCTCAGTATAACCAGGACCATCTTCCTCATCAGATGGAATATGGTCGTTCCTTCTTCGATGCGTCTCGCCACGCAGGTGCTGGCATTGCTTCGGGTCAAGTTCAAGCATTTAGCCAATTGTGGGCCTTGGCACAGCGCTGGAGAAGCGAAGCTGCTGGCGGAGATTACAAAACTTTTGGCGAGGAAAGCGAGCGATACCCAACTTAC…	MGCISSKPQVMSPSSHYSSPDAEPATARTSHRRSARYGELSGPPAQTGLTYYQQSLIGVARWPDPQYNQDHLPHQMEYGRSFFDASRHAGAGIASGQVQAFSQLWALAQRWRSEAAGGDYKTFGEESERYPTYNHNPTTPLANQYAYILDRYRNRKDGEFCEDVEGVPMHEFPLRDNINGKRITLSTVVVSADPDANRYDSRYSAIRHLEAGEPFYIRHTFSADVPEVLAHVEELYNQALDASVSDSQALSILGEIHWWVANAMPDHRGSAAKTEFSVRAIAMARGMELPPMRHGKVADLEAMTTSREAFVRDYNNFFDR	963	320
PcbICMP2823_AvrB2b_1	PcbICMP2823	AvrB	AvrB	AvrB	AvrB2	15	73	48	ATGGGATGTATATCATCGAAACCTCAGGTAATGTCTCCTTCCAGTCATTACTCTTCACCTGACGCGGAGCCTGCTACCGCTAGAACATCGCATCGTAGGTCAGCTCGTTATGGTGAATTATCGGGCCCTCCAGCACAAACCGGCTTAACGTATTATCAGCAATCGTTAATTGGCGTAGCTCGCTGGCCCGATCCTCAGTATAACCAGGACCATCTTCCTCATCAGATGGAATATGGTCGTTCCTTCTTCGATGCGTCTCGCCACGCAGGTGCTGGCATTGCTTCGGGTCAAGTTCAAGCATTTAGCCAATTGTGGGCCTTGGCACAGCGCTGGAGAAGCGAAGCTGCTGGCGGAGATTACAAAACTTTTGGCGAGGAAAGCGAGCGATACCCAACTTAC…	MGCISSKPQVMSPSSHYSSPDAEPATARTSHRRSARYGELSGPPAQTGLTYYQQSLIGVARWPDPQYNQDHLPHQMEYGRSFFDASRHAGAGIASGQVQAFSQLWALAQRWRSEAAGGDYKTFGEESERYPTYNHNPTTPLANQYAYILDRYRNRKDGEFCEDVEGVPMHEFPLRDNINGKRITLSTVVVSADPDANRYDSRYSAIRHLEAGEPFYIRHTFSADVPEVLAHVEELYNQALDASVSDSQALSILGEIHWWVANAMPDHRGSAAKTEFSVRAIAMARGMELPPMRHGKVADLEAMTTSREAFVRDYNNFFDR	963	320
PcuICMP11894_AvrB2b_1	PcuICMP11894	AvrB	AvrB	AvrB	AvrB2	15	73	49	ATGGGATGTATATCATCGAAACCTCAGGTAATGTCTCCTTCCCGTCATTACTCTTCACCTGACGCGGAGCCTGCTACCGCTAGAACATCGCATCGTAGGTCAGCTCGTTATGGTGAATTATCGGGCCCTCCAGCACAAACCGGCTTAACGTATTATCAGCAATCGTTAATTGGCGTAGCTCGCTGGCCCGATCCTCAGTATAACCAGGACCATCTTCCTCATCAGATGGAATATGGTCGTTCCTTCTTCGATGCGTCTCGCCACGCAGGTGCTGGCATTGCTTCGGGTCAAGTTCAAGCATTTAGCCAATTGTGGGCCTTGGCACAGCGCTGGAGAAGCGAAGCTGCTGGCGGAGATTACGAAACTTTTGGCGAGGAAAGTGAGCGATACCCAACTTAC…	MGCISSKPQVMSPSRHYSSPDAEPATARTSHRRSARYGELSGPPAQTGLTYYQQSLIGVARWPDPQYNQDHLPHQMEYGRSFFDASRHAGAGIASGQVQAFSQLWALAQRWRSEAAGGDYETFGEESERYPTYNHNPTTPLANQYAYILDRYRNREDGEFSEDVEGVPTHEFPLRDEINGKPITLSTVVVSADPDANRYDSRYSAIRHLEAGEPFYIRHTFSADVPEVLAHVEELYNQALDASVSDSQALSILGEIHWWVANAMPDHRGSAAKTEFSVRAIAMARGMELPPMRHGIVADLEAMTTSREAFVRHYNNFFDR	963	320
PcuICMP11895_AvrB2b_1	PcuICMP11895	AvrB	AvrB	AvrB	AvrB2	15	73	49	ATGGGATGTATATCATCGAAACCTCAGGTAATGTCTCCTTCCCGTCATTACTCTTCACCTGACGCGGAGCCTGCTACCGCTAGAACATCGCATCGTAGGTCAGCTCGTTATGGTGAATTATCGGGCCCTCCAGCACAAACCGGCTTAACGTATTATCAGCAATCGTTAATTGGCGTAGCTCGCTGGCCCGATCCTCAGTATAACCAGGACCATCTTCCTCATCAGATGGAATATGGTCGTTCCTTCTTCGATGCGTCTCGCCACGCAGGTGCTGGCATTGCTTCGGGTCAAGTTCAAGCATTTAGCCAATTGTGGGCCTTGGCACAGCGCTGGAGAAGCGAAGCTGCTGGCGGAGATTACGAAACTTTTGGCGAGGAAAGTGAGCGATACCCAACTTAC…	MGCISSKPQVMSPSRHYSSPDAEPATARTSHRRSARYGELSGPPAQTGLTYYQQSLIGVARWPDPQYNQDHLPHQMEYGRSFFDASRHAGAGIASGQVQAFSQLWALAQRWRSEAAGGDYETFGEESERYPTYNHNPTTPLANQYAYILDRYRNREDGEFSEDVEGVPTHEFPLRDEINGKPITLSTVVVSADPDANRYDSRYSAIRHLEAGEPFYIRHTFSADVPEVLAHVEELYNQALDASVSDSQALSILGEIHWWVANAMPDHRGSAAKTEFSVRAIAMARGMELPPMRHGIVADLEAMTTSREAFVRHYNNFFDR	963	320
PcuICMP11897_AvrB2b_1	PcuICMP11897	AvrB	AvrB	AvrB	AvrB2	15	73	49	ATGGGATGTATATCATCGAAACCTCAGGTAATGTCTCCTTCCCGTCATTACTCTTCACCTGACGCGGAGCCTGCTACCGCTAGAACATCGCATCGTAGGTCAGCTCGTTATGGTGAATTATCGGGCCCTCCAGCACAAACCGGCTTAACGTATTATCAGCAATCGTTAATTGGCGTAGCTCGCTGGCCCGATCCTCAGTATAACCAGGACCATCTTCCTCATCAGATGGAATATGGTCGTTCCTTCTTCGATGCGTCTCGCCACGCAGGTGCTGGCATTGCTTCGGGTCAAGTTCAAGCATTTAGCCAATTGTGGGCCTTGGCACAGCGCTGGAGAAGCGAAGCTGCTGGCGGAGATTACGAAACTTTTGGCGAGGAAAGTGAGCGATACCCAACTTAC…	MGCISSKPQVMSPSRHYSSPDAEPATARTSHRRSARYGELSGPPAQTGLTYYQQSLIGVARWPDPQYNQDHLPHQMEYGRSFFDASRHAGAGIASGQVQAFSQLWALAQRWRSEAAGGDYETFGEESERYPTYNHNPTTPLANQYAYILDRYRNREDGEFSEDVEGVPTHEFPLRDEINGKPITLSTVVVSADPDANRYDSRYSAIRHLEAGEPFYIRHTFSADVPEVLAHVEELYNQALDASVSDSQALSILGEIHWWVANAMPDHRGSAAKTEFSVRAIAMARGMELPPMRHGIVADLEAMTTSREAFVRHYNNFFDR	963	320
PcuICMP11899_AvrB2b_1	PcuICMP11899	AvrB	AvrB	AvrB	AvrB2	15	73	49	ATGGGATGTATATCATCGAAACCTCAGGTAATGTCTCCTTCCCGTCATTACTCTTCACCTGACGCGGAGCCTGCTACCGCTAGAACATCGCATCGTAGGTCAGCTCGTTATGGTGAATTATCGGGCCCTCCAGCACAAACCGGCTTAACGTATTATCAGCAATCGTTAATTGGCGTAGCTCGCTGGCCCGATCCTCAGTATAACCAGGACCATCTTCCTCATCAGATGGAATATGGTCGTTCCTTCTTCGATGCGTCTCGCCACGCAGGTGCTGGCATTGCTTCGGGTCAAGTTCAAGCATTTAGCCAATTGTGGGCCTTGGCACAGCGCTGGAGAAGCGAAGCTGCTGGCGGAGATTACGAAACTTTTGGCGAGGAAAGTGAGCGATACCCAACTTAC…	MGCISSKPQVMSPSRHYSSPDAEPATARTSHRRSARYGELSGPPAQTGLTYYQQSLIGVARWPDPQYNQDHLPHQMEYGRSFFDASRHAGAGIASGQVQAFSQLWALAQRWRSEAAGGDYETFGEESERYPTYNHNPTTPLANQYAYILDRYRNREDGEFSEDVEGVPTHEFPLRDEINGKPITLSTVVVSADPDANRYDSRYSAIRHLEAGEPFYIRHTFSADVPEVLAHVEELYNQALDASVSDSQALSILGEIHWWVANAMPDHRGSAAKTEFSVRAIAMARGMELPPMRHGIVADLEAMTTSREAFVRHYNNFFDR	963	320
PhoICMP7840_AvrB2b_1	PhoICMP7840	AvrB	AvrB	AvrB	AvrB2	15	73	50	ATGGGATGTATATCATCGAAACCTCAGGTAATGTCTCCTTCCCGTCATTACTCTTCACCTGACGCGGAGCCTGCTACCGCTAGAACATCGCATCGTAGGTCAGCTCGTTATGGTGAATTATCGGGCCCTCCAGCACAAACCGGCTTAACGTATTATCAGCAATCGTTAATTGGCGTAGCTCGCTGGCCCGATCCTCAGTATAACCAGGACCATCTTCCTCATCAGATGGAATATGGTCGTTCCTTCTTCGATGCGTCTCGCCACGCAGGTGCTGGCATTGCTTCGGGTCAAGTTCAAGCATTTAGCCAATTGTGGGCCTTGGCACAGCGCTGGAGAAGCGAAGCTGCTGGCGGAGACTACGAAACTTTTGGCGAGGAAAGCGAGCGATACCCAACTTAC…	MGCISSKPQVMSPSRHYSSPDAEPATARTSHRRSARYGELSGPPAQTGLTYYQQSLIGVARWPDPQYNQDHLPHQMEYGRSFFDASRHAGAGIASGQVQAFSQLWALAQRWRSEAAGGDYETFGEESERYPTYNHNPTTPLANQYAYILDRYRNREDGEFSEDVEGVPTHEFPLRDEINGKPITLSTVVVSADPDANRYDSRYSAIRHLEAGEPFYIRHTFSADVPEVLAHVEELYNQALDASVSDSQALSILGEIHWWVANAMPDHRGSAAKTEFSVRAIAMARGMELPPMRHGIVADLEAMTTSREAFVRHYNNFFDR	963	320
PhoICMP7847_AvrB2b_1	PhoICMP7847	AvrB	AvrB	AvrB	AvrB2	15	73	50	ATGGGATGTATATCATCGAAACCTCAGGTAATGTCTCCTTCCCGTCATTACTCTTCACCTGACGCGGAGCCTGCTACCGCTAGAACATCGCATCGTAGGTCAGCTCGTTATGGTGAATTATCGGGCCCTCCAGCACAAACCGGCTTAACGTATTATCAGCAATCGTTAATTGGCGTAGCTCGCTGGCCCGATCCTCAGTATAACCAGGACCATCTTCCTCATCAGATGGAATATGGTCGTTCCTTCTTCGATGCGTCTCGCCACGCAGGTGCTGGCATTGCTTCGGGTCAAGTTCAAGCATTTAGCCAATTGTGGGCCTTGGCACAGCGCTGGAGAAGCGAAGCTGCTGGCGGAGACTACGAAACTTTTGGCGAGGAAAGCGAGCGATACCCAACTTAC…	MGCISSKPQVMSPSRHYSSPDAEPATARTSHRRSARYGELSGPPAQTGLTYYQQSLIGVARWPDPQYNQDHLPHQMEYGRSFFDASRHAGAGIASGQVQAFSQLWALAQRWRSEAAGGDYETFGEESERYPTYNHNPTTPLANQYAYILDRYRNREDGEFSEDVEGVPTHEFPLRDEINGKPITLSTVVVSADPDANRYDSRYSAIRHLEAGEPFYIRHTFSADVPEVLAHVEELYNQALDASVSDSQALSILGEIHWWVANAMPDHRGSAAKTEFSVRAIAMARGMELPPMRHGIVADLEAMTTSREAFVRHYNNFFDR	963	320
Pmo301020_AvrB2b_1	Pmo301020	AvrB	AvrB	AvrB	AvrB2	15	73	51	ATGGGATGTATATCATCGAAACCTCAGGTAATGTCTCCTTCCAGTCATTACTCTTCACCTGACGCGGAGCCTGCTACCGCTAGAACATCGCATCGTAGGTCAGCTCGTTATGGTGAATTATCGGGCCCTCCAGCACAAACCGGCTTAACGTATTATCAGCAATCGTTAATTGGCGTAGCTCGCTGGCCCGATCCTCAGTATAACCAGGACCATCTTCCTCATCAGATGGAATATGGTCGTTCCTTCTTCGATGCGTCTCGCCACGCAGGTGCTGGCATTGCTTCGGGTCAAGTTCAAGCATTTAGCCAATTGTGGGCCTTGGCACAGCGCTGGAGAAGCGAAGCTGCTGGCGGAGATTACGAAACTTTTGGCGAGGAAAGCGAGCGATACCCAACTTAC…	MGCISSKPQVMSPSSHYSSPDAEPATARTSHRRSARYGELSGPPAQTGLTYYQQSLIGVARWPDPQYNQDHLPHQMEYGRSFFDASRHAGAGIASGQVQAFSQLWALAQRWRSEAAGGDYETFGEESERYPTYNHNPTTPLANQYAYILDRYRNREDGEFSEDVEGVPTHEFPLRDEINGKPITLSTVVVSADPDANRYDSRYSAIRHLEAGEPFYIRHTFSADVPEVLAHVEELYNQALDASVSDSQALSILGEIHWWVANAMPDHRGSAAKTEFSVRAIAMARGMELPPMRHGIVADLEAMTTSREAFVRHYNNFFDR	963	320
PmoICMP4468_AvrB2b_1	PmoICMP4468	AvrB	AvrB	AvrB	AvrB2	15	73	52	ATGGGATGTATATCATCGAAACCTCAGGTAATGTCTCCTTCCAGTCATTACTCTTCACCTGACGCGGAGCCTGCTACCGCTAGAACATCGCATCGTAGGTCAGCTCGTTATGGTGAATTATCGGGCCCTCCAGCACAAACCGGCTTAACGTATTATCAGCAATCGTTAATTGGCGTAGCTCGCTGGCCCGATCCTCAGTATAACCAGGACCATCTTCCTCATCAGATGGAATATGGTCGTTCCTTCTTCGATGCGTCTCGCCACGCAGGTGCTGGCATTGCTTCGGGTCAAGTTCAAGCATTTAGCCAATTGTGGGCCTTGGCACAGCGCTGGAGAAGCGAAGCTGCTGGCGGAGATTACGAAACTTTTGGCGAGGAAAGCGAGCGATACCCAACTTAC…	MGCISSKPQVMSPSSHYSSPDAEPATARTSHRRSARYGELSGPPAQTGLTYYQQSLIGVARWPDPQYNQDHLPHQMEYGRSFFDASRHAGAGIASGQVQAFSQLWALAQRWRSEAAGGDYETFGEESERYPTYNHNPTTPLANQYAYILDRYRNREDGEFSEDVEGVPTHEFPLRDEINGKPITLSTVVVSADPDANRYDSRYSAIRHLEAGEPFYIRHTFSADVPEVLAHVEELYNQALDASISDSQALSILGEIHWWVANAMPDHRGSAAKTEFSVRAIAMARGMELPPMRHGIVADLEAMTTSREAFVRHYNNFFDR	963	320
PmoICMP535_AvrB2b_1	PmoICMP535	AvrB	AvrB	AvrB	AvrB2	15	73	52	ATGGGATGTATATCATCGAAACCTCAGGTAATGTCTCCTTCCAGTCATTACTCTTCACCTGACGCGGAGCCTGCTACCGCTAGAACATCGCATCGTAGGTCAGCTCGTTATGGTGAATTATCGGGCCCTCCAGCACAAACCGGCTTAACGTATTATCAGCAATCGTTAATTGGCGTAGCTCGCTGGCCCGATCCTCAGTATAACCAGGACCATCTTCCTCATCAGATGGAATATGGTCGTTCCTTCTTCGATGCGTCTCGCCACGCAGGTGCTGGCATTGCTTCGGGTCAAGTTCAAGCATTTAGCCAATTGTGGGCCTTGGCACAGCGCTGGAGAAGCGAAGCTGCTGGCGGAGATTACGAAACTTTTGGCGAGGAAAGCGAGCGATACCCAACTTAC…	MGCISSKPQVMSPSSHYSSPDAEPATARTSHRRSARYGELSGPPAQTGLTYYQQSLIGVARWPDPQYNQDHLPHQMEYGRSFFDASRHAGAGIASGQVQAFSQLWALAQRWRSEAAGGDYETFGEESERYPTYNHNPTTPLANQYAYILDRYRNREDGEFSEDVEGVPTHEFPLRDEINGKPITLSTVVVSADPDANRYDSRYSAIRHLEAGEPFYIRHTFSADVPEVLAHVEELYNQALDASISDSQALSILGEIHWWVANAMPDHRGSAAKTEFSVRAIAMARGMELPPMRHGIVADLEAMTTSREAFVRHYNNFFDR	963	320
PmoICMP6941_AvrB2b_1	PmoICMP6941	AvrB	AvrB	AvrB	AvrB2	15	73	52	ATGGGATGTATATCATCGAAACCTCAGGTAATGTCTCCTTCCAGTCATTACTCTTCACCTGACGCGGAGCCTGCTACCGCTAGAACATCGCATCGTAGGTCAGCTCGTTATGGTGAATTATCGGGCCCTCCAGCACAAACCGGCTTAACGTATTATCAGCAATCGTTAATTGGCGTAGCTCGCTGGCCCGATCCTCAGTATAACCAGGACCATCTTCCTCATCAGATGGAATATGGTCGTTCCTTCTTCGATGCGTCTCGCCACGCAGGTGCTGGCATTGCTTCGGGTCAAGTTCAAGCATTTAGCCAATTGTGGGCCTTGGCACAGCGCTGGAGAAGCGAAGCTGCTGGCGGAGATTACGAAACTTTTGGCGAGGAAAGCGAGCGATACCCAACTTAC…	MGCISSKPQVMSPSSHYSSPDAEPATARTSHRRSARYGELSGPPAQTGLTYYQQSLIGVARWPDPQYNQDHLPHQMEYGRSFFDASRHAGAGIASGQVQAFSQLWALAQRWRSEAAGGDYETFGEESERYPTYNHNPTTPLANQYAYILDRYRNREDGEFSEDVEGVPTHEFPLRDEINGKPITLSTVVVSADPDANRYDSRYSAIRHLEAGEPFYIRHTFSADVPEVLAHVEELYNQALDASISDSQALSILGEIHWWVANAMPDHRGSAAKTEFSVRAIAMARGMELPPMRHGIVADLEAMTTSREAFVRHYNNFFDR	963	320
PmyICMP11123_AvrB2b_1	PmyICMP11123	AvrB	AvrB	AvrB	AvrB2	15	73	53	ATGGGATGTATATCATCGAAATCTCAGGTAATGTCTCCTTCCCGTCATTACTCTTCACCTGACGCGGAGCCTGCTACCGCTAGAACATCGCATCGTAGGTCAGCTCGTTATGGTGAATTATCGGGCCCTCCAGCACAAACCGGCTTAACGTATTATCAGCAATCGTTAATTGGCGTAGCTCGCTGGCCCGATCCTCAGTATAACCAGGACCATCTTCCTCATCAGATGGAATATGGTCGTTCCTTCTTCGATGCGTCTCGCCACGCAGGTGCTGGCATTGCTTCGGGTCAAGTTCAAGCATTTAGCCAATTGTGGGCCTTGGCACAGCGCTGGAGAAGCGAAGCTGCTGGCGGAGATTACGAAACTTTTGGCGAGGAAAGCGAGCGATACCCAACTTAC…	MGCISSKSQVMSPSRHYSSPDAEPATARTSHRRSARYGELSGPPAQTGLTYYQQSLIGVARWPDPQYNQDHLPHQMEYGRSFFDASRHAGAGIASGQVQAFSQLWALAQRWRSEAAGGDYETFGEESERYPTYNHNPTTPLANQYAYILDRYRNREDGEFSEDVEGVPTHEFPLRDEINGKPITLSTVVVSADPDANRYDSRYSAIRHLEAGEPFYIRHTFSADVPEVLAHVEELYNQALDASVSDSQALSILGKV	771	256
PmyICMP11510_AvrB2b_1	PmyICMP11510	AvrB	AvrB	AvrB	AvrB2	15	73	53	ATGGGATGTATATCATCGAAATCTCAGGTAATGTCTCCTTCCCGTCATTACTCTTCACCTGACGCGGAGCCTGCTACCGCTAGAACATCGCATCGTAGGTCAGCTCGTTATGGTGAATTATCGGGCCCTCCAGCACAAACCGGCTTAACGTATTATCAGCAATCGTTAATTGGCGTAGCTCGCTGGCCCGATCCTCAGTATAACCAGGACCATCTTCCTCATCAGATGGAATATGGTCGTTCCTTCTTCGATGCGTCTCGCCACGCAGGTGCTGGCATTGCTTCGGGTCAAGTTCAAGCATTTAGCCAATTGTGGGCCTTGGCACAGCGCTGGAGAAGCGAAGCTGCTGGCGGAGATTACGAAACTTTTGGCGAGGAAAGCGAGCGATACCCAACTTAC…	MGCISSKSQVMSPSRHYSSPDAEPATARTSHRRSARYGELSGPPAQTGLTYYQQSLIGVARWPDPQYNQDHLPHQMEYGRSFFDASRHAGAGIASGQVQAFSQLWALAQRWRSEAAGGDYETFGEESERYPTYNHNPTTPLANQYAYILDRYRNREDGEFSEDVEGVPTHEFPLRDEINGKPITLSTVVVSADPDANRYDSRYSAIRHLEAGEPFYIRHTFSADVPEVLAHVEELYNQALDASVSDSQALSILGKV	771	256
PrhICMP9756_AvrB2b_1	PrhICMP9756	AvrB	AvrB	AvrB	AvrB2	15	73	54	ATGGGATGTATATCATCGAAACCTCAGGTAATGTCTCCTTCCCGTCATTACTCTTCACCTGACGCGGAGCCTGCTACCGCTAGAACATCGCATCGTAGGTCAGCTCGTTATGGTGAATTATCGGGCCCTCCAGCACAAACCGGCTTAACGTATTATCAGCAATCGTTAATTGGCGTAGCTCGCTGGCCCGATCCTCAGTATAACCAGGACCATCTTCCTCATCAGATGGAATATGGTCGTTCCTTCTTCGATGCGTCTCGCCACGCAGGTGCTGGCATTGCTTCGGGTCAAGTTCAAGCATTTAGCCAATTGTGGGCCTTGGCACAGCGCTGGAGAAGCGAAGCTGCTGGCGGAGATTACGAAACTTTTGGCGAGGAAAGTGAGCGATACCCAACTTAC…	MGCISSKPQVMSPSRHYSSPDAEPATARTSHRRSARYGELSGPPAQTGLTYYQQSLIGVARWPDPQYNQDHLPHQMEYGRSFFDASRHAGAGIASGQVQAFSQLWALAQRWRSEAAGGDYETFGEESERYPTYNHNPTTPLANQYAYILDRYRNREDGEFSEDVEGVPTHEFPLRDEINDKPITLSTVVVSADPDANRYDSRYSAIRHLEAGEPFYIRHTFSADVPEVLAHVEELYNQALDASVSDSQALSILGEIHWWVANAMPDHRGSAAKTEFSVRAIAMARGMELPPMRHGIVADLEAMTTSREAFVRHYNNFFDR	963	320
Psa302091_AvrB2b_1	Psa302091	AvrB	AvrB	AvrB	AvrB2	15	73	55	ATGGGATGTATATCATCGAAACCTCAGGTAATGTCTCCTTCCCGTCATTACTCTTCACCTGACGCGGAGCCTGCTACCGCTAGAACATCGCATCGTAGGTCAGCTCGTTATGGTGAATTATCGGGCCCTCCAGCACAAACCGGCTTAACGTATTATCAGCAATCGTTAATTGGCGTAGCTCGCTGGCCCGATCCTCAGTATAACCAGGACCATCTTCCTCATCAGATGGAATATGGTCGTTCCTTCTTCGATGCGTCTCGCCACGCAGGTGCTGGCATTGCTTCGGGTCAAGTTCAAGCATTTAGCCAATTGTGGGCCTTGGCACAGCGCTGGAGAAGCGAAGCTGCTGGCGGAGATTACGAAACTTTTGGCGAGGAAAGCGAGCGATACCCAACTTAC…	MGCISSKPQVMSPSRHYSSPDAEPATARTSHRRSARYGELSGPPAQTGLTYYQQSLIGVARWPDPQYNQDHLPHQMEYGRSFFDASRHAGAGIASGQVQAFSQLWALAQRWRSEAAGGDYETFGEESERYPTYNHNPTTPLANQYAYILDRYRNREDGEFSEDVEGVPTHEFPLRDEINGKPITLSTVVVSADPDANRYDSRYSAIRHLEAGEPFYIRHTFSADVPEVLAHVEELYNQALDASVSDSQALSILGEIHWWVANAMPDHRGSAAKTEFSVRAIAMARGMELPPMRHGIVADLEAMTTSREAFVRHYNNFFDR	963	320
PsaICMP19068_AvrB2b_1	PsaICMP19068	AvrB	AvrB	AvrB	AvrB2	15	73	55	ATGGGATGTATATCATCGAAACCTCAGGTAATGTCTCCTTCCCGTCATTACTCTTCACCTGACGCGGAGCCTGCTACCGCTAGAACATCGCATCGTAGGTCAGCTCGTTATGGTGAATTATCGGGCCCTCCAGCACAAACCGGCTTAACGTATTATCAGCAATCGTTAATTGGCGTAGCTCGCTGGCCCGATCCTCAGTATAACCAGGACCATCTTCCTCATCAGATGGAATATGGTCGTTCCTTCTTCGATGCGTCTCGCCACGCAGGTGCTGGCATTGCTTCGGGTCAAGTTCAAGCATTTAGCCAATTGTGGGCCTTGGCACAGCGCTGGAGAAGCGAAGCTGCTGGCGGAGATTACGAAACTTTTGGCGAGGAAAGCGAGCGATACCCAACTTAC…	MGCISSKPQVMSPSRHYSSPDAEPATARTSHRRSARYGELSGPPAQTGLTYYQQSLIGVARWPDPQYNQDHLPHQMEYGRSFFDASRHAGAGIASGQVQAFSQLWALAQRWRSEAAGGDYETFGEESERYPTYNHNPTTPLANQYAYILDRYRNREDGEFSEDVEGVPTHEFPLRDEINGKPITLSTVVVSADPDANRYDSRYSAIRHLEAGEPFYIRHTFSADVPEVLAHVEELYNQALDASVSDSQALSILGEIHWWVANAMPDHRGSAAKTEFSVRAIAMARGMELPPMRHGIVADLEAMTTSREAFVRHYNNFFDR	963	320
PsaICMP19070_AvrB2b_1	PsaICMP19070	AvrB	AvrB	AvrB	AvrB2	15	73	55	ATGGGATGTATATCATCGAAACCTCAGGTAATGTCTCCTTCCCGTCATTACTCTTCACCTGACGCGGAGCCTGCTACCGCTAGAACATCGCATCGTAGGTCAGCTCGTTATGGTGAATTATCGGGCCCTCCAGCACAAACCGGCTTAACGTATTATCAGCAATCGTTAATTGGCGTAGCTCGCTGGCCCGATCCTCAGTATAACCAGGACCATCTTCCTCATCAGATGGAATATGGTCGTTCCTTCTTCGATGCGTCTCGCCACGCAGGTGCTGGCATTGCTTCGGGTCAAGTTCAAGCATTTAGCCAATTGTGGGCCTTGGCACAGCGCTGGAGAAGCGAAGCTGCTGGCGGAGATTACGAAACTTTTGGCGAGGAAAGCGAGCGATACCCAACTTAC…	MGCISSKPQVMSPSRHYSSPDAEPATARTSHRRSARYGELSGPPAQTGLTYYQQSLIGVARWPDPQYNQDHLPHQMEYGRSFFDASRHAGAGIASGQVQAFSQLWALAQRWRSEAAGGDYETFGEESERYPTYNHNPTTPLANQYAYILDRYRNREDGEFSEDVEGVPTHEFPLRDEINGKPITLSTVVVSADPDANRYDSRYSAIRHLEAGEPFYIRHTFSADVPEVLAHVEELYNQALDASVSDSQALSILGEIHWWVANAMPDHRGSAAKTEFSVRAIAMARGMELPPMRHGIVADLEAMTTSREAFVRHYNNFFDR	963	320
PsaICMP19102_AvrB2b_1	PsaICMP19102	AvrB	AvrB	AvrB	AvrB2	15	73	55	ATGGGATGTATATCATCGAAACCTCAGGTAATGTCTCCTTCCCGTCATTACTCTTCACCTGACGCGGAGCCTGCTACCGCTAGAACATCGCATCGTAGGTCAGCTCGTTATGGTGAATTATCGGGCCCTCCAGCACAAACCGGCTTAACGTATTATCAGCAATCGTTAATTGGCGTAGCTCGCTGGCCCGATCCTCAGTATAACCAGGACCATCTTCCTCATCAGATGGAATATGGTCGTTCCTTCTTCGATGCGTCTCGCCACGCAGGTGCTGGCATTGCTTCGGGTCAAGTTCAAGCATTTAGCCAATTGTGGGCCTTGGCACAGCGCTGGAGAAGCGAAGCTGCTGGCGGAGATTACGAAACTTTTGGCGAGGAAAGCGAGCGATACCCAACTTAC…	MGCISSKPQVMSPSRHYSSPDAEPATARTSHRRSARYGELSGPPAQTGLTYYQQSLIGVARWPDPQYNQDHLPHQMEYGRSFFDASRHAGAGIASGQVQAFSQLWALAQRWRSEAAGGDYETFGEESERYPTYNHNPTTPLANQYAYILDRYRNREDGEFSEDVEGVPTHEFPLRDEINGKPITLSTVVVSADPDANRYDSRYSAIRHLEAGEPFYIRHTFSADVPEVLAHVEELYNQALDASVSDSQALSILGEIHWWVANAMPDHRGSAAKTEFSVRAIAMARGMELPPMRHGIVADLEAMTTSREAFVRHYNNFFDR	963	320
PsaICMP19103_AvrB2b_1	PsaICMP19103	AvrB	AvrB	AvrB	AvrB2	15	73	55	ATGGGATGTATATCATCGAAACCTCAGGTAATGTCTCCTTCCCGTCATTACTCTTCACCTGACGCGGAGCCTGCTACCGCTAGAACATCGCATCGTAGGTCAGCTCGTTATGGTGAATTATCGGGCCCTCCAGCACAAACCGGCTTAACGTATTATCAGCAATCGTTAATTGGCGTAGCTCGCTGGCCCGATCCTCAGTATAACCAGGACCATCTTCCTCATCAGATGGAATATGGTCGTTCCTTCTTCGATGCGTCTCGCCACGCAGGTGCTGGCATTGCTTCGGGTCAAGTTCAAGCATTTAGCCAATTGTGGGCCTTGGCACAGCGCTGGAGAAGCGAAGCTGCTGGCGGAGATTACGAAACTTTTGGCGAGGAAAGCGAGCGATACCCAACTTAC…	MGCISSKPQVMSPSRHYSSPDAEPATARTSHRRSARYGELSGPPAQTGLTYYQQSLIGVARWPDPQYNQDHLPHQMEYGRSFFDASRHAGAGIASGQVQAFSQLWALAQRWRSEAAGGDYETFGEESERYPTYNHNPTTPLANQYAYILDRYRNREDGEFSEDVEGVPTHEFPLRDEINGKPITLSTVVVSADPDANRYDSRYSAIRHLEAGEPFYIRHTFSADVPEVLAHVEELYNQALDASVSDSQALSILGEIHWWVANAMPDHRGSAAKTEFSVRAIAMARGMELPPMRHGIVADLEAMTTSREAFVRHYNNFFDR	963	320
PsaICMP19104_AvrB2b_1	PsaICMP19104	AvrB	AvrB	AvrB	AvrB2	15	73	55	ATGGGATGTATATCATCGAAACCTCAGGTAATGTCTCCTTCCCGTCATTACTCTTCACCTGACGCGGAGCCTGCTACCGCTAGAACATCGCATCGTAGGTCAGCTCGTTATGGTGAATTATCGGGCCCTCCAGCACAAACCGGCTTAACGTATTATCAGCAATCGTTAATTGGCGTAGCTCGCTGGCCCGATCCTCAGTATAACCAGGACCATCTTCCTCATCAGATGGAATATGGTCGTTCCTTCTTCGATGCGTCTCGCCACGCAGGTGCTGGCATTGCTTCGGGTCAAGTTCAAGCATTTAGCCAATTGTGGGCCTTGGCACAGCGCTGGAGAAGCGAAGCTGCTGGCGGAGATTACGAAACTTTTGGCGAGGAAAGCGAGCGATACCCAACTTAC…	MGCISSKPQVMSPSRHYSSPDAEPATARTSHRRSARYGELSGPPAQTGLTYYQQSLIGVARWPDPQYNQDHLPHQMEYGRSFFDASRHAGAGIASGQVQAFSQLWALAQRWRSEAAGGDYETFGEESERYPTYNHNPTTPLANQYAYILDRYRNREDGEFSEDVEGVPTHEFPLRDEINGKPITLSTVVVSADPDANRYDSRYSAIRHLEAGEPFYIRHTFSADVPEVLAHVEELYNQALDASVSDSQALSILGEIHWWVANAMPDHRGSAAKTEFSVRAIAMARGMELPPMRHGIVADLEAMTTSREAFVRHYNNFFDR	963	320
PsaICMP9617_AvrB2b_1	PsaICMP9617	AvrB	AvrB	AvrB	AvrB2	15	73	55	ATGGGATGTATATCATCGAAACCTCAGGTAATGTCTCCTTCCCGTCATTACTCTTCACCTGACGCGGAGCCTGCTACCGCTAGAACATCGCATCGTAGGTCAGCTCGTTATGGTGAATTATCGGGCCCTCCAGCACAAACCGGCTTAACGTATTATCAGCAATCGTTAATTGGCGTAGCTCGCTGGCCCGATCCTCAGTATAACCAGGACCATCTTCCTCATCAGATGGAATATGGTCGTTCCTTCTTCGATGCGTCTCGCCACGCAGGTGCTGGCATTGCTTCGGGTCAAGTTCAAGCATTTAGCCAATTGTGGGCCTTGGCACAGCGCTGGAGAAGCGAAGCTGCTGGCGGAGATTACGAAACTTTTGGCGAGGAAAGCGAGCGATACCCAACTTAC…	MGCISSKPQVMSPSRHYSSPDAEPATARTSHRRSARYGELSGPPAQTGLTYYQQSLIGVARWPDPQYNQDHLPHQMEYGRSFFDASRHAGAGIASGQVQAFSQLWALAQRWRSEAAGGDYETFGEESERYPTYNHNPTTPLANQYAYILDRYRNREDGEFSEDVEGVPTHEFPLRDEINGKPITLSTVVVSADPDANRYDSRYSAIRHLEAGEPFYIRHTFSADVPEVLAHVEELYNQALDASVSDSQALSILGEIHWWVANAMPDHRGSAAKTEFSVRAIAMARGMELPPMRHGIVADLEAMTTSREAFVRHYNNFFDR	963	320
PsaICMP9853_AvrB2b_1	PsaICMP9853	AvrB	AvrB	AvrB	AvrB2	15	73	55	ATGGGATGTATATCATCGAAACCTCAGGTAATGTCTCCTTCCCGTCATTACTCTTCACCTGACGCGGAGCCTGCTACCGCTAGAACATCGCATCGTAGGTCAGCTCGTTATGGTGAATTATCGGGCCCTCCAGCACAAACCGGCTTAACGTATTATCAGCAATCGTTAATTGGCGTAGCTCGCTGGCCCGATCCTCAGTATAACCAGGACCATCTTCCTCATCAGATGGAATATGGTCGTTCCTTCTTCGATGCGTCTCGCCACGCAGGTGCTGGCATTGCTTCGGGTCAAGTTCAAGCATTTAGCCAATTGTGGGCCTTGGCACAGCGCTGGAGAAGCGAAGCTGCTGGCGGAGATTACGAAACTTTTGGCGAGGAAAGCGAGCGATACCCAACTTAC…	MGCISSKPQVMSPSRHYSSPDAEPATARTSHRRSARYGELSGPPAQTGLTYYQQSLIGVARWPDPQYNQDHLPHQMEYGRSFFDASRHAGAGIASGQVQAFSQLWALAQRWRSEAAGGDYETFGEESERYPTYNHNPTTPLANQYAYILDRYRNREDGEFSEDVEGVPTHEFPLRDEINGKPITLSTVVVSADPDANRYDSRYSAIRHLEAGEPFYIRHTFSADVPEVLAHVEELYNQALDASVSDSQALSILGEIHWWVANAMPDHRGSAAKTEFSVRAIAMARGMELPPMRHGIVADLEAMTTSREAFVRHYNNFFDR	963	320
PsaNCPPB3739_AvrB2b_1	PsaNCPPB3739	AvrB	AvrB	AvrB	AvrB2	15	73	55	ATGGGATGTATATCATCGAAACCTCAGGTAATGTCTCCTTCCCGTCATTACTCTTCACCTGACGCGGAGCCTGCTACCGCTAGAACATCGCATCGTAGGTCAGCTCGTTATGGTGAATTATCGGGCCCTCCAGCACAAACCGGCTTAACGTATTATCAGCAATCGTTAATTGGCGTAGCTCGCTGGCCCGATCCTCAGTATAACCAGGACCATCTTCCTCATCAGATGGAATATGGTCGTTCCTTCTTCGATGCGTCTCGCCACGCAGGTGCTGGCATTGCTTCGGGTCAAGTTCAAGCATTTAGCCAATTGTGGGCCTTGGCACAGCGCTGGAGAAGCGAAGCTGCTGGCGGAGATTACGAAACTTTTGGCGAGGAAAGCGAGCGATACCCAACTTAC…	MGCISSKPQVMSPSRHYSSPDAEPATARTSHRRSARYGELSGPPAQTGLTYYQQSLIGVARWPDPQYNQDHLPHQMEYGRSFFDASRHAGAGIASGQVQAFSQLWALAQRWRSEAAGGDYETFGEESERYPTYNHNPTTPLANQYAYILDRYRNREDGEFSEDVEGVPTHEFPLRDEINGKPITLSTVVVSADPDANRYDSRYSAIRHLEAGEPFYIRHTFSADVPEVLAHVEELYNQALDASVSDSQALSILGEIHWWVANAMPDHRGSAAKTEFSVRAIAMARGMELPPMRHGIVADLEAMTTSREAFVRHYNNFFDR	963	320
PsaNCPPB3871_AvrB2b_1	PsaNCPPB3871	AvrB	AvrB	AvrB	AvrB2	15	73	55	ATGGGATGTATATCATCGAAACCTCAGGTAATGTCTCCTTCCCGTCATTACTCTTCACCTGACGCGGAGCCTGCTACCGCTAGAACATCGCATCGTAGGTCAGCTCGTTATGGTGAATTATCGGGCCCTCCAGCACAAACCGGCTTAACGTATTATCAGCAATCGTTAATTGGCGTAGCTCGCTGGCCCGATCCTCAGTATAACCAGGACCATCTTCCTCATCAGATGGAATATGGTCGTTCCTTCTTCGATGCGTCTCGCCACGCAGGTGCTGGCATTGCTTCGGGTCAAGTTCAAGCATTTAGCCAATTGTGGGCCTTGGCACAGCGCTGGAGAAGCGAAGCTGCTGGCGGAGATTACGAAACTTTTGGCGAGGAAAGCGAGCGATACCCAACTTAC…	MGCISSKPQVMSPSRHYSSPDAEPATARTSHRRSARYGELSGPPAQTGLTYYQQSLIGVARWPDPQYNQDHLPHQMEYGRSFFDASRHAGAGIASGQVQAFSQLWALAQRWRSEAAGGDYETFGEESERYPTYNHNPTTPLANQYAYILDRYRNREDGEFSEDVEGVPTHEFPLRDEINGKPITLSTVVVSADPDANRYDSRYSAIRHLEAGEPFYIRHTFSADVPEVLAHVEELYNQALDASVSDSQALSILGEIHWWVANAMPDHRGSAAKTEFSVRAIAMARGMELPPMRHGIVADLEAMTTSREAFVRHYNNFFDR	963	320
PsaPA459_AvrB2b_1	PsaPA459	AvrB	AvrB	AvrB	AvrB2	15	73	55	ATGGGATGTATATCATCGAAACCTCAGGTAATGTCTCCTTCCCGTCATTACTCTTCACCTGACGCGGAGCCTGCTACCGCTAGAACATCGCATCGTAGGTCAGCTCGTTATGGTGAATTATCGGGCCCTCCAGCACAAACCGGCTTAACGTATTATCAGCAATCGTTAATTGGCGTAGCTCGCTGGCCCGATCCTCAGTATAACCAGGACCATCTTCCTCATCAGATGGAATATGGTCGTTCCTTCTTCGATGCGTCTCGCCACGCAGGTGCTGGCATTGCTTCGGGTCAAGTTCAAGCATTTAGCCAATTGTGGGCCTTGGCACAGCGCTGGAGAAGCGAAGCTGCTGGCGGAGATTACGAAACTTTTGGCGAGGAAAGCGAGCGATACCCAACTTAC…	MGCISSKPQVMSPSRHYSSPDAEPATARTSHRRSARYGELSGPPAQTGLTYYQQSLIGVARWPDPQYNQDHLPHQMEYGRSFFDASRHAGAGIASGQVQAFSQLWALAQRWRSEAAGGDYETFGEESERYPTYNHNPTTPLANQYAYILDRYRNREDGEFSEDVEGVPTHEFPLRDEINGKPITLSTVVVSADPDANRYDSRYSAIRHLEAGEPFYIRHTFSADVPEVLAHVEELYNQALDASVSDSQALSILGEIHWWVANAMPDHRGSAAKTEFSVRAIAMARGMELPPMRHGIVADLEAMTTSREAFVRHYNNFFDR	963	320
PsaICMP19071_AvrB2b_1	PsaICMP19071	AvrB	AvrB	AvrB	AvrB2	15	73	56	ATGGGATGTATATCATCGAAACCTCAGGTAATGTCTCCTTCCCGTCATTACTCTTCACCTGACGCGGAGCCTGCTACCGCTAGAACATCGCATCGTAGGTCAGCTCGTTATGGTGAATTATCGGGCCCTCCAGCACAAACCGGCTTAACGTATTATCAGCAATCGTTAATTGGCGTAGCTCGCTGGCCCGATCCTCAGTATAACCAGGACCATCTTCCTCATCAGATGGAATATGGTCGTTCCTTCTTCGATGCGTCTCGCCACGCAGGTGCTGGCATTGCTTCGGGTCAAGTTCAAGCATTTAGCCAATTGTGGGCCTTGGCACAGCGCTGGAGAAGCGAAGCTGCTGGCGGAGATTACGAAACTTTTGGCGAGGAAAGCGAGCGATACCCAACTTAC…	MGCISSKPQVMSPSRHYSSPDAEPATARTSHRRSARYGELSGPPAQTGLTYYQQSLIGVARWPDPQYNQDHLPHQMEYGRSFFDASRHAGAGIASGQVQAFSQLWALAQRWRSEAAGGDYETFGEESERYPTYNHNPTTPLANQYAYILDRYRNREDGEFSEDVEGVPTHEFPLRDEINGKPITLSTVVVSADPDANRYDSRYSAIRHLEAGEPFYIRHTFSADVPEVLAHVEELYNQALDASVSDSQALSILGEIHWWVANAMPDHRGSAAKTEFSVRAIAMARGMELPPMRHGIVADLEAMTTSREAFVRHYNNFFDR	963	320
PsaICMP19072_AvrB2b_1	PsaICMP19072	AvrB	AvrB	AvrB	AvrB2	15	73	56	ATGGGATGTATATCATCGAAACCTCAGGTAATGTCTCCTTCCCGTCATTACTCTTCACCTGACGCGGAGCCTGCTACCGCTAGAACATCGCATCGTAGGTCAGCTCGTTATGGTGAATTATCGGGCCCTCCAGCACAAACCGGCTTAACGTATTATCAGCAATCGTTAATTGGCGTAGCTCGCTGGCCCGATCCTCAGTATAACCAGGACCATCTTCCTCATCAGATGGAATATGGTCGTTCCTTCTTCGATGCGTCTCGCCACGCAGGTGCTGGCATTGCTTCGGGTCAAGTTCAAGCATTTAGCCAATTGTGGGCCTTGGCACAGCGCTGGAGAAGCGAAGCTGCTGGCGGAGATTACGAAACTTTTGGCGAGGAAAGCGAGCGATACCCAACTTAC…	MGCISSKPQVMSPSRHYSSPDAEPATARTSHRRSARYGELSGPPAQTGLTYYQQSLIGVARWPDPQYNQDHLPHQMEYGRSFFDASRHAGAGIASGQVQAFSQLWALAQRWRSEAAGGDYETFGEESERYPTYNHNPTTPLANQYAYILDRYRNREDGEFSEDVEGVPTHEFPLRDEINGKPITLSTVVVSADPDANRYDSRYSAIRHLEAGEPFYIRHTFSADVPEVLAHVEELYNQALDASVSDSQALSILGEIHWWVANAMPDHRGSAAKTEFSVRAIAMARGMELPPMRHGIVADLEAMTTSREAFVRHYNNFFDR	963	320
Psy0533_AvrB2c_1	Psy0533	AvrB	AvrB	AvrB	AvrB2	15	73	57	ATGGGAAATGTTTGTTTCCGGCCTAGTAGAAGCCACGTTTCGCAAGAATTTTCTCAATCAGAATTTTCCGCAGCCAGTCCAGTCAGGACATCTGAACGCCCCTCGGATGCATCACTAGATGCTGGGCTAGAAAGCTCGAGTGCTTGTCACAGAAGCGGCCTGCGCGGTCCTGCGAAGCATTCCATGCTCAGTTTAGAAGAAATTGGCCTAGTCGGTGCTGCGCGCTGGCCAGATGATGCGCCGGGCTTAAATATTTCCAACAAAAGCAATACTCAAGAAAATAAGCGATACTGTGAAAGCTTATATCAAGCAGCACGAATTGCTGGTGGCTCCATAGCGTCTGGCAGAGTTACTAGTTTCGATGGGCTTTGGCGAAACGCAACAAAATGGCGCTTATCT…	MGNVCFRPSRSHVSQEFSQSEFSAASPVRTSERPSDASLDAGLESSSACHRSGLRGPAKHSMLSLEEIGLVGAARWPDDAPGLNISNKSNTQENKRYCESLYQAARIAGGSIASGRVTSFDGLWRNATKWRLSRILSGDASKIDFATVRMPNTRFVTSLRRPYHSVIERVRNHSDANSEIYEGEYLGGIETKVYRQHGTISSTTIPMTIVSAVADDDDIHERLKSLPKNERRHLKDLMAASHPNMITHTDAVYLPMIKDHLESLYLQAIDPSLEQHEALELIARIHWWAASAAPDRRGSAAKAEFAARSIAFAHGIELPPFEHGAVPDIEAMLRSEEQFVEDYPNLFERPPQ	1059	352
PgyICMP2185_AvrB2c_1	PgyICMP2185	AvrB	AvrB	AvrB	AvrB2	15	73	57	ATGGGAAATGTTTGTTTCCGGCCTAGTAGAAGCCACGTTTCGCAAGAATTTTCTCAATCAGAATTTTCCGCAGCCAGTCCAGTCAGGACATCTGAACGCCCCTCGGATGCATCACTAGATGCTGGGCTAGAAAGCTCGAGTGCTTGTCACAGAAGCGGCCTGCGCGGTCCTGCGAAGCATTCCATGCTCAGTTTAGAAGAAATTGGCCTAGTCGGTGCTGCGCGCTGGCCAGATGATGCGCCGGGCTTAAATATTTCCAACAAAAGCAATACTCAAGAAAATAAGCGATACTGTGAAAGCTTATATCAAGCAGCACGAATTGCTGGTGGCTCCATAGCGTCTGGCAGAGTTACTAGTTTCGATGGGCTTTGGCGAAACGCAACAAAATGGCGCTTATCT…	MGNVCFRPSRSHVSQEFSQSEFSAASPVRTSERPSDASLDAGLESSSACHRSGLRGPAKHSMLSLEEIGLVGAARWPDDAPGLNISNKSNTQENKRYCESLYQAARIAGGSIASGRVTSFDGLWRNATKWRLSRILSGDASKIDFATVRMPNTRFVTSLRRPYHSVIERVRNHSDANSEIYEGEYLGGIETKVYRQHGTISSTTIPMTIVSAVADDDDIHERLKSLPKNERRHLKDLMAASHPNMITHTDAVYLPMIKDHLESLYLQAIDPSLEQHEALELIARIHWWAASAAPDRRGSAAKAEFAARSIAFAHGIELPPFEHGAVPDIEAMLRSEEQFVEDYPNLFERPPQ	1059	352
PgyICMP4324_AvrB2c_1	PgyICMP4324	AvrB	AvrB	AvrB	AvrB2	15	73	57	ATGGGAAATGTTTGTTTCCGGCCTAGTAGAAGCCACGTTTCGCAAGAATTTTCTCAATCAGAATTTTCCGCAGCCAGTCCAGTCAGGACATCTGAACGCCCCTCGGATGCATCACTAGATGCTGGGCTAGAAAGCTCGAGTGCTTGTCACAGAAGCGGCCTGCGCGGTCCTGCGAAGCATTCCATGCTCAGTTTAGAAGAAATTGGCCTAGTCGGTGCTGCGCGCTGGCCAGATGATGCGCCGGGCTTAAATATTTCCAACAAAAGCAATACTCAAGAAAATAAGCGATACTGTGAAAGCTTATATCAAGCAGCACGAATTGCTGGTGGCTCCATAGCGTCTGGCAGAGTTACTAGTTTCGATGGGCTTTGGCGAAACGCAACAAAATGGCGCTTATCT…	MGNVCFRPSRSHVSQEFSQSEFSAASPVRTSERPSDASLDAGLESSSACHRSGLRGPAKHSMLSLEEIGLVGAARWPDDAPGLNISNKSNTQENKRYCESLYQAARIAGGSIASGRVTSFDGLWRNATKWRLSRILSGDASKIDFATVRMPNTRFVTSLRRPYHSVIERVRNHSDANSEIYEGEYLGGIETKVYRQHGTISSTTIPMTIVSAVADDDDIHERLKSLPKNERRHLKDLMAASHPNMITHTDAVYLPMIKDHLESLYLQAIDPSLEQHEALELIARIHWWAASAAPDRRGSAAKAEFAARSIAFAHGIELPPFEHGAVPDIEAMLRSEEQFVEDYPNLFERPPQ	1059	352
PgyICMP4332_AvrB2c_1	PgyICMP4332	AvrB	AvrB	AvrB	AvrB2	15	73	57	ATGGGAAATGTTTGTTTCCGGCCTAGTAGAAGCCACGTTTCGCAAGAATTTTCTCAATCAGAATTTTCCGCAGCCAGTCCAGTCAGGACATCTGAACGCCCCTCGGATGCATCACTAGATGCTGGGCTAGAAAGCTCGAGTGCTTGTCACAGAAGCGGCCTGCGCGGTCCTGCGAAGCATTCCATGCTCAGTTTAGAAGAAATTGGCCTAGTCGGTGCTGCGCGCTGGCCAGATGATGCGCCGGGCTTAAATATTTCCAACAAAAGCAATACTCAAGAAAATAAGCGATACTGTGAAAGCTTATATCAAGCAGCACGAATTGCTGGTGGCTCCATAGCGTCTGGCAGAGTTACTAGTTTCGATGGGCTTTGGCGAAACGCAACAAAATGGCGCTTATCT…	MGNVCFRPSRSHVSQEFSQSEFSAASPVRTSERPSDASLDAGLESSSACHRSGLRGPAKHSMLSLEEIGLVGAARWPDDAPGLNISNKSNTQENKRYCESLYQAARIAGGSIASGRVTSFDGLWRNATKWRLSRILSGDASKIDFATVRMPNTRFVTSLRRPYHSVIERVRNHSDANSEIYEGEYLGGIETKVYRQHGTISSTTIPMTIVSAVADDDDIHERLKSLPKNERRHLKDLMAASHPNMITHTDAVYLPMIKDHLESLYLQAIDPSLEQHEALELIARIHWWAASAAPDRRGSAAKAEFAARSIAFAHGIELPPFEHGAVPDIEAMLRSEEQFVEDYPNLFERPPQ	1059	352
PgyICMP4333_AvrB2c_1	PgyICMP4333	AvrB	AvrB	AvrB	AvrB2	15	73	57	ATGGGAAATGTTTGTTTCCGGCCTAGTAGAAGCCACGTTTCGCAAGAATTTTCTCAATCAGAATTTTCCGCAGCCAGTCCAGTCAGGACATCTGAACGCCCCTCGGATGCATCACTAGATGCTGGGCTAGAAAGCTCGAGTGCTTGTCACAGAAGCGGCCTGCGCGGTCCTGCGAAGCATTCCATGCTCAGTTTAGAAGAAATTGGCCTAGTCGGTGCTGCGCGCTGGCCAGATGATGCGCCGGGCTTAAATATTTCCAACAAAAGCAATACTCAAGAAAATAAGCGATACTGTGAAAGCTTATATCAAGCAGCACGAATTGCTGGTGGCTCCATAGCGTCTGGCAGAGTTACTAGTTTCGATGGGCTTTGGCGAAACGCAACAAAATGGCGCTTATCT…	MGNVCFRPSRSHVSQEFSQSEFSAASPVRTSERPSDASLDAGLESSSACHRSGLRGPAKHSMLSLEEIGLVGAARWPDDAPGLNISNKSNTQENKRYCESLYQAARIAGGSIASGRVTSFDGLWRNATKWRLSRILSGDASKIDFATVRMPNTRFVTSLRRPYHSVIERVRNHSDANSEIYEGEYLGGIETKVYRQHGTISSTTIPMTIVSAVADDDDIHERLKSLPKNERRHLKDLMAASHPNMITHTDAVYLPMIKDHLESLYLQAIDPSLEQHEALELIARIHWWAASAAPDRRGSAAKAEFAARSIAFAHGIELPPFEHGAVPDIEAMLRSEEQFVEDYPNLFERPPQ	1059	352
PmeN6801_AvrB2c_1	PmeN6801	AvrB	AvrB	AvrB	AvrB2	15	73	57	ATGGGAAATGTTTGTTTCCGGCCTAGTAGAAGCCACGTTTCGCAAGAATTTTCTCAATCAGAATTTTCCGCAGCCAGTCCAGTCAGGACATCTGAACGCCCCTCGGATGCATCACTAGATGCTGGGCTAGAAAGCTCGAGTGCTTGTCACAGAAGCGGCCTGCGCGGTCCTGCGAAGCATTCCATGCTCAGTTTAGAAGAAATTGGCCTAGTCGGTGCTGCGCGCTGGCCAGATGATGCGCCGGGCTTAAATATTTCCAACAAAAGCAATACTCAAGAAAATAAGCGATACTGTGAAAGCTTATATCAAGCAGCACGAATTGCTGGTGGCTCCATAGCGTCTGGCAGAGTTACTAGTTTCGATGGGCTTTGGCGAAACGCAACAAAATGGCGCTTATCT…	MGNVCFRPSRSHVSQEFSQSEFSAASPVRTSERPSDASLDAGLESSSACHRSGLRGPAKHSMLSLEEIGLVGAARWPDDAPGLNISNKSNTQENKRYCESLYQAARIAGGSIASGRVTSFDGLWRNATKWRLSRILSGDASKIDFATVRMPNTRFVTSLRRPYHSVIERVRNHSDANSEIYEGEYLGGIETKVYRQHGTISSTTIPMTIVSAVADDDDIHERLKSLPKNERRHLKDLMAASHPNMITHTDAVYLPMIKDHLESLYLQAIDPSLEQHEALELIARIHWWAASAAPDRRGSAAKAEFAARSIAFAHGIELPPFEHGAVPDIEAMLRSEEQFVEDYPNLFERPPQ	1059	352
Pph1302A_AvrB2c_1	Pph1302A	AvrB	AvrB	AvrB	AvrB2	15	73	57	ATGGGAAATGTTTGTTTCCGGCCTAGTAGAAGCCACGTTTCGCAAGAATTTTCTCAATCAGAATTTTCCGCAGCCAGTCCAGTCAGGACATCTGAACGCCCCTCGGATGCATCACTAGATGCTGGGCTAGAAAGCTCGAGTGCTTGTCACAGAAGCGGCCTGCGCGGTCCTGCGAAGCATTCCATGCTCAGTTTAGAAGAAATTGGCCTAGTCGGTGCTGCGCGCTGGCCAGATGATGCGCCGGGCTTAAATATTTCCAACAAAAGCAATACTCAAGAAAATAAGCGATACTGTGAAAGCTTATATCAAGCAGCACGAATTGCTGGTGGCTCCATAGCGTCTGGCAGAGTTACTAGTTTCGATGGGCTTTGGCGAAACGCAACAAAATGGCGCTTATCT…	MGNVCFRPSRSHVSQEFSQSEFSAASPVRTSERPSDASLDAGLESSSACHRSGLRGPAKHSMLSLEEIGLVGAARWPDDAPGLNISNKSNTQENKRYCESLYQAARIAGGSIASGRVTSFDGLWRNATKWRLSRILSGDASKIDFATVRMPNTRFVTSLRRPYHSVIERVRNHSDANSEIYEGEYLGGIETKVYRQHGTISSTTIPMTIVSAVADDDDIHERLKSLPKNERRHLKDLMAASHPNMITHTDAVYLPMIKDHLESLYLQAIDPSLEQHEALELIARIHWWAASAAPDRRGSAAKAEFAARSIAFAHGIELPPFEHGAVPDIEAMLRSEEQFVEDYPNLFERPPQ	1059	352
Pph1448A_AvrB2c_1	Pph1448A	AvrB	AvrB	AvrB	AvrB2	15	73	57	ATGGGAAATGTTTGTTTCCGGCCTAGTAGAAGCCACGTTTCGCAAGAATTTTCTCAATCAGAATTTTCCGCAGCCAGTCCAGTCAGGACATCTGAACGCCCCTCGGATGCATCACTAGATGCTGGGCTAGAAAGCTCGAGTGCTTGTCACAGAAGCGGCCTGCGCGGTCCTGCGAAGCATTCCATGCTCAGTTTAGAAGAAATTGGCCTAGTCGGTGCTGCGCGCTGGCCAGATGATGCGCCGGGCTTAAATATTTCCAACAAAAGCAATACTCAAGAAAATAAGCGATACTGTGAAAGCTTATATCAAGCAGCACGAATTGCTGGTGGCTCCATAGCGTCTGGCAGAGTTACTAGTTTCGATGGGCTTTGGCGAAACGCAACAAAATGGCGCTTATCT…	MGNVCFRPSRSHVSQEFSQSEFSAASPVRTSERPSDASLDAGLESSSACHRSGLRGPAKHSMLSLEEIGLVGAARWPDDAPGLNISNKSNTQENKRYCESLYQAARIAGGSIASGRVTSFDGLWRNATKWRLSRILSGDASKIDFATVRMPNTRFVTSLRRPYHSVIERVRNHSDANSEIYEGEYLGGIETKVYRQHGTISSTTIPMTIVSAVADDDDIHERLKSLPKNERRHLKDLMAASHPNMITHTDAVYLPMIKDHLESLYLQAIDPSLEQHEALELIARIHWWAASAAPDRRGSAAKAEFAARSIAFAHGIELPPFEHGAVPDIEAMLRSEEQFVEDYPNLFERPPQ	1059	352
PphHB10Y_AvrB2c_1	PphHB10Y	AvrB	AvrB	AvrB	AvrB2	15	73	57	ATGGGAAATGTTTGTTTCCGGCCTAGTAGAAGCCACGTTTCGCAAGAATTTTCTCAATCAGAATTTTCCGCAGCCAGTCCAGTCAGGACATCTGAACGCCCCTCGGATGCATCACTAGATGCTGGGCTAGAAAGCTCGAGTGCTTGTCACAGAAGCGGCCTGCGCGGTCCTGCGAAGCATTCCATGCTCAGTTTAGAAGAAATTGGCCTAGTCGGTGCTGCGCGCTGGCCAGATGATGCGCCGGGCTTAAATATTTCCAACAAAAGCAATACTCAAGAAAATAAGCGATACTGTGAAAGCTTATATCAAGCAGCACGAATTGCTGGTGGCTCCATAGCGTCTGGCAGAGTTACTAGTTTCGATGGGCTTTGGCGAAACGCAACAAAATGGCGCTTATCT…	MGNVCFRPSRSHVSQEFSQSEFSAASPVRTSERPSDASLDAGLESSSACHRSGLRGPAKHSMLSLEEIGLVGAARWPDDAPGLNISNKSNTQENKRYCESLYQAARIAGGSIASGRVTSFDGLWRNATKWRLSRILSGDASKIDFATVRMPNTRFVTSLRRPYHSVIERVRNHSDANSEIYEGEYLGGIETKVYRQHGTISSTTIPMTIVSAVADDDDIHERLKSLPKNERRHLKDLMAASHPNMITHTDAVYLPMIKDHLESLYLQAIDPSLEQHEALELIARIHWWAASAAPDRRGSAAKAEFAARSIAFAHGIELPPFEHGAVPDIEAMLRSEEQFVEDYPNLFERPPQ	1059	352
PphICMP2740_AvrB2c_1	PphICMP2740	AvrB	AvrB	AvrB	AvrB2	15	73	57	ATGGGAAATGTTTGTTTCCGGCCTAGTAGAAGCCACGTTTCGCAAGAATTTTCTCAATCAGAATTTTCCGCAGCCAGTCCAGTCAGGACATCTGAACGCCCCTCGGATGCATCACTAGATGCTGGGCTAGAAAGCTCGAGTGCTTGTCACAGAAGCGGCCTGCGCGGTCCTGCGAAGCATTCCATGCTCAGTTTAGAAGAAATTGGCCTAGTCGGTGCTGCGCGCTGGCCAGATGATGCGCCGGGCTTAAATATTTCCAACAAAAGCAATACTCAAGAAAATAAGCGATACTGTGAAAGCTTATATCAAGCAGCACGAATTGCTGGTGGCTCCATAGCGTCTGGCAGAGTTACTAGTTTCGATGGGCTTTGGCGAAACGCAACAAAATGGCGCTTATCT…	MGNVCFRPSRSHVSQEFSQSEFSAASPVRTSERPSDASLDAGLESSSACHRSGLRGPAKHSMLSLEEIGLVGAARWPDDAPGLNISNKSNTQENKRYCESLYQAARIAGGSIASGRVTSFDGLWRNATKWRLSRILSGDASKIDFATVRMPNTRFVTSLRRPYHSVIERVRNHSDANSEIYEGEYLGGIETKVYRQHGTISSTTIPMTIVSAVADDDDIHERLKSLPKNERRHLKDLMAASHPNMITHTDAVYLPMIKDHLESLYLQAIDPSLEQHEALELIARIHWWAASAAPDRRGSAAKAEFAARSIAFAHGIELPPFEHGAVPDIEAMLRSEEQFVEDYPNLFERPPQ	1059	352
PphICMP637_AvrB2c_1	PphICMP637	AvrB	AvrB	AvrB	AvrB2	15	73	57	ATGGGAAATGTTTGTTTCCGGCCTAGTAGAAGCCACGTTTCGCAAGAATTTTCTCAATCAGAATTTTCCGCAGCCAGTCCAGTCAGGACATCTGAACGCCCCTCGGATGCATCACTAGATGCTGGGCTAGAAAGCTCGAGTGCTTGTCACAGAAGCGGCCTGCGCGGTCCTGCGAAGCATTCCATGCTCAGTTTAGAAGAAATTGGCCTAGTCGGTGCTGCGCGCTGGCCAGATGATGCGCCGGGCTTAAATATTTCCAACAAAAGCAATACTCAAGAAAATAAGCGATACTGTGAAAGCTTATATCAAGCAGCACGAATTGCTGGTGGCTCCATAGCGTCTGGCAGAGTTACTAGTTTCGATGGGCTTTGGCGAAACGCAACAAAATGGCGCTTATCT…	MGNVCFRPSRSHVSQEFSQSEFSAASPVRTSERPSDASLDAGLESSSACHRSGLRGPAKHSMLSLEEIGLVGAARWPDDAPGLNISNKSNTQENKRYCESLYQAARIAGGSIASGRVTSFDGLWRNATKWRLSRILSGDASKIDFATVRMPNTRFVTSLRRPYHSVIERVRNHSDANSEIYEGEYLGGIETKVYRQHGTISSTTIPMTIVSAVADDDDIHERLKSLPKNERRHLKDLMAASHPNMITHTDAVYLPMIKDHLESLYLQAIDPSLEQHEALELIARIHWWAASAAPDRRGSAAKAEFAARSIAFAHGIELPPFEHGAVPDIEAMLRSEEQFVEDYPNLFERPPQ	1059	352
PphKN86_AvrB2c_1	PphKN86	AvrB	AvrB	AvrB	AvrB2	15	73	57	ATGGGAAATGTTTGTTTCCGGCCTAGTAGAAGCCACGTTTCGCAAGAATTTTCTCAATCAGAATTTTCCGCAGCCAGTCCAGTCAGGACATCTGAACGCCCCTCGGATGCATCACTAGATGCTGGGCTAGAAAGCTCGAGTGCTTGTCACAGAAGCGGCCTGCGCGGTCCTGCGAAGCATTCCATGCTCAGTTTAGAAGAAATTGGCCTAGTCGGTGCTGCGCGCTGGCCAGATGATGCGCCGGGCTTAAATATTTCCAACAAAAGCAATACTCAAGAAAATAAGCGATACTGTGAAAGCTTATATCAAGCAGCACGAATTGCTGGTGGCTCCATAGCGTCTGGCAGAGTTACTAGTTTCGATGGGCTTTGGCGAAACGCAACAAAATGGCGCTTATCT…	MGNVCFRPSRSHVSQEFSQSEFSAASPVRTSERPSDASLDAGLESSSACHRSGLRGPAKHSMLSLEEIGLVGAARWPDDAPGLNISNKSNTQENKRYCESLYQAARIAGGSIASGRVTSFDGLWRNATKWRLSRILSGDASKIDFATVRMPNTRFVTSLRRPYHSVIERVRNHSDANSEIYEGEYLGGIETKVYRQHGTISSTTIPMTIVSAVADDDDIHERLKSLPKNERRHLKDLMAASHPNMITHTDAVYLPMIKDHLESLYLQAIDPSLEQHEALELIARIHWWAASAAPDRRGSAAKAEFAARSIAFAHGIELPPFEHGAVPDIEAMLRSEEQFVEDYPNLFERPPQ	1059	352
PphNPS3121_AvrB2c_1	PphNPS3121	AvrB	AvrB	AvrB	AvrB2	15	73	57	ATGGGAAATGTTTGTTTCCGGCCTAGTAGAAGCCACGTTTCGCAAGAATTTTCTCAATCAGAATTTTCCGCAGCCAGTCCAGTCAGGACATCTGAACGCCCCTCGGATGCATCACTAGATGCTGGGCTAGAAAGCTCGAGTGCTTGTCACAGAAGCGGCCTGCGCGGTCCTGCGAAGCATTCCATGCTCAGTTTAGAAGAAATTGGCCTAGTCGGTGCTGCGCGCTGGCCAGATGATGCGCCGGGCTTAAATATTTCCAACAAAAGCAATACTCAAGAAAATAAGCGATACTGTGAAAGCTTATATCAAGCAGCACGAATTGCTGGTGGCTCCATAGCGTCTGGCAGAGTTACTAGTTTCGATGGGCTTTGGCGAAACGCAACAAAATGGCGCTTATCT…	MGNVCFRPSRSHVSQEFSQSEFSAASPVRTSERPSDASLDAGLESSSACHRSGLRGPAKHSMLSLEEIGLVGAARWPDDAPGLNISNKSNTQENKRYCESLYQAARIAGGSIASGRVTSFDGLWRNATKWRLSRILSGDASKIDFATVRMPNTRFVTSLRRPYHSVIERVRNHSDANSEIYEGEYLGGIETKVYRQHGTISSTTIPMTIVSAVADDDDIHERLKSLPKNERRHLKDLMAASHPNMITHTDAVYLPMIKDHLESLYLQAIDPSLEQHEALELIARIHWWAASAAPDRRGSAAKAEFAARSIAFAHGIELPPFEHGAVPDIEAMLRSEEQFVEDYPNLFERPPQ	1059	352
Psy0506_AvrB2c_1	Psy0506	AvrB	AvrB	AvrB	AvrB2	15	73	57	ATGGGAAATGTTTGTTTCCGGCCTAGTAGAAGCCACGTTTCGCAAGAATTTTCTCAATCAGAATTTTCCGCAGCCAGTCCAGTCAGGACATCTGAACGCCCCTCGGATGCATCACTAGATGCTGGGCTAGAAAGCTCGAGTGCTTGTCACAGAAGCGGCCTGCGCGGTCCTGCGAAGCATTCCATGCTCAGTTTAGAAGAAATTGGCCTAGTCGGTGCTGCGCGCTGGCCAGATGATGCGCCGGGCTTAAATATTTCCAACAAAAGCAATACTCAAGAAAATAAGCGATACTGTGAAAGCTTATATCAAGCAGCACGAATTGCTGGTGGCTCCATAGCGTCTGGCAGAGTTACTAGTTTCGATGGGCTTTGGCGAAACGCAACAAAATGGCGCTTATCT…	MGNVCFRPSRSHVSQEFSQSEFSAASPVRTSERPSDASLDAGLESSSACHRSGLRGPAKHSMLSLEEIGLVGAARWPDDAPGLNISNKSNTQENKRYCESLYQAARIAGGSIASGRVTSFDGLWRNATKWRLSRILSGDASKIDFATVRMPNTRFVTSLRRPYHSVIERVRNHSDANSEIYEGEYLGGIETKVYRQHGTISSTTIPMTIVSAVADDDDIHERLKSLPKNERRHLKDLMAASHPNMITHTDAVYLPMIKDHLESLYLQAIDPSLEQHEALELIARIHWWAASAAPDRRGSAAKAEFAARSIAFAHGIELPPFEHGAVPDIEAMLRSEEQFVEDYPNLFERPPQ	1059	352
Psy0507_AvrB2c_1	Psy0507	AvrB	AvrB	AvrB	AvrB2	15	73	57	ATGGGAAATGTTTGTTTCCGGCCTAGTAGAAGCCACGTTTCGCAAGAATTTTCTCAATCAGAATTTTCCGCAGCCAGTCCAGTCAGGACATCTGAACGCCCCTCGGATGCATCACTAGATGCTGGGCTAGAAAGCTCGAGTGCTTGTCACAGAAGCGGCCTGCGCGGTCCTGCGAAGCATTCCATGCTCAGTTTAGAAGAAATTGGCCTAGTCGGTGCTGCGCGCTGGCCAGATGATGCGCCGGGCTTAAATATTTCCAACAAAAGCAATACTCAAGAAAATAAGCGATACTGTGAAAGCTTATATCAAGCAGCACGAATTGCTGGTGGCTCCATAGCGTCTGGCAGAGTTACTAGTTTCGATGGGCTTTGGCGAAACGCAACAAAATGGCGCTTATCT…	MGNVCFRPSRSHVSQEFSQSEFSAASPVRTSERPSDASLDAGLESSSACHRSGLRGPAKHSMLSLEEIGLVGAARWPDDAPGLNISNKSNTQENKRYCESLYQAARIAGGSIASGRVTSFDGLWRNATKWRLSRILSGDASKIDFATVRMPNTRFVTSLRRPYHSVIERVRNHSDANSEIYEGEYLGGIETKVYRQHGTISSTTIPMTIVSAVADDDDIHERLKSLPKNERRHLKDLMAASHPNMITHTDAVYLPMIKDHLESLYLQAIDPSLEQHEALELIARIHWWAASAAPDRRGSAAKAEFAARSIAFAHGIELPPFEHGAVPDIEAMLRSEEQFVEDYPNLFERPPQ	1059	352
Psy0508_AvrB2c_1	Psy0508	AvrB	AvrB	AvrB	AvrB2	15	73	57	ATGGGAAATGTTTGTTTCCGGCCTAGTAGAAGCCACGTTTCGCAAGAATTTTCTCAATCAGAATTTTCCGCAGCCAGTCCAGTCAGGACATCTGAACGCCCCTCGGATGCATCACTAGATGCTGGGCTAGAAAGCTCGAGTGCTTGTCACAGAAGCGGCCTGCGCGGTCCTGCGAAGCATTCCATGCTCAGTTTAGAAGAAATTGGCCTAGTCGGTGCTGCGCGCTGGCCAGATGATGCGCCGGGCTTAAATATTTCCAACAAAAGCAATACTCAAGAAAATAAGCGATACTGTGAAAGCTTATATCAAGCAGCACGAATTGCTGGTGGCTCCATAGCGTCTGGCAGAGTTACTAGTTTCGATGGGCTTTGGCGAAACGCAACAAAATGGCGCTTATCT…	MGNVCFRPSRSHVSQEFSQSEFSAASPVRTSERPSDASLDAGLESSSACHRSGLRGPAKHSMLSLEEIGLVGAARWPDDAPGLNISNKSNTQENKRYCESLYQAARIAGGSIASGRVTSFDGLWRNATKWRLSRILSGDASKIDFATVRMPNTRFVTSLRRPYHSVIERVRNHSDANSEIYEGEYLGGIETKVYRQHGTISSTTIPMTIVSAVADDDDIHERLKSLPKNERRHLKDLMAASHPNMITHTDAVYLPMIKDHLESLYLQAIDPSLEQHEALELIARIHWWAASAAPDRRGSAAKAEFAARSIAFAHGIELPPFEHGAVPDIEAMLRSEEQFVEDYPNLFERPPQ	1059	352
Psy0509_AvrB2c_1	Psy0509	AvrB	AvrB	AvrB	AvrB2	15	73	57	ATGGGAAATGTTTGTTTCCGGCCTAGTAGAAGCCACGTTTCGCAAGAATTTTCTCAATCAGAATTTTCCGCAGCCAGTCCAGTCAGGACATCTGAACGCCCCTCGGATGCATCACTAGATGCTGGGCTAGAAAGCTCGAGTGCTTGTCACAGAAGCGGCCTGCGCGGTCCTGCGAAGCATTCCATGCTCAGTTTAGAAGAAATTGGCCTAGTCGGTGCTGCGCGCTGGCCAGATGATGCGCCGGGCTTAAATATTTCCAACAAAAGCAATACTCAAGAAAATAAGCGATACTGTGAAAGCTTATATCAAGCAGCACGAATTGCTGGTGGCTCCATAGCGTCTGGCAGAGTTACTAGTTTCGATGGGCTTTGGCGAAACGCAACAAAATGGCGCTTATCT…	MGNVCFRPSRSHVSQEFSQSEFSAASPVRTSERPSDASLDAGLESSSACHRSGLRGPAKHSMLSLEEIGLVGAARWPDDAPGLNISNKSNTQENKRYCESLYQAARIAGGSIASGRVTSFDGLWRNATKWRLSRILSGDASKIDFATVRMPNTRFVTSLRRPYHSVIERVRNHSDANSEIYEGEYLGGIETKVYRQHGTISSTTIPMTIVSAVADDDDIHERLKSLPKNERRHLKDLMAASHPNMITHTDAVYLPMIKDHLESLYLQAIDPSLEQHEALELIARIHWWAASAAPDRRGSAAKAEFAARSIAFAHGIELPPFEHGAVPDIEAMLRSEEQFVEDYPNLFERPPQ	1059	352
Psy0510_AvrB2c_1	Psy0510	AvrB	AvrB	AvrB	AvrB2	15	73	57	ATGGGAAATGTTTGTTTCCGGCCTAGTAGAAGCCACGTTTCGCAAGAATTTTCTCAATCAGAATTTTCCGCAGCCAGTCCAGTCAGGACATCTGAACGCCCCTCGGATGCATCACTAGATGCTGGGCTAGAAAGCTCGAGTGCTTGTCACAGAAGCGGCCTGCGCGGTCCTGCGAAGCATTCCATGCTCAGTTTAGAAGAAATTGGCCTAGTCGGTGCTGCGCGCTGGCCAGATGATGCGCCGGGCTTAAATATTTCCAACAAAAGCAATACTCAAGAAAATAAGCGATACTGTGAAAGCTTATATCAAGCAGCACGAATTGCTGGTGGCTCCATAGCGTCTGGCAGAGTTACTAGTTTCGATGGGCTTTGGCGAAACGCAACAAAATGGCGCTTATCT…	MGNVCFRPSRSHVSQEFSQSEFSAASPVRTSERPSDASLDAGLESSSACHRSGLRGPAKHSMLSLEEIGLVGAARWPDDAPGLNISNKSNTQENKRYCESLYQAARIAGGSIASGRVTSFDGLWRNATKWRLSRILSGDASKIDFATVRMPNTRFVTSLRRPYHSVIERVRNHSDANSEIYEGEYLGGIETKVYRQHGTISSTTIPMTIVSAVADDDDIHERLKSLPKNERRHLKDLMAASHPNMITHTDAVYLPMIKDHLESLYLQAIDPSLEQHEALELIARIHWWAASAAPDRRGSAAKAEFAARSIAFAHGIELPPFEHGAVPDIEAMLRSEEQFVEDYPNLFERPPQ	1059	352
Psy0511_AvrB2c_1	Psy0511	AvrB	AvrB	AvrB	AvrB2	15	73	57	ATGGGAAATGTTTGTTTCCGGCCTAGTAGAAGCCACGTTTCGCAAGAATTTTCTCAATCAGAATTTTCCGCAGCCAGTCCAGTCAGGACATCTGAACGCCCCTCGGATGCATCACTAGATGCTGGGCTAGAAAGCTCGAGTGCTTGTCACAGAAGCGGCCTGCGCGGTCCTGCGAAGCATTCCATGCTCAGTTTAGAAGAAATTGGCCTAGTCGGTGCTGCGCGCTGGCCAGATGATGCGCCGGGCTTAAATATTTCCAACAAAAGCAATACTCAAGAAAATAAGCGATACTGTGAAAGCTTATATCAAGCAGCACGAATTGCTGGTGGCTCCATAGCGTCTGGCAGAGTTACTAGTTTCGATGGGCTTTGGCGAAACGCAACAAAATGGCGCTTATCT…	MGNVCFRPSRSHVSQEFSQSEFSAASPVRTSERPSDASLDAGLESSSACHRSGLRGPAKHSMLSLEEIGLVGAARWPDDAPGLNISNKSNTQENKRYCESLYQAARIAGGSIASGRVTSFDGLWRNATKWRLSRILSGDASKIDFATVRMPNTRFVTSLRRPYHSVIERVRNHSDANSEIYEGEYLGGIETKVYRQHGTISSTTIPMTIVSAVADDDDIHERLKSLPKNERRHLKDLMAASHPNMITHTDAVYLPMIKDHLESLYLQAIDPSLEQHEALELIARIHWWAASAAPDRRGSAAKAEFAARSIAFAHGIELPPFEHGAVPDIEAMLRSEEQFVEDYPNLFERPPQ	1059	352
Psy0512_AvrB2c_1	Psy0512	AvrB	AvrB	AvrB	AvrB2	15	73	57	ATGGGAAATGTTTGTTTCCGGCCTAGTAGAAGCCACGTTTCGCAAGAATTTTCTCAATCAGAATTTTCCGCAGCCAGTCCAGTCAGGACATCTGAACGCCCCTCGGATGCATCACTAGATGCTGGGCTAGAAAGCTCGAGTGCTTGTCACAGAAGCGGCCTGCGCGGTCCTGCGAAGCATTCCATGCTCAGTTTAGAAGAAATTGGCCTAGTCGGTGCTGCGCGCTGGCCAGATGATGCGCCGGGCTTAAATATTTCCAACAAAAGCAATACTCAAGAAAATAAGCGATACTGTGAAAGCTTATATCAAGCAGCACGAATTGCTGGTGGCTCCATAGCGTCTGGCAGAGTTACTAGTTTCGATGGGCTTTGGCGAAACGCAACAAAATGGCGCTTATCT…	MGNVCFRPSRSHVSQEFSQSEFSAASPVRTSERPSDASLDAGLESSSACHRSGLRGPAKHSMLSLEEIGLVGAARWPDDAPGLNISNKSNTQENKRYCESLYQAARIAGGSIASGRVTSFDGLWRNATKWRLSRILSGDASKIDFATVRMPNTRFVTSLRRPYHSVIERVRNHSDANSEIYEGEYLGGIETKVYRQHGTISSTTIPMTIVSAVADDDDIHERLKSLPKNERRHLKDLMAASHPNMITHTDAVYLPMIKDHLESLYLQAIDPSLEQHEALELIARIHWWAASAAPDRRGSAAKAEFAARSIAFAHGIELPPFEHGAVPDIEAMLRSEEQFVEDYPNLFERPPQ	1059	352
Psy0513_AvrB2c_1	Psy0513	AvrB	AvrB	AvrB	AvrB2	15	73	57	ATGGGAAATGTTTGTTTCCGGCCTAGTAGAAGCCACGTTTCGCAAGAATTTTCTCAATCAGAATTTTCCGCAGCCAGTCCAGTCAGGACATCTGAACGCCCCTCGGATGCATCACTAGATGCTGGGCTAGAAAGCTCGAGTGCTTGTCACAGAAGCGGCCTGCGCGGTCCTGCGAAGCATTCCATGCTCAGTTTAGAAGAAATTGGCCTAGTCGGTGCTGCGCGCTGGCCAGATGATGCGCCGGGCTTAAATATTTCCAACAAAAGCAATACTCAAGAAAATAAGCGATACTGTGAAAGCTTATATCAAGCAGCACGAATTGCTGGTGGCTCCATAGCGTCTGGCAGAGTTACTAGTTTCGATGGGCTTTGGCGAAACGCAACAAAATGGCGCTTATCT…	MGNVCFRPSRSHVSQEFSQSEFSAASPVRTSERPSDASLDAGLESSSACHRSGLRGPAKHSMLSLEEIGLVGAARWPDDAPGLNISNKSNTQENKRYCESLYQAARIAGGSIASGRVTSFDGLWRNATKWRLSRILSGDASKIDFATVRMPNTRFVTSLRRPYHSVIERVRNHSDANSEIYEGEYLGGIETKVYRQHGTISSTTIPMTIVSAVADDDDIHERLKSLPKNERRHLKDLMAASHPNMITHTDAVYLPMIKDHLESLYLQAIDPSLEQHEALELIARIHWWAASAAPDRRGSAAKAEFAARSIAFAHGIELPPFEHGAVPDIEAMLRSEEQFVEDYPNLFERPPQ	1059	352
Psy0514_AvrB2c_1	Psy0514	AvrB	AvrB	AvrB	AvrB2	15	73	57	ATGGGAAATGTTTGTTTCCGGCCTAGTAGAAGCCACGTTTCGCAAGAATTTTCTCAATCAGAATTTTCCGCAGCCAGTCCAGTCAGGACATCTGAACGCCCCTCGGATGCATCACTAGATGCTGGGCTAGAAAGCTCGAGTGCTTGTCACAGAAGCGGCCTGCGCGGTCCTGCGAAGCATTCCATGCTCAGTTTAGAAGAAATTGGCCTAGTCGGTGCTGCGCGCTGGCCAGATGATGCGCCGGGCTTAAATATTTCCAACAAAAGCAATACTCAAGAAAATAAGCGATACTGTGAAAGCTTATATCAAGCAGCACGAATTGCTGGTGGCTCCATAGCGTCTGGCAGAGTTACTAGTTTCGATGGGCTTTGGCGAAACGCAACAAAATGGCGCTTATCT…	MGNVCFRPSRSHVSQEFSQSEFSAASPVRTSERPSDASLDAGLESSSACHRSGLRGPAKHSMLSLEEIGLVGAARWPDDAPGLNISNKSNTQENKRYCESLYQAARIAGGSIASGRVTSFDGLWRNATKWRLSRILSGDASKIDFATVRMPNTRFVTSLRRPYHSVIERVRNHSDANSEIYEGEYLGGIETKVYRQHGTISSTTIPMTIVSAVADDDDIHERLKSLPKNERRHLKDLMAASHPNMITHTDAVYLPMIKDHLESLYLQAIDPSLEQHEALELIARIHWWAASAAPDRRGSAAKAEFAARSIAFAHGIELPPFEHGAVPDIEAMLRSEEQFVEDYPNLFERPPQ	1059	352
Psy0515_AvrB2c_1	Psy0515	AvrB	AvrB	AvrB	AvrB2	15	73	57	ATGGGAAATGTTTGTTTCCGGCCTAGTAGAAGCCACGTTTCGCAAGAATTTTCTCAATCAGAATTTTCCGCAGCCAGTCCAGTCAGGACATCTGAACGCCCCTCGGATGCATCACTAGATGCTGGGCTAGAAAGCTCGAGTGCTTGTCACAGAAGCGGCCTGCGCGGTCCTGCGAAGCATTCCATGCTCAGTTTAGAAGAAATTGGCCTAGTCGGTGCTGCGCGCTGGCCAGATGATGCGCCGGGCTTAAATATTTCCAACAAAAGCAATACTCAAGAAAATAAGCGATACTGTGAAAGCTTATATCAAGCAGCACGAATTGCTGGTGGCTCCATAGCGTCTGGCAGAGTTACTAGTTTCGATGGGCTTTGGCGAAACGCAACAAAATGGCGCTTATCT…	MGNVCFRPSRSHVSQEFSQSEFSAASPVRTSERPSDASLDAGLESSSACHRSGLRGPAKHSMLSLEEIGLVGAARWPDDAPGLNISNKSNTQENKRYCESLYQAARIAGGSIASGRVTSFDGLWRNATKWRLSRILSGDASKIDFATVRMPNTRFVTSLRRPYHSVIERVRNHSDANSEIYEGEYLGGIETKVYRQHGTISSTTIPMTIVSAVADDDDIHERLKSLPKNERRHLKDLMAASHPNMITHTDAVYLPMIKDHLESLYLQAIDPSLEQHEALELIARIHWWAASAAPDRRGSAAKAEFAARSIAFAHGIELPPFEHGAVPDIEAMLRSEEQFVEDYPNLFERPPQ	1059	352
Psy0516_AvrB2c_1	Psy0516	AvrB	AvrB	AvrB	AvrB2	15	73	57	ATGGGAAATGTTTGTTTCCGGCCTAGTAGAAGCCACGTTTCGCAAGAATTTTCTCAATCAGAATTTTCCGCAGCCAGTCCAGTCAGGACATCTGAACGCCCCTCGGATGCATCACTAGATGCTGGGCTAGAAAGCTCGAGTGCTTGTCACAGAAGCGGCCTGCGCGGTCCTGCGAAGCATTCCATGCTCAGTTTAGAAGAAATTGGCCTAGTCGGTGCTGCGCGCTGGCCAGATGATGCGCCGGGCTTAAATATTTCCAACAAAAGCAATACTCAAGAAAATAAGCGATACTGTGAAAGCTTATATCAAGCAGCACGAATTGCTGGTGGCTCCATAGCGTCTGGCAGAGTTACTAGTTTCGATGGGCTTTGGCGAAACGCAACAAAATGGCGCTTATCT…	MGNVCFRPSRSHVSQEFSQSEFSAASPVRTSERPSDASLDAGLESSSACHRSGLRGPAKHSMLSLEEIGLVGAARWPDDAPGLNISNKSNTQENKRYCESLYQAARIAGGSIASGRVTSFDGLWRNATKWRLSRILSGDASKIDFATVRMPNTRFVTSLRRPYHSVIERVRNHSDANSEIYEGEYLGGIETKVYRQHGTISSTTIPMTIVSAVADDDDIHERLKSLPKNERRHLKDLMAASHPNMITHTDAVYLPMIKDHLESLYLQAIDPSLEQHEALELIARIHWWAASAAPDRRGSAAKAEFAARSIAFAHGIELPPFEHGAVPDIEAMLRSEEQFVEDYPNLFERPPQ	1059	352
Psy0517_AvrB2c_1	Psy0517	AvrB	AvrB	AvrB	AvrB2	15	73	57	ATGGGAAATGTTTGTTTCCGGCCTAGTAGAAGCCACGTTTCGCAAGAATTTTCTCAATCAGAATTTTCCGCAGCCAGTCCAGTCAGGACATCTGAACGCCCCTCGGATGCATCACTAGATGCTGGGCTAGAAAGCTCGAGTGCTTGTCACAGAAGCGGCCTGCGCGGTCCTGCGAAGCATTCCATGCTCAGTTTAGAAGAAATTGGCCTAGTCGGTGCTGCGCGCTGGCCAGATGATGCGCCGGGCTTAAATATTTCCAACAAAAGCAATACTCAAGAAAATAAGCGATACTGTGAAAGCTTATATCAAGCAGCACGAATTGCTGGTGGCTCCATAGCGTCTGGCAGAGTTACTAGTTTCGATGGGCTTTGGCGAAACGCAACAAAATGGCGCTTATCT…	MGNVCFRPSRSHVSQEFSQSEFSAASPVRTSERPSDASLDAGLESSSACHRSGLRGPAKHSMLSLEEIGLVGAARWPDDAPGLNISNKSNTQENKRYCESLYQAARIAGGSIASGRVTSFDGLWRNATKWRLSRILSGDASKIDFATVRMPNTRFVTSLRRPYHSVIERVRNHSDANSEIYEGEYLGGIETKVYRQHGTISSTTIPMTIVSAVADDDDIHERLKSLPKNERRHLKDLMAASHPNMITHTDAVYLPMIKDHLESLYLQAIDPSLEQHEALELIARIHWWAASAAPDRRGSAAKAEFAARSIAFAHGIELPPFEHGAVPDIEAMLRSEEQFVEDYPNLFERPPQ	1059	352
Psy0518_AvrB2c_1	Psy0518	AvrB	AvrB	AvrB	AvrB2	15	73	57	ATGGGAAATGTTTGTTTCCGGCCTAGTAGAAGCCACGTTTCGCAAGAATTTTCTCAATCAGAATTTTCCGCAGCCAGTCCAGTCAGGACATCTGAACGCCCCTCGGATGCATCACTAGATGCTGGGCTAGAAAGCTCGAGTGCTTGTCACAGAAGCGGCCTGCGCGGTCCTGCGAAGCATTCCATGCTCAGTTTAGAAGAAATTGGCCTAGTCGGTGCTGCGCGCTGGCCAGATGATGCGCCGGGCTTAAATATTTCCAACAAAAGCAATACTCAAGAAAATAAGCGATACTGTGAAAGCTTATATCAAGCAGCACGAATTGCTGGTGGCTCCATAGCGTCTGGCAGAGTTACTAGTTTCGATGGGCTTTGGCGAAACGCAACAAAATGGCGCTTATCT…	MGNVCFRPSRSHVSQEFSQSEFSAASPVRTSERPSDASLDAGLESSSACHRSGLRGPAKHSMLSLEEIGLVGAARWPDDAPGLNISNKSNTQENKRYCESLYQAARIAGGSIASGRVTSFDGLWRNATKWRLSRILSGDASKIDFATVRMPNTRFVTSLRRPYHSVIERVRNHSDANSEIYEGEYLGGIETKVYRQHGTISSTTIPMTIVSAVADDDDIHERLKSLPKNERRHLKDLMAASHPNMITHTDAVYLPMIKDHLESLYLQAIDPSLEQHEALELIARIHWWAASAAPDRRGSAAKAEFAARSIAFAHGIELPPFEHGAVPDIEAMLRSEEQFVEDYPNLFERPPQ	1059	352
Psy0519_AvrB2c_1	Psy0519	AvrB	AvrB	AvrB	AvrB2	15	73	57	ATGGGAAATGTTTGTTTCCGGCCTAGTAGAAGCCACGTTTCGCAAGAATTTTCTCAATCAGAATTTTCCGCAGCCAGTCCAGTCAGGACATCTGAACGCCCCTCGGATGCATCACTAGATGCTGGGCTAGAAAGCTCGAGTGCTTGTCACAGAAGCGGCCTGCGCGGTCCTGCGAAGCATTCCATGCTCAGTTTAGAAGAAATTGGCCTAGTCGGTGCTGCGCGCTGGCCAGATGATGCGCCGGGCTTAAATATTTCCAACAAAAGCAATACTCAAGAAAATAAGCGATACTGTGAAAGCTTATATCAAGCAGCACGAATTGCTGGTGGCTCCATAGCGTCTGGCAGAGTTACTAGTTTCGATGGGCTTTGGCGAAACGCAACAAAATGGCGCTTATCT…	MGNVCFRPSRSHVSQEFSQSEFSAASPVRTSERPSDASLDAGLESSSACHRSGLRGPAKHSMLSLEEIGLVGAARWPDDAPGLNISNKSNTQENKRYCESLYQAARIAGGSIASGRVTSFDGLWRNATKWRLSRILSGDASKIDFATVRMPNTRFVTSLRRPYHSVIERVRNHSDANSEIYEGEYLGGIETKVYRQHGTISSTTIPMTIVSAVADDDDIHERLKSLPKNERRHLKDLMAASHPNMITHTDAVYLPMIKDHLESLYLQAIDPSLEQHEALELIARIHWWAASAAPDRRGSAAKAEFAARSIAFAHGIELPPFEHGAVPDIEAMLRSEEQFVEDYPNLFERPPQ	1059	352
Psy0520_AvrB2c_1	Psy0520	AvrB	AvrB	AvrB	AvrB2	15	73	57	ATGGGAAATGTTTGTTTCCGGCCTAGTAGAAGCCACGTTTCGCAAGAATTTTCTCAATCAGAATTTTCCGCAGCCAGTCCAGTCAGGACATCTGAACGCCCCTCGGATGCATCACTAGATGCTGGGCTAGAAAGCTCGAGTGCTTGTCACAGAAGCGGCCTGCGCGGTCCTGCGAAGCATTCCATGCTCAGTTTAGAAGAAATTGGCCTAGTCGGTGCTGCGCGCTGGCCAGATGATGCGCCGGGCTTAAATATTTCCAACAAAAGCAATACTCAAGAAAATAAGCGATACTGTGAAAGCTTATATCAAGCAGCACGAATTGCTGGTGGCTCCATAGCGTCTGGCAGAGTTACTAGTTTCGATGGGCTTTGGCGAAACGCAACAAAATGGCGCTTATCT…	MGNVCFRPSRSHVSQEFSQSEFSAASPVRTSERPSDASLDAGLESSSACHRSGLRGPAKHSMLSLEEIGLVGAARWPDDAPGLNISNKSNTQENKRYCESLYQAARIAGGSIASGRVTSFDGLWRNATKWRLSRILSGDASKIDFATVRMPNTRFVTSLRRPYHSVIERVRNHSDANSEIYEGEYLGGIETKVYRQHGTISSTTIPMTIVSAVADDDDIHERLKSLPKNERRHLKDLMAASHPNMITHTDAVYLPMIKDHLESLYLQAIDPSLEQHEALELIARIHWWAASAAPDRRGSAAKAEFAARSIAFAHGIELPPFEHGAVPDIEAMLRSEEQFVEDYPNLFERPPQ	1059	352
Psy0521_AvrB2c_1	Psy0521	AvrB	AvrB	AvrB	AvrB2	15	73	57	ATGGGAAATGTTTGTTTCCGGCCTAGTAGAAGCCACGTTTCGCAAGAATTTTCTCAATCAGAATTTTCCGCAGCCAGTCCAGTCAGGACATCTGAACGCCCCTCGGATGCATCACTAGATGCTGGGCTAGAAAGCTCGAGTGCTTGTCACAGAAGCGGCCTGCGCGGTCCTGCGAAGCATTCCATGCTCAGTTTAGAAGAAATTGGCCTAGTCGGTGCTGCGCGCTGGCCAGATGATGCGCCGGGCTTAAATATTTCCAACAAAAGCAATACTCAAGAAAATAAGCGATACTGTGAAAGCTTATATCAAGCAGCACGAATTGCTGGTGGCTCCATAGCGTCTGGCAGAGTTACTAGTTTCGATGGGCTTTGGCGAAACGCAACAAAATGGCGCTTATCT…	MGNVCFRPSRSHVSQEFSQSEFSAASPVRTSERPSDASLDAGLESSSACHRSGLRGPAKHSMLSLEEIGLVGAARWPDDAPGLNISNKSNTQENKRYCESLYQAARIAGGSIASGRVTSFDGLWRNATKWRLSRILSGDASKIDFATVRMPNTRFVTSLRRPYHSVIERVRNHSDANSEIYEGEYLGGIETKVYRQHGTISSTTIPMTIVSAVADDDDIHERLKSLPKNERRHLKDLMAASHPNMITHTDAVYLPMIKDHLESLYLQAIDPSLEQHEALELIARIHWWAASAAPDRRGSAAKAEFAARSIAFAHGIELPPFEHGAVPDIEAMLRSEEQFVEDYPNLFERPPQ	1059	352
Psy0522_AvrB2c_1	Psy0522	AvrB	AvrB	AvrB	AvrB2	15	73	57	ATGGGAAATGTTTGTTTCCGGCCTAGTAGAAGCCACGTTTCGCAAGAATTTTCTCAATCAGAATTTTCCGCAGCCAGTCCAGTCAGGACATCTGAACGCCCCTCGGATGCATCACTAGATGCTGGGCTAGAAAGCTCGAGTGCTTGTCACAGAAGCGGCCTGCGCGGTCCTGCGAAGCATTCCATGCTCAGTTTAGAAGAAATTGGCCTAGTCGGTGCTGCGCGCTGGCCAGATGATGCGCCGGGCTTAAATATTTCCAACAAAAGCAATACTCAAGAAAATAAGCGATACTGTGAAAGCTTATATCAAGCAGCACGAATTGCTGGTGGCTCCATAGCGTCTGGCAGAGTTACTAGTTTCGATGGGCTTTGGCGAAACGCAACAAAATGGCGCTTATCT…	MGNVCFRPSRSHVSQEFSQSEFSAASPVRTSERPSDASLDAGLESSSACHRSGLRGPAKHSMLSLEEIGLVGAARWPDDAPGLNISNKSNTQENKRYCESLYQAARIAGGSIASGRVTSFDGLWRNATKWRLSRILSGDASKIDFATVRMPNTRFVTSLRRPYHSVIERVRNHSDANSEIYEGEYLGGIETKVYRQHGTISSTTIPMTIVSAVADDDDIHERLKSLPKNERRHLKDLMAASHPNMITHTDAVYLPMIKDHLESLYLQAIDPSLEQHEALELIARIHWWAASAAPDRRGSAAKAEFAARSIAFAHGIELPPFEHGAVPDIEAMLRSEEQFVEDYPNLFERPPQ	1059	352
Psy0523_AvrB2c_1	Psy0523	AvrB	AvrB	AvrB	AvrB2	15	73	57	ATGGGAAATGTTTGTTTCCGGCCTAGTAGAAGCCACGTTTCGCAAGAATTTTCTCAATCAGAATTTTCCGCAGCCAGTCCAGTCAGGACATCTGAACGCCCCTCGGATGCATCACTAGATGCTGGGCTAGAAAGCTCGAGTGCTTGTCACAGAAGCGGCCTGCGCGGTCCTGCGAAGCATTCCATGCTCAGTTTAGAAGAAATTGGCCTAGTCGGTGCTGCGCGCTGGCCAGATGATGCGCCGGGCTTAAATATTTCCAACAAAAGCAATACTCAAGAAAATAAGCGATACTGTGAAAGCTTATATCAAGCAGCACGAATTGCTGGTGGCTCCATAGCGTCTGGCAGAGTTACTAGTTTCGATGGGCTTTGGCGAAACGCAACAAAATGGCGCTTATCT…	MGNVCFRPSRSHVSQEFSQSEFSAASPVRTSERPSDASLDAGLESSSACHRSGLRGPAKHSMLSLEEIGLVGAARWPDDAPGLNISNKSNTQENKRYCESLYQAARIAGGSIASGRVTSFDGLWRNATKWRLSRILSGDASKIDFATVRMPNTRFVTSLRRPYHSVIERVRNHSDANSEIYEGEYLGGIETKVYRQHGTISSTTIPMTIVSAVADDDDIHERLKSLPKNERRHLKDLMAASHPNMITHTDAVYLPMIKDHLESLYLQAIDPSLEQHEALELIARIHWWAASAAPDRRGSAAKAEFAARSIAFAHGIELPPFEHGAVPDIEAMLRSEEQFVEDYPNLFERPPQ	1059	352
Psy0524_AvrB2c_1	Psy0524	AvrB	AvrB	AvrB	AvrB2	15	73	57	ATGGGAAATGTTTGTTTCCGGCCTAGTAGAAGCCACGTTTCGCAAGAATTTTCTCAATCAGAATTTTCCGCAGCCAGTCCAGTCAGGACATCTGAACGCCCCTCGGATGCATCACTAGATGCTGGGCTAGAAAGCTCGAGTGCTTGTCACAGAAGCGGCCTGCGCGGTCCTGCGAAGCATTCCATGCTCAGTTTAGAAGAAATTGGCCTAGTCGGTGCTGCGCGCTGGCCAGATGATGCGCCGGGCTTAAATATTTCCAACAAAAGCAATACTCAAGAAAATAAGCGATACTGTGAAAGCTTATATCAAGCAGCACGAATTGCTGGTGGCTCCATAGCGTCTGGCAGAGTTACTAGTTTCGATGGGCTTTGGCGAAACGCAACAAAATGGCGCTTATCT…	MGNVCFRPSRSHVSQEFSQSEFSAASPVRTSERPSDASLDAGLESSSACHRSGLRGPAKHSMLSLEEIGLVGAARWPDDAPGLNISNKSNTQENKRYCESLYQAARIAGGSIASGRVTSFDGLWRNATKWRLSRILSGDASKIDFATVRMPNTRFVTSLRRPYHSVIERVRNHSDANSEIYEGEYLGGIETKVYRQHGTISSTTIPMTIVSAVADDDDIHERLKSLPKNERRHLKDLMAASHPNMITHTDAVYLPMIKDHLESLYLQAIDPSLEQHEALELIARIHWWAASAAPDRRGSAAKAEFAARSIAFAHGIELPPFEHGAVPDIEAMLRSEEQFVEDYPNLFERPPQ	1059	352
Psy0525_AvrB2c_1	Psy0525	AvrB	AvrB	AvrB	AvrB2	15	73	57	ATGGGAAATGTTTGTTTCCGGCCTAGTAGAAGCCACGTTTCGCAAGAATTTTCTCAATCAGAATTTTCCGCAGCCAGTCCAGTCAGGACATCTGAACGCCCCTCGGATGCATCACTAGATGCTGGGCTAGAAAGCTCGAGTGCTTGTCACAGAAGCGGCCTGCGCGGTCCTGCGAAGCATTCCATGCTCAGTTTAGAAGAAATTGGCCTAGTCGGTGCTGCGCGCTGGCCAGATGATGCGCCGGGCTTAAATATTTCCAACAAAAGCAATACTCAAGAAAATAAGCGATACTGTGAAAGCTTATATCAAGCAGCACGAATTGCTGGTGGCTCCATAGCGTCTGGCAGAGTTACTAGTTTCGATGGGCTTTGGCGAAACGCAACAAAATGGCGCTTATCT…	MGNVCFRPSRSHVSQEFSQSEFSAASPVRTSERPSDASLDAGLESSSACHRSGLRGPAKHSMLSLEEIGLVGAARWPDDAPGLNISNKSNTQENKRYCESLYQAARIAGGSIASGRVTSFDGLWRNATKWRLSRILSGDASKIDFATVRMPNTRFVTSLRRPYHSVIERVRNHSDANSEIYEGEYLGGIETKVYRQHGTISSTTIPMTIVSAVADDDDIHERLKSLPKNERRHLKDLMAASHPNMITHTDAVYLPMIKDHLESLYLQAIDPSLEQHEALELIARIHWWAASAAPDRRGSAAKAEFAARSIAFAHGIELPPFEHGAVPDIEAMLRSEEQFVEDYPNLFERPPQ	1059	352
Psy0526_AvrB2c_1	Psy0526	AvrB	AvrB	AvrB	AvrB2	15	73	57	ATGGGAAATGTTTGTTTCCGGCCTAGTAGAAGCCACGTTTCGCAAGAATTTTCTCAATCAGAATTTTCCGCAGCCAGTCCAGTCAGGACATCTGAACGCCCCTCGGATGCATCACTAGATGCTGGGCTAGAAAGCTCGAGTGCTTGTCACAGAAGCGGCCTGCGCGGTCCTGCGAAGCATTCCATGCTCAGTTTAGAAGAAATTGGCCTAGTCGGTGCTGCGCGCTGGCCAGATGATGCGCCGGGCTTAAATATTTCCAACAAAAGCAATACTCAAGAAAATAAGCGATACTGTGAAAGCTTATATCAAGCAGCACGAATTGCTGGTGGCTCCATAGCGTCTGGCAGAGTTACTAGTTTCGATGGGCTTTGGCGAAACGCAACAAAATGGCGCTTATCT…	MGNVCFRPSRSHVSQEFSQSEFSAASPVRTSERPSDASLDAGLESSSACHRSGLRGPAKHSMLSLEEIGLVGAARWPDDAPGLNISNKSNTQENKRYCESLYQAARIAGGSIASGRVTSFDGLWRNATKWRLSRILSGDASKIDFATVRMPNTRFVTSLRRPYHSVIERVRNHSDANSEIYEGEYLGGIETKVYRQHGTISSTTIPMTIVSAVADDDDIHERLKSLPKNERRHLKDLMAASHPNMITHTDAVYLPMIKDHLESLYLQAIDPSLEQHEALELIARIHWWAASAAPDRRGSAAKAEFAARSIAFAHGIELPPFEHGAVPDIEAMLRSEEQFVEDYPNLFERPPQ	1059	352
Psy0527_AvrB2c_1	Psy0527	AvrB	AvrB	AvrB	AvrB2	15	73	57	ATGGGAAATGTTTGTTTCCGGCCTAGTAGAAGCCACGTTTCGCAAGAATTTTCTCAATCAGAATTTTCCGCAGCCAGTCCAGTCAGGACATCTGAACGCCCCTCGGATGCATCACTAGATGCTGGGCTAGAAAGCTCGAGTGCTTGTCACAGAAGCGGCCTGCGCGGTCCTGCGAAGCATTCCATGCTCAGTTTAGAAGAAATTGGCCTAGTCGGTGCTGCGCGCTGGCCAGATGATGCGCCGGGCTTAAATATTTCCAACAAAAGCAATACTCAAGAAAATAAGCGATACTGTGAAAGCTTATATCAAGCAGCACGAATTGCTGGTGGCTCCATAGCGTCTGGCAGAGTTACTAGTTTCGATGGGCTTTGGCGAAACGCAACAAAATGGCGCTTATCT…	MGNVCFRPSRSHVSQEFSQSEFSAASPVRTSERPSDASLDAGLESSSACHRSGLRGPAKHSMLSLEEIGLVGAARWPDDAPGLNISNKSNTQENKRYCESLYQAARIAGGSIASGRVTSFDGLWRNATKWRLSRILSGDASKIDFATVRMPNTRFVTSLRRPYHSVIERVRNHSDANSEIYEGEYLGGIETKVYRQHGTISSTTIPMTIVSAVADDDDIHERLKSLPKNERRHLKDLMAASHPNMITHTDAVYLPMIKDHLESLYLQAIDPSLEQHEALELIARIHWWAASAAPDRRGSAAKAEFAARSIAFAHGIELPPFEHGAVPDIEAMLRSEEQFVEDYPNLFERPPQ	1059	352
Psy0528_AvrB2c_1	Psy0528	AvrB	AvrB	AvrB	AvrB2	15	73	57	ATGGGAAATGTTTGTTTCCGGCCTAGTAGAAGCCACGTTTCGCAAGAATTTTCTCAATCAGAATTTTCCGCAGCCAGTCCAGTCAGGACATCTGAACGCCCCTCGGATGCATCACTAGATGCTGGGCTAGAAAGCTCGAGTGCTTGTCACAGAAGCGGCCTGCGCGGTCCTGCGAAGCATTCCATGCTCAGTTTAGAAGAAATTGGCCTAGTCGGTGCTGCGCGCTGGCCAGATGATGCGCCGGGCTTAAATATTTCCAACAAAAGCAATACTCAAGAAAATAAGCGATACTGTGAAAGCTTATATCAAGCAGCACGAATTGCTGGTGGCTCCATAGCGTCTGGCAGAGTTACTAGTTTCGATGGGCTTTGGCGAAACGCAACAAAATGGCGCTTATCT…	MGNVCFRPSRSHVSQEFSQSEFSAASPVRTSERPSDASLDAGLESSSACHRSGLRGPAKHSMLSLEEIGLVGAARWPDDAPGLNISNKSNTQENKRYCESLYQAARIAGGSIASGRVTSFDGLWRNATKWRLSRILSGDASKIDFATVRMPNTRFVTSLRRPYHSVIERVRNHSDANSEIYEGEYLGGIETKVYRQHGTISSTTIPMTIVSAVADDDDIHERLKSLPKNERRHLKDLMAASHPNMITHTDAVYLPMIKDHLESLYLQAIDPSLEQHEALELIARIHWWAASAAPDRRGSAAKAEFAARSIAFAHGIELPPFEHGAVPDIEAMLRSEEQFVEDYPNLFERPPQ	1059	352
Psy0530_AvrB2c_1	Psy0530	AvrB	AvrB	AvrB	AvrB2	15	73	57	ATGGGAAATGTTTGTTTCCGGCCTAGTAGAAGCCACGTTTCGCAAGAATTTTCTCAATCAGAATTTTCCGCAGCCAGTCCAGTCAGGACATCTGAACGCCCCTCGGATGCATCACTAGATGCTGGGCTAGAAAGCTCGAGTGCTTGTCACAGAAGCGGCCTGCGCGGTCCTGCGAAGCATTCCATGCTCAGTTTAGAAGAAATTGGCCTAGTCGGTGCTGCGCGCTGGCCAGATGATGCGCCGGGCTTAAATATTTCCAACAAAAGCAATACTCAAGAAAATAAGCGATACTGTGAAAGCTTATATCAAGCAGCACGAATTGCTGGTGGCTCCATAGCGTCTGGCAGAGTTACTAGTTTCGATGGGCTTTGGCGAAACGCAACAAAATGGCGCTTATCT…	MGNVCFRPSRSHVSQEFSQSEFSAASPVRTSERPSDASLDAGLESSSACHRSGLRGPAKHSMLSLEEIGLVGAARWPDDAPGLNISNKSNTQENKRYCESLYQAARIAGGSIASGRVTSFDGLWRNATKWRLSRILSGDASKIDFATVRMPNTRFVTSLRRPYHSVIERVRNHSDANSEIYEGEYLGGIETKVYRQHGTISSTTIPMTIVSAVADDDDIHERLKSLPKNERRHLKDLMAASHPNMITHTDAVYLPMIKDHLESLYLQAIDPSLEQHEALELIARIHWWAASAAPDRRGSAAKAEFAARSIAFAHGIELPPFEHGAVPDIEAMLRSEEQFVEDYPNLFERPPQ	1059	352
Psy0531_AvrB2c_1	Psy0531	AvrB	AvrB	AvrB	AvrB2	15	73	57	ATGGGAAATGTTTGTTTCCGGCCTAGTAGAAGCCACGTTTCGCAAGAATTTTCTCAATCAGAATTTTCCGCAGCCAGTCCAGTCAGGACATCTGAACGCCCCTCGGATGCATCACTAGATGCTGGGCTAGAAAGCTCGAGTGCTTGTCACAGAAGCGGCCTGCGCGGTCCTGCGAAGCATTCCATGCTCAGTTTAGAAGAAATTGGCCTAGTCGGTGCTGCGCGCTGGCCAGATGATGCGCCGGGCTTAAATATTTCCAACAAAAGCAATACTCAAGAAAATAAGCGATACTGTGAAAGCTTATATCAAGCAGCACGAATTGCTGGTGGCTCCATAGCGTCTGGCAGAGTTACTAGTTTCGATGGGCTTTGGCGAAACGCAACAAAATGGCGCTTATCT…	MGNVCFRPSRSHVSQEFSQSEFSAASPVRTSERPSDASLDAGLESSSACHRSGLRGPAKHSMLSLEEIGLVGAARWPDDAPGLNISNKSNTQENKRYCESLYQAARIAGGSIASGRVTSFDGLWRNATKWRLSRILSGDASKIDFATVRMPNTRFVTSLRRPYHSVIERVRNHSDANSEIYEGEYLGGIETKVYRQHGTISSTTIPMTIVSAVADDDDIHERLKSLPKNERRHLKDLMAASHPNMITHTDAVYLPMIKDHLESLYLQAIDPSLEQHEALELIARIHWWAASAAPDRRGSAAKAEFAARSIAFAHGIELPPFEHGAVPDIEAMLRSEEQFVEDYPNLFERPPQ	1059	352
Psy0532_AvrB2c_1	Psy0532	AvrB	AvrB	AvrB	AvrB2	15	73	57	ATGGGAAATGTTTGTTTCCGGCCTAGTAGAAGCCACGTTTCGCAAGAATTTTCTCAATCAGAATTTTCCGCAGCCAGTCCAGTCAGGACATCTGAACGCCCCTCGGATGCATCACTAGATGCTGGGCTAGAAAGCTCGAGTGCTTGTCACAGAAGCGGCCTGCGCGGTCCTGCGAAGCATTCCATGCTCAGTTTAGAAGAAATTGGCCTAGTCGGTGCTGCGCGCTGGCCAGATGATGCGCCGGGCTTAAATATTTCCAACAAAAGCAATACTCAAGAAAATAAGCGATACTGTGAAAGCTTATATCAAGCAGCACGAATTGCTGGTGGCTCCATAGCGTCTGGCAGAGTTACTAGTTTCGATGGGCTTTGGCGAAACGCAACAAAATGGCGCTTATCT…	MGNVCFRPSRSHVSQEFSQSEFSAASPVRTSERPSDASLDAGLESSSACHRSGLRGPAKHSMLSLEEIGLVGAARWPDDAPGLNISNKSNTQENKRYCESLYQAARIAGGSIASGRVTSFDGLWRNATKWRLSRILSGDASKIDFATVRMPNTRFVTSLRRPYHSVIERVRNHSDANSEIYEGEYLGGIETKVYRQHGTISSTTIPMTIVSAVADDDDIHERLKSLPKNERRHLKDLMAASHPNMITHTDAVYLPMIKDHLESLYLQAIDPSLEQHEALELIARIHWWAASAAPDRRGSAAKAEFAARSIAFAHGIELPPFEHGAVPDIEAMLRSEEQFVEDYPNLFERPPQ	1059	352
Psy0535_AvrB2c_1	Psy0535	AvrB	AvrB	AvrB	AvrB2	15	73	57	ATGGGAAATGTTTGTTTCCGGCCTAGTAGAAGCCACGTTTCGCAAGAATTTTCTCAATCAGAATTTTCCGCAGCCAGTCCAGTCAGGACATCTGAACGCCCCTCGGATGCATCACTAGATGCTGGGCTAGAAAGCTCGAGTGCTTGTCACAGAAGCGGCCTGCGCGGTCCTGCGAAGCATTCCATGCTCAGTTTAGAAGAAATTGGCCTAGTCGGTGCTGCGCGCTGGCCAGATGATGCGCCGGGCTTAAATATTTCCAACAAAAGCAATACTCAAGAAAATAAGCGATACTGTGAAAGCTTATATCAAGCAGCACGAATTGCTGGTGGCTCCATAGCGTCTGGCAGAGTTACTAGTTTCGATGGGCTTTGGCGAAACGCAACAAAATGGCGCTTATCT…	MGNVCFRPSRSHVSQEFSQSEFSAASPVRTSERPSDASLDAGLESSSACHRSGLRGPAKHSMLSLEEIGLVGAARWPDDAPGLNISNKSNTQENKRYCESLYQAARIAGGSIASGRVTSFDGLWRNATKWRLSRILSGDASKIDFATVRMPNTRFVTSLRRPYHSVIERVRNHSDANSEIYEGEYLGGIETKVYRQHGTISSTTIPMTIVSAVADDDDIHERLKSLPKNERRHLKDLMAASHPNMITHTDAVYLPMIKDHLESLYLQAIDPSLEQHEALELIARIHWWAASAAPDRRGSAAKAEFAARSIAFAHGIELPPFEHGAVPDIEAMLRSEEQFVEDYPNLFERPPQ	1059	352
PsyICMP4909_AvrB2c_1	PsyICMP4909	AvrB	AvrB	AvrB	AvrB2	15	73	57	ATGGGAAATGTTTGTTTCCGGCCTAGTAGAAGCCACGTTTCGCAAGAATTTTCTCAATCAGAATTTTCCGCAGCCAGTCCAGTCAGGACATCTGAACGCCCCTCGGATGCATCACTAGATGCTGGGCTAGAAAGCTCGAGTGCTTGTCACAGAAGCGGCCTGCGCGGTCCTGCGAAGCATTCCATGCTCAGTTTAGAAGAAATTGGCCTAGTCGGTGCTGCGCGCTGGCCAGATGATGCGCCGGGCTTAAATATTTCCAACAAAAGCAATACTCAAGAAAATAAGCGATACTGTGAAAGCTTATATCAAGCAGCACGAATTGCTGGTGGCTCCATAGCGTCTGGCAGAGTTACTAGTTTCGATGGGCTTTGGCGAAACGCAACAAAATGGCGCTTATCT…	MGNVCFRPSRSHVSQEFSQSEFSAASPVRTSERPSDASLDAGLESSSACHRSGLRGPAKHSMLSLEEIGLVGAARWPDDAPGLNISNKSNTQENKRYCESLYQAARIAGGSIASGRVTSFDGLWRNATKWRLSRILSGDASKIDFATVRMPNTRFVTSLRRPYHSVIERVRNHSDANSEIYEGEYLGGIETKVYRQHGTISSTTIPMTIVSAVADDDDIHERLKSLPKNERRHLKDLMAASHPNMITHTDAVYLPMIKDHLESLYLQAIDPSLEQHEALELIARIHWWAASAAPDRRGSAAKAEFAARSIAFAHGIELPPFEHGAVPDIEAMLRSEEQFVEDYPNLFERPPQ	1059	352
PfrICMP9129_AvrB2c_1	PfrICMP9129	AvrB	AvrB	AvrB	AvrB2	15	73	58	ATGGGAAATGTTTGTTTCCGGCCTAGTAGAAGCCACGTTTCGCGAGAATTTTCTCAATCAGAATTTTCCGCAACCAGTCCAGTCAGGACATCTGAACGCCCCTCGGATGCATCACTAGATGCTGGGCTAGAAAGCTCGAGTGCTTGTCACAGAAGCGGCCTGCGCGGTCCTGCGAAGCATTCCATGCTCAGTTTAGAAGAAATTGGCCTAGTCGGTGCTGCGCGCTGGCCAGATGATGCGCCGGGCTTAAATATTTCCAACAAAAGCAATACGCAAGAAAATAAGCGATATTGTGAAAGCTTATATCAAGCAGCACGAATTGCTGGTGGCTCCATAGCGTCTGGCAGAGTTACTAGTTTCGATGGGCTTTGGCGAAACGCAACAAAATGGCGCTTATCT…	MGNVCFRPSRSHVSREFSQSEFSATSPVRTSERPSDASLDAGLESSSACHRSGLRGPAKHSMLSLEEIGLVGAARWPDDAPGLNISNKSNTQENKRYCESLYQAARIAGGSIASGRVTSFDGLWRNATKWRLSRILSGDASKIDFATIRMPNTRFVTSLSRPYHSVIERVRNHSDANSEIYEGEYLGGIETKVYRQHGTISSTTIPMTVVSAVADDDDIHERLKSLPKNERRHLKDLMAASHPNMITHTDAVYLPMIKDHLESLYLQAIDPSLEQHEALELIARIHWWAASAAPDRRGSAAKAEFAARSIAFAHGIELPPFEHGAVPDIEAMLRSEEQFVEDYPNLFERSPQ	1059	352
PgyICMP9589_AvrB2c_1	PgyICMP9589	AvrB	AvrB	AvrB	AvrB2	15	73	59	ATGGGAAATGTTTGTTTCCGGCCTAGTAGAAGCCACGTTTCGCAAGAATTTTCTCAATCAGAATTTTCCACAGCCAGTCCAGTCAGGACATCTGAACGACCCTCGGATGCATCACTAGATGCTGGGCTAGAAAGCTCGAGTGCTTGTCACAGAAGCGGCCTGCGCGGTCCTGCGAAGCATTCCATGCTCAGTTTAGACGAAATTGGCCTAGTCGGTGCTGCGCGCTGGCCAGATGATGCGCCGGGCTTAAATATTTCCAACAAAAGCAATACGCAAGAAAATAAGCGATACTGTGAAAGCTTATATCAAGCAGCACGAATTGCTGGTGGCTCCATAGCGTCTGGCAGAGTTACTAGTTTCGATGGGCTTTGGCGAAACGCAACAAAATGGCGCTTATCT…	MGNVCFRPSRSHVSQEFSQSEFSTASPVRTSERPSDASLDAGLESSSACHRSGLRGPAKHSMLSLDEIGLVGAARWPDDAPGLNISNKSNTQENKRYCESLYQAARIAGGSIASGRVTSFDGLWRNATKWRLSRILSGDASKIDFATVRMPNTRFVTSLRRPYHSVIERVRNHSDANSEIYEGEYLGGIETKVYRQHGTISSTTIPMTIVSAVADDDDIHERLKSLPKNERRHLKDLMAASHPNMITHTDAVYLPMIKDHLESLYLQAIDPSLEQHEALELIARIHWWAASAAPDRRGSAAKAEFAARSIAFAHGIELPPFEHGAVPDIEAMLRSEEQFVEDYPNLFERPPQ	1059	352
PphK4_AvrB2c_1	PphK4	AvrB	AvrB	AvrB	AvrB2	15	73	60	ATGGGAAATGTTTGTTTCCGGCCTAGTAGAAGCCACGTTTCGCAAGAATTTTCTCAATCAGAATTTTCCGCAGCCAGTCCAGTCAGGATATCTGAACGCCCCTCGGATGCATCACTAGATGCTGGGCTAGAAAGCTCGAGTGCTTGTCACAGAAGCGGCCTGCGTGGTCCTGCGAAGCATTCCATGCTCAGTTTAGAAGAAATTGGCCTAGTCGGTGCTGCGCGCTGGCCAGATGATGCGCCGGGCTTAAATATTTCCAACAAAAGCAATACTCAAGAAAATAAGCGATACTGTGAAAGCTTATATCAAGCAGCACGAATTGCTGGTGGCTCCATAGCGTCTAGCAGAGTTACTAGTTTCGATGGGCTTTGGCGAAACGCAACAAAATGGCGCTTATCT…	MGNVCFRPSRSHVSQEFSQSEFSAASPVRISERPSDASLDAGLESSSACHRSGLRGPAKHSMLSLEEIGLVGAARWPDDAPGLNISNKSNTQENKRYCESLYQAARIAGGSIASSRVTSFDGLWRNATKWRLSRILSGDASKIDFATVRMPNTRFVTSLRRPYHSVIERVRNHSDANSEIYEGEYLGGIETKVYRQHGTISSTTIPMTIVSAVADDDDIHERLKSLPKNERRHLKDLMAASHPNMITHTDAVYLPMIKDHLESLYLQAIDPSLEQHEALELIARIHWWAASAAPDRRGSAAKAEFAARSIAFAHGIELPPFEHGAVPDIEAMLRSEEQFVEDYPNLFERPPQ	1059	352
PphY5_2_AvrB2c_1	PphY5_2	AvrB	AvrB	AvrB	AvrB2	15	73	60	ATGGGAAATGTTTGTTTCCGGCCTAGTAGAAGCCACGTTTCGCAAGAATTTTCTCAATCAGAATTTTCCGCAGCCAGTCCAGTCAGGATATCTGAACGCCCCTCGGATGCATCACTAGATGCTGGGCTAGAAAGCTCGAGTGCTTGTCACAGAAGCGGCCTGCGTGGTCCTGCGAAGCATTCCATGCTCAGTTTAGAAGAAATTGGCCTAGTCGGTGCTGCGCGCTGGCCAGATGATGCGCCGGGCTTAAATATTTCCAACAAAAGCAATACTCAAGAAAATAAGCGATACTGTGAAAGCTTATATCAAGCAGCACGAATTGCTGGTGGCTCCATAGCGTCTAGCAGAGTTACTAGTTTCGATGGGCTTTGGCGAAACGCAACAAAATGGCGCTTATCT…	MGNVCFRPSRSHVSQEFSQSEFSAASPVRISERPSDASLDAGLESSSACHRSGLRGPAKHSMLSLEEIGLVGAARWPDDAPGLNISNKSNTQENKRYCESLYQAARIAGGSIASSRVTSFDGLWRNATKWRLSRILSGDASKIDFATVRMPNTRFVTSLRRPYHSVIERVRNHSDANSEIYEGEYLGGIETKVYRQHGTISSTTIPMTIVSAVADDDDIHERLKSLPKNERRHLKDLMAASHPNMITHTDAVYLPMIKDHLESLYLQAIDPSLEQHEALELIARIHWWAASAAPDRRGSAAKAEFAARSIAFAHGIELPPFEHGAVPDIEAMLRSEEQFVEDYPNLFERPPQ	1059	352
Pav013_AvrB2d_1	Pav013	AvrB	AvrB	AvrB	AvrB2	15	73	61	ATGGGTTGCGTATCGTCAAAAGCATCTGTCATTTCTTCGGACAGTTTTCGCGCATCATATACAAGCTCTCCAGAGGTATCCTCTGTCCATCAACGAGCCAGGACGCCAAGGTGCGGTGAGCTTCAGGGGCCCCAAGTGAGCAGATTGATGCCTTACCAGCAGGCGTTAGTAGGTGTGGCCCGATGGCCTGATCCGCATTTTAACAGGGACGATGCGCCCCACCAGATGGAGTATGGAGAATCGTTCTACCATAAAAGCCGAGAGCTTGGTGCGTCGGTCGCCAATGGAGAGATAGAAACGTTTCAGGAGCTCTGGAGTGAAGCTCGTGATTGGAGAGCTTCCAGAGCAGGCCAAGATGCTCGACTTTTTAGTTCATCGCGTGATCCCAACTCTTCACGG…	MGCVSSKASVISSDSFRASYTSSPEVSSVHQRARTPRCGELQGPQVSRLMPYQQALVGVARWPDPHFNRDDAPHQMEYGESFYHKSRELGASVANGEIETFQELWSEARDWRASRAGQDARLFSSSRDPNSSRAFVTPITGPYEFLKDRFANRKDGEKHKMLDFLPHSNTFRFHGKIDGERLPLTWISISSDRHADRTKDPYQRLRNQGMNDVGEPNVMLHTQAEYVPKIMQHVEHLYKAATDAALSDANALKKLAEIHWWTVQAVPDFRGSAAKAELCVRSIAQARGMDLPPMRLGIVPDLEALTMPLKDFVKSYQGFFENN	972	323
Pav037_AvrB2d_1	Pav037	AvrB	AvrB	AvrB	AvrB2	15	73	61	ATGGGTTGCGTATCGTCAAAAGCATCTGTCATTTCTTCGGACAGTTTTCGCGCATCATATACAAGCTCTCCAGAGGTATCCTCTGTCCATCAACGAGCCAGGACGCCAAGGTGCGGTGAGCTTCAGGGGCCCCAAGTGAGCAGATTGATGCCTTACCAGCAGGCGTTAGTAGGTGTGGCCCGATGGCCTGATCCGCATTTTAACAGGGACGATGCGCCCCACCAGATGGAGTATGGAGAATCGTTCTACCATAAAAGCCGAGAGCTTGGTGCGTCGGTCGCCAATGGAGAGATAGAAACGTTTCAGGAGCTCTGGAGTGAAGCTCGTGATTGGAGAGCTTCCAGAGCAGGCCAAGATGCTCGACTTTTTAGTTCATCGCGTGATCCCAACTCTTCACGG…	MGCVSSKASVISSDSFRASYTSSPEVSSVHQRARTPRCGELQGPQVSRLMPYQQALVGVARWPDPHFNRDDAPHQMEYGESFYHKSRELGASVANGEIETFQELWSEARDWRASRAGQDARLFSSSRDPNSSRAFVTPITGPYEFLKDRFANRKDGEKHKMLDFLPHSNTFRFHGKIDGERLPLTWISISSDRHADRTKDPYQRLRNQGMNDVGEPNVMLHTQAEYVPKIMQHVEHLYKAATDAALSDANALKKLAEIHWWTVQAVPDFRGSAAKAELCVRSIAQARGMDLPPMRLGIVPDLEALTMPLKDFVKSYQGFFENN	972	323
PlpICMP3946_AvrB2d_1	PlpICMP3946	AvrB	AvrB	AvrB	AvrB2	15	73	62	ATGGGTTGCGTATCGTCAAAAGCATCTGTCATTTCTTCGGACAGTTTTCGCGCATCATATACAAGCTCTCCAGAGGTATCCTCTGTCCATCAACGAGCCAGGACGCCAAGGTGCGGTGAGCTTCAGGGGCCCCAAGTGAGCAGATTGATGCCTTACCAGCAGGCGTTAGTAGGTGTGGCCCGATGGCCTGATCCGCATTTTAACAGGGACGATGCGCCCCACCAGATGGAGTATGGAGAATCGTTCTACCATAAAAGCCGAGAGCTTGGTGCGTCGGTCGCCAATGGGGAGATAGAAACGTTTCAGGAGCTCTGGAGTGAAGCTCGTGATTGGAGAGCTTCCAGAGCAGGCCAAGATGCTCGACTTTTTAGTTCATCGCGTGATCCCAACTCTTCACGG…	MGCVSSKASVISSDSFRASYTSSPEVSSVHQRARTPRCGELQGPQVSRLMPYQQALVGVARWPDPHFNRDDAPHQMEYGESFYHKSRELGASVANGEIETFQELWSEARDWRASRAGQDARLFSSSRDPNSSRAFVTPITGPYEFLKDRFANRKDGEKHKMLDFLPHSNTFRFHGKIDGERLPLTWISISSDRHADRTKDPYQRLRNQGMNDVGEPNVMLHTQAEYVPKIMQHVEHLYKAATDAALSDANALKKLAEIHWWTVQAVPDFRGSAAKAELCVRSIAQARGMDLPPMRLGIVPDLEALTMPLKDFVKSYQGFFENN	972	323
PlpICMP3947_AvrB2d_1	PlpICMP3947	AvrB	AvrB	AvrB	AvrB2	15	73	62	ATGGGTTGCGTATCGTCAAAAGCATCTGTCATTTCTTCGGACAGTTTTCGCGCATCATATACAAGCTCTCCAGAGGTATCCTCTGTCCATCAACGAGCCAGGACGCCAAGGTGCGGTGAGCTTCAGGGGCCCCAAGTGAGCAGATTGATGCCTTACCAGCAGGCGTTAGTAGGTGTGGCCCGATGGCCTGATCCGCATTTTAACAGGGACGATGCGCCCCACCAGATGGAGTATGGAGAATCGTTCTACCATAAAAGCCGAGAGCTTGGTGCGTCGGTCGCCAATGGGGAGATAGAAACGTTTCAGGAGCTCTGGAGTGAAGCTCGTGATTGGAGAGCTTCCAGAGCAGGCCAAGATGCTCGACTTTTTAGTTCATCGCGTGATCCCAACTCTTCACGG…	MGCVSSKASVISSDSFRASYTSSPEVSSVHQRARTPRCGELQGPQVSRLMPYQQALVGVARWPDPHFNRDDAPHQMEYGESFYHKSRELGASVANGEIETFQELWSEARDWRASRAGQDARLFSSSRDPNSSRAFVTPITGPYEFLKDRFANRKDGEKHKMLDFLPHSNTFRFHGKIDGERLPLTWISISSDRHADRTKDPYQRLRNQGMNDVGEPNVMLHTQAEYVPKIMQHVEHLYKAATDAALSDANALKKLAEIHWWTVQAVPDFRGSAAKAELCVRSIAQARGMDLPPMRLGIVPDLEALTMPLKDFVKSYQGFFENN	972	323
PlpICMP8813_AvrB2d_1	PlpICMP8813	AvrB	AvrB	AvrB	AvrB2	15	73	62	ATGGGTTGCGTATCGTCAAAAGCATCTGTCATTTCTTCGGACAGTTTTCGCGCATCATATACAAGCTCTCCAGAGGTATCCTCTGTCCATCAACGAGCCAGGACGCCAAGGTGCGGTGAGCTTCAGGGGCCCCAAGTGAGCAGATTGATGCCTTACCAGCAGGCGTTAGTAGGTGTGGCCCGATGGCCTGATCCGCATTTTAACAGGGACGATGCGCCCCACCAGATGGAGTATGGAGAATCGTTCTACCATAAAAGCCGAGAGCTTGGTGCGTCGGTCGCCAATGGGGAGATAGAAACGTTTCAGGAGCTCTGGAGTGAAGCTCGTGATTGGAGAGCTTCCAGAGCAGGCCAAGATGCTCGACTTTTTAGTTCATCGCGTGATCCCAACTCTTCACGG…	MGCVSSKASVISSDSFRASYTSSPEVSSVHQRARTPRCGELQGPQVSRLMPYQQALVGVARWPDPHFNRDDAPHQMEYGESFYHKSRELGASVANGEIETFQELWSEARDWRASRAGQDARLFSSSRDPNSSRAFVTPITGPYEFLKDRFANRKDGEKHKMLDFLPHSNTFRFHGKIDGERLPLTWISISSDRHADRTKDPYQRLRNQGMNDVGEPNVMLHTQAEYVPKIMQHVEHLYKAATDAALSDANALKKLAEIHWWTVQAVPDFRGSAAKAELCVRSIAQARGMDLPPMRLGIVPDLEALTMPLKDFVKSYQGFFENN	972	323
Pph1449B_AvrB2d_1	Pph1449B	AvrB	AvrB	AvrB	AvrB2	15	73	63	ATGGGTTGCGTATCGTCAAAAGCATCTGTCATTTCTTCGGACAGCTTTCGCGCATCATATACAAACTCTCCAGAGGTATCCTCTGTCCATCAACGAGCCAGGACGCCAAGGTGCGGTGAGCTTCAGGGGCCCCAAGTGAGCAGATTGATGCCTTACCAGCAGGCGTTAGTAGGTGTGGCCCGATGGCCTGATCCGTATTTTAACAGGGACGATGCGCCCCACCAGATGGAGTATGGAGAATCGTTCTACCATAAAAGCCGAGAGCTTGGTGCGTCGGTCGCCAATGGAGAGATAGAAACGTTTCAGGAGCTCTGGAGTGAAGCTCGTGATTGGAGAGCTTCCAGAGCAGGCCAAGATGCTCGACTTTTTAGTTCATCGCGTGATCCCAACTCTTCACGG…	MGCVSSKASVISSDSFRASYTNSPEVSSVHQRARTPRCGELQGPQVSRLMPYQQALVGVARWPDPYFNRDDAPHQMEYGESFYHKSRELGASVANGEIETFQELWSEARDWRASRAGQDARLFSSSRDPNSSRAFVTPITGPYEFLKDRFANRKDGEKDKMLDFLPHSNTFRFHGKIDGERLPLTWISISSDRHADRTKDPYQRLRDQGMNDVGEPNVMLHTQAEYVPKIMQHVEHLYKAATDAALSDANALKKLAEIHWRTVQAVPDFRGSAAKAELCVRSIAQARGMDLPPMRLGIVPDLEALTMPLKDFVKSYQGFFEHN	972	323
Ppi895A_AvrB2d_1	Ppi895A	AvrB	AvrB	AvrB	AvrB2	15	73	63	ATGGGTTGCGTATCGTCAAAAGCATCTGTCATTTCTTCGGACAGCTTTCGCGCATCATATACAAACTCTCCAGAGGTATCCTCTGTCCATCAACGAGCCAGGACGCCAAGGTGCGGTGAGCTTCAGGGGCCCCAAGTGAGCAGATTGATGCCTTACCAGCAGGCGTTAGTAGGTGTGGCCCGATGGCCTGATCCGTATTTTAACAGGGACGATGCGCCCCACCAGATGGAGTATGGAGAATCGTTCTACCATAAAAGCCGAGAGCTTGGTGCGTCGGTCGCCAATGGAGAGATAGAAACGTTTCAGGAGCTCTGGAGTGAAGCTCGTGATTGGAGAGCTTCCAGAGCAGGCCAAGATGCTCGACTTTTTAGTTCATCGCGTGATCCCAACTCTTCACGG…	MGCVSSKASVISSDSFRASYTNSPEVSSVHQRARTPRCGELQGPQVSRLMPYQQALVGVARWPDPYFNRDDAPHQMEYGESFYHKSRELGASVANGEIETFQELWSEARDWRASRAGQDARLFSSSRDPNSSRAFVTPITGPYEFLKDRFANRKDGEKDKMLDFLPHSNTFRFHGKIDGERLPLTWISISSDRHADRTKDPYQRLRDQGMNDVGEPNVMLHTQAEYVPKIMQHVEHLYKAATDAALSDANALKKLAEIHWRTVQAVPDFRGSAAKAELCVRSIAQARGMDLPPMRLGIVPDLEALTMPLKDFVKSYQGFFEHN	972	323
PpiICMP2788_AvrB2d_1	PpiICMP2788	AvrB	AvrB	AvrB	AvrB2	15	73	63	ATGGGTTGCGTATCGTCAAAAGCATCTGTCATTTCTTCGGACAGCTTTCGCGCATCATATACAAACTCTCCAGAGGTATCCTCTGTCCATCAACGAGCCAGGACGCCAAGGTGCGGTGAGCTTCAGGGGCCCCAAGTGAGCAGATTGATGCCTTACCAGCAGGCGTTAGTAGGTGTGGCCCGATGGCCTGATCCGTATTTTAACAGGGACGATGCGCCCCACCAGATGGAGTATGGAGAATCGTTCTACCATAAAAGCCGAGAGCTTGGTGCGTCGGTCGCCAATGGAGAGATAGAAACGTTTCAGGAGCTCTGGAGTGAAGCTCGTGATTGGAGAGCTTCCAGAGCAGGCCAAGATGCTCGACTTTTTAGTTCATCGCGTGATCCCAACTCTTCACGG…	MGCVSSKASVISSDSFRASYTNSPEVSSVHQRARTPRCGELQGPQVSRLMPYQQALVGVARWPDPYFNRDDAPHQMEYGESFYHKSRELGASVANGEIETFQELWSEARDWRASRAGQDARLFSSSRDPNSSRAFVTPITGPYEFLKDRFANRKDGEKDKMLDFLPHSNTFRFHGKIDGERLPLTWISISSDRHADRTKDPYQRLRDQGMNDVGEPNVMLHTQAEYVPKIMQHVEHLYKAATDAALSDANALKKLAEIHWRTVQAVPDFRGSAAKAELCVRSIAQARGMDLPPMRLGIVPDLEALTMPLKDFVKSYQGFFEHN	972	323
PpiICMP4433_AvrB2d_1	PpiICMP4433	AvrB	AvrB	AvrB	AvrB2	15	73	63	ATGGGTTGCGTATCGTCAAAAGCATCTGTCATTTCTTCGGACAGCTTTCGCGCATCATATACAAACTCTCCAGAGGTATCCTCTGTCCATCAACGAGCCAGGACGCCAAGGTGCGGTGAGCTTCAGGGGCCCCAAGTGAGCAGATTGATGCCTTACCAGCAGGCGTTAGTAGGTGTGGCCCGATGGCCTGATCCGTATTTTAACAGGGACGATGCGCCCCACCAGATGGAGTATGGAGAATCGTTCTACCATAAAAGCCGAGAGCTTGGTGCGTCGGTCGCCAATGGAGAGATAGAAACGTTTCAGGAGCTCTGGAGTGAAGCTCGTGATTGGAGAGCTTCCAGAGCAGGCCAAGATGCTCGACTTTTTAGTTCATCGCGTGATCCCAACTCTTCACGG…	MGCVSSKASVISSDSFRASYTNSPEVSSVHQRARTPRCGELQGPQVSRLMPYQQALVGVARWPDPYFNRDDAPHQMEYGESFYHKSRELGASVANGEIETFQELWSEARDWRASRAGQDARLFSSSRDPNSSRAFVTPITGPYEFLKDRFANRKDGEKDKMLDFLPHSNTFRFHGKIDGERLPLTWISISSDRHADRTKDPYQRLRDQGMNDVGEPNVMLHTQAEYVPKIMQHVEHLYKAATDAALSDANALKKLAEIHWRTVQAVPDFRGSAAKAELCVRSIAQARGMDLPPMRLGIVPDLEALTMPLKDFVKSYQGFFEHN	972	323
Psy0555_AvrB2d_1	Psy0555	AvrB	AvrB	AvrB	AvrB2	15	73	63	ATGGGTTGCGTATCGTCAAAAGCATCTGTCATTTCTTCGGACAGCTTTCGCGCATCATATACAAACTCTCCAGAGGTATCCTCTGTCCATCAACGAGCCAGGACGCCAAGGTGCGGTGAGCTTCAGGGGCCCCAAGTGAGCAGATTGATGCCTTACCAGCAGGCGTTAGTAGGTGTGGCCCGATGGCCTGATCCGTATTTTAACAGGGACGATGCGCCCCACCAGATGGAGTATGGAGAATCGTTCTACCATAAAAGCCGAGAGCTTGGTGCGTCGGTCGCCAATGGAGAGATAGAAACGTTTCAGGAGCTCTGGAGTGAAGCTCGTGATTGGAGAGCTTCCAGAGCAGGCCAAGATGCTCGACTTTTTAGTTCATCGCGTGATCCCAACTCTTCACGG…	MGCVSSKASVISSDSFRASYTNSPEVSSVHQRARTPRCGELQGPQVSRLMPYQQALVGVARWPDPYFNRDDAPHQMEYGESFYHKSRELGASVANGEIETFQELWSEARDWRASRAGQDARLFSSSRDPNSSRAFVTPITGPYEFLKDRFANRKDGEKDKMLDFLPHSNTFRFHGKIDGERLPLTWISISSDRHADRTKDPYQRLRDQGMNDVGEPNVMLHTQAEYVPKIMQHVEHLYKAATDAALSDANALKKLAEIHWRTVQAVPDFRGSAAKAELCVRSIAQARGMDLPPMRLGIVPDLEALTMPLKDFVKSYQGFFEHN	972	323
Ppi1704B_AvrB2d_1	Ppi1704B	AvrB	AvrB	AvrB	AvrB2	15	73	64	ATGCTGGATTTTCTCCCACACAGCAATACGTTTAGGTTTCATGGGAAAATTGACGGTGAGCGACTTCCTCTCACCTGGATCTCGATAAGTTCTGATCGTCATGCCGACAGAACAAAGGATCCTTACCAACGGTTGCGCGACCAAGGCATGAACGATGTGGGTGAGCCTAACGTGATGTTGCACACCCAAGCCGAGTATGTCCCCAAAATTATGCAACATGTGGAGCATCTTTATAAGGCCGCTACGGATGCTGCATTGTCCGATGCCAATGCGCTGAAAAAACTCGCAGAGATACATTGGCGGACGGTACAAGCTGTTCCCGACTTTCGTGGAAGTGCAGCTAAGGCTGAGCTCTGCGTGCGCTCCATTGCCCAGGCAAGGGGCATGGACCTGCCGCCG…	MLDFLPHSNTFRFHGKIDGERLPLTWISISSDRHADRTKDPYQRLRDQGMNDVGEPNVMLHTQAEYVPKIMQHVEHLYKAATDAALSDANALKKLAEIHWRTVQAVPDFRGSAAKAELCVRSIAQARGMDLPPMRLGIVPDLEALTMPLKDFVKSYQGFFEHN	492	163
PpiH6E5_AvrB2d_1	PpiH6E5	AvrB	AvrB	AvrB	AvrB2	15	73	64	ATGCTGGATTTTCTCCCACACAGCAATACGTTTAGGTTTCATGGGAAAATTGACGGTGAGCGACTTCCTCTCACCTGGATCTCGATAAGTTCTGATCGTCATGCCGACAGAACAAAGGATCCTTACCAACGGTTGCGCGACCAAGGCATGAACGATGTGGGTGAGCCTAACGTGATGTTGCACACCCAAGCCGAGTATGTCCCCAAAATTATGCAACATGTGGAGCATCTTTATAAGGCCGCTACGGATGCTGCATTGTCCGATGCCAATGCGCTGAAAAAACTCGCAGAGATACATTGGCGGACGGTACAAGCTGTTCCCGACTTTCGTGGAAGTGCAGCTAAGGCTGAGCTCTGCGTGCGCTCCATTGCCCAGGCAAGGGGCATGGACCTGCCGCCG…	MLDFLPHSNTFRFHGKIDGERLPLTWISISSDRHADRTKDPYQRLRDQGMNDVGEPNVMLHTQAEYVPKIMQHVEHLYKAATDAALSDANALKKLAEIHWRTVQAVPDFRGSAAKAELCVRSIAQARGMDLPPMRLGIVPDLEALTMPLKDFVKSYQGFFEHN	492	163
PpiR6a_AvrB2d_1	PpiR6a	AvrB	AvrB	AvrB	AvrB2	15	73	64	ATGCTGGATTTTCTCCCACACAGCAATACGTTTAGGTTTCATGGGAAAATTGACGGTGAGCGACTTCCTCTCACCTGGATCTCGATAAGTTCTGATCGTCATGCCGACAGAACAAAGGATCCTTACCAACGGTTGCGCGACCAAGGCATGAACGATGTGGGTGAGCCTAACGTGATGTTGCACACCCAAGCCGAGTATGTCCCCAAAATTATGCAACATGTGGAGCATCTTTATAAGGCCGCTACGGATGCTGCATTGTCCGATGCCAATGCGCTGAAAAAACTCGCAGAGATACATTGGCGGACGGTACAAGCTGTTCCCGACTTTCGTGGAAGTGCAGCTAAGGCTGAGCTCTGCGTGCGCTCCATTGCCCAGGCAAGGGGCATGGACCTGCCGCCG…	MLDFLPHSNTFRFHGKIDGERLPLTWISISSDRHADRTKDPYQRLRDQGMNDVGEPNVMLHTQAEYVPKIMQHVEHLYKAATDAALSDANALKKLAEIHWRTVQAVPDFRGSAAKAELCVRSIAQARGMDLPPMRLGIVPDLEALTMPLKDFVKSYQGFFEHN	492	163
PpiH5E3_AvrB2d_1	PpiH5E3	AvrB	AvrB	AvrB	AvrB2	15	73	65	ATGCTGGATTTTCTCCCACACAGCAATACGTTTAGGTTTCATGGGAAAATTGACGGTGAGCGACTTCCTCTCACCTGGATCTCGATAAGTTCTGATCGTCATGCCGACAGAACAAAGGATCCTTACCAACGGTTGCGCGACCAAGGCATGAACGATGTGGGTGAGCCTAACGTGATGTTGCACACCCAAGCCGAGTATGTCCCCAAAATTATGCAACATGTGGAGCATCTTTATAAGGCCGCTACGGATGCTGCATTGTCCGATGCCAATGCGCTGAAAAAACTCGCAGAGATACATTGGTGGACGGTACAAGCTGTTCCCGACTTTCGTGGAAGTGCAGCTAAGGCTGAGCTCTGCGTGCGCTCCATTGCCCAGGCAAGGGGCATGGACCTGCCGCCG…	MLDFLPHSNTFRFHGKIDGERLPLTWISISSDRHADRTKDPYQRLRDQGMNDVGEPNVMLHTQAEYVPKIMQHVEHLYKAATDAALSDANALKKLAEIHWWTVQAVPDFRGSAAKAELCVRSIAQARGMDLPPMRLGIVPDLEALTMPLKDFVKSYQGFFEHN	492	163
Psy0529_AvrB2d_1	Psy0529	AvrB	AvrB	AvrB	AvrB2	15	73	66	ATGCTGGATTTTCTCCCACACAGCAATACGTTTAGGTTTCATGGGAAAATTGACGGTGAGCGACTTCCTCTCACCTGGATCTCGATAAGTTCTGATCGTCATGTCGACAGAACAAAGGATCCTTACCAAAGGTTGCGCAACCAAGGCATGAACGATGTGGGTGAGCCTAATGTGATGTTGCACACCCAAGCCGAGTATGTGCCCAAAATTATGCAACATGTGGAGCATCTTTATAAGGCCGCTACGGATGCTGCATTGTCCGATGCCAATGCGCTGAAAAAACTCGCAGAGATACATTGGTGGACGGTACAAGCTGTTCCCGACTTTCGTGGAAGTGCAGCTAAGGCTGAGCTCTGCGTGCGCTCCATTGCCCAGGCAAGGGGCATGGACCTGCCGCCG…	MLDFLPHSNTFRFHGKIDGERLPLTWISISSDRHVDRTKDPYQRLRNQGMNDVGEPNVMLHTQAEYVPKIMQHVEHLYKAATDAALSDANALKKLAEIHWWTVQAVPDFRGSAAKAELCVRSIAQARGMDLPPMRLGIVPDLEALTMPLKDFVKSYEGFFEHN	492	163
Psy0543_AvrB2d_1	Psy0543	AvrB	AvrB	AvrB	AvrB2	15	73	66	ATGCTGGATTTTCTCCCACACAGCAATACGTTTAGGTTTCATGGGAAAATTGACGGTGAGCGACTTCCTCTCACCTGGATCTCGATAAGTTCTGATCGTCATGTCGACAGAACAAAGGATCCTTACCAAAGGTTGCGCAACCAAGGCATGAACGATGTGGGTGAGCCTAATGTGATGTTGCACACCCAAGCCGAGTATGTGCCCAAAATTATGCAACATGTGGAGCATCTTTATAAGGCCGCTACGGATGCTGCATTGTCCGATGCCAATGCGCTGAAAAAACTCGCAGAGATACATTGGTGGACGGTACAAGCTGTTCCCGACTTTCGTGGAAGTGCAGCTAAGGCTGAGCTCTGCGTGCGCTCCATTGCCCAGGCAAGGGGCATGGACCTGCCGCCG…	MLDFLPHSNTFRFHGKIDGERLPLTWISISSDRHVDRTKDPYQRLRNQGMNDVGEPNVMLHTQAEYVPKIMQHVEHLYKAATDAALSDANALKKLAEIHWWTVQAVPDFRGSAAKAELCVRSIAQARGMDLPPMRLGIVPDLEALTMPLKDFVKSYEGFFEHN	492	163
Psy0544_AvrB2d_1	Psy0544	AvrB	AvrB	AvrB	AvrB2	15	73	66	ATGCTGGATTTTCTCCCACACAGCAATACGTTTAGGTTTCATGGGAAAATTGACGGTGAGCGACTTCCTCTCACCTGGATCTCGATAAGTTCTGATCGTCATGTCGACAGAACAAAGGATCCTTACCAAAGGTTGCGCAACCAAGGCATGAACGATGTGGGTGAGCCTAATGTGATGTTGCACACCCAAGCCGAGTATGTGCCCAAAATTATGCAACATGTGGAGCATCTTTATAAGGCCGCTACGGATGCTGCATTGTCCGATGCCAATGCGCTGAAAAAACTCGCAGAGATACATTGGTGGACGGTACAAGCTGTTCCCGACTTTCGTGGAAGTGCAGCTAAGGCTGAGCTCTGCGTGCGCTCCATTGCCCAGGCAAGGGGCATGGACCTGCCGCCG…	MLDFLPHSNTFRFHGKIDGERLPLTWISISSDRHVDRTKDPYQRLRNQGMNDVGEPNVMLHTQAEYVPKIMQHVEHLYKAATDAALSDANALKKLAEIHWWTVQAVPDFRGSAAKAELCVRSIAQARGMDLPPMRLGIVPDLEALTMPLKDFVKSYEGFFEHN	492	163
Psy0550_AvrB2d_1	Psy0550	AvrB	AvrB	AvrB	AvrB2	15	73	66	ATGCTGGATTTTCTCCCACACAGCAATACGTTTAGGTTTCATGGGAAAATTGACGGTGAGCGACTTCCTCTCACCTGGATCTCGATAAGTTCTGATCGTCATGTCGACAGAACAAAGGATCCTTACCAAAGGTTGCGCAACCAAGGCATGAACGATGTGGGTGAGCCTAATGTGATGTTGCACACCCAAGCCGAGTATGTGCCCAAAATTATGCAACATGTGGAGCATCTTTATAAGGCCGCTACGGATGCTGCATTGTCCGATGCCAATGCGCTGAAAAAACTCGCAGAGATACATTGGTGGACGGTACAAGCTGTTCCCGACTTTCGTGGAAGTGCAGCTAAGGCTGAGCTCTGCGTGCGCTCCATTGCCCAGGCAAGGGGCATGGACCTGCCGCCG…	MLDFLPHSNTFRFHGKIDGERLPLTWISISSDRHVDRTKDPYQRLRNQGMNDVGEPNVMLHTQAEYVPKIMQHVEHLYKAATDAALSDANALKKLAEIHWWTVQAVPDFRGSAAKAELCVRSIAQARGMDLPPMRLGIVPDLEALTMPLKDFVKSYEGFFEHN	492	163
Psy0541_AvrB2d_1	Psy0541	AvrB	AvrB	AvrB	AvrB2	15	73	67	ATGCTGGATTTTCTCCCACACAGCAATACGTTTAGGTTTCATGGGAAAATTGACGGTGAGCGACTTCCTCTCACCTGGATCTCGATAAGTTCTGATCGTCGTGCCGACAGAACAAAGGATCCTTACCAAAGGTTGCGCGACCAAGGCATGAACGATGTGGGTGAGCCTAATGTGATGTTGCACACCCAAGCCGAGTATGTGCCCAAAATTATGCAACATGTGGAGCATCTTTATAAGGCCGCTACGGATGCTGCATTGTCCGATGCCAATGCGCTGAAAAAACTCGCAGAGATACATTGGTGGACGGTACAAGCTGTTCCCGACTTTCGTGGAAGTGCAGCTAAGGCTGAGCTCTGCGTGCGCTCCATTGCCCAGGCAAGGGGCATGGACCTGCCGCCG…	MLDFLPHSNTFRFHGKIDGERLPLTWISISSDRRADRTKDPYQRLRDQGMNDVGEPNVMLHTQAEYVPKIMQHVEHLYKAATDAALSDANALKKLAEIHWWTVQAVPDFRGSAAKAELCVRSIAQARGMDLPPMRLGIVPDLEALTMPLKDFVKSYEGFFEHN	492	163
Psy0547_AvrB2d_1	Psy0547	AvrB	AvrB	AvrB	AvrB2	15	73	67	ATGCTGGATTTTCTCCCACACAGCAATACGTTTAGGTTTCATGGGAAAATTGACGGTGAGCGACTTCCTCTCACCTGGATCTCGATAAGTTCTGATCGTCGTGCCGACAGAACAAAGGATCCTTACCAAAGGTTGCGCGACCAAGGCATGAACGATGTGGGTGAGCCTAATGTGATGTTGCACACCCAAGCCGAGTATGTGCCCAAAATTATGCAACATGTGGAGCATCTTTATAAGGCCGCTACGGATGCTGCATTGTCCGATGCCAATGCGCTGAAAAAACTCGCAGAGATACATTGGTGGACGGTACAAGCTGTTCCCGACTTTCGTGGAAGTGCAGCTAAGGCTGAGCTCTGCGTGCGCTCCATTGCCCAGGCAAGGGGCATGGACCTGCCGCCG…	MLDFLPHSNTFRFHGKIDGERLPLTWISISSDRRADRTKDPYQRLRDQGMNDVGEPNVMLHTQAEYVPKIMQHVEHLYKAATDAALSDANALKKLAEIHWWTVQAVPDFRGSAAKAELCVRSIAQARGMDLPPMRLGIVPDLEALTMPLKDFVKSYEGFFEHN	492	163
PsyB728A_AvrB2d_1	PsyB728A	AvrB	AvrB	AvrB	AvrB2	15	73	67	ATGCTGGATTTTCTCCCACACAGCAATACGTTTAGGTTTCATGGGAAAATTGACGGTGAGCGACTTCCTCTCACCTGGATCTCGATAAGTTCTGATCGTCGTGCCGACAGAACAAAGGATCCTTACCAAAGGTTGCGCGACCAAGGCATGAACGATGTGGGTGAGCCTAATGTGATGTTGCACACCCAAGCCGAGTATGTGCCCAAAATTATGCAACATGTGGAGCATCTTTATAAGGCCGCTACGGATGCTGCATTGTCCGATGCCAATGCGCTGAAAAAACTCGCAGAGATACATTGGTGGACGGTACAAGCTGTTCCCGACTTTCGTGGAAGTGCAGCTAAGGCTGAGCTCTGCGTGCGCTCCATTGCCCAGGCAAGGGGCATGGACCTGCCGCCG…	MLDFLPHSNTFRFHGKIDGERLPLTWISISSDRRADRTKDPYQRLRDQGMNDVGEPNVMLHTQAEYVPKIMQHVEHLYKAATDAALSDANALKKLAEIHWWTVQAVPDFRGSAAKAELCVRSIAQARGMDLPPMRLGIVPDLEALTMPLKDFVKSYEGFFEHN	492	163
Psy1212_AvrB2d_1	Psy1212	AvrB	AvrB	AvrB	AvrB2	15	73	68	ATGCTGGATTTTCTCCCACACAGCAATACGTTTAGGTTTCATGGGAAAATTGACGGTGAGCGACTTCCTCTCACCTGGATCTCGATAAGTTCTGATCGTCATGTCGACAGAACAAAGGATCCCTACCAAAGGTTGCGCAACCAAGGCATGAACGATGTGGGTGAGCCTAATGTGATGTTGCACACCCAAGCCGAGTATGTGCCCAAAATTATGCAACATGTGGAGCATCTTTATAAGGCCGCTACGGATGCTGCATTGTCCGATGCCAATGCGCTGAAAAAACTCGCAGAGATACATTGGTGGACGGTACAAGCTGTTCCCGACTTTCGTGGAAGTGCAGCTAAGGCTGAGCTCTGCGTGCGCTCCATTGCCCAGGCAAGGGGCATGGACCTGCCGCCG…	MLDFLPHSNTFRFHGKIDGERLPLTWISISSDRHVDRTKDPYQRLRNQGMNDVGEPNVMLHTQAEYVPKIMQHVEHLYKAATDAALSDANALKKLAEIHWWTVQAVPDFRGSAAKAELCVRSIAQARGMDLPPMRLGIVPDLEALTMPLKDFVKSYEGFFEHN	492	163
Pcn3113_AvrB2e_1	Pcn3113	AvrB	AvrB	AvrB	AvrB2	15	73	69	ATGGGTTGTGCATCTTCAAATATGTCGGTTAGTTCGTCTGGGAGTTTTCGAGCAAATAGTCTGAATTCTCCAGATCATTCTAGAGCTGAATCCTCTAGTGTGAATTCTACATCGAGATCCCCAAGGTTCGGTGAGCTTAAAGGACCACAAGACAGCCGGTTAACTCAGCATCAACAATCGTTAGTCGGTGTGGCTCGTTGGCCGAATCCTAATTTTAATAGAGATCACACGCCCTACCAGATGGAGTATGGCCAGTCTTTTTATCATAAAAGCCGAGAGTTGGGCGCCGCGATTGCTGGGGGGAATATCAATAGTTTTAGTGAGGCTTGGGACGAGGCACGTGATTGGAGAAGCGCCAGAGCCGGCGACAAGGCAAAGGAGTTTGCCGATATCCGTGAT…	MGCASSNMSVSSSGSFRANSLNSPDHSRAESSSVNSTSRSPRFGELKGPQDSRLTQHQQSLVGVARWPNPNFNRDHTPYQMEYGQSFYHKSRELGAAIAGGNINSFSEAWDEARDWRSARAGDKAKEFADIRDPNWPREFITPLTGPYEYIKDRFAKRKDADIRRPTGTLPKSKVFKVYGKIDGEPLLLTCIWMTTDRHADRTKEPYPNMRRIGMNDIGEPYVIVHTDAEHIPKILQHVEGLYGVATDATISDARALKTLAEIHWWGVHAVPDMRGSAAKAELCVRSIAQARGMDLPPMKPGIVPDLEALTMNLKDFVNSYEGFFDHS	987	328
PorICMP9093_AvrB2e_1	PorICMP9093	AvrB	AvrB	AvrB	AvrB2	15	73	69	ATGGGTTGTGCATCTTCAAATATGTCGGTTAGTTCGTCTGGGAGTTTTCGAGCAAATAGTCTGAATTCTCCAGATCATTCTAGAGCTGAATCCTCTAGTGTGAATTCTACATCGAGATCCCCAAGGTTCGGTGAGCTTAAAGGACCACAAGACAGCCGGTTAACTCAGCATCAACAATCGTTAGTCGGTGTGGCTCGTTGGCCGAATCCTAATTTTAATAGAGATCACACGCCCTACCAGATGGAGTATGGCCAGTCTTTTTATCATAAAAGCCGAGAGTTGGGCGCCGCGATTGCTGGGGGGAATATCAATAGTTTTAGTGAGGCTTGGGACGAGGCACGTGATTGGAGAAGCGCCAGAGCCGGCGACAAGGCAAAGGAGTTTGCCGATATCCGTGAT…	MGCASSNMSVSSSGSFRANSLNSPDHSRAESSSVNSTSRSPRFGELKGPQDSRLTQHQQSLVGVARWPNPNFNRDHTPYQMEYGQSFYHKSRELGAAIAGGNINSFSEAWDEARDWRSARAGDKAKEFADIRDPNWPREFITPLTGPYEYIKDRFAKRKDADIRRPTGTLPKSKVFKVYGKIDGEPLLLTCIWMTTDRHADRTKEPYPNMRRIGMNDIGEPYVIVHTDAEHIPKILQHVEGLYGVATDATISDARALKTLAEIHWWGVHAVPDMRGSAAKAELCVRSIAQARGMDLPPMKPGIVPDLEALTMNLKDFVNSYEGFFDHS	987	328
PorICMP9095_AvrB2e_1	PorICMP9095	AvrB	AvrB	AvrB	AvrB2	15	73	69	ATGGGTTGTGCATCTTCAAATATGTCGGTTAGTTCGTCTGGGAGTTTTCGAGCAAATAGTCTGAATTCTCCAGATCATTCTAGAGCTGAATCCTCTAGTGTGAATTCTACATCGAGATCCCCAAGGTTCGGTGAGCTTAAAGGACCACAAGACAGCCGGTTAACTCAGCATCAACAATCGTTAGTCGGTGTGGCTCGTTGGCCGAATCCTAATTTTAATAGAGATCACACGCCCTACCAGATGGAGTATGGCCAGTCTTTTTATCATAAAAGCCGAGAGTTGGGCGCCGCGATTGCTGGGGGGAATATCAATAGTTTTAGTGAGGCTTGGGACGAGGCACGTGATTGGAGAAGCGCCAGAGCCGGCGACAAGGCAAAGGAGTTTGCCGATATCCGTGAT…	MGCASSNMSVSSSGSFRANSLNSPDHSRAESSSVNSTSRSPRFGELKGPQDSRLTQHQQSLVGVARWPNPNFNRDHTPYQMEYGQSFYHKSRELGAAIAGGNINSFSEAWDEARDWRSARAGDKAKEFADIRDPNWPREFITPLTGPYEYIKDRFAKRKDADIRRPTGTLPKSKVFKVYGKIDGEPLLLTCIWMTTDRHADRTKEPYPNMRRIGMNDIGEPYVIVHTDAEHIPKILQHVEGLYGVATDATISDARALKTLAEIHWWGVHAVPDMRGSAAKAELCVRSIAQARGMDLPPMKPGIVPDLEALTMNLKDFVNSYEGFFDHS	987	328
PcnICMP10052_AvrB2e_1	PcnICMP10052	AvrB	AvrB	AvrB	AvrB2	15	73	70	ATGGGTTGTGCATCTTCAAATATGTCGGTTAGTTCGTCTGGGAGTTTTCGAGCAAATAGTCTGAGTTCTCCAGATCATTCTAGAGCTGAATCCTCTAGTGTGAATTCTACATCGAGATCCCCAAGGTTCGGTGAGCTTAAAGGACCACAAGACAGCCGGTTAACTCAGCATCAACAATCGTTAGTCGGTGTGGCTCGTTGGCCGAATCCTAATTTTAATAGAGATCACACGCCCTACCAGATGGAGTATGGCCAGTCTTTTTATCATAAAAGCCGAGAGTTGGGCGCCGCGATTGCTGGGGGGAATATCAATAGTTTTAGTGAGGCTTGGGACGAGGCACGTGATTGGAGAAGCGCCAGAGCCGGCGACAAGGCAAAGGAGTTTGCCGATATCCGTGAT…	MGCASSNMSVSSSGSFRANSLSSPDHSRAESSSVNSTSRSPRFGELKGPQDSRLTQHQQSLVGVARWPNPNFNRDHTPYQMEYGQSFYHKSRELGAAIAGGNINSFSEAWDEARDWRSARAGDKAKEFADIRDPNWPREFITPLTGPYEYIKDRFAKRKDADIRRPTGTLPKSKVFKVYGKIDGEPLLLTCIWMTTDRHADRTKEPYPNMRRIGMNDIGEPYVIVHTDAEHIPKILQHVEGLYGVATDATISDARALKTLAEIHWWGVHAVPDMRGSAAKAELCVRSIAQARGMDLPPMKPGIVPDLEALTMNLKDFVNSYEGFFDHS	987	328
PcnICMP4329_AvrB2e_1	PcnICMP4329	AvrB	AvrB	AvrB	AvrB2	15	73	71	ATGGGTTGTGCATCTTCAAATATGTCGGTTAGTTCGTCTGGGAGTTTTCGAGCAAATAGTCTGAATTCTCCAGCTCATTCTAGAGCTGAATCCTCTAGTGTGAATTCTACATCGAGATCCCCAAGGTTCGGTGAGCTTAAAGGACCACAAGACAGCCGGTTAACTCAGCATCAACAATCGTTAGTCGGTGTGGCTCGTTGGCCGAATCCTAATTTTAATAGAGATCACACGCCCTACCAGATGGAGTATGGCCAGTCTTTTTATCATAAAAGCCGAGAGTTGGGCGCCGCGATTGCTGGGGGGAATATCAATAGTTTTAGTGAGGCTTGGGACGAGGCACGTGATTGGAGAAGCGCCAGAGCCGGCGACAAGGCAAAGGAGTTTGCCGATATCCGTGAT…	MGCASSNMSVSSSGSFRANSLNSPAHSRAESSSVNSTSRSPRFGELKGPQDSRLTQHQQSLVGVARWPNPNFNRDHTPYQMEYGQSFYHKSRELGAAIAGGNINSFSEAWDEARDWRSARAGDKAKEFADIRDPNWPREFITPLTGPYEYIKDRFAKRKDADIRRPTGTLPKSKVFKVYGKIDGEPLLLTCIWMTTDRHADRTKEPYPNMRRIGMNDIGEPYVIVHTDAEHIPKILQHVEGLYGVATDATISDARALKTLAEIHWWGVHAVPDMRGSAAKAELCVRSIAQARGMDLPPMKPGIVPDLEALTMNLKDFVNSYEGFFDHS	987	328
PgcICMP3649_AvrB2e_1	PgcICMP3649	AvrB	AvrB	AvrB	AvrB2	15	73	71	ATGGGTTGTGCATCTTCAAATATGTCGGTTAGTTCGTCTGGGAGTTTTCGAGCAAATAGTCTGAATTCTCCAGCTCATTCTAGAGCTGAATCCTCTAGTGTGAATTCTACATCGAGATCCCCAAGGTTCGGTGAGCTTAAAGGACCACAAGACAGCCGGTTAACTCAGCATCAACAATCGTTAGTCGGTGTGGCTCGTTGGCCGAATCCTAATTTTAATAGAGATCACACGCCCTACCAGATGGAGTATGGCCAGTCTTTTTATCATAAAAGCCGAGAGTTGGGCGCCGCGATTGCTGGGGGGAATATCAATAGTTTTAGTGAGGCTTGGGACGAGGCACGTGATTGGAGAAGCGCCAGAGCCGGCGACAAGGCAAAGGAGTTTGCCGATATCCGTGAT…	MGCASSNMSVSSSGSFRANSLNSPAHSRAESSSVNSTSRSPRFGELKGPQDSRLTQHQQSLVGVARWPNPNFNRDHTPYQMEYGQSFYHKSRELGAAIAGGNINSFSEAWDEARDWRSARAGDKAKEFADIRDPNWPREFITPLTGPYEYIKDRFAKRKDADIRRPTGTLPKSKVFKVYGKIDGEPLLLTCIWMTTDRHADRTKEPYPNMRRIGMNDIGEPYVIVHTDAEHIPKILQHVEGLYGVATDATISDARALKTLAEIHWWGVHAVPDMRGSAAKAELCVRSIAQARGMDLPPMKPGIVPDLEALTMNLKDFVNSYEGFFDHS	987	328
PgcICMP5019_AvrB2e_1	PgcICMP5019	AvrB	AvrB	AvrB	AvrB2	15	73	71	ATGGGTTGTGCATCTTCAAATATGTCGGTTAGTTCGTCTGGGAGTTTTCGAGCAAATAGTCTGAATTCTCCAGCTCATTCTAGAGCTGAATCCTCTAGTGTGAATTCTACATCGAGATCCCCAAGGTTCGGTGAGCTTAAAGGACCACAAGACAGCCGGTTAACTCAGCATCAACAATCGTTAGTCGGTGTGGCTCGTTGGCCGAATCCTAATTTTAATAGAGATCACACGCCCTACCAGATGGAGTATGGCCAGTCTTTTTATCATAAAAGCCGAGAGTTGGGCGCCGCGATTGCTGGGGGGAATATCAATAGTTTTAGTGAGGCTTGGGACGAGGCACGTGATTGGAGAAGCGCCAGAGCCGGCGACAAGGCAAAGGAGTTTGCCGATATCCGTGAT…	MGCASSNMSVSSSGSFRANSLNSPAHSRAESSSVNSTSRSPRFGELKGPQDSRLTQHQQSLVGVARWPNPNFNRDHTPYQMEYGQSFYHKSRELGAAIAGGNINSFSEAWDEARDWRSARAGDKAKEFADIRDPNWPREFITPLTGPYEYIKDRFAKRKDADIRRPTGTLPKSKVFKVYGKIDGEPLLLTCIWMTTDRHADRTKEPYPNMRRIGMNDIGEPYVIVHTDAEHIPKILQHVEGLYGVATDATISDARALKTLAEIHWWGVHAVPDMRGSAAKAELCVRSIAQARGMDLPPMKPGIVPDLEALTMNLKDFVNSYEGFFDHS	987	328
PgcNCPPB2708_AvrB2e_1	PgcNCPPB2708	AvrB	AvrB	AvrB	AvrB2	15	73	71	ATGGGTTGTGCATCTTCAAATATGTCGGTTAGTTCGTCTGGGAGTTTTCGAGCAAATAGTCTGAATTCTCCAGCTCATTCTAGAGCTGAATCCTCTAGTGTGAATTCTACATCGAGATCCCCAAGGTTCGGTGAGCTTAAAGGACCACAAGACAGCCGGTTAACTCAGCATCAACAATCGTTAGTCGGTGTGGCTCGTTGGCCGAATCCTAATTTTAATAGAGATCACACGCCCTACCAGATGGAGTATGGCCAGTCTTTTTATCATAAAAGCCGAGAGTTGGGCGCCGCGATTGCTGGGGGGAATATCAATAGTTTTAGTGAGGCTTGGGACGAGGCACGTGATTGGAGAAGCGCCAGAGCCGGCGACAAGGCAAAGGAGTTTGCCGATATCCGTGAT…	MGCASSNMSVSSSGSFRANSLNSPAHSRAESSSVNSTSRSPRFGELKGPQDSRLTQHQQSLVGVARWPNPNFNRDHTPYQMEYGQSFYHKSRELGAAIAGGNINSFSEAWDEARDWRSARAGDKAKEFADIRDPNWPREFITPLTGPYEYIKDRFAKRKDADIRRPTGTLPKSKVFKVYGKIDGEPLLLTCIWMTTDRHADRTKEPYPNMRRIGMNDIGEPYVIVHTDAEHIPKILQHVEGLYGVATDATISDARALKTLAEIHWWGVHAVPDMRGSAAKAELCVRSIAQARGMDLPPMKPGIVPDLEALTMNLKDFVNSYEGFFDHS	987	328
PcnKN221_AvrB2e_1	PcnKN221	AvrB	AvrB	AvrB	AvrB2	15	73	72	ATGGGTTGTGCATCTTCAAATATGTCGGTTAGTTCGTCTGGGAGTTTTCGAGCAAATAGTCTGAATTCTCCAGCTCATTCTAGAGCTGAATCCTCTAGTGTGAATTCTACATCGAGATCCCCAAGGTTCGGTGAGCTTAAAGGACCACAAGACAGCCGGTTAACTCAGCATCAACAATCGTTAGTCGGTGTGGCTCGTTGGCCGAATCCTAATTTTAATAGAGATCACACGCCCTACCAGATGGAGTATGGCCAGTCTTTTTATCATAAAAGCCGAGAGTTGGGCGCCGCGATTGCTGGGGGGAATATCAATAGTTTTAGTGAGGCTTGGGACGAGGCACGTGATTGGAGAAGCGCCAGAGCCGGCGACAAGGCAAAGGAGTTTGCCGATATCCGTGAT…	MGCASSNMSVSSSGSFRANSLNSPAHSRAESSSVNSTSRSPRFGELKGPQDSRLTQHQQSLVGVARWPNPNFNRDHTPYQMEYGQSFYHKSRELGAAIAGGNINSFSEAWDEARDWRSARAGDKAKEFADIRDPNWPREFITPLTGPYEYIKDRFAKRKDADIRRPTGTLPKSKVFKVYGKIDGEPLLLTCIWMTTDRHADRTKEPYPNMRRIGMNDIGEPYVIVHTDAEHIPKILQHVEGLYGVDTDATISDARALKTLAEIHWWGVHAVPDMRGSAAKAELCVRSIAQARGMDLPPMKPGIVPDLEALTMNLKDFVNSYEGFFDHS	987	328
Por36_1_AvrB2e_1	Por36_1	AvrB	AvrB	AvrB	AvrB2	15	73	73	ATGGGTTGTGCATCTTCAAATATGTCGGTTAGTTCGTCTGGGAGTTTTCGAGCAAATAGTCTGAGTTCTCCAGATCATTCTAGAGCTGAATCCTCTAGTGTGAATTCTACATCGAGATCCCCAAGGTTCGGTGAGCTTAAAGGACCACAAGACAGCTGGTTAACTCAGCATCAACAATCGTTAGTCGGTGTGGCTCGTTGGCCGAATCCTAATTTTAATAGAGATCACACGCCCTACCAGATGGAGTATGGCCAGTCTTTTTATCATAAAAGCCGAGAGTTGGGCGCCGCGATTGCTGGGGGGAATATCAATAGTTTTAGTGAGGCTTGGGACGAGGCACGTGATTGGAGAAGCGCCAGAGCCGGCGACAAGGCAAAGGAGTTTGCCGATATCCGTGAT…	MGCASSNMSVSSSGSFRANSLSSPDHSRAESSSVNSTSRSPRFGELKGPQDSWLTQHQQSLVGVARWPNPNFNRDHTPYQMEYGQSFYHKSRELGAAIAGGNINSFSEAWDEARDWRSARAGDKAKEFADIRDPNWPREFITPLTGPYEYIKDRFAKRKDADIRRPTGTLPKSKVFKVYGKIDGEPLLLTCIWMTTDRHADRTKEPYPNMRRIGMNDIGEPYVIVHTDAEHIPKILQHVEGLYGVATDATISDARALKTLAEIHWWGVHAVPDMRGSAAKAELCVRSIAQARGMDLPPMKPGIVPDLEALTMNLKDFVNSYEGFFDHS	987	328
PorICMP9088_AvrB2e_1	PorICMP9088	AvrB	AvrB	AvrB	AvrB2	15	73	73	ATGGGTTGTGCATCTTCAAATATGTCGGTTAGTTCGTCTGGGAGTTTTCGAGCAAATAGTCTGAGTTCTCCAGATCATTCTAGAGCTGAATCCTCTAGTGTGAATTCTACATCGAGATCCCCAAGGTTCGGTGAGCTTAAAGGACCACAAGACAGCTGGTTAACTCAGCATCAACAATCGTTAGTCGGTGTGGCTCGTTGGCCGAATCCTAATTTTAATAGAGATCACACGCCCTACCAGATGGAGTATGGCCAGTCTTTTTATCATAAAAGCCGAGAGTTGGGCGCCGCGATTGCTGGGGGGAATATCAATAGTTTTAGTGAGGCTTGGGACGAGGCACGTGATTGGAGAAGCGCCAGAGCCGGCGACAAGGCAAAGGAGTTTGCCGATATCCGTGAT…	MGCASSNMSVSSSGSFRANSLSSPDHSRAESSSVNSTSRSPRFGELKGPQDSWLTQHQQSLVGVARWPNPNFNRDHTPYQMEYGQSFYHKSRELGAAIAGGNINSFSEAWDEARDWRSARAGDKAKEFADIRDPNWPREFITPLTGPYEYIKDRFAKRKDADIRRPTGTLPKSKVFKVYGKIDGEPLLLTCIWMTTDRHADRTKEPYPNMRRIGMNDIGEPYVIVHTDAEHIPKILQHVEGLYGVATDATISDARALKTLAEIHWWGVHAVPDMRGSAAKAELCVRSIAQARGMDLPPMKPGIVPDLEALTMNLKDFVNSYEGFFDHS	987	328
PorICMP9091_AvrB2e_1	PorICMP9091	AvrB	AvrB	AvrB	AvrB2	15	73	73	ATGGGTTGTGCATCTTCAAATATGTCGGTTAGTTCGTCTGGGAGTTTTCGAGCAAATAGTCTGAGTTCTCCAGATCATTCTAGAGCTGAATCCTCTAGTGTGAATTCTACATCGAGATCCCCAAGGTTCGGTGAGCTTAAAGGACCACAAGACAGCTGGTTAACTCAGCATCAACAATCGTTAGTCGGTGTGGCTCGTTGGCCGAATCCTAATTTTAATAGAGATCACACGCCCTACCAGATGGAGTATGGCCAGTCTTTTTATCATAAAAGCCGAGAGTTGGGCGCCGCGATTGCTGGGGGGAATATCAATAGTTTTAGTGAGGCTTGGGACGAGGCACGTGATTGGAGAAGCGCCAGAGCCGGCGACAAGGCAAAGGAGTTTGCCGATATCCGTGAT…	MGCASSNMSVSSSGSFRANSLSSPDHSRAESSSVNSTSRSPRFGELKGPQDSWLTQHQQSLVGVARWPNPNFNRDHTPYQMEYGQSFYHKSRELGAAIAGGNINSFSEAWDEARDWRSARAGDKAKEFADIRDPNWPREFITPLTGPYEYIKDRFAKRKDADIRRPTGTLPKSKVFKVYGKIDGEPLLLTCIWMTTDRHADRTKEPYPNMRRIGMNDIGEPYVIVHTDAEHIPKILQHVEGLYGVATDATISDARALKTLAEIHWWGVHAVPDMRGSAAKAELCVRSIAQARGMDLPPMKPGIVPDLEALTMNLKDFVNSYEGFFDHS	987	328
PorI_6_AvrB2e_1	PorI_6	AvrB	AvrB	AvrB	AvrB2	15	73	74	ATGGGTTGTGCATCTTCAAATATGTCGGTTAGTTCGTCTGGGAGTTTTCGAGCAAATAGTCTGAATTCTCCAGATCATTCTAGAGCTGAATCCTCTAGTGTGAATTCTACATCGAGATCCCCAAGGTTCGGTGAGCTTAAAGGACCACAAGACAGCCGGTTAACTCAGCATCAACAATCGTTAGTCGGTGTGGCTCGTTGGCCGAATCCTAATTTTAATAGAGATCACACGCCCTACCAGATGGAGTATGGTCAGTCTTTTTATCATAAAAGCCGAGAGTTGGGCGCCGCGATTGCTGGGGGGAATATCAATAGTTTTAGTGAGGCTTGGGACGAGGCACGTGATTGGAGAAGCGCCAGAGCCGGCGACAAGGCAAAGGAGTTTGCCGATATCCGTGAT…	MGCASSNMSVSSSGSFRANSLNSPDHSRAESSSVNSTSRSPRFGELKGPQDSRLTQHQQSLVGVARWPNPNFNRDHTPYQMEYGQSFYHKSRELGAAIAGGNINSFSEAWDEARDWRSARAGDKAKEFADIRDPNWPREFITPLTGPYEYIKDRFAKRKDADIRRPTGTLPKSKVFKVYGKIDGEPLLLTCIWMTTDRHADRTKEPYPNMRRIGMNDIGEPYVIVHTDAEHIPKILQHVEGLYGVATDATISDARALKTLAEIHWWGVHAVPDMRGSAAKAELCVRSIAQARGMDLPPMKPGIVPDLEALTMNLKDFVNSYEGFFDHS	987	328
PsfICMP4418_AvrB2e_1	PsfICMP4418	AvrB	AvrB	AvrB	AvrB2	15	73	75	ATGGGTTGTGCATCTTCAAATATGTCGGTTAGTTCGTCTGGGAGTTTTCGAGCAAATAGTCTGAGTTCTCCAGATCATTCTAGAGCTGAATCCTCTAGTGTGAATTCTACATCGAGATCCCCAAGGTTCGGTGAGCTTAAAGGACCACAAGACAGCCGGTTAACTCAGCATCAACAATCGTTAGTCGGTGTGGCTCGTTGGCCGAATCCTAATTTTAATAGAGATCACACGCCCTACCAGATGGAGTATGGCCAGTCTTTTTATCATAAAAGCCGAGAGTTGGGCGCCGCGATTGCTGGGGGGTATATCAATAGTTTTAGTGAGGCTTGGGACGAGGCACGTGATTGGAGAAGCGCCAGAGCCGGCGACAAGGCAAAGGAGTTTGCCGATATCCGTGAT…	MGCASSNMSVSSSGSFRANSLSSPDHSRAESSSVNSTSRSPRFGELKGPQDSRLTQHQQSLVGVARWPNPNFNRDHTPYQMEYGQSFYHKSRELGAAIAGGYINSFSEAWDEARDWRSARAGDKAKEFADIRDPNWPREFITPLTGPYEYIKDRFAKRKDADIRRPTGTLPKSKVFKVYGKIDGEPLLLTCIWMTTDRHADRTKEPYPNMRRIGMNDIGEPYVIVHTDAEHIPKILQHVEGLYGVATDATISDARALKTLAEIHWWGVHAVPDMRGSAAKAELCVRSIAQARGMDLPPMKPGIVPDLEALTMNLKDFVNSYEGFFDHS	987	328
PtrICMP9151_AvrB2e_1	PtrICMP9151	AvrB	AvrB	AvrB	AvrB2	15	73	76	ATGGGTTGTGCATCTTCAAATATGTCGGTTAGTTCGTCTGGGAGTTTTCGAGCAAATAGTCTGAATTCTCCAGATCATTCTAGAGCTGAATACTCTAGTGTGAATTCTACATCGAGATCCCCAAGGTTCGGTGAGCTTAAAGGACCACAAGACAGCCGGTTAACTCAGCATCAACAATCGTTAGTCGGTGTGGCTCGTTGGCCGAATCCTAATTTTAATAGAGATCACACGCCCTACCAGATGGAGTATGGCCAGTCTTTTTATCATAAAAGCCGAGAGTTGGGCGCCGCGATTGCTGGGGGGAATATCAATAGTTTTAGTGAGGCTTGGGACGAGGCACGTGATTGGAGAAGCGCCAGAGCCGGCGACAAGGCAAAGGAGTTTGCCGATATCCGTGAT…	MGCASSNMSVSSSGSFRANSLNSPDHSRAEYSSVNSTSRSPRFGELKGPQDSRLTQHQQSLVGVARWPNPNFNRDHTPYQMEYGQSFYHKSRELGAAIAGGNINSFSEAWDEARDWRSARAGDKAKEFADIRDPNWPREFITPLTGPYEYIKDRFAKRKDADIRRPTGTLPKSKVFKVYGKIDGEPLLLTCIWMTTDRHADRTKEPYPNMRRIGMNDIGEPYVIVHTDAEHIPKILQHVEGLYGVATDATISDARALKTLAEIHWWGVHAVPDMRGSAAKAELCVRSIAQARGMDLPPMKPGIVPDLEALTMNLKDFVNSYEGFFDHS	987	328
PziICMP8959_AvrB2e_1	PziICMP8959	AvrB	AvrB	AvrB	AvrB2	15	73	76	ATGGGTTGTGCATCTTCAAATATGTCGGTTAGTTCGTCTGGGAGTTTTCGAGCAAATAGTCTGAATTCTCCAGATCATTCTAGAGCTGAATACTCTAGTGTGAATTCTACATCGAGATCCCCAAGGTTCGGTGAGCTTAAAGGACCACAAGACAGCCGGTTAACTCAGCATCAACAATCGTTAGTCGGTGTGGCTCGTTGGCCGAATCCTAATTTTAATAGAGATCACACGCCCTACCAGATGGAGTATGGCCAGTCTTTTTATCATAAAAGCCGAGAGTTGGGCGCCGCGATTGCTGGGGGGAATATCAATAGTTTTAGTGAGGCTTGGGACGAGGCACGTGATTGGAGAAGCGCCAGAGCCGGCGACAAGGCAAAGGAGTTTGCCGATATCCGTGAT…	MGCASSNMSVSSSGSFRANSLNSPDHSRAEYSSVNSTSRSPRFGELKGPQDSRLTQHQQSLVGVARWPNPNFNRDHTPYQMEYGQSFYHKSRELGAAIAGGNINSFSEAWDEARDWRSARAGDKAKEFADIRDPNWPREFITPLTGPYEYIKDRFAKRKDADIRRPTGTLPKSKVFKVYGKIDGEPLLLTCIWMTTDRHADRTKEPYPNMRRIGMNDIGEPYVIVHTDAEHIPKILQHVEGLYGVATDATISDARALKTLAEIHWWGVHAVPDMRGSAAKAELCVRSIAQARGMDLPPMKPGIVPDLEALTMNLKDFVNSYEGFFDHS	987	328
PbbICMP8899_AvrB2f_1	PbbICMP8899	AvrB	AvrB	AvrB	AvrB2	15	73	77	ATGGGATGTATCTCATCGAAACCTCAGGTAATGTCTCCTTCCCGTCATTACTCTTCACCTGACGCGGAGCCTGCTACCGCTAGAACATCGCATCGTAGGTCAGCTCGTTATGGTGAATTATCGGGCCCTCCAGCACAAACCGGCTTAACGTATTATCAGCAATCGTTAATTGGCGTAGCTCGCTGGCCCGATCCTCAGTATAACCAAGACCATCTTCCTCATCAGATGGAATATGGTCGTTCCTTCTTCGATGCGTCTCGCCACGCAGGTGCTGGCATTGCTTCGGGTCAAGTTCAAGCATTTAGCCAATTGTGGGCCTTGGCACAGCGCTGGAGAAGCGAAGCTGCTGGCGGAGACTACGAAACTTTTGGCGAGGAAAGCGAGCGATACCCAACTTAC…	MGCISSKPQVMSPSRHYSSPDAEPATARTSHRRSARYGELSGPPAQTGLTYYQQSLIGVARWPDPQYNQDHLPHQMEYGRSFFDASRHAGAGIASGQVQAFSQLWALAQRWRSEAAGGDYETFGEESERYPTYNHNPTTPLENQYAYILDRYRNREDGEFSEDVEGVPTNEFPLRDEIDGKPITLSTVVVSADPDANRYDSKYSALRHLEAGEPFYIRHTFSADVPEVLAHVEGLYNQALDASVSDSQALSILGEIHWWVANAMPDHRGSAAKTEFSVRAIAMARGMELPPMRHGIVADLEAMTTSREAFVRHYNNFFDR	963	320
PpdICMP8903_AvrB2f_1	PpdICMP8903	AvrB	AvrB	AvrB	AvrB2	15	73	77	ATGGGATGTATCTCATCGAAACCTCAGGTAATGTCTCCTTCCCGTCATTACTCTTCACCTGACGCGGAGCCTGCTACCGCTAGAACATCGCATCGTAGGTCAGCTCGTTATGGTGAATTATCGGGCCCTCCAGCACAAACCGGCTTAACGTATTATCAGCAATCGTTAATTGGCGTAGCTCGCTGGCCCGATCCTCAGTATAACCAAGACCATCTTCCTCATCAGATGGAATATGGTCGTTCCTTCTTCGATGCGTCTCGCCACGCAGGTGCTGGCATTGCTTCGGGTCAAGTTCAAGCATTTAGCCAATTGTGGGCCTTGGCACAGCGCTGGAGAAGCGAAGCTGCTGGCGGAGACTACGAAACTTTTGGCGAGGAAAGCGAGCGATACCCAACTTAC…	MGCISSKPQVMSPSRHYSSPDAEPATARTSHRRSARYGELSGPPAQTGLTYYQQSLIGVARWPDPQYNQDHLPHQMEYGRSFFDASRHAGAGIASGQVQAFSQLWALAQRWRSEAAGGDYETFGEESERYPTYNHNPTTPLENQYAYILDRYRNREDGEFSEDVEGVPTNEFPLRDEIDGKPITLSTVVVSADPDANRYDSKYSALRHLEAGEPFYIRHTFSADVPEVLAHVEGLYNQALDASVSDSQALSILGEIHWWVANAMPDHRGSAAKTEFSVRAIAMARGMELPPMRHGIVADLEAMTTSREAFVRHYNNFFDR	963	320
PpeICMP5786_AvrB2f_1	PpeICMP5786	AvrB	AvrB	AvrB	AvrB2	15	73	77	ATGGGATGTATCTCATCGAAACCTCAGGTAATGTCTCCTTCCCGTCATTACTCTTCACCTGACGCGGAGCCTGCTACCGCTAGAACATCGCATCGTAGGTCAGCTCGTTATGGTGAATTATCGGGCCCTCCAGCACAAACCGGCTTAACGTATTATCAGCAATCGTTAATTGGCGTAGCTCGCTGGCCCGATCCTCAGTATAACCAAGACCATCTTCCTCATCAGATGGAATATGGTCGTTCCTTCTTCGATGCGTCTCGCCACGCAGGTGCTGGCATTGCTTCGGGTCAAGTTCAAGCATTTAGCCAATTGTGGGCCTTGGCACAGCGCTGGAGAAGCGAAGCTGCTGGCGGAGACTACGAAACTTTTGGCGAGGAAAGCGAGCGATACCCAACTTAC…	MGCISSKPQVMSPSRHYSSPDAEPATARTSHRRSARYGELSGPPAQTGLTYYQQSLIGVARWPDPQYNQDHLPHQMEYGRSFFDASRHAGAGIASGQVQAFSQLWALAQRWRSEAAGGDYETFGEESERYPTYNHNPTTPLENQYAYILDRYRNREDGEFSEDVEGVPTNEFPLRDEIDGKPITLSTVVVSADPDANRYDSKYSALRHLEAGEPFYIRHTFSADVPEVLAHVEGLYNQALDASVSDSQALSILGEIHWWVANAMPDHRGSAAKTEFSVRAIAMARGMELPPMRHGIVADLEAMTTSREAFVRHYNNFFDR	963	320
PpeICMP3706_AvrB2f_1	PpeICMP3706	AvrB	AvrB	AvrB	AvrB2	15	73	78	ATGGGATGTATCTCATCGAAACCTCAGGTAATGTCTCCTTCCCGTCATTACTCTTCACCTGACGCGGAGCCTGCTACCGCTAGAACATCGCATCGTAGGTCAGCTCGTTATGGTGAATTATCGGGCCCTCCAGCACAAACCGGCTTAACGTATTATCAGCAATCGTTAATTGGCGTAGCTCGCTGGCCCGATCCTCAGTATAACCAAGACCATCTTCCTCATCAGATGGAATATGGTCGTTCCTTCTTCGATGCGTCTCGCCACGCAGGTGCTGGCATTGCTTCGGGTCAAGTTCAAGCATTTAGCCAATTGTGGGCCTTGGCACAGCGCTGGAGAAGCGAAGCTGCTGGCGGAGACTACGAAACTTTTGGCGAGGAAAGCGAGCGATACCCAACTTAC…	MGCISSKPQVMSPSRHYSSPDAEPATARTSHRRSARYGELSGPPAQTGLTYYQQSLIGVARWPDPQYNQDHLPHQMEYGRSFFDASRHAGAGIASGQVQAFSQLWALAQRWRSEAAGGDYETFGEESERYPTYNHNPTTPLENQYTYILDRYRNREDGEFSEDVEGVPTNEFPLRDEIDGKPITLSTVVVSADPDANRYDSKYSALRHLEAGEPFYIRHTFSADVPEVLAHVEGLYNQALDASVSDSQALSILGEIHWWVANAMPDHRGSAAKTEFSVRAIAMARGMELPPMRHGIVADLEAMTTSREAFVRHYNNFFDR	963	320
Psy0508_AvrB2f_1	Psy0508	AvrB	AvrB	AvrB	AvrB2	15	73	79	ATGGGATGTATCTCATCGAAACCTCAGGTAATGTCTCCTTCCCGTTATTACTCTTCGCCTGACGCGGAGCCTGCTACCGGTAGAACATCGCATCGTGGGTCAGCTCGTTATGGTGAATTATCAGGCCCTCCAGCACAAACCGGCTTAACTTATTATCAGCAATCGTTAATTGGCGTAGCTCGCTGGCCCGATCCTCAGTATAACCAGGACCATCTTCCTCATCAGATGGAATATGGTCGTTCCTTCTTCGATGCGTCTCGCCACGCAGGTGCTGGCATTGCTTCGGGTCAAGTTCAAGCATTTAGCCAATTGTGGGCCTTGGCACAGCGCTGGAGAAGCGAAGCTGCTGGCGGAGACTACGAAACTTTTGGCGAGGAAAGCGAGCGATACCCAACTTAC…	MGCISSKPQVMSPSRYYSSPDAEPATGRTSHRGSARYGELSGPPAQTGLTYYQQSLIGVARWPDPQYNQDHLPHQMEYGRSFFDASRHAGAGIASGQVQAFSQLWALAQRWRSEAAGGDYETFGEESERYPTYNHNPTTPLANQYAYILDRYRNREDGEFSEEIEGIPTHEFPLRDEIDGKPITLSTVVISAAPDANRYDSRYSALRHLEAGEPFYIRHTFSADVPEVLAHVEELYKQALDASVSDSQALSILGEIHWWVANAMPDHRGSAAKTEFSVRAIAMARGMELPPMRHGIVADLEAMTTSREAFVRHYNNFFDH	963	320
Psy0509_AvrB2f_1	Psy0509	AvrB	AvrB	AvrB	AvrB2	15	73	79	ATGGGATGTATCTCATCGAAACCTCAGGTAATGTCTCCTTCCCGTTATTACTCTTCGCCTGACGCGGAGCCTGCTACCGGTAGAACATCGCATCGTGGGTCAGCTCGTTATGGTGAATTATCAGGCCCTCCAGCACAAACCGGCTTAACTTATTATCAGCAATCGTTAATTGGCGTAGCTCGCTGGCCCGATCCTCAGTATAACCAGGACCATCTTCCTCATCAGATGGAATATGGTCGTTCCTTCTTCGATGCGTCTCGCCACGCAGGTGCTGGCATTGCTTCGGGTCAAGTTCAAGCATTTAGCCAATTGTGGGCCTTGGCACAGCGCTGGAGAAGCGAAGCTGCTGGCGGAGACTACGAAACTTTTGGCGAGGAAAGCGAGCGATACCCAACTTAC…	MGCISSKPQVMSPSRYYSSPDAEPATGRTSHRGSARYGELSGPPAQTGLTYYQQSLIGVARWPDPQYNQDHLPHQMEYGRSFFDASRHAGAGIASGQVQAFSQLWALAQRWRSEAAGGDYETFGEESERYPTYNHNPTTPLANQYAYILDRYRNREDGEFSEEIEGIPTHEFPLRDEIDGKPITLSTVVISAAPDANRYDSRYSALRHLEAGEPFYIRHTFSADVPEVLAHVEELYKQALDASVSDSQALSILGEIHWWVANAMPDHRGSAAKTEFSVRAIAMARGMELPPMRHGIVADLEAMTTSREAFVRHYNNFFDH	963	320
ParICMP4328_AvrB2g_1	ParICMP4328	AvrB	AvrB	AvrB	AvrB2	15	73	80	ATGGGTTGTGTTTCTTCAAATATGTCTGTTAGTTCGTCCGGCAGTTTTCGAGCAAGTAACCTAAATTCTTCAGATGAATTTAGAGCTGAATCCTCTAATGTGAATTCTACATCGAGATCGCCGAGATTCGGTGAGCTTAAAGGTCCACAAGTCAGCCGGTTGACCCAGCATCAACAATCTTTAGTCGGTGTGGCTCGTTGGCCTAGCTCTGATTTTAACAGAGATCATACGCCCTACCAGATGGAATATGGCCAATCTTTTTATCATAAAAGCCGGGAGTTGGGTGCGGCGATTGCCGGGGGGGATGTTAATAGTTTTAGTGAGGCTTGGGACGAGGCGCGTGATTGGAGAAGCGCCAGAGCCGGCAACGACGCGGAGGAATTTTCCAAGATTCGTGAT…	MGCVSSNMSVSSSGSFRASNLNSSDEFRAESSNVNSTSRSPRFGELKGPQVSRLTQHQQSLVGVARWPSSDFNRDHTPYQMEYGQSFYHKSRELGAAIAGGDVNSFSEAWDEARDWRSARAGNDAEEFSKIRDPNRAREFITPLTGPYEYIKDRHARRKDAEVGKPSRSLPKSKVFKIHGKIDGENFLLTCISISTDRHADRTKEPYPRLRRMGMNDIGEPNVILHTDAEHIPRILQHVEGLYGVATDATIPDAHALKTLAEIHWWAVHAVPDMRGSAAKAELCVRSIAQARGMDLPPMKLGIVPDLEALTMNLKDFVNSYEGFFDHS	987	328
ParICMP4457_AvrB2g_1	ParICMP4457	AvrB	AvrB	AvrB	AvrB2	15	73	80	ATGGGTTGTGTTTCTTCAAATATGTCTGTTAGTTCGTCCGGCAGTTTTCGAGCAAGTAACCTAAATTCTTCAGATGAATTTAGAGCTGAATCCTCTAATGTGAATTCTACATCGAGATCGCCGAGATTCGGTGAGCTTAAAGGTCCACAAGTCAGCCGGTTGACCCAGCATCAACAATCTTTAGTCGGTGTGGCTCGTTGGCCTAGCTCTGATTTTAACAGAGATCATACGCCCTACCAGATGGAATATGGCCAATCTTTTTATCATAAAAGCCGGGAGTTGGGTGCGGCGATTGCCGGGGGGGATGTTAATAGTTTTAGTGAGGCTTGGGACGAGGCGCGTGATTGGAGAAGCGCCAGAGCCGGCAACGACGCGGAGGAATTTTCCAAGATTCGTGAT…	MGCVSSNMSVSSSGSFRASNLNSSDEFRAESSNVNSTSRSPRFGELKGPQVSRLTQHQQSLVGVARWPSSDFNRDHTPYQMEYGQSFYHKSRELGAAIAGGDVNSFSEAWDEARDWRSARAGNDAEEFSKIRDPNRAREFITPLTGPYEYIKDRHARRKDAEVGKPSRSLPKSKVFKIHGKIDGENFLLTCISISTDRHADRTKEPYPRLRRMGMNDIGEPNVILHTDAEHIPRILQHVEGLYGVATDATIPDAHALKTLAEIHWWAVHAVPDMRGSAAKAELCVRSIAQARGMDLPPMKLGIVPDLEALTMNLKDFVNSYEGFFDHS	987	328
ParICMP4460_AvrB2g_1	ParICMP4460	AvrB	AvrB	AvrB	AvrB2	15	73	81	ATGGGTTGTGCATCTTCAAATATGTCGGTTAGTTCGTCTGGGAGTTTTCGAGCAAATAGTCTGAATTCTCCAGATCATTCTAGAGCTGAATACTCTAGTGTGAATTCTACATCGAGATCCCCAAGGTTCGGTGAGCTTAAAGGACCACAAGACAGCCGGTTAACTCAGCATCAACAATCGTTAGTCGGTGTGGCTCGTTGGCCTAGCTCTCATTTTAACAGAGATCATACGCCCTACCAGATGGAATATGGCCAATCTTTTTATCATAAAAGCCGGGAGTTGGGTGCGGCGATTGCCGGGGGGGATGTTAATAGTTTTAGTGAGGCTTGGGACGAGGCGCGTGATTGGAGAAGCGCCAGAGCCGGCAACGACGCGGAGGAATTTTCCAAGATTCGTGAT…	MGCASSNMSVSSSGSFRANSLNSPDHSRAEYSSVNSTSRSPRFGELKGPQDSRLTQHQQSLVGVARWPSSHFNRDHTPYQMEYGQSFYHKSRELGAAIAGGDVNSFSEAWDEARDWRSARAGNDAEEFSKIRDPNRAREFITPLTGPYEYIKDRHARRKDAEVGRPSRSLPKSKVFKIHGKIDGENFLLTCISISTDRHADRTKEPYPRLRRMGMNDIGEPNVILHTDAEHIPRILQHVEGLYGVATDATIPDAHALKTLAEIHWWAVHAVPDMRGSAAKAELCVRSIAQARGMDLPPMKLGIVPDLEALTMNLKDFVNSYEGFFDHS	987	328
PziICMP8921_AvrB2g_1	PziICMP8921	AvrB	AvrB	AvrB	AvrB2	15	73	82	ATGGGTTGTGTTTCTTCAAATATGTCTGTTAGTTCGTCCGGCAGTTTTCGAGCAAGTAACCTAAATTCTTCAGATGAATTTAGAGCTGAATCCTCTAATGTGAATTCTACATCGAGATCGCCGAGATTCGGTGAGCTTAAAGGTCCACAAGTCAGCCGGTTGACCCAGCATCAACAATCTTTAGTCGGTGTGGCTCGTTGGCCTAGCTCTCATTTTAACAGAGATCATACGCCCTACCAGATGGAATATGGCCAATCTTTTTATCATAAAAGCCGGGAGTTGGGTGCGGCGATTGCCGGGGGGGATGTTAATAGTTTTAGTGAGGCTTGGGACGAGGCGCGTGATTGGAGAAGCGCCAGAGCCGGCAACGACGCGGAGGAATTTTCCAAGATTCGTGAT…	MGCVSSNMSVSSSGSFRASNLNSSDEFRAESSNVNSTSRSPRFGELKGPQVSRLTQHQQSLVGVARWPSSHFNRDHTPYQMEYGQSFYHKSRELGAAIAGGDVNSFSEAWDEARDWRSARAGNDAEEFSKIRDPNRAREFITPLTGPYEYIKDRHARRKDAEVGRPSRSLPKSKVFKIHGKIDGENFLLTCISISTDRHADRTKEPYPRLRRMGMNDIGEPNVILHTDAEHIPRILQHVEGLYGVATDATIPDAHALKTLAEIHWWAVHAVPDMRGSAAKAELCVRSIAQARGMDLPPMKLGIVPDLEALTMNLKDFVNSYEGFFDHS	987	328
PziICMP8941_AvrB2g_1	PziICMP8941	AvrB	AvrB	AvrB	AvrB2	15	73	83	ATGGGTTGTGTTTCTTCAAATATGTCTGTTAGTTCGTCCGGCAGTTTTCGAGCAAGTAACCTAAATTCTTCAGATGAATTTAGAGCTGAATCCTCTAATGTGAATTCTACATCGAGATCGCCGAGATTCGGTGAGCTTAAAGGTCCACAAGTCAGCCGGTTGACCCAGCATCAACAATCTTTAGTCGGTGTGGCTCGTTGGCCTAGCTCTCATTTTAACAGAGATCATACGCCCTACCAGATGGAATATGGCCAATCTTTTTATCATAAAAGCCGGGAGTTGGGTGCGGCGATTGCCGGGGGGGATGTTAATAGTTTTAGTGAGGCTTGGGACGAGGCGCGTGATTGGAGAAGCGCCAGAGCCGGCAACGACGCGGAGGAATTTTCCAAGATTCGTGAT…	MGCVSSNMSVSSSGSFRASNLNSSDEFRAESSNVNSTSRSPRFGELKGPQVSRLTQHQQSLVGVARWPSSHFNRDHTPYQMEYGQSFYHKSRELGAAIAGGDVNSFSEAWDEARDWRSARAGNDAEEFSKIRDPNRAREFITPLTGPYEYIKDRHARRKDAEVGRPSRSLPKSKVFKIHGKIDGENFLLTCISISTDRHADRTKEPYPRLRRMGMNDIGEPNVILHTDAEHIPRILQHVEGLYGVATDATIPDAHALKTLAEIHWWAVHAVPDMRGSAAKAELCVRSIAQARGMDLPPMKLGIVPDLEALTMNLRDFVNSYEGFFDHS	987	328
PziICMP8944_AvrB2g_1	PziICMP8944	AvrB	AvrB	AvrB	AvrB2	15	73	83	ATGGGTTGTGTTTCTTCAAATATGTCTGTTAGTTCGTCCGGCAGTTTTCGAGCAAGTAACCTAAATTCTTCAGATGAATTTAGAGCTGAATCCTCTAATGTGAATTCTACATCGAGATCGCCGAGATTCGGTGAGCTTAAAGGTCCACAAGTCAGCCGGTTGACCCAGCATCAACAATCTTTAGTCGGTGTGGCTCGTTGGCCTAGCTCTCATTTTAACAGAGATCATACGCCCTACCAGATGGAATATGGCCAATCTTTTTATCATAAAAGCCGGGAGTTGGGTGCGGCGATTGCCGGGGGGGATGTTAATAGTTTTAGTGAGGCTTGGGACGAGGCGCGTGATTGGAGAAGCGCCAGAGCCGGCAACGACGCGGAGGAATTTTCCAAGATTCGTGAT…	MGCVSSNMSVSSSGSFRASNLNSSDEFRAESSNVNSTSRSPRFGELKGPQVSRLTQHQQSLVGVARWPSSHFNRDHTPYQMEYGQSFYHKSRELGAAIAGGDVNSFSEAWDEARDWRSARAGNDAEEFSKIRDPNRAREFITPLTGPYEYIKDRHARRKDAEVGRPSRSLPKSKVFKIHGKIDGENFLLTCISISTDRHADRTKEPYPRLRRMGMNDIGEPNVILHTDAEHIPRILQHVEGLYGVATDATIPDAHALKTLAEIHWWAVHAVPDMRGSAAKAELCVRSIAQARGMDLPPMKLGIVPDLEALTMNLRDFVNSYEGFFDHS	987	328
PseHC_1_AvrB2h_1	PseHC_1	AvrB	AvrB	AvrB	AvrB2	15	73	84	ATGCCATACCAGCAGGCATTGATTGGTGTGGCCCGTTGGCCAGACTCGCATTTCAACAGAGATGATGCGCCGCACCAAATGGAATACGGTCAATCGTTTTACAATAAAAGCAGGGAGCTGGGTGAGTCTGTTGCTAGCGGACAAATAGGCTCGTTTGGGGAACTCTGGGGCGAGGCGCGTGACTGGAGCACCCTCCAGAGCGGGTGCTGA	MPYQQALIGVARWPDSHFNRDDAPHQMEYGQSFYNKSRELGESVASGQIGSFGELWGEARDWSTLQSGC	210	69
PseICMP3386_AvrB2h_1	PseICMP3386	AvrB	AvrB	AvrB	AvrB2	15	73	84	ATGCCATACCAGCAGGCATTGATTGGTGTGGCCCGTTGGCCAGACTCGCATTTCAACAGAGATGATGCGCCGCACCAAATGGAATACGGTCAATCGTTTTACAATAAAAGCAGGGAGCTGGGTGAGTCTGTTGCTAGCGGACAAATAGGCTCGTTTGGGGAACTCTGGGGCGAGGCGCGTGACTGGAGCACCCTCCAGAGCGGGTGCTGA	MPYQQALIGVARWPDSHFNRDDAPHQMEYGQSFYNKSRELGESVASGQIGSFGELWGEARDWSTLQSGC	210	69
PseICMP4995_AvrB2h_1	PseICMP4995	AvrB	AvrB	AvrB	AvrB2	15	73	84	ATGCCATACCAGCAGGCATTGATTGGTGTGGCCCGTTGGCCAGACTCGCATTTCAACAGAGATGATGCGCCGCACCAAATGGAATACGGTCAATCGTTTTACAATAAAAGCAGGGAGCTGGGTGAGTCTGTTGCTAGCGGACAAATAGGCTCGTTTGGGGAACTCTGGGGCGAGGCGCGTGACTGGAGCACCCTCCAGAGCGGGTGCTGA	MPYQQALIGVARWPDSHFNRDDAPHQMEYGQSFYNKSRELGESVASGQIGSFGELWGEARDWSTLQSGC	210	69
PseICMP7459_AvrB2h_1	PseICMP7459	AvrB	AvrB	AvrB	AvrB2	15	73	84	ATGCCATACCAGCAGGCATTGATTGGTGTGGCCCGTTGGCCAGACTCGCATTTCAACAGAGATGATGCGCCGCACCAAATGGAATACGGTCAATCGTTTTACAATAAAAGCAGGGAGCTGGGTGAGTCTGTTGCTAGCGGACAAATAGGCTCGTTTGGGGAACTCTGGGGCGAGGCGCGTGACTGGAGCACCCTCCAGAGCGGGTGCTGA	MPYQQALIGVARWPDSHFNRDDAPHQMEYGQSFYNKSRELGESVASGQIGSFGELWGEARDWSTLQSGC	210	69
PseICMP763_AvrB2h_1	PseICMP763	AvrB	AvrB	AvrB	AvrB2	15	73	84	ATGCCATACCAGCAGGCATTGATTGGTGTGGCCCGTTGGCCAGACTCGCATTTCAACAGAGATGATGCGCCGCACCAAATGGAATACGGTCAATCGTTTTACAATAAAAGCAGGGAGCTGGGTGAGTCTGTTGCTAGCGGACAAATAGGCTCGTTTGGGGAACTCTGGGGCGAGGCGCGTGACTGGAGCACCCTCCAGAGCGGGTGCTGA	MPYQQALIGVARWPDSHFNRDDAPHQMEYGQSFYNKSRELGESVASGQIGSFGELWGEARDWSTLQSGC	210	69
PseICMP7459_AvrB2i_1	PseICMP7459	AvrB	AvrB	AvrB	AvrB2	15	73	85	TTGGTGGATGGCGCACGCCATGCCAGACCAGCGGGCAGTGCTGCTAAAACTGAATTGTGTGTGCGCTCCATTGCCCAAGCAAGGGGCATGGACCTGCCGCCGATGATGCTAGGTATCGTGCCGGATCTGGAGGCTCTTACAATGCCTCTGAAGGACTTTGTAAAAAGTTACGAAGGTTTCTTCGAAGATAGCTGA	MVDGARHARPAGSAAKTELCVRSIAQARGMDLPPMMLGIVPDLEALTMPLKDFVKSYEGFFEDS	195	64
PseICMP763_AvrB2i_1	PseICMP763	AvrB	AvrB	AvrB	AvrB2	15	73	85	TTGGTGGATGGCGCACGCCATGCCAGACCAGCGGGCAGTGCTGCTAAAACTGAATTGTGTGTGCGCTCCATTGCCCAAGCAAGGGGCATGGACCTGCCGCCGATGATGCTAGGTATCGTGCCGGATCTGGAGGCTCTTACAATGCCTCTGAAGGACTTTGTAAAAAGTTACGAAGGTTTCTTCGAAGATAGCTGA	MVDGARHARPAGSAAKTELCVRSIAQARGMDLPPMMLGIVPDLEALTMPLKDFVKSYEGFFEDS	195	64
PamICMP3918_AvrB2j_1	PamICMP3918	AvrB	AvrB	AvrB	AvrB2	15	73	86	ATGGAATACGGTCAATCGTTTTACAATAAAAGCAGGGAGCTGGGTGAGTCTGTTGCTAGCGGACAAATAGGCTCGTTTGGGGAACTCTGGGGCGAGGCGCGTGACTGGAGAGCCTCCAGAGCGGGTGCTGATGCCAATGTGTTTCTTAGCCCCAGGGATCCCAATGCCAATCGCGAATATGCTACGCCTCTTGCGGAACAGTACAGCTATATAAAAAACAAATTCGCGCACCGCAAAGACGGTGAGGTCGGCAGGCCTGCGAATTTTCTTCCCAAAAGTAAAACGTTCAGATTCAGTGGGGAAATTGACGGCGAAAAGATACCTCTCACGCGTATTACAGTGAGTAAATATCTGCACGCAGACAGAATGGCAGATCCTTATCCACGTTTACGAGGTCAA…	MEYGQSFYNKSRELGESVASGQIGSFGELWGEARDWRASRAGADANVFLSPRDPNANREYATPLAEQYSYIKNKFAHRKDGEVGRPANFLPKSKTFRFSGEIDGEKIPLTRITVSKYLHADRMADPYPRLRGQRLGDLGEPNVMSHTSAEFVPQIMSHVENLYQSATDASVSDNRALKTLAEIH	555	184
PmeICMP5711_AvrB2j_1	PmeICMP5711	AvrB	AvrB	AvrB	AvrB2	15	73	86	ATGGAATACGGTCAATCGTTTTACAATAAAAGCAGGGAGCTGGGTGAGTCTGTTGCTAGCGGACAAATAGGCTCGTTTGGGGAACTCTGGGGCGAGGCGCGTGACTGGAGAGCCTCCAGAGCGGGTGCTGATGCCAATGTGTTTCTTAGCCCCAGGGATCCCAATGCCAATCGCGAATATGCTACGCCTCTTGCGGAACAGTACAGCTATATAAAAAACAAATTCGCGCACCGCAAAGACGGTGAGGTCGGCAGGCCTGCGAATTTTCTTCCCAAAAGTAAAACGTTCAGATTCAGTGGGGAAATTGACGGCGAAAAGATACCTCTCACGCGTATTACAGTGAGTAAATATCTGCACGCAGACAGAATGGCAGATCCTTATCCACGTTTACGAGGTCAA…	MEYGQSFYNKSRELGESVASGQIGSFGELWGEARDWRASRAGADANVFLSPRDPNANREYATPLAEQYSYIKNKFAHRKDGEVGRPANFLPKSKTFRFSGEIDGEKIPLTRITVSKYLHADRMADPYPRLRGQRLGDLGEPNVMSHTSAEFVPQIMSHVENLYQSATDASVSDNRALKTLAEIH	555	184
PamICMP3918_AvrB2k_1	PamICMP3918	AvrB	AvrB	AvrB	AvrB2	15	73	87	ATGGCGCACGCCATGCCAGACCAGCGCGGCAGTGCTGCTAAAACTGAATTGTGTGTGCGCTCCATTGCCCAGGCAAGGGGCATGGACCTGCCGCCGATGATGCTAGGTATCGTGCCGGATCTGGAGGCTCTTACAATGCCTTTGAAGGACTTTGTAAAAAGTTACGAAGGTTTCTTCGAAGATAGCTGA	MAHAMPDQRGSAAKTELCVRSIAQARGMDLPPMMLGIVPDLEALTMPLKDFVKSYEGFFEDS	189	62
PmeICMP5711_AvrB2k_1	PmeICMP5711	AvrB	AvrB	AvrB	AvrB2	15	73	87	ATGGCGCACGCCATGCCAGACCAGCGCGGCAGTGCTGCTAAAACTGAATTGTGTGTGCGCTCCATTGCCCAGGCAAGGGGCATGGACCTGCCGCCGATGATGCTAGGTATCGTGCCGGATCTGGAGGCTCTTACAATGCCTTTGAAGGACTTTGTAAAAAGTTACGAAGGTTTCTTCGAAGATAGCTGA	MAHAMPDQRGSAAKTELCVRSIAQARGMDLPPMMLGIVPDLEALTMPLKDFVKSYEGFFEDS	189	62
Psy0533_AvrE1a_1	Psy0533	AvrE	AvrE	AvrE	AvrE1	17	NA	88	GTGCATTCATCCTCGATCCACCGCAACACCGGATGCATCATTCAGCCGCCAGCCCCGGCAAACACGAACGCTGCAACTGATCTACAGCAAAAAATCGAACAACCCAAACAACGCTCCTCCCACTCACTGAGCAGTGTCGGCAAGCGAGCGCTGAAGAACGTCAGCAAACTGTTCCAGAAATCCAAGGCACCGCAGCAGAAAGCGGCCACGCCTCCCACCGTAAAAAACGTCAAGCCTTCACAGCCCACTCCAAATGCGAAGACAGCCAAAGATAAAGCGCCTGTATCTCAGTTATCGAGCAATAGTCTTGATGACCTGGACGATACGCGCCAGCCAGTAACGCGTGCGGGGCATAGCGGCGCCAGCACTTGTGGCACCAAAGCCCAAGACCCGGACGAG…	MHSSSIHRNTGCIIQPPAPANTNAATDLQQKIEQPKQRSSHSLSSVGKRALKNVSKLFQKSKAPQQKAATPPTVKNVKPSQPTPNAKTAKDKAPVSQLSSNSLDDLDDTRQPVTRAGHSGASTCGTKAQDPDEPATLQSSRQSMMTRSNGGRFELKDEKLVRNSEPQGSIQLDAKGKPDFSTFNTPGLAPLLDSILATPRQTYLAHQSKDGVHGHQLLQANGHLLHLAQDDSSLALIRSSKEALHIEGKKPPAVKLEREDGNIHIDTASGRKTQELPGKAHIAHITGVLLRHDGERMRVHEDRLYQFDPLSARWKAPEGTEDIAFNSLATGGKGSVYAKSDDVVVDLTSPFMPHIEVKDLQSFSVAPDNRAALLSGKETQAILLTDMSPVIGDLTEKKT…	5145	1714
PgyICMP2185_AvrE1a_1	PgyICMP2185	AvrE	AvrE	AvrE	AvrE1	17	NA	88	GTGCATTCATCCTCGATCCACCGCAACACCGGATGCATCATTCAGCCGCCAGCCCCGGCAAACACGAACGCTGCAACTGATCTACAGCAAAAAATCGAACAACCCAAACAACGCTCCTCCCACTCACTGAGCAGTGTCGGCAAGCGAGCGCTGAAGAACGTCAGCAAACTGTTCCAGAAATCCAAGGCACCGCAGCAGAAAGCGGCCACGCCTCCCACCGTAAAAAACGTCAAGCCTTCACAGCCCACTCCAAATGCGAAGACAGCCAAAGATAAAGCGCCTGTATCTCAGTTATCGAGCAATAGTCTTGATGACCTGGACGATACGCGCCAGCCAGTAACGCGTGCGGGGCATAGCGGCGCCAGCACTTGTGGCACCAAAGCCCAAGACCCGGACGAG…	MHSSSIHRNTGCIIQPPAPANTNAATDLQQKIEQPKQRSSHSLSSVGKRALKNVSKLFQKSKAPQQKAATPPTVKNVKPSQPTPNAKTAKDKAPVSQLSSNSLDDLDDTRQPVTRAGHSGASTCGTKAQDPDEPATLQSSRQSMMTRSNGGRFELKDEKLVRNSEPQGSIQLDAKGKPDFSTFNTPGLAPLLDSILATPRQTYLAHQSKDGVHGHQLLQANGHLLHLAQDDSSLALIRSSKEALHIEGKKPPAVKLEREDGNIHIDTASGRKTQELPGKAHIAHITGVLLRHDGERMRVHEDRLYQFDPLSARWKAPEGTEDIAFNSLATGGKGSVYAKSDDVVVDLTSPFMPHIEVKDLQSFSVAPDNRAALLSGKETQAILLTDMSPVIGDLTEKKT…	5145	1714
PmeN6801_AvrE1a_1	PmeN6801	AvrE	AvrE	AvrE	AvrE1	17	NA	88	GTGCATTCATCCTCGATCCACCGCAACACCGGATGCATCATTCAGCCGCCAGCCCCGGCAAACACGAACGCTGCAACTGATCTACAGCAAAAAATCGAACAACCCAAACAACGCTCCTCCCACTCACTGAGCAGTGTCGGCAAGCGAGCGCTGAAGAACGTCAGCAAACTGTTCCAGAAATCCAAGGCACCGCAGCAGAAAGCGGCCACGCCTCCCACCGTAAAAAACGTCAAGCCTTCACAGCCCACTCCAAATGCGAAGACAGCCAAAGATAAAGCGCCTGTATCTCAGTTATCGAGCAATAGTCTTGATGACCTGGACGATACGCGCCAGCCAGTAACGCGTGCGGGGCATAGCGGCGCCAGCACTTGTGGCACCAAAGCCCAAGACCCGGACGAG…	MHSSSIHRNTGCIIQPPAPANTNAATDLQQKIEQPKQRSSHSLSSVGKRALKNVSKLFQKSKAPQQKAATPPTVKNVKPSQPTPNAKTAKDKAPVSQLSSNSLDDLDDTRQPVTRAGHSGASTCGTKAQDPDEPATLQSSRQSMMTRSNGGRFELKDEKLVRNSEPQGSIQLDAKGKPDFSTFNTPGLAPLLDSILATPRQTYLAHQSKDGVHGHQLLQANGHLLHLAQDDSSLALIRSSKEALHIEGKKPPAVKLEREDGNIHIDTASGRKTQELPGKAHIAHITGVLLRHDGERMRVHEDRLYQFDPLSARWKAPEGTEDIAFNSLATGGKGSVYAKSDDVVVDLTSPFMPHIEVKDLQSFSVAPDNRAALLSGKETQAILLTDMSPVIGDLTEKKT…	5145	1714
Pph1302A_AvrE1a_1	Pph1302A	AvrE	AvrE	AvrE	AvrE1	17	NA	88	GTGCATTCATCCTCGATCCACCGCAACACCGGATGCATCATTCAGCCGCCAGCCCCGGCAAACACGAACGCTGCAACTGATCTACAGCAAAAAATCGAACAACCCAAACAACGCTCCTCCCACTCACTGAGCAGTGTCGGCAAGCGAGCGCTGAAGAACGTCAGCAAACTGTTCCAGAAATCCAAGGCACCGCAGCAGAAAGCGGCCACGCCTCCCACCGTAAAAAACGTCAAGCCTTCACAGCCCACTCCAAATGCGAAGACAGCCAAAGATAAAGCGCCTGTATCTCAGTTATCGAGCAATAGTCTTGATGACCTGGACGATACGCGCCAGCCAGTAACGCGTGCGGGGCATAGCGGCGCCAGCACTTGTGGCACCAAAGCCCAAGACCCGGACGAG…	MHSSSIHRNTGCIIQPPAPANTNAATDLQQKIEQPKQRSSHSLSSVGKRALKNVSKLFQKSKAPQQKAATPPTVKNVKPSQPTPNAKTAKDKAPVSQLSSNSLDDLDDTRQPVTRAGHSGASTCGTKAQDPDEPATLQSSRQSMMTRSNGGRFELKDEKLVRNSEPQGSIQLDAKGKPDFSTFNTPGLAPLLDSILATPRQTYLAHQSKDGVHGHQLLQANGHLLHLAQDDSSLALIRSSKEALHIEGKKPPAVKLEREDGNIHIDTASGRKTQELPGKAHIAHITGVLLRHDGERMRVHEDRLYQFDPLSARWKAPEGTEDIAFNSLATGGKGSVYAKSDDVVVDLTSPFMPHIEVKDLQSFSVAPDNRAALLSGKETQAILLTDMSPVIGDLTEKKT…	5145	1714
Pph1448A_AvrE1a_1	Pph1448A	AvrE	AvrE	AvrE	AvrE1	17	NA	88	GTGCATTCATCCTCGATCCACCGCAACACCGGATGCATCATTCAGCCGCCAGCCCCGGCAAACACGAACGCTGCAACTGATCTACAGCAAAAAATCGAACAACCCAAACAACGCTCCTCCCACTCACTGAGCAGTGTCGGCAAGCGAGCGCTGAAGAACGTCAGCAAACTGTTCCAGAAATCCAAGGCACCGCAGCAGAAAGCGGCCACGCCTCCCACCGTAAAAAACGTCAAGCCTTCACAGCCCACTCCAAATGCGAAGACAGCCAAAGATAAAGCGCCTGTATCTCAGTTATCGAGCAATAGTCTTGATGACCTGGACGATACGCGCCAGCCAGTAACGCGTGCGGGGCATAGCGGCGCCAGCACTTGTGGCACCAAAGCCCAAGACCCGGACGAG…	MHSSSIHRNTGCIIQPPAPANTNAATDLQQKIEQPKQRSSHSLSSVGKRALKNVSKLFQKSKAPQQKAATPPTVKNVKPSQPTPNAKTAKDKAPVSQLSSNSLDDLDDTRQPVTRAGHSGASTCGTKAQDPDEPATLQSSRQSMMTRSNGGRFELKDEKLVRNSEPQGSIQLDAKGKPDFSTFNTPGLAPLLDSILATPRQTYLAHQSKDGVHGHQLLQANGHLLHLAQDDSSLALIRSSKEALHIEGKKPPAVKLEREDGNIHIDTASGRKTQELPGKAHIAHITGVLLRHDGERMRVHEDRLYQFDPLSARWKAPEGTEDIAFNSLATGGKGSVYAKSDDVVVDLTSPFMPHIEVKDLQSFSVAPDNRAALLSGKETQAILLTDMSPVIGDLTEKKT…	5145	1714
PphICMP2740_AvrE1a_1	PphICMP2740	AvrE	AvrE	AvrE	AvrE1	17	NA	88	GTGCATTCATCCTCGATCCACCGCAACACCGGATGCATCATTCAGCCGCCAGCCCCGGCAAACACGAACGCTGCAACTGATCTACAGCAAAAAATCGAACAACCCAAACAACGCTCCTCCCACTCACTGAGCAGTGTCGGCAAGCGAGCGCTGAAGAACGTCAGCAAACTGTTCCAGAAATCCAAGGCACCGCAGCAGAAAGCGGCCACGCCTCCCACCGTAAAAAACGTCAAGCCTTCACAGCCCACTCCAAATGCGAAGACAGCCAAAGATAAAGCGCCTGTATCTCAGTTATCGAGCAATAGTCTTGATGACCTGGACGATACGCGCCAGCCAGTAACGCGTGCGGGGCATAGCGGCGCCAGCACTTGTGGCACCAAAGCCCAAGACCCGGACGAG…	MHSSSIHRNTGCIIQPPAPANTNAATDLQQKIEQPKQRSSHSLSSVGKRALKNVSKLFQKSKAPQQKAATPPTVKNVKPSQPTPNAKTAKDKAPVSQLSSNSLDDLDDTRQPVTRAGHSGASTCGTKAQDPDEPATLQSSRQSMMTRSNGGRFELKDEKLVRNSEPQGSIQLDAKGKPDFSTFNTPGLAPLLDSILATPRQTYLAHQSKDGVHGHQLLQANGHLLHLAQDDSSLALIRSSKEALHIEGKKPPAVKLEREDGNIHIDTASGRKTQELPGKAHIAHITGVLLRHDGERMRVHEDRLYQFDPLSARWKAPEGTEDIAFNSLATGGKGSVYAKSDDVVVDLTSPFMPHIEVKDLQSFSVAPDNRAALLSGKETQAILLTDMSPVIGDLTEKKT…	5145	1714
PphICMP637_AvrE1a_1	PphICMP637	AvrE	AvrE	AvrE	AvrE1	17	NA	88	GTGCATTCATCCTCGATCCACCGCAACACCGGATGCATCATTCAGCCGCCAGCCCCGGCAAACACGAACGCTGCAACTGATCTACAGCAAAAAATCGAACAACCCAAACAACGCTCCTCCCACTCACTGAGCAGTGTCGGCAAGCGAGCGCTGAAGAACGTCAGCAAACTGTTCCAGAAATCCAAGGCACCGCAGCAGAAAGCGGCCACGCCTCCCACCGTAAAAAACGTCAAGCCTTCACAGCCCACTCCAAATGCGAAGACAGCCAAAGATAAAGCGCCTGTATCTCAGTTATCGAGCAATAGTCTTGATGACCTGGACGATACGCGCCAGCCAGTAACGCGTGCGGGGCATAGCGGCGCCAGCACTTGTGGCACCAAAGCCCAAGACCCGGACGAG…	MHSSSIHRNTGCIIQPPAPANTNAATDLQQKIEQPKQRSSHSLSSVGKRALKNVSKLFQKSKAPQQKAATPPTVKNVKPSQPTPNAKTAKDKAPVSQLSSNSLDDLDDTRQPVTRAGHSGASTCGTKAQDPDEPATLQSSRQSMMTRSNGGRFELKDEKLVRNSEPQGSIQLDAKGKPDFSTFNTPGLAPLLDSILATPRQTYLAHQSKDGVHGHQLLQANGHLLHLAQDDSSLALIRSSKEALHIEGKKPPAVKLEREDGNIHIDTASGRKTQELPGKAHIAHITGVLLRHDGERMRVHEDRLYQFDPLSARWKAPEGTEDIAFNSLATGGKGSVYAKSDDVVVDLTSPFMPHIEVKDLQSFSVAPDNRAALLSGKETQAILLTDMSPVIGDLTEKKT…	5145	1714
PphKN86_AvrE1a_1	PphKN86	AvrE	AvrE	AvrE	AvrE1	17	NA	88	GTGCATTCATCCTCGATCCACCGCAACACCGGATGCATCATTCAGCCGCCAGCCCCGGCAAACACGAACGCTGCAACTGATCTACAGCAAAAAATCGAACAACCCAAACAACGCTCCTCCCACTCACTGAGCAGTGTCGGCAAGCGAGCGCTGAAGAACGTCAGCAAACTGTTCCAGAAATCCAAGGCACCGCAGCAGAAAGCGGCCACGCCTCCCACCGTAAAAAACGTCAAGCCTTCACAGCCCACTCCAAATGCGAAGACAGCCAAAGATAAAGCGCCTGTATCTCAGTTATCGAGCAATAGTCTTGATGACCTGGACGATACGCGCCAGCCAGTAACGCGTGCGGGGCATAGCGGCGCCAGCACTTGTGGCACCAAAGCCCAAGACCCGGACGAG…	MHSSSIHRNTGCIIQPPAPANTNAATDLQQKIEQPKQRSSHSLSSVGKRALKNVSKLFQKSKAPQQKAATPPTVKNVKPSQPTPNAKTAKDKAPVSQLSSNSLDDLDDTRQPVTRAGHSGASTCGTKAQDPDEPATLQSSRQSMMTRSNGGRFELKDEKLVRNSEPQGSIQLDAKGKPDFSTFNTPGLAPLLDSILATPRQTYLAHQSKDGVHGHQLLQANGHLLHLAQDDSSLALIRSSKEALHIEGKKPPAVKLEREDGNIHIDTASGRKTQELPGKAHIAHITGVLLRHDGERMRVHEDRLYQFDPLSARWKAPEGTEDIAFNSLATGGKGSVYAKSDDVVVDLTSPFMPHIEVKDLQSFSVAPDNRAALLSGKETQAILLTDMSPVIGDLTEKKT…	5145	1714
Psy0506_AvrE1a_1	Psy0506	AvrE	AvrE	AvrE	AvrE1	17	NA	88	GTGCATTCATCCTCGATCCACCGCAACACCGGATGCATCATTCAGCCGCCAGCCCCGGCAAACACGAACGCTGCAACTGATCTACAGCAAAAAATCGAACAACCCAAACAACGCTCCTCCCACTCACTGAGCAGTGTCGGCAAGCGAGCGCTGAAGAACGTCAGCAAACTGTTCCAGAAATCCAAGGCACCGCAGCAGAAAGCGGCCACGCCTCCCACCGTAAAAAACGTCAAGCCTTCACAGCCCACTCCAAATGCGAAGACAGCCAAAGATAAAGCGCCTGTATCTCAGTTATCGAGCAATAGTCTTGATGACCTGGACGATACGCGCCAGCCAGTAACGCGTGCGGGGCATAGCGGCGCCAGCACTTGTGGCACCAAAGCCCAAGACCCGGACGAG…	MHSSSIHRNTGCIIQPPAPANTNAATDLQQKIEQPKQRSSHSLSSVGKRALKNVSKLFQKSKAPQQKAATPPTVKNVKPSQPTPNAKTAKDKAPVSQLSSNSLDDLDDTRQPVTRAGHSGASTCGTKAQDPDEPATLQSSRQSMMTRSNGGRFELKDEKLVRNSEPQGSIQLDAKGKPDFSTFNTPGLAPLLDSILATPRQTYLAHQSKDGVHGHQLLQANGHLLHLAQDDSSLALIRSSKEALHIEGKKPPAVKLEREDGNIHIDTASGRKTQELPGKAHIAHITGVLLRHDGERMRVHEDRLYQFDPLSARWKAPEGTEDIAFNSLATGGKGSVYAKSDDVVVDLTSPFMPHIEVKDLQSFSVAPDNRAALLSGKETQAILLTDMSPVIGDLTEKKT…	5145	1714
Psy0507_AvrE1a_1	Psy0507	AvrE	AvrE	AvrE	AvrE1	17	NA	88	GTGCATTCATCCTCGATCCACCGCAACACCGGATGCATCATTCAGCCGCCAGCCCCGGCAAACACGAACGCTGCAACTGATCTACAGCAAAAAATCGAACAACCCAAACAACGCTCCTCCCACTCACTGAGCAGTGTCGGCAAGCGAGCGCTGAAGAACGTCAGCAAACTGTTCCAGAAATCCAAGGCACCGCAGCAGAAAGCGGCCACGCCTCCCACCGTAAAAAACGTCAAGCCTTCACAGCCCACTCCAAATGCGAAGACAGCCAAAGATAAAGCGCCTGTATCTCAGTTATCGAGCAATAGTCTTGATGACCTGGACGATACGCGCCAGCCAGTAACGCGTGCGGGGCATAGCGGCGCCAGCACTTGTGGCACCAAAGCCCAAGACCCGGACGAG…	MHSSSIHRNTGCIIQPPAPANTNAATDLQQKIEQPKQRSSHSLSSVGKRALKNVSKLFQKSKAPQQKAATPPTVKNVKPSQPTPNAKTAKDKAPVSQLSSNSLDDLDDTRQPVTRAGHSGASTCGTKAQDPDEPATLQSSRQSMMTRSNGGRFELKDEKLVRNSEPQGSIQLDAKGKPDFSTFNTPGLAPLLDSILATPRQTYLAHQSKDGVHGHQLLQANGHLLHLAQDDSSLALIRSSKEALHIEGKKPPAVKLEREDGNIHIDTASGRKTQELPGKAHIAHITGVLLRHDGERMRVHEDRLYQFDPLSARWKAPEGTEDIAFNSLATGGKGSVYAKSDDVVVDLTSPFMPHIEVKDLQSFSVAPDNRAALLSGKETQAILLTDMSPVIGDLTEKKT…	5145	1714
Psy0508_AvrE1a_1	Psy0508	AvrE	AvrE	AvrE	AvrE1	17	NA	88	GTGCATTCATCCTCGATCCACCGCAACACCGGATGCATCATTCAGCCGCCAGCCCCGGCAAACACGAACGCTGCAACTGATCTACAGCAAAAAATCGAACAACCCAAACAACGCTCCTCCCACTCACTGAGCAGTGTCGGCAAGCGAGCGCTGAAGAACGTCAGCAAACTGTTCCAGAAATCCAAGGCACCGCAGCAGAAAGCGGCCACGCCTCCCACCGTAAAAAACGTCAAGCCTTCACAGCCCACTCCAAATGCGAAGACAGCCAAAGATAAAGCGCCTGTATCTCAGTTATCGAGCAATAGTCTTGATGACCTGGACGATACGCGCCAGCCAGTAACGCGTGCGGGGCATAGCGGCGCCAGCACTTGTGGCACCAAAGCCCAAGACCCGGACGAG…	MHSSSIHRNTGCIIQPPAPANTNAATDLQQKIEQPKQRSSHSLSSVGKRALKNVSKLFQKSKAPQQKAATPPTVKNVKPSQPTPNAKTAKDKAPVSQLSSNSLDDLDDTRQPVTRAGHSGASTCGTKAQDPDEPATLQSSRQSMMTRSNGGRFELKDEKLVRNSEPQGSIQLDAKGKPDFSTFNTPGLAPLLDSILATPRQTYLAHQSKDGVHGHQLLQANGHLLHLAQDDSSLALIRSSKEALHIEGKKPPAVKLEREDGNIHIDTASGRKTQELPGKAHIAHITGVLLRHDGERMRVHEDRLYQFDPLSARWKAPEGTEDIAFNSLATGGKGSVYAKSDDVVVDLTSPFMPHIEVKDLQSFSVAPDNRAALLSGKETQAILLTDMSPVIGDLTEKKT…	5145	1714
Psy0509_AvrE1a_1	Psy0509	AvrE	AvrE	AvrE	AvrE1	17	NA	88	GTGCATTCATCCTCGATCCACCGCAACACCGGATGCATCATTCAGCCGCCAGCCCCGGCAAACACGAACGCTGCAACTGATCTACAGCAAAAAATCGAACAACCCAAACAACGCTCCTCCCACTCACTGAGCAGTGTCGGCAAGCGAGCGCTGAAGAACGTCAGCAAACTGTTCCAGAAATCCAAGGCACCGCAGCAGAAAGCGGCCACGCCTCCCACCGTAAAAAACGTCAAGCCTTCACAGCCCACTCCAAATGCGAAGACAGCCAAAGATAAAGCGCCTGTATCTCAGTTATCGAGCAATAGTCTTGATGACCTGGACGATACGCGCCAGCCAGTAACGCGTGCGGGGCATAGCGGCGCCAGCACTTGTGGCACCAAAGCCCAAGACCCGGACGAG…	MHSSSIHRNTGCIIQPPAPANTNAATDLQQKIEQPKQRSSHSLSSVGKRALKNVSKLFQKSKAPQQKAATPPTVKNVKPSQPTPNAKTAKDKAPVSQLSSNSLDDLDDTRQPVTRAGHSGASTCGTKAQDPDEPATLQSSRQSMMTRSNGGRFELKDEKLVRNSEPQGSIQLDAKGKPDFSTFNTPGLAPLLDSILATPRQTYLAHQSKDGVHGHQLLQANGHLLHLAQDDSSLALIRSSKEALHIEGKKPPAVKLEREDGNIHIDTASGRKTQELPGKAHIAHITGVLLRHDGERMRVHEDRLYQFDPLSARWKAPEGTEDIAFNSLATGGKGSVYAKSDDVVVDLTSPFMPHIEVKDLQSFSVAPDNRAALLSGKETQAILLTDMSPVIGDLTEKKT…	5145	1714
Psy0510_AvrE1a_1	Psy0510	AvrE	AvrE	AvrE	AvrE1	17	NA	88	GTGCATTCATCCTCGATCCACCGCAACACCGGATGCATCATTCAGCCGCCAGCCCCGGCAAACACGAACGCTGCAACTGATCTACAGCAAAAAATCGAACAACCCAAACAACGCTCCTCCCACTCACTGAGCAGTGTCGGCAAGCGAGCGCTGAAGAACGTCAGCAAACTGTTCCAGAAATCCAAGGCACCGCAGCAGAAAGCGGCCACGCCTCCCACCGTAAAAAACGTCAAGCCTTCACAGCCCACTCCAAATGCGAAGACAGCCAAAGATAAAGCGCCTGTATCTCAGTTATCGAGCAATAGTCTTGATGACCTGGACGATACGCGCCAGCCAGTAACGCGTGCGGGGCATAGCGGCGCCAGCACTTGTGGCACCAAAGCCCAAGACCCGGACGAG…	MHSSSIHRNTGCIIQPPAPANTNAATDLQQKIEQPKQRSSHSLSSVGKRALKNVSKLFQKSKAPQQKAATPPTVKNVKPSQPTPNAKTAKDKAPVSQLSSNSLDDLDDTRQPVTRAGHSGASTCGTKAQDPDEPATLQSSRQSMMTRSNGGRFELKDEKLVRNSEPQGSIQLDAKGKPDFSTFNTPGLAPLLDSILATPRQTYLAHQSKDGVHGHQLLQANGHLLHLAQDDSSLALIRSSKEALHIEGKKPPAVKLEREDGNIHIDTASGRKTQELPGKAHIAHITGVLLRHDGERMRVHEDRLYQFDPLSARWKAPEGTEDIAFNSLATGGKGSVYAKSDDVVVDLTSPFMPHIEVKDLQSFSVAPDNRAALLSGKETQAILLTDMSPVIGDLTEKKT…	5145	1714
Psy0511_AvrE1a_1	Psy0511	AvrE	AvrE	AvrE	AvrE1	17	NA	88	GTGCATTCATCCTCGATCCACCGCAACACCGGATGCATCATTCAGCCGCCAGCCCCGGCAAACACGAACGCTGCAACTGATCTACAGCAAAAAATCGAACAACCCAAACAACGCTCCTCCCACTCACTGAGCAGTGTCGGCAAGCGAGCGCTGAAGAACGTCAGCAAACTGTTCCAGAAATCCAAGGCACCGCAGCAGAAAGCGGCCACGCCTCCCACCGTAAAAAACGTCAAGCCTTCACAGCCCACTCCAAATGCGAAGACAGCCAAAGATAAAGCGCCTGTATCTCAGTTATCGAGCAATAGTCTTGATGACCTGGACGATACGCGCCAGCCAGTAACGCGTGCGGGGCATAGCGGCGCCAGCACTTGTGGCACCAAAGCCCAAGACCCGGACGAG…	MHSSSIHRNTGCIIQPPAPANTNAATDLQQKIEQPKQRSSHSLSSVGKRALKNVSKLFQKSKAPQQKAATPPTVKNVKPSQPTPNAKTAKDKAPVSQLSSNSLDDLDDTRQPVTRAGHSGASTCGTKAQDPDEPATLQSSRQSMMTRSNGGRFELKDEKLVRNSEPQGSIQLDAKGKPDFSTFNTPGLAPLLDSILATPRQTYLAHQSKDGVHGHQLLQANGHLLHLAQDDSSLALIRSSKEALHIEGKKPPAVKLEREDGNIHIDTASGRKTQELPGKAHIAHITGVLLRHDGERMRVHEDRLYQFDPLSARWKAPEGTEDIAFNSLATGGKGSVYAKSDDVVVDLTSPFMPHIEVKDLQSFSVAPDNRAALLSGKETQAILLTDMSPVIGDLTEKKT…	5145	1714
Psy0512_AvrE1a_1	Psy0512	AvrE	AvrE	AvrE	AvrE1	17	NA	88	GTGCATTCATCCTCGATCCACCGCAACACCGGATGCATCATTCAGCCGCCAGCCCCGGCAAACACGAACGCTGCAACTGATCTACAGCAAAAAATCGAACAACCCAAACAACGCTCCTCCCACTCACTGAGCAGTGTCGGCAAGCGAGCGCTGAAGAACGTCAGCAAACTGTTCCAGAAATCCAAGGCACCGCAGCAGAAAGCGGCCACGCCTCCCACCGTAAAAAACGTCAAGCCTTCACAGCCCACTCCAAATGCGAAGACAGCCAAAGATAAAGCGCCTGTATCTCAGTTATCGAGCAATAGTCTTGATGACCTGGACGATACGCGCCAGCCAGTAACGCGTGCGGGGCATAGCGGCGCCAGCACTTGTGGCACCAAAGCCCAAGACCCGGACGAG…	MHSSSIHRNTGCIIQPPAPANTNAATDLQQKIEQPKQRSSHSLSSVGKRALKNVSKLFQKSKAPQQKAATPPTVKNVKPSQPTPNAKTAKDKAPVSQLSSNSLDDLDDTRQPVTRAGHSGASTCGTKAQDPDEPATLQSSRQSMMTRSNGGRFELKDEKLVRNSEPQGSIQLDAKGKPDFSTFNTPGLAPLLDSILATPRQTYLAHQSKDGVHGHQLLQANGHLLHLAQDDSSLALIRSSKEALHIEGKKPPAVKLEREDGNIHIDTASGRKTQELPGKAHIAHITGVLLRHDGERMRVHEDRLYQFDPLSARWKAPEGTEDIAFNSLATGGKGSVYAKSDDVVVDLTSPFMPHIEVKDLQSFSVAPDNRAALLSGKETQAILLTDMSPVIGDLTEKKT…	5145	1714
Psy0513_AvrE1a_1	Psy0513	AvrE	AvrE	AvrE	AvrE1	17	NA	88	GTGCATTCATCCTCGATCCACCGCAACACCGGATGCATCATTCAGCCGCCAGCCCCGGCAAACACGAACGCTGCAACTGATCTACAGCAAAAAATCGAACAACCCAAACAACGCTCCTCCCACTCACTGAGCAGTGTCGGCAAGCGAGCGCTGAAGAACGTCAGCAAACTGTTCCAGAAATCCAAGGCACCGCAGCAGAAAGCGGCCACGCCTCCCACCGTAAAAAACGTCAAGCCTTCACAGCCCACTCCAAATGCGAAGACAGCCAAAGATAAAGCGCCTGTATCTCAGTTATCGAGCAATAGTCTTGATGACCTGGACGATACGCGCCAGCCAGTAACGCGTGCGGGGCATAGCGGCGCCAGCACTTGTGGCACCAAAGCCCAAGACCCGGACGAG…	MHSSSIHRNTGCIIQPPAPANTNAATDLQQKIEQPKQRSSHSLSSVGKRALKNVSKLFQKSKAPQQKAATPPTVKNVKPSQPTPNAKTAKDKAPVSQLSSNSLDDLDDTRQPVTRAGHSGASTCGTKAQDPDEPATLQSSRQSMMTRSNGGRFELKDEKLVRNSEPQGSIQLDAKGKPDFSTFNTPGLAPLLDSILATPRQTYLAHQSKDGVHGHQLLQANGHLLHLAQDDSSLALIRSSKEALHIEGKKPPAVKLEREDGNIHIDTASGRKTQELPGKAHIAHITGVLLRHDGERMRVHEDRLYQFDPLSARWKAPEGTEDIAFNSLATGGKGSVYAKSDDVVVDLTSPFMPHIEVKDLQSFSVAPDNRAALLSGKETQAILLTDMSPVIGDLTEKKT…	5145	1714
Psy0514_AvrE1a_1	Psy0514	AvrE	AvrE	AvrE	AvrE1	17	NA	88	GTGCATTCATCCTCGATCCACCGCAACACCGGATGCATCATTCAGCCGCCAGCCCCGGCAAACACGAACGCTGCAACTGATCTACAGCAAAAAATCGAACAACCCAAACAACGCTCCTCCCACTCACTGAGCAGTGTCGGCAAGCGAGCGCTGAAGAACGTCAGCAAACTGTTCCAGAAATCCAAGGCACCGCAGCAGAAAGCGGCCACGCCTCCCACCGTAAAAAACGTCAAGCCTTCACAGCCCACTCCAAATGCGAAGACAGCCAAAGATAAAGCGCCTGTATCTCAGTTATCGAGCAATAGTCTTGATGACCTGGACGATACGCGCCAGCCAGTAACGCGTGCGGGGCATAGCGGCGCCAGCACTTGTGGCACCAAAGCCCAAGACCCGGACGAG…	MHSSSIHRNTGCIIQPPAPANTNAATDLQQKIEQPKQRSSHSLSSVGKRALKNVSKLFQKSKAPQQKAATPPTVKNVKPSQPTPNAKTAKDKAPVSQLSSNSLDDLDDTRQPVTRAGHSGASTCGTKAQDPDEPATLQSSRQSMMTRSNGGRFELKDEKLVRNSEPQGSIQLDAKGKPDFSTFNTPGLAPLLDSILATPRQTYLAHQSKDGVHGHQLLQANGHLLHLAQDDSSLALIRSSKEALHIEGKKPPAVKLEREDGNIHIDTASGRKTQELPGKAHIAHITGVLLRHDGERMRVHEDRLYQFDPLSARWKAPEGTEDIAFNSLATGGKGSVYAKSDDVVVDLTSPFMPHIEVKDLQSFSVAPDNRAALLSGKETQAILLTDMSPVIGDLTEKKT…	5145	1714
Psy0515_AvrE1a_1	Psy0515	AvrE	AvrE	AvrE	AvrE1	17	NA	88	GTGCATTCATCCTCGATCCACCGCAACACCGGATGCATCATTCAGCCGCCAGCCCCGGCAAACACGAACGCTGCAACTGATCTACAGCAAAAAATCGAACAACCCAAACAACGCTCCTCCCACTCACTGAGCAGTGTCGGCAAGCGAGCGCTGAAGAACGTCAGCAAACTGTTCCAGAAATCCAAGGCACCGCAGCAGAAAGCGGCCACGCCTCCCACCGTAAAAAACGTCAAGCCTTCACAGCCCACTCCAAATGCGAAGACAGCCAAAGATAAAGCGCCTGTATCTCAGTTATCGAGCAATAGTCTTGATGACCTGGACGATACGCGCCAGCCAGTAACGCGTGCGGGGCATAGCGGCGCCAGCACTTGTGGCACCAAAGCCCAAGACCCGGACGAG…	MHSSSIHRNTGCIIQPPAPANTNAATDLQQKIEQPKQRSSHSLSSVGKRALKNVSKLFQKSKAPQQKAATPPTVKNVKPSQPTPNAKTAKDKAPVSQLSSNSLDDLDDTRQPVTRAGHSGASTCGTKAQDPDEPATLQSSRQSMMTRSNGGRFELKDEKLVRNSEPQGSIQLDAKGKPDFSTFNTPGLAPLLDSILATPRQTYLAHQSKDGVHGHQLLQANGHLLHLAQDDSSLALIRSSKEALHIEGKKPPAVKLEREDGNIHIDTASGRKTQELPGKAHIAHITGVLLRHDGERMRVHEDRLYQFDPLSARWKAPEGTEDIAFNSLATGGKGSVYAKSDDVVVDLTSPFMPHIEVKDLQSFSVAPDNRAALLSGKETQAILLTDMSPVIGDLTEKKT…	5145	1714
Psy0516_AvrE1a_1	Psy0516	AvrE	AvrE	AvrE	AvrE1	17	NA	88	GTGCATTCATCCTCGATCCACCGCAACACCGGATGCATCATTCAGCCGCCAGCCCCGGCAAACACGAACGCTGCAACTGATCTACAGCAAAAAATCGAACAACCCAAACAACGCTCCTCCCACTCACTGAGCAGTGTCGGCAAGCGAGCGCTGAAGAACGTCAGCAAACTGTTCCAGAAATCCAAGGCACCGCAGCAGAAAGCGGCCACGCCTCCCACCGTAAAAAACGTCAAGCCTTCACAGCCCACTCCAAATGCGAAGACAGCCAAAGATAAAGCGCCTGTATCTCAGTTATCGAGCAATAGTCTTGATGACCTGGACGATACGCGCCAGCCAGTAACGCGTGCGGGGCATAGCGGCGCCAGCACTTGTGGCACCAAAGCCCAAGACCCGGACGAG…	MHSSSIHRNTGCIIQPPAPANTNAATDLQQKIEQPKQRSSHSLSSVGKRALKNVSKLFQKSKAPQQKAATPPTVKNVKPSQPTPNAKTAKDKAPVSQLSSNSLDDLDDTRQPVTRAGHSGASTCGTKAQDPDEPATLQSSRQSMMTRSNGGRFELKDEKLVRNSEPQGSIQLDAKGKPDFSTFNTPGLAPLLDSILATPRQTYLAHQSKDGVHGHQLLQANGHLLHLAQDDSSLALIRSSKEALHIEGKKPPAVKLEREDGNIHIDTASGRKTQELPGKAHIAHITGVLLRHDGERMRVHEDRLYQFDPLSARWKAPEGTEDIAFNSLATGGKGSVYAKSDDVVVDLTSPFMPHIEVKDLQSFSVAPDNRAALLSGKETQAILLTDMSPVIGDLTEKKT…	5145	1714
Psy0517_AvrE1a_1	Psy0517	AvrE	AvrE	AvrE	AvrE1	17	NA	88	GTGCATTCATCCTCGATCCACCGCAACACCGGATGCATCATTCAGCCGCCAGCCCCGGCAAACACGAACGCTGCAACTGATCTACAGCAAAAAATCGAACAACCCAAACAACGCTCCTCCCACTCACTGAGCAGTGTCGGCAAGCGAGCGCTGAAGAACGTCAGCAAACTGTTCCAGAAATCCAAGGCACCGCAGCAGAAAGCGGCCACGCCTCCCACCGTAAAAAACGTCAAGCCTTCACAGCCCACTCCAAATGCGAAGACAGCCAAAGATAAAGCGCCTGTATCTCAGTTATCGAGCAATAGTCTTGATGACCTGGACGATACGCGCCAGCCAGTAACGCGTGCGGGGCATAGCGGCGCCAGCACTTGTGGCACCAAAGCCCAAGACCCGGACGAG…	MHSSSIHRNTGCIIQPPAPANTNAATDLQQKIEQPKQRSSHSLSSVGKRALKNVSKLFQKSKAPQQKAATPPTVKNVKPSQPTPNAKTAKDKAPVSQLSSNSLDDLDDTRQPVTRAGHSGASTCGTKAQDPDEPATLQSSRQSMMTRSNGGRFELKDEKLVRNSEPQGSIQLDAKGKPDFSTFNTPGLAPLLDSILATPRQTYLAHQSKDGVHGHQLLQANGHLLHLAQDDSSLALIRSSKEALHIEGKKPPAVKLEREDGNIHIDTASGRKTQELPGKAHIAHITGVLLRHDGERMRVHEDRLYQFDPLSARWKAPEGTEDIAFNSLATGGKGSVYAKSDDVVVDLTSPFMPHIEVKDLQSFSVAPDNRAALLSGKETQAILLTDMSPVIGDLTEKKT…	5145	1714
Psy0519_AvrE1a_1	Psy0519	AvrE	AvrE	AvrE	AvrE1	17	NA	88	GTGCATTCATCCTCGATCCACCGCAACACCGGATGCATCATTCAGCCGCCAGCCCCGGCAAACACGAACGCTGCAACTGATCTACAGCAAAAAATCGAACAACCCAAACAACGCTCCTCCCACTCACTGAGCAGTGTCGGCAAGCGAGCGCTGAAGAACGTCAGCAAACTGTTCCAGAAATCCAAGGCACCGCAGCAGAAAGCGGCCACGCCTCCCACCGTAAAAAACGTCAAGCCTTCACAGCCCACTCCAAATGCGAAGACAGCCAAAGATAAAGCGCCTGTATCTCAGTTATCGAGCAATAGTCTTGATGACCTGGACGATACGCGCCAGCCAGTAACGCGTGCGGGGCATAGCGGCGCCAGCACTTGTGGCACCAAAGCCCAAGACCCGGACGAG…	MHSSSIHRNTGCIIQPPAPANTNAATDLQQKIEQPKQRSSHSLSSVGKRALKNVSKLFQKSKAPQQKAATPPTVKNVKPSQPTPNAKTAKDKAPVSQLSSNSLDDLDDTRQPVTRAGHSGASTCGTKAQDPDEPATLQSSRQSMMTRSNGGRFELKDEKLVRNSEPQGSIQLDAKGKPDFSTFNTPGLAPLLDSILATPRQTYLAHQSKDGVHGHQLLQANGHLLHLAQDDSSLALIRSSKEALHIEGKKPPAVKLEREDGNIHIDTASGRKTQELPGKAHIAHITGVLLRHDGERMRVHEDRLYQFDPLSARWKAPEGTEDIAFNSLATGGKGSVYAKSDDVVVDLTSPFMPHIEVKDLQSFSVAPDNRAALLSGKETQAILLTDMSPVIGDLTEKKT…	5145	1714
Psy0520_AvrE1a_1	Psy0520	AvrE	AvrE	AvrE	AvrE1	17	NA	88	GTGCATTCATCCTCGATCCACCGCAACACCGGATGCATCATTCAGCCGCCAGCCCCGGCAAACACGAACGCTGCAACTGATCTACAGCAAAAAATCGAACAACCCAAACAACGCTCCTCCCACTCACTGAGCAGTGTCGGCAAGCGAGCGCTGAAGAACGTCAGCAAACTGTTCCAGAAATCCAAGGCACCGCAGCAGAAAGCGGCCACGCCTCCCACCGTAAAAAACGTCAAGCCTTCACAGCCCACTCCAAATGCGAAGACAGCCAAAGATAAAGCGCCTGTATCTCAGTTATCGAGCAATAGTCTTGATGACCTGGACGATACGCGCCAGCCAGTAACGCGTGCGGGGCATAGCGGCGCCAGCACTTGTGGCACCAAAGCCCAAGACCCGGACGAG…	MHSSSIHRNTGCIIQPPAPANTNAATDLQQKIEQPKQRSSHSLSSVGKRALKNVSKLFQKSKAPQQKAATPPTVKNVKPSQPTPNAKTAKDKAPVSQLSSNSLDDLDDTRQPVTRAGHSGASTCGTKAQDPDEPATLQSSRQSMMTRSNGGRFELKDEKLVRNSEPQGSIQLDAKGKPDFSTFNTPGLAPLLDSILATPRQTYLAHQSKDGVHGHQLLQANGHLLHLAQDDSSLALIRSSKEALHIEGKKPPAVKLEREDGNIHIDTASGRKTQELPGKAHIAHITGVLLRHDGERMRVHEDRLYQFDPLSARWKAPEGTEDIAFNSLATGGKGSVYAKSDDVVVDLTSPFMPHIEVKDLQSFSVAPDNRAALLSGKETQAILLTDMSPVIGDLTEKKT…	5145	1714
Psy0522_AvrE1a_1	Psy0522	AvrE	AvrE	AvrE	AvrE1	17	NA	88	GTGCATTCATCCTCGATCCACCGCAACACCGGATGCATCATTCAGCCGCCAGCCCCGGCAAACACGAACGCTGCAACTGATCTACAGCAAAAAATCGAACAACCCAAACAACGCTCCTCCCACTCACTGAGCAGTGTCGGCAAGCGAGCGCTGAAGAACGTCAGCAAACTGTTCCAGAAATCCAAGGCACCGCAGCAGAAAGCGGCCACGCCTCCCACCGTAAAAAACGTCAAGCCTTCACAGCCCACTCCAAATGCGAAGACAGCCAAAGATAAAGCGCCTGTATCTCAGTTATCGAGCAATAGTCTTGATGACCTGGACGATACGCGCCAGCCAGTAACGCGTGCGGGGCATAGCGGCGCCAGCACTTGTGGCACCAAAGCCCAAGACCCGGACGAG…	MHSSSIHRNTGCIIQPPAPANTNAATDLQQKIEQPKQRSSHSLSSVGKRALKNVSKLFQKSKAPQQKAATPPTVKNVKPSQPTPNAKTAKDKAPVSQLSSNSLDDLDDTRQPVTRAGHSGASTCGTKAQDPDEPATLQSSRQSMMTRSNGGRFELKDEKLVRNSEPQGSIQLDAKGKPDFSTFNTPGLAPLLDSILATPRQTYLAHQSKDGVHGHQLLQANGHLLHLAQDDSSLALIRSSKEALHIEGKKPPAVKLEREDGNIHIDTASGRKTQELPGKAHIAHITGVLLRHDGERMRVHEDRLYQFDPLSARWKAPEGTEDIAFNSLATGGKGSVYAKSDDVVVDLTSPFMPHIEVKDLQSFSVAPDNRAALLSGKETQAILLTDMSPVIGDLTEKKT…	5145	1714
Psy0523_AvrE1a_1	Psy0523	AvrE	AvrE	AvrE	AvrE1	17	NA	88	GTGCATTCATCCTCGATCCACCGCAACACCGGATGCATCATTCAGCCGCCAGCCCCGGCAAACACGAACGCTGCAACTGATCTACAGCAAAAAATCGAACAACCCAAACAACGCTCCTCCCACTCACTGAGCAGTGTCGGCAAGCGAGCGCTGAAGAACGTCAGCAAACTGTTCCAGAAATCCAAGGCACCGCAGCAGAAAGCGGCCACGCCTCCCACCGTAAAAAACGTCAAGCCTTCACAGCCCACTCCAAATGCGAAGACAGCCAAAGATAAAGCGCCTGTATCTCAGTTATCGAGCAATAGTCTTGATGACCTGGACGATACGCGCCAGCCAGTAACGCGTGCGGGGCATAGCGGCGCCAGCACTTGTGGCACCAAAGCCCAAGACCCGGACGAG…	MHSSSIHRNTGCIIQPPAPANTNAATDLQQKIEQPKQRSSHSLSSVGKRALKNVSKLFQKSKAPQQKAATPPTVKNVKPSQPTPNAKTAKDKAPVSQLSSNSLDDLDDTRQPVTRAGHSGASTCGTKAQDPDEPATLQSSRQSMMTRSNGGRFELKDEKLVRNSEPQGSIQLDAKGKPDFSTFNTPGLAPLLDSILATPRQTYLAHQSKDGVHGHQLLQANGHLLHLAQDDSSLALIRSSKEALHIEGKKPPAVKLEREDGNIHIDTASGRKTQELPGKAHIAHITGVLLRHDGERMRVHEDRLYQFDPLSARWKAPEGTEDIAFNSLATGGKGSVYAKSDDVVVDLTSPFMPHIEVKDLQSFSVAPDNRAALLSGKETQAILLTDMSPVIGDLTEKKT…	5145	1714
Psy0524_AvrE1a_1	Psy0524	AvrE	AvrE	AvrE	AvrE1	17	NA	88	GTGCATTCATCCTCGATCCACCGCAACACCGGATGCATCATTCAGCCGCCAGCCCCGGCAAACACGAACGCTGCAACTGATCTACAGCAAAAAATCGAACAACCCAAACAACGCTCCTCCCACTCACTGAGCAGTGTCGGCAAGCGAGCGCTGAAGAACGTCAGCAAACTGTTCCAGAAATCCAAGGCACCGCAGCAGAAAGCGGCCACGCCTCCCACCGTAAAAAACGTCAAGCCTTCACAGCCCACTCCAAATGCGAAGACAGCCAAAGATAAAGCGCCTGTATCTCAGTTATCGAGCAATAGTCTTGATGACCTGGACGATACGCGCCAGCCAGTAACGCGTGCGGGGCATAGCGGCGCCAGCACTTGTGGCACCAAAGCCCAAGACCCGGACGAG…	MHSSSIHRNTGCIIQPPAPANTNAATDLQQKIEQPKQRSSHSLSSVGKRALKNVSKLFQKSKAPQQKAATPPTVKNVKPSQPTPNAKTAKDKAPVSQLSSNSLDDLDDTRQPVTRAGHSGASTCGTKAQDPDEPATLQSSRQSMMTRSNGGRFELKDEKLVRNSEPQGSIQLDAKGKPDFSTFNTPGLAPLLDSILATPRQTYLAHQSKDGVHGHQLLQANGHLLHLAQDDSSLALIRSSKEALHIEGKKPPAVKLEREDGNIHIDTASGRKTQELPGKAHIAHITGVLLRHDGERMRVHEDRLYQFDPLSARWKAPEGTEDIAFNSLATGGKGSVYAKSDDVVVDLTSPFMPHIEVKDLQSFSVAPDNRAALLSGKETQAILLTDMSPVIGDLTEKKT…	5145	1714
Psy0525_AvrE1a_1	Psy0525	AvrE	AvrE	AvrE	AvrE1	17	NA	88	GTGCATTCATCCTCGATCCACCGCAACACCGGATGCATCATTCAGCCGCCAGCCCCGGCAAACACGAACGCTGCAACTGATCTACAGCAAAAAATCGAACAACCCAAACAACGCTCCTCCCACTCACTGAGCAGTGTCGGCAAGCGAGCGCTGAAGAACGTCAGCAAACTGTTCCAGAAATCCAAGGCACCGCAGCAGAAAGCGGCCACGCCTCCCACCGTAAAAAACGTCAAGCCTTCACAGCCCACTCCAAATGCGAAGACAGCCAAAGATAAAGCGCCTGTATCTCAGTTATCGAGCAATAGTCTTGATGACCTGGACGATACGCGCCAGCCAGTAACGCGTGCGGGGCATAGCGGCGCCAGCACTTGTGGCACCAAAGCCCAAGACCCGGACGAG…	MHSSSIHRNTGCIIQPPAPANTNAATDLQQKIEQPKQRSSHSLSSVGKRALKNVSKLFQKSKAPQQKAATPPTVKNVKPSQPTPNAKTAKDKAPVSQLSSNSLDDLDDTRQPVTRAGHSGASTCGTKAQDPDEPATLQSSRQSMMTRSNGGRFELKDEKLVRNSEPQGSIQLDAKGKPDFSTFNTPGLAPLLDSILATPRQTYLAHQSKDGVHGHQLLQANGHLLHLAQDDSSLALIRSSKEALHIEGKKPPAVKLEREDGNIHIDTASGRKTQELPGKAHIAHITGVLLRHDGERMRVHEDRLYQFDPLSARWKAPEGTEDIAFNSLATGGKGSVYAKSDDVVVDLTSPFMPHIEVKDLQSFSVAPDNRAALLSGKETQAILLTDMSPVIGDLTEKKT…	5145	1714
Psy0526_AvrE1a_1	Psy0526	AvrE	AvrE	AvrE	AvrE1	17	NA	88	GTGCATTCATCCTCGATCCACCGCAACACCGGATGCATCATTCAGCCGCCAGCCCCGGCAAACACGAACGCTGCAACTGATCTACAGCAAAAAATCGAACAACCCAAACAACGCTCCTCCCACTCACTGAGCAGTGTCGGCAAGCGAGCGCTGAAGAACGTCAGCAAACTGTTCCAGAAATCCAAGGCACCGCAGCAGAAAGCGGCCACGCCTCCCACCGTAAAAAACGTCAAGCCTTCACAGCCCACTCCAAATGCGAAGACAGCCAAAGATAAAGCGCCTGTATCTCAGTTATCGAGCAATAGTCTTGATGACCTGGACGATACGCGCCAGCCAGTAACGCGTGCGGGGCATAGCGGCGCCAGCACTTGTGGCACCAAAGCCCAAGACCCGGACGAG…	MHSSSIHRNTGCIIQPPAPANTNAATDLQQKIEQPKQRSSHSLSSVGKRALKNVSKLFQKSKAPQQKAATPPTVKNVKPSQPTPNAKTAKDKAPVSQLSSNSLDDLDDTRQPVTRAGHSGASTCGTKAQDPDEPATLQSSRQSMMTRSNGGRFELKDEKLVRNSEPQGSIQLDAKGKPDFSTFNTPGLAPLLDSILATPRQTYLAHQSKDGVHGHQLLQANGHLLHLAQDDSSLALIRSSKEALHIEGKKPPAVKLEREDGNIHIDTASGRKTQELPGKAHIAHITGVLLRHDGERMRVHEDRLYQFDPLSARWKAPEGTEDIAFNSLATGGKGSVYAKSDDVVVDLTSPFMPHIEVKDLQSFSVAPDNRAALLSGKETQAILLTDMSPVIGDLTEKKT…	5145	1714
Psy0527_AvrE1a_1	Psy0527	AvrE	AvrE	AvrE	AvrE1	17	NA	88	GTGCATTCATCCTCGATCCACCGCAACACCGGATGCATCATTCAGCCGCCAGCCCCGGCAAACACGAACGCTGCAACTGATCTACAGCAAAAAATCGAACAACCCAAACAACGCTCCTCCCACTCACTGAGCAGTGTCGGCAAGCGAGCGCTGAAGAACGTCAGCAAACTGTTCCAGAAATCCAAGGCACCGCAGCAGAAAGCGGCCACGCCTCCCACCGTAAAAAACGTCAAGCCTTCACAGCCCACTCCAAATGCGAAGACAGCCAAAGATAAAGCGCCTGTATCTCAGTTATCGAGCAATAGTCTTGATGACCTGGACGATACGCGCCAGCCAGTAACGCGTGCGGGGCATAGCGGCGCCAGCACTTGTGGCACCAAAGCCCAAGACCCGGACGAG…	MHSSSIHRNTGCIIQPPAPANTNAATDLQQKIEQPKQRSSHSLSSVGKRALKNVSKLFQKSKAPQQKAATPPTVKNVKPSQPTPNAKTAKDKAPVSQLSSNSLDDLDDTRQPVTRAGHSGASTCGTKAQDPDEPATLQSSRQSMMTRSNGGRFELKDEKLVRNSEPQGSIQLDAKGKPDFSTFNTPGLAPLLDSILATPRQTYLAHQSKDGVHGHQLLQANGHLLHLAQDDSSLALIRSSKEALHIEGKKPPAVKLEREDGNIHIDTASGRKTQELPGKAHIAHITGVLLRHDGERMRVHEDRLYQFDPLSARWKAPEGTEDIAFNSLATGGKGSVYAKSDDVVVDLTSPFMPHIEVKDLQSFSVAPDNRAALLSGKETQAILLTDMSPVIGDLTEKKT…	5145	1714
Psy0528_AvrE1a_1	Psy0528	AvrE	AvrE	AvrE	AvrE1	17	NA	88	GTGCATTCATCCTCGATCCACCGCAACACCGGATGCATCATTCAGCCGCCAGCCCCGGCAAACACGAACGCTGCAACTGATCTACAGCAAAAAATCGAACAACCCAAACAACGCTCCTCCCACTCACTGAGCAGTGTCGGCAAGCGAGCGCTGAAGAACGTCAGCAAACTGTTCCAGAAATCCAAGGCACCGCAGCAGAAAGCGGCCACGCCTCCCACCGTAAAAAACGTCAAGCCTTCACAGCCCACTCCAAATGCGAAGACAGCCAAAGATAAAGCGCCTGTATCTCAGTTATCGAGCAATAGTCTTGATGACCTGGACGATACGCGCCAGCCAGTAACGCGTGCGGGGCATAGCGGCGCCAGCACTTGTGGCACCAAAGCCCAAGACCCGGACGAG…	MHSSSIHRNTGCIIQPPAPANTNAATDLQQKIEQPKQRSSHSLSSVGKRALKNVSKLFQKSKAPQQKAATPPTVKNVKPSQPTPNAKTAKDKAPVSQLSSNSLDDLDDTRQPVTRAGHSGASTCGTKAQDPDEPATLQSSRQSMMTRSNGGRFELKDEKLVRNSEPQGSIQLDAKGKPDFSTFNTPGLAPLLDSILATPRQTYLAHQSKDGVHGHQLLQANGHLLHLAQDDSSLALIRSSKEALHIEGKKPPAVKLEREDGNIHIDTASGRKTQELPGKAHIAHITGVLLRHDGERMRVHEDRLYQFDPLSARWKAPEGTEDIAFNSLATGGKGSVYAKSDDVVVDLTSPFMPHIEVKDLQSFSVAPDNRAALLSGKETQAILLTDMSPVIGDLTEKKT…	5145	1714
Psy0530_AvrE1a_1	Psy0530	AvrE	AvrE	AvrE	AvrE1	17	NA	88	GTGCATTCATCCTCGATCCACCGCAACACCGGATGCATCATTCAGCCGCCAGCCCCGGCAAACACGAACGCTGCAACTGATCTACAGCAAAAAATCGAACAACCCAAACAACGCTCCTCCCACTCACTGAGCAGTGTCGGCAAGCGAGCGCTGAAGAACGTCAGCAAACTGTTCCAGAAATCCAAGGCACCGCAGCAGAAAGCGGCCACGCCTCCCACCGTAAAAAACGTCAAGCCTTCACAGCCCACTCCAAATGCGAAGACAGCCAAAGATAAAGCGCCTGTATCTCAGTTATCGAGCAATAGTCTTGATGACCTGGACGATACGCGCCAGCCAGTAACGCGTGCGGGGCATAGCGGCGCCAGCACTTGTGGCACCAAAGCCCAAGACCCGGACGAG…	MHSSSIHRNTGCIIQPPAPANTNAATDLQQKIEQPKQRSSHSLSSVGKRALKNVSKLFQKSKAPQQKAATPPTVKNVKPSQPTPNAKTAKDKAPVSQLSSNSLDDLDDTRQPVTRAGHSGASTCGTKAQDPDEPATLQSSRQSMMTRSNGGRFELKDEKLVRNSEPQGSIQLDAKGKPDFSTFNTPGLAPLLDSILATPRQTYLAHQSKDGVHGHQLLQANGHLLHLAQDDSSLALIRSSKEALHIEGKKPPAVKLEREDGNIHIDTASGRKTQELPGKAHIAHITGVLLRHDGERMRVHEDRLYQFDPLSARWKAPEGTEDIAFNSLATGGKGSVYAKSDDVVVDLTSPFMPHIEVKDLQSFSVAPDNRAALLSGKETQAILLTDMSPVIGDLTEKKT…	5145	1714
Psy0535_AvrE1a_1	Psy0535	AvrE	AvrE	AvrE	AvrE1	17	NA	88	GTGCATTCATCCTCGATCCACCGCAACACCGGATGCATCATTCAGCCGCCAGCCCCGGCAAACACGAACGCTGCAACTGATCTACAGCAAAAAATCGAACAACCCAAACAACGCTCCTCCCACTCACTGAGCAGTGTCGGCAAGCGAGCGCTGAAGAACGTCAGCAAACTGTTCCAGAAATCCAAGGCACCGCAGCAGAAAGCGGCCACGCCTCCCACCGTAAAAAACGTCAAGCCTTCACAGCCCACTCCAAATGCGAAGACAGCCAAAGATAAAGCGCCTGTATCTCAGTTATCGAGCAATAGTCTTGATGACCTGGACGATACGCGCCAGCCAGTAACGCGTGCGGGGCATAGCGGCGCCAGCACTTGTGGCACCAAAGCCCAAGACCCGGACGAG…	MHSSSIHRNTGCIIQPPAPANTNAATDLQQKIEQPKQRSSHSLSSVGKRALKNVSKLFQKSKAPQQKAATPPTVKNVKPSQPTPNAKTAKDKAPVSQLSSNSLDDLDDTRQPVTRAGHSGASTCGTKAQDPDEPATLQSSRQSMMTRSNGGRFELKDEKLVRNSEPQGSIQLDAKGKPDFSTFNTPGLAPLLDSILATPRQTYLAHQSKDGVHGHQLLQANGHLLHLAQDDSSLALIRSSKEALHIEGKKPPAVKLEREDGNIHIDTASGRKTQELPGKAHIAHITGVLLRHDGERMRVHEDRLYQFDPLSARWKAPEGTEDIAFNSLATGGKGSVYAKSDDVVVDLTSPFMPHIEVKDLQSFSVAPDNRAALLSGKETQAILLTDMSPVIGDLTEKKT…	5145	1714
PsyICMP4909_AvrE1a_1	PsyICMP4909	AvrE	AvrE	AvrE	AvrE1	17	NA	88	GTGCATTCATCCTCGATCCACCGCAACACCGGATGCATCATTCAGCCGCCAGCCCCGGCAAACACGAACGCTGCAACTGATCTACAGCAAAAAATCGAACAACCCAAACAACGCTCCTCCCACTCACTGAGCAGTGTCGGCAAGCGAGCGCTGAAGAACGTCAGCAAACTGTTCCAGAAATCCAAGGCACCGCAGCAGAAAGCGGCCACGCCTCCCACCGTAAAAAACGTCAAGCCTTCACAGCCCACTCCAAATGCGAAGACAGCCAAAGATAAAGCGCCTGTATCTCAGTTATCGAGCAATAGTCTTGATGACCTGGACGATACGCGCCAGCCAGTAACGCGTGCGGGGCATAGCGGCGCCAGCACTTGTGGCACCAAAGCCCAAGACCCGGACGAG…	MHSSSIHRNTGCIIQPPAPANTNAATDLQQKIEQPKQRSSHSLSSVGKRALKNVSKLFQKSKAPQQKAATPPTVKNVKPSQPTPNAKTAKDKAPVSQLSSNSLDDLDDTRQPVTRAGHSGASTCGTKAQDPDEPATLQSSRQSMMTRSNGGRFELKDEKLVRNSEPQGSIQLDAKGKPDFSTFNTPGLAPLLDSILATPRQTYLAHQSKDGVHGHQLLQANGHLLHLAQDDSSLALIRSSKEALHIEGKKPPAVKLEREDGNIHIDTASGRKTQELPGKAHIAHITGVLLRHDGERMRVHEDRLYQFDPLSARWKAPEGTEDIAFNSLATGGKGSVYAKSDDVVVDLTSPFMPHIEVKDLQSFSVAPDNRAALLSGKETQAILLTDMSPVIGDLTEKKT…	5145	1714
Pae0893_23_AvrE1a_1	Pae0893_23	AvrE	AvrE	AvrE	AvrE1	17	NA	89	GTGCATTCATCATCGATCCACCGCAACACCGGGAGCATCATTCAGCCGCCAGTCCCGGCAAACACGAACGCTGCAACGGATCTACAGCAAAAAATCGAACAACCCAAACAACGCTCCTCGCACTCACTGAGCAGTGTCGGCAAGCGAGCGCTGAAGAACGTCAGCAAACTGTTCCAGAAATCCAAGGCACCGCAGCAGAAAGCGGCCACGCCTCCCACCGTAAAAAACGTCAAGCCTTCACAGCCCACTTCAAATTCGAAGACAGCCAAAGACAAAGCGCCTGTATCTCAGTTATCGAGCAATAGTCTTGATGACCTGGACGATACGCGCCAGCCAGTGACGCGTGCGGGGCATAGCGGCGCCAGCACTCCCGGCACCAAAGCCCAAGACCCGGACGAG…	MHSSSIHRNTGSIIQPPVPANTNAATDLQQKIEQPKQRSSHSLSSVGKRALKNVSKLFQKSKAPQQKAATPPTVKNVKPSQPTSNSKTAKDKAPVSQLSSNSLDDLDDTRQPVTRAGHSGASTPGTKAQDPDEPATLQSSRQSMMTRSNGGRFELKDEKLVRNSEPQGSIQLDAKGKPDFSTFNTPGLAPLLDSILATPMQTYLAHQSKDGVHGHQLLQANGHLLHLAQDDSSLALIRSSKEALHIEGKKPPAVKLEREDGNIHIDTASGRKTQELPGKAHIAHITGVLLRHDGERMRVHEDRLYQFDPLSARWKAPEGTEDIAFNNLATGGNGSVYAKSDDVVVDLTSPFMPHIEVKDLQSFSVAPDNRAALLSGKETQAILLTDMSPVIGDLTEKKT…	5145	1714
Pae3681_AvrE1a_1	Pae3681	AvrE	AvrE	AvrE	AvrE1	17	NA	89	GTGCATTCATCATCGATCCACCGCAACACCGGGAGCATCATTCAGCCGCCAGTCCCGGCAAACACGAACGCTGCAACGGATCTACAGCAAAAAATCGAACAACCCAAACAACGCTCCTCGCACTCACTGAGCAGTGTCGGCAAGCGAGCGCTGAAGAACGTCAGCAAACTGTTCCAGAAATCCAAGGCACCGCAGCAGAAAGCGGCCACGCCTCCCACCGTAAAAAACGTCAAGCCTTCACAGCCCACTTCAAATTCGAAGACAGCCAAAGACAAAGCGCCTGTATCTCAGTTATCGAGCAATAGTCTTGATGACCTGGACGATACGCGCCAGCCAGTGACGCGTGCGGGGCATAGCGGCGCCAGCACTCCCGGCACCAAAGCCCAAGACCCGGACGAG…	MHSSSIHRNTGSIIQPPVPANTNAATDLQQKIEQPKQRSSHSLSSVGKRALKNVSKLFQKSKAPQQKAATPPTVKNVKPSQPTSNSKTAKDKAPVSQLSSNSLDDLDDTRQPVTRAGHSGASTPGTKAQDPDEPATLQSSRQSMMTRSNGGRFELKDEKLVRNSEPQGSIQLDAKGKPDFSTFNTPGLAPLLDSILATPMQTYLAHQSKDGVHGHQLLQANGHLLHLAQDDSSLALIRSSKEALHIEGKKPPAVKLEREDGNIHIDTASGRKTQELPGKAHIAHITGVLLRHDGERMRVHEDRLYQFDPLSARWKAPEGTEDIAFNNLATGGNGSVYAKSDDVVVDLTSPFMPHIEVKDLQSFSVAPDNRAALLSGKETQAILLTDMSPVIGDLTEKKT…	5145	1714
Pae2250_AvrE1a_1	Pae2250	AvrE	AvrE	AvrE	AvrE1	17	NA	90	GTGCATTCATCATCGATCCACCGCAACACCGGGAGCATCATTCAGCCGCCAGTCCCGGCAAACACGAACGCTGCAACGGATCTACAGCAAAAAATCGAACAACCCAAACAACGCTCCTCGCACTCACTGAGCAGTGTCGGCAAGCGAGCGCTGAAGAACGTCAGCAAACTGTTCCAGAAATCCAAGGCACCGCAGCAGAAAGCGGCCACGCCTCCCACCGTAAAAAACGTCAAGCCTTCACAGCCCACTTCAAATTCGAAGACAGCCAAAGACAAAGCGCCTGTATCTCAGTTATCGAGCAATAGTCTTGATGACCTGGACGATACGCGCCAGCCAGTGACGCGTGCGGGGCATAGCGGCGCCAGCACTCCCGGCACCAAAGCCCAAGACCCGGACGAG…	MHSSSIHRNTGSIIQPPVPANTNAATDLQQKIEQPKQRSSHSLSSVGKRALKNVSKLFQKSKAPQQKAATPPTVKNVKPSQPTSNSKTAKDKAPVSQLSSNSLDDLDDTRQPVTRAGHSGASTPGTKAQDPDEPATLQSSRQSMMTRSNGGRFELKDEKLVRNSEPQGSIQLDAKGKPDFSTFNTPGLAPLLDSILATPMQTYLAHQSKDGVHGHQLLQANGHLLHLAQDDSSLALIRSSKEALHIEGKKPPAVKLEREDGNIHIDTASGRKTQELPGKAHIAHITGVLLRHDGERMRVHEDRLYQFDPLSARWKAPEGTEDIAFNNLATGGNGSVYAKSDDVVVDLTSPFMPHIEVKDLQSFSVAPDNRAALLSGKETQAILLTDMSPVIGDLTEKKT…	5145	1714
PaeICMP8947_AvrE1a_1	PaeICMP8947	AvrE	AvrE	AvrE	AvrE1	17	NA	91	ATGCCGCACATCGAAGTCAAGGATCTGCAGTCATTTTCGGTGGCACCGGACAACAGAGCGGCATTGCTCAGCGGCAAGGAGACTCAGGCGATCCTGCTCACAGACATGAGCCCGGTGATTGGCGATCTGACCGAGAAGAAAACAAAAGCGCTCGAACTCGACGGCGGCAAGGCGCAAGCGGCTGCGGTCGGCCTGAGCGACAACAAGCTGTTCATAGCAGACACCCAAGGCAGACTTTACAGCGCGGACCGTAGTGCATTTGAAAGCAATGACCCGCAATTGAAGCTGACGCCCGATCAGGCAAACTTTCAACTGGCAGGCCTGCCGCTGGGTGGCCACGACAGCGTCACCGGATTCATCAACGGGGATGACGGCCGTGTGCATGCATTGATCAAAAAC…	MPHIEVKDLQSFSVAPDNRAALLSGKETQAILLTDMSPVIGDLTEKKTKALELDGGKAQAAAVGLSDNKLFIADTQGRLYSADRSAFESNDPQLKLTPDQANFQLAGLPLGGHDSVTGFINGDDGRVHALIKNRQGEIHSHALNEQDSKLESGWNLTNALVLSNNRGLTMPPAPTAADRLNLDRAGLVGLSEGRIQRWDATPECWKDAGIKDIDRLQRGADSNAYVLKGGKLHALKVTPEHPNMAFDHNTALAQTARSTTVEMGKEIEGLDDRVITAFAMVSNKSFVALDDQNKLTAHSKDHKPVTLDIPGLEGDIKSLALDEKQNLHALTSTGGLYCLPKEAWQSTKLGDQMRARWTPVALPGGQPVKALFANDDNVLSAQVEDAEGQGLMRLSAGKW…	4092	1363
PamICMP3918_AvrE1a_1	PamICMP3918	AvrE	AvrE	AvrE	AvrE1	17	NA	92	GTGCATTCATCATCGATCCACCGCAACACCGGAAGCATCATTCAGCCGCCAGTCCCGGCAAACACGAACGCTGCAACTGATCTACAGCAAAAAATCGAACAACCCAAACAACGCTCCTCCCACTCACTGAGCAGTGTCGGCAAGCGAGCGCTGAAGAACGTCAGCAAACTGTTCCAGAAATCCAAGGCACCGCAGCAGAAAGCGGCCACGCCTCCCACCGTAAAAAACGTCAAGCCTTCACAGCCCACTTCAAATGCGAAGACAGCCAAAGATAAAGCGCCTGTATCTCAGTTATCGAGCAATAGTCTTGATGACCTGGACGATACGCGCCAGCCAGTGACGCGTGCGGGGCATAGCGGCGCCAGCACTTCCGGCACCAAAGCCCAAGACCCGGACGAG…	MHSSSIHRNTGSIIQPPVPANTNAATDLQQKIEQPKQRSSHSLSSVGKRALKNVSKLFQKSKAPQQKAATPPTVKNVKPSQPTSNAKTAKDKAPVSQLSSNSLDDLDDTRQPVTRAGHSGASTSGTKAQDPDEPAIIQSSRQPMMTRSNGGRFELKDEKLVRNSEPQGSIQLDDKGKPDFSTFNTPGLAPLLDSILATPRQTYLAHQSKDGVHGHQLLQANGHLLHLAQDDSSLALIRSSKEALHIEGKKPPAVKLEREDGNIHIDTASGRKTQELPGKAHIAHITGVLLRHDGERMRVHEDRLYQFDPLSARWKAPEGTEDIAFNSLATGGNGSVYAKSDDVVVDLTSPFMPHIEVKDLQSFSVAPDNRAALLSGKETQAILLTDMSPVIGDLTEKKT…	5145	1714
PbrICMP13650_AvrE1a_1	PbrICMP13650	AvrE	AvrE	AvrE	AvrE1	17	NA	93	GTGCATTCATCCTCGATCCACCGCAACACCGGAAGCATCATTCAGCCGCCAGTCCCGGCAAACACGAACGCTGCAACTGATCTACAGCAAAAAATCGAACAACCCAAACAACGCTCCTCCCACTCACTGAGCAGTGTCGGCAAGCGAGCGCTGAAGAACGTCAGCAAACTGTTCCAGAAATCCAAGGCACCGCAGCAGAAAGCGGCCACGCCTCCCACCGTAAAAAACGTCAAGCCTTCACAGCCCACTTCAAATGCGAAGACAGCCAAAGATAAAGCGCCTGTATCTCAGTTATCGAGCAATAGTCTTGATGACCTGGACGATACGCGCCAGCCAGTGATGCGTGCGGGGCATAGCGGCGCCAGCACTTCCGGCACCAAAGCCCAAGACCCGGACGAG…	MHSSSIHRNTGSIIQPPVPANTNAATDLQQKIEQPKQRSSHSLSSVGKRALKNVSKLFQKSKAPQQKAATPPTVKNVKPSQPTSNAKTAKDKAPVSQLSSNSLDDLDDTRQPVMRAGHSGASTSGTKAQDPDEPATIQSSRQSMMTRSNGGRFELKDEKLVRNSEPQGSIQLDAKGKPDFSTFNTPGLAPLLDSILATPRQTYLAHQSKDGVHGHQLLQANGHLLHLAQDDSSLALIRSSKEALHIEGKKPPAVKLEREDGNIHIDTASGRKTQELPGKAHIAHITGVLLRHDGERMRVHEDRLYQFDPLSARWKAPEGTEDIAFNSLATGGNGSVYAKSDDVVVDLTSPFMPHIEVKDLQSFSVAPDNRAALLSGKETQAILLTDMSPVIGDLTEKKT…	5145	1714
PbrICMP13684_AvrE1a_1	PbrICMP13684	AvrE	AvrE	AvrE	AvrE1	17	NA	94	ATGCCGCACATCGAAGTCAAGGATCTGCAGTCATTTTCGGTGGCACCGGACAACAGAGCGGCATTGCTCAGCGGCAAGGAGACTCAGGCGATCCTGCTCACAGACATGAGCCCGGTGATTGGCGATCTGACCGAGAAGAAAACAAAAGCGCTTGAACTCGACGGCGGCAAGGCGCAAGCGGCTGCGGTCGGCCTGAGCGACAACAAGCTGTTCATAGCAGACACCCAAGGCAGACTTTACAGCGCGGACCGTAGTGCATTTGAAAGCAATGACCCGCAATTGAAGCTGACGCCCGATCAGGCAAACTTTCAACTGGCAGGCCTGCCGCTGGGTGGCCACGACAGCGTCACCGGATTCATCAACGGGGATGACGGCCGTGTGCATGCATTGATCAAAAAC…	MPHIEVKDLQSFSVAPDNRAALLSGKETQAILLTDMSPVIGDLTEKKTKALELDGGKAQAAAVGLSDNKLFIADTQGRLYSADRSAFESNDPQLKLTPDQANFQLAGLPLGGHDSVTGFINGDDGRVHALIKNRQGEIHSHALNEQYSKLESGWNLTNALVLSNNRGLSMPPPPTAADRLNLDRAGLVGLSEGRIQRWDATPECWKDAGIKDIERLQRGADSNAYVLKGGKLHALKVTPEHPNMAFDHNTALAQTARSTTVEMGKEIEGLDDRVITAFAMVSNKCFVALDDQNKLTAHSKDHKPFTLDIPGLEGDIKSLALDEKQNLHALTSTGGLYCLPKEAWQSTKLGDQMRARWTPVALPGGQPVKALFANDDNVLSAQIEDAEGQGLMRLSAGKW…	4092	1363
PbrICMP13685_AvrE1a_1	PbrICMP13685	AvrE	AvrE	AvrE	AvrE1	17	NA	95	ATGGGCTTTACCGATAACAAAGCGCTGGAAAGCGGTTATGAAGCGGTCAAGACATTCCTCAAATCGTTCAAAAAAGCTGACCATGCCGTGAGCGTCAACATGCGCGCAGCCACAGGCAGCAAGGACCAGGCGGAGCTGGCCGGGAAATTCAAAAGCATGCTCAAGCAACTGGAGCATGGCGACGACGAAATCAGGCTGCAACGCAGTTACGGACTGAACCTTACCACCCCGTTCATCATGCTTGCCGACAAGTCCACAGGACTATGGCCAACGGCAGGCACCACCGGCAACCGTAACTACATACTCAATGCCGAGCGTTGCGAGGGCGGCGTTACCCTGTATCTGATCAGCGAAGGTGCGGGAAACGTAAGCGGTGGCTTCGGTGCCGGCAAAGACTAC…	MGFTDNKALESGYEAVKTFLKSFKKADHAVSVNMRAATGSKDQAELAGKFKSMLKQLEHGDDEIRLQRSYGLNLTTPFIMLADKSTGLWPTAGTTGNRNYILNAERCEGGVTLYLISEGAGNVSGGFGAGKDYWPGFFDENHPARSVDVGNNRTLTPNFRLGVDVTATVAASQRAGVVFNVPDEDIDAFVDDLFEGKLNPLQVLKKAVDHETYEARRFNFDLTAGGTADLRAGINLTEDRDPDADPNSDSFYAVVRGGFAANITVNLMTYTDYSLTQKNDKTELREGGKNRPRFLNNATLGGQLRGQIGGTHTAPTGTPASAPGPTPASQTAANNLGVAVNFSVENRTVKRVKFRYNVAKPITTEGLGKLSKSLGEAFKDSTTKAKLAELADPLNARYA…	1920	639
PbrICMP13685_AvrE1a_2	PbrICMP13685	AvrE	AvrE	AvrE	AvrE1	17	NA	96	GTGCATTCATCCTCGATCCACCGCAACACCGGAAGCATCATTCAGCCGCCAGTCCCGGCAAACACGAACGCTGCAACTGATCTACAGCAAAAAATCGAACAACCCAAACAACGCTCCTCCCACTCACTGAGCAGTGTCGGCAAGCGAGCGCTGAAGAACGTCAGCAAACTGTTCCAGAAATCCAAGGCACCGCAGCAGAAAGCGGCCACGCCTCCCACCGTAAAAAACGTCAAGCCTTCACAGCCCACTTCAAATGCGAAGACAGCCAAAGATAAAGCGCCTGTATCTCAGTTATCGAGCAATAGTCTTGATGACCTGGACGATACGCGCCAGCCAGTGATGCGTGCGGGGCATAGCGGCGCCAGCACTTCCGGCACCAAAGCCCAAGACCCGGACGAG…	MHSSSIHRNTGSIIQPPVPANTNAATDLQQKIEQPKQRSSHSLSSVGKRALKNVSKLFQKSKAPQQKAATPPTVKNVKPSQPTSNAKTAKDKAPVSQLSSNSLDDLDDTRQPVMRAGHSGASTSGTKAQDPDEPATIQSSRQSMMTRSNGGRFELKDEKLVRNSEPQGSIQLDAKGKPDFSTFNTPGLAPLLDSILATPRQTYLAHQSKDGVHGHQLLQANGHLLHLAQDDSSLALIRSSKEALHIEGKKPPAVKLEREDGNIHIDTASGRKTQELPGKAHIAHITGVLLRHDGERMRVHEDRLYQFDPLSARWKAPEGTEDIAFNSLATGGNGSVYAKSDDVVVDLTSPFMPHIEVKDLQSFSVAPDNRAALLSGKETQAILLTDMSPVIGDLTEKKT…	3120	1039
PccICMP5710_AvrE1a_1	PccICMP5710	AvrE	AvrE	AvrE	AvrE1	17	NA	97	GTGCATTCATCATCGATCCACCGCAACACCGGGAGCATCATTCAGCCGCCAGTCCCGGCAAACACGAACGCTGCAACGGATCTACAGCAAAAAATCGAACAACCCAAACAACGCTCCTCGCACTCACTGAGCAGTGTCGGCAAGCGAGCGCTGAAGAACGTCAGCAAACTGTTCCAGAAATCCAAGGCACCGCAGCAGAAAGCGGCCACGCCTCCCACCGTAAAAAACGTCAAGCCTTCACAGCCCACTTCAAATTCGAAGACAGCCAAAGACAAAGCGCCTGTATCTCAGTTATCGAGCAATAGTCTTGATGACCTGGAGGATACGCGCCAGCCAGTGACGCGTGCGGGGCATAGCGGCGCCAGCACTTCCGGCACCAAAGCCCAAGACCCGGACGAG…	MHSSSIHRNTGSIIQPPVPANTNAATDLQQKIEQPKQRSSHSLSSVGKRALKNVSKLFQKSKAPQQKAATPPTVKNVKPSQPTSNSKTAKDKAPVSQLSSNSLDDLEDTRQPVTRAGHSGASTSGTKAQDPDEPATLQSSRQSMMTRSNGGRFELKDEKLVRNSEPQGSIQLDAKGKPDFSTFNTPGLAPLLDSILATPMQTYLAHQSKDGVHGHQLLQANGHLLHLAQDDSSLALIRSSKEALHIEGKKPPAVKLEREDGNIHIDTASGRKTQELPGKAHIAHITGVLLRHDGERMRVHEDRLYQFDPLSARWKAPEGTEDIAFNSLATGGNGSVYAKSDDVVVDLTSPFMPHIEVKDLQSFSVAPDNRAALLSGKETQAILLTDMSPVIGDLTEKKT…	5133	1710
PceICMP13927_AvrE1a_1	PceICMP13927	AvrE	AvrE	AvrE	AvrE1	17	NA	98	ATGGGCTTTACCGATAACAAAGCGCTGGAAAGCGGTTATGAAGCGGTCAAGACATTCCTCAAGTCATTCAAAAAAGCTGATCATGCGGTGAGCGTCAACATGCGCGCAGCCACAGGCAGCAAGGACCAGGCGGAACTGGCCGGGAAATTCAAAAGCATGCTCAAGCAACTGGAGCATGGCGACGATGAAATCGGGCTGCAACGCAGTTACGGACTGAACCTTACCACCCCGTTCATCATTCTTGCCGACAAGGCCATAGGAATATGGCCAACGGCAGGTACCACCGGCAACCGTAACTACATACTCAATGCCGAGCGTTGCGAGGGCGGCGTTACCCTGTACCTGATCAGCGAAGGTGCGGGAAACGTAAGCGGTGGCTTCGGTGCCGGCAAAGACTAC…	MGFTDNKALESGYEAVKTFLKSFKKADHAVSVNMRAATGSKDQAELAGKFKSMLKQLEHGDDEIGLQRSYGLNLTTPFIILADKAIGIWPTAGTTGNRNYILNAERCEGGVTLYLISEGAGNVSGGFGAGKDYWPGFFDENHPARSVDVGNNRTLTPNFRLGVDVTATVAASQRAGVVFNVPDEDIDAFVDDLFDGKLNPLQVLKKAVDHETYQARRFNFDLTTGGTADLRSGRNLTEDRDPDADPNSNSFSAVVRGGFAANITVNLMTYTDYSLTQKNDKTELREGGKNRPRFLNNATLGGQLRGQLRGQIGGTHTAPTGTPASAPGPMPASQSAANNLGVAVNFSVENRTVKRVKFRYNVAKPITTEGLGKLSKSLGEAFKDNTTKAKLAELAYPLN…	1932	643
PceICMP13928_AvrE1a_1	PceICMP13928	AvrE	AvrE	AvrE	AvrE1	17	NA	99	GTGCATTCATCATCGATCCACCGCAACACCGGGAGCATCATTCAGCCGCCAGTCCCGGCAAACACGAACGCTGCAACGGATCTACAGCAAAAAATCGAACAACCCAAACAACGCTCCTCGCACTCACTGAGCAGTGTCGGCAAGCGAGCGCTGAAGAACGTCAGCAAACTGTTCCAGAAATCCAAGGCACCGCAGCAGAAAGCGGCCACGCCTCCCACCGTAAAAAACGTCAAGCCTTCACAGCCCACTTCAAATTCGAAGACAGCCAAAGACAAAGCGCCTGTATCTCAGTTATCGAGCAATAGTCTTGATGGCCTGGAGGATACGCGCCAGCCAGTGACGCGTGCGGGGCATAGCGGCGCCAGCACTTCCGGCACCAAAGCCCAAGACCCGGACGAG…	MHSSSIHRNTGSIIQPPVPANTNAATDLQQKIEQPKQRSSHSLSSVGKRALKNVSKLFQKSKAPQQKAATPPTVKNVKPSQPTSNSKTAKDKAPVSQLSSNSLDGLEDTRQPVTRAGHSGASTSGTKAQDPDEPATLQSSRQSMMTRSNGGRFELKDEKLVRNSEPQGSIQLDAKGKPDFSTFNTPGLAPLLDSILATPMQTYLAHQSKDGVHGHQLLQANGHLLHLAQDDSSLALIRSSKEALHIEGKKPPAVKLEREDGNIHIDTASGRKTQELPGKAHIAHITGVLLRHDGERMRVHEDRLYQFDPLSARWKAPEGTEDIAFNSLATGGNGSVYAKSDDVVVDLTSPFMPHIEVKDLQSFSVAPDNRAALLSGKETQAILLTDMSPVIGDLTEKKT…	5157	1718
PceICMP17525_AvrE1a_1	PceICMP17525	AvrE	AvrE	AvrE	AvrE1	17	NA	99	GTGCATTCATCATCGATCCACCGCAACACCGGGAGCATCATTCAGCCGCCAGTCCCGGCAAACACGAACGCTGCAACGGATCTACAGCAAAAAATCGAACAACCCAAACAACGCTCCTCGCACTCACTGAGCAGTGTCGGCAAGCGAGCGCTGAAGAACGTCAGCAAACTGTTCCAGAAATCCAAGGCACCGCAGCAGAAAGCGGCCACGCCTCCCACCGTAAAAAACGTCAAGCCTTCACAGCCCACTTCAAATTCGAAGACAGCCAAAGACAAAGCGCCTGTATCTCAGTTATCGAGCAATAGTCTTGATGGCCTGGAGGATACGCGCCAGCCAGTGACGCGTGCGGGGCATAGCGGCGCCAGCACTTCCGGCACCAAAGCCCAAGACCCGGACGAG…	MHSSSIHRNTGSIIQPPVPANTNAATDLQQKIEQPKQRSSHSLSSVGKRALKNVSKLFQKSKAPQQKAATPPTVKNVKPSQPTSNSKTAKDKAPVSQLSSNSLDGLEDTRQPVTRAGHSGASTSGTKAQDPDEPATLQSSRQSMMTRSNGGRFELKDEKLVRNSEPQGSIQLDAKGKPDFSTFNTPGLAPLLDSILATPMQTYLAHQSKDGVHGHQLLQANGHLLHLAQDDSSLALIRSSKEALHIEGKKPPAVKLEREDGNIHIDTASGRKTQELPGKAHIAHITGVLLRHDGERMRVHEDRLYQFDPLSARWKAPEGTEDIAFNSLATGGNGSVYAKSDDVVVDLTSPFMPHIEVKDLQSFSVAPDNRAALLSGKETQAILLTDMSPVIGDLTEKKT…	5157	1718
PceICMP17524_AvrE1a_1	PceICMP17524	AvrE	AvrE	AvrE	AvrE1	17	NA	100	GTGCATTCATCATCGATCCACCGCAACACCGGGAGCATCATTCAGCCGCCAGTCCCGGCAAACACGAACGCTGCAACGGATCTACAGCAAAAAATCGAACAACCCAAACAACGCTCCTCGCACTCACTGAGCAGTGTCGGCAAGCGAGCGCTGAAGAACGTCAGCAAACTGTTCCAGAAATCCAAGGCACCGCAGCAGAAAGCGGCCACGCCTCCCACCGTAAAAAACGTCAAGCCTTCACAGCCCACTTCAAATTCGAAGACAGCCAAAGACAAAGCGCCTGTATCTCAGTTATCGAGCAATAGTCTTGATGGCCTGGAGGATACGCGCCAGCCAGTGACGCGTGCGGGGCATAGCGGCGCCAGCACTTCCGGCACCAAAGCCCAAGACCCGGACGAG…	MHSSSIHRNTGSIIQPPVPANTNAATDLQQKIEQPKQRSSHSLSSVGKRALKNVSKLFQKSKAPQQKAATPPTVKNVKPSQPTSNSKTAKDKAPVSQLSSNSLDGLEDTRQPVTRAGHSGASTSGTKAQDPDEPATLQSSRQSMMTRSNGGRFELKDEKLVRNSEPQGSIQLDAKGKPDFSTFNTPGLAPLLDSILATPMQTYLAHQSKDGVHGHQLLQANGHLLHLAQDDSSLALIRSSKEALHIEGKKPPAVKLERKDGNIHIDTASGRKTQELPGKAHIAHITGVLLRHDGERMRVHEDRLYQFDPLSARWKAPEGTEDIAFNSLATGGNGSVYAKSDDVVVDLTSPFMPHIEVKDLQSFSVAPDNRAALLSGKETQAILLTDMSPVIGDLTEKKT…	5157	1718
PcsICMP9419_AvrE1a_1	PcsICMP9419	AvrE	AvrE	AvrE	AvrE1	17	NA	101	GTGCATTCATCATCGATCCACCGCAACACCGGGAGCATCATTCAGCCGCCAGTCCCGGCAAACACGAACGCTGCAACGGATCTACAGCAAAAAACCGAACAACCCAAACAACGCTCCTCGCACTCACTGAGCAGTGTCGGCAAGCGAGCGCTGAAGAACGTCAGCAAACTGTTCCAGAAATCCAAGGCACCGCAGCAGAAAGCGGCCACGCCTCCCACCGTAAAAAACGTCAAGCCTTCACAGCCCACTTCAAATGCGAAGACAGCCAAAGATAAAGCGCCTGTATCTCAGTTATCGAGCAATAGTCTTGATGACCTGGAGGATACGCGCCAGCCAGTGACGCGTGCGGGGCATAGCGGCGCCAGCACTTCCGGCACCAAAGCCCAAGACCCGGACGAG…	MHSSSIHRNTGSIIQPPVPANTNAATDLQQKTEQPKQRSSHSLSSVGKRALKNVSKLFQKSKAPQQKAATPPTVKNVKPSQPTSNAKTAKDKAPVSQLSSNSLDDLEDTRQPVTRAGHSGASTSGTKAQDPDEPATLQSSRQSMMTRSNGGRFELKDEKLVRNSEPRGSIQLDAKGKPDFSTFNTPGLAPLLDSILAPPMQTYLAHQSKDGVHGHQLLQANGHLLHLAQDDSSLALIRSSKEALHIEGKKPPAVKLEREDGNIHIDTASGRKTQELPGKAHIAHITGVLLRHDGERMRVHEDRLYQFDPLSARWKAPEGTEDIAFNSLATGGNGSVYAKSDDVVVDLTSPFMPHIEVKDLQSFSVAPDNRAALLSGKETQAILLTDMSPVIGDLTEKKT…	5145	1714
PcsICMP9420_AvrE1a_1	PcsICMP9420	AvrE	AvrE	AvrE	AvrE1	17	NA	101	GTGCATTCATCATCGATCCACCGCAACACCGGGAGCATCATTCAGCCGCCAGTCCCGGCAAACACGAACGCTGCAACGGATCTACAGCAAAAAACCGAACAACCCAAACAACGCTCCTCGCACTCACTGAGCAGTGTCGGCAAGCGAGCGCTGAAGAACGTCAGCAAACTGTTCCAGAAATCCAAGGCACCGCAGCAGAAAGCGGCCACGCCTCCCACCGTAAAAAACGTCAAGCCTTCACAGCCCACTTCAAATGCGAAGACAGCCAAAGATAAAGCGCCTGTATCTCAGTTATCGAGCAATAGTCTTGATGACCTGGAGGATACGCGCCAGCCAGTGACGCGTGCGGGGCATAGCGGCGCCAGCACTTCCGGCACCAAAGCCCAAGACCCGGACGAG…	MHSSSIHRNTGSIIQPPVPANTNAATDLQQKTEQPKQRSSHSLSSVGKRALKNVSKLFQKSKAPQQKAATPPTVKNVKPSQPTSNAKTAKDKAPVSQLSSNSLDDLEDTRQPVTRAGHSGASTSGTKAQDPDEPATLQSSRQSMMTRSNGGRFELKDEKLVRNSEPRGSIQLDAKGKPDFSTFNTPGLAPLLDSILAPPMQTYLAHQSKDGVHGHQLLQANGHLLHLAQDDSSLALIRSSKEALHIEGKKPPAVKLEREDGNIHIDTASGRKTQELPGKAHIAHITGVLLRHDGERMRVHEDRLYQFDPLSARWKAPEGTEDIAFNSLATGGNGSVYAKSDDVVVDLTSPFMPHIEVKDLQSFSVAPDNRAALLSGKETQAILLTDMSPVIGDLTEKKT…	5145	1714
PcsICMP9421_AvrE1a_1	PcsICMP9421	AvrE	AvrE	AvrE	AvrE1	17	NA	102	GTGCATTCATCATCGATCCACCGCAACACCGGGAGCATCATTCAGCCGCCAGTCCCGGCAAACACGAACGCTGCAACGGATCTACAGCAAAAAACCGAACAACCCAAACAACGCTCCTCGCACTCACTGAGCAGTGTCGGCAAGCGAGCGCTGAAGAACGTCAGCAAACTGTTCCAGAAATCCAAGGCACCGCAGCAGAAAGCGGCCACGCCTCCCACCGTAAAAAACGTCAAGCCTTCACAGCCCACTTCAAATGCGAAGACAGCCAAAGATAAAGCGCCTGTATCTCAGTTATCGAGCAATAGTCTTGATGACCTGGAGGATACGCGCCAGCCAGTGACGCGTGCGGGGCATAGCGGCGCCAGCACTTCCGGCACCAAAGCCCAAGACCCGGACGAG…	MHSSSIHRNTGSIIQPPVPANTNAATDLQQKTEQPKQRSSHSLSSVGKRALKNVSKLFQKSKAPQQKAATPPTVKNVKPSQPTSNAKTAKDKAPVSQLSSNSLDDLEDTRQPVTRAGHSGASTSGTKAQDPDEPATLQSSRQSMMTRSNGGRFELKDEKLVRNSEPQGSIQLDVKGKPDFSTFNTPGLAPLLDSILATPMQTYLAHQSKDGVHGHQLLQANGHLLHLAQDDSSLALIRSSKEALHIEGKKPPAVKLEREDGNIHIDTASGRKTQELPGKAHIAHITGVLLRHDGERMRMHEDRLYQFDPLSARWKAPEGTEDIAFNSLATGGNGSVYAKSDDVVVDLTSPFMPHIEVKDLQSFSVAPDNRAALLSGKETQAILLTDMSPVIGDLTEKKT…	5145	1714
PcuICMP11894_AvrE1a_1	PcuICMP11894	AvrE	AvrE	AvrE	AvrE1	17	NA	103	ATGGGCTTTACCGATAACAAAGCGCTGGAAAGCGGTTATGAAGCGGTCAAGACATTCCTCAAGTCATTCAAAAAAGCTGATCATGCGGTGAGCGTCAACATGCGCGCAGCCACAGGCAGCAAGGACCAGGCGGAACTGGCCGGGAAATTCAAAAGCATGCTCAAGCAACTGGAGCATGGCGACGATGAAATCGGGCTGCAACGCAGTTACGGACTGAACCTTACCACCCCGTTCATCATTCTTGCCGACAAGGCCACAGGAATATGGCCAACGGCAGGTACCACCGGCAACCGTAACTACATACTCAATGCCGAGCGTTGCGAGGGCGGCGTTACCCTGTACCTGATCAGCGAAGGTGCGGGAAACGTAAGCGGTGGCTTCGGTGCCGGCAAAGACTAC…	MGFTDNKALESGYEAVKTFLKSFKKADHAVSVNMRAATGSKDQAELAGKFKSMLKQLEHGDDEIGLQRSYGLNLTTPFIILADKATGIWPTAGTTGNRNYILNAERCEGGVTLYLISEGAGNVSGGFGAGKDYWPGFFDENHPARSVDVGNNRTLTPNFRLGVDVTATVAASQRAGVVFNVPDEDIDAFVDDLFEGKLNPLQVLKKAVDHETYQARRFNFDLTAGGTADLRSGINLTEDRDPDADPNSNSFSAVVRGGFAANITVNLMTYTDYSLTQKNDKTELREGGKNRPRFLNNATLGGQLRGQIRGTHTAPTGTPASAPGPTPASQSAANNLGVAVNFSVENRTVKRVKFRYNVAKPITTEGLGKLSKSLGEAFKDSTTKAKLAELADPLNARYA…	1920	639
PcuICMP11895_AvrE1a_1	PcuICMP11895	AvrE	AvrE	AvrE	AvrE1	17	NA	103	ATGGGCTTTACCGATAACAAAGCGCTGGAAAGCGGTTATGAAGCGGTCAAGACATTCCTCAAGTCATTCAAAAAAGCTGATCATGCGGTGAGCGTCAACATGCGCGCAGCCACAGGCAGCAAGGACCAGGCGGAACTGGCCGGGAAATTCAAAAGCATGCTCAAGCAACTGGAGCATGGCGACGATGAAATCGGGCTGCAACGCAGTTACGGACTGAACCTTACCACCCCGTTCATCATTCTTGCCGACAAGGCCACAGGAATATGGCCAACGGCAGGTACCACCGGCAACCGTAACTACATACTCAATGCCGAGCGTTGCGAGGGCGGCGTTACCCTGTACCTGATCAGCGAAGGTGCGGGAAACGTAAGCGGTGGCTTCGGTGCCGGCAAAGACTAC…	MGFTDNKALESGYEAVKTFLKSFKKADHAVSVNMRAATGSKDQAELAGKFKSMLKQLEHGDDEIGLQRSYGLNLTTPFIILADKATGIWPTAGTTGNRNYILNAERCEGGVTLYLISEGAGNVSGGFGAGKDYWPGFFDENHPARSVDVGNNRTLTPNFRLGVDVTATVAASQRAGVVFNVPDEDIDAFVDDLFEGKLNPLQVLKKAVDHETYQARRFNFDLTAGGTADLRSGINLTEDRDPDADPNSNSFSAVVRGGFAANITVNLMTYTDYSLTQKNDKTELREGGKNRPRFLNNATLGGQLRGQIRGTHTAPTGTPASAPGPTPASQSAANNLGVAVNFSVENRTVKRVKFRYNVAKPITTEGLGKLSKSLGEAFKDSTTKAKLAELADPLNARYA…	1920	639
PcuICMP11894_AvrE1a_2	PcuICMP11894	AvrE	AvrE	AvrE	AvrE1	17	NA	104	GTGCATTCATCATCGATCCACCGCAACACCGGGAGCATCATTCAGCCGCCAGTCCCGGCAAACACGAACGCTGCAACGGATCTACAGCAAAAAATCGAACAACCCAAACAACGCTCCTCGCACTCACTGAGCAGTGTCGGCAAGCGAGCGCTGAAGAACGTCAGCAAACTGTTCCAGAAATCCAAGGCACCGCAGCAGAAAGCGGCCACGCCTCCCACCGTAAAAAACGTCAAGCCTTCACAGCCCACTTCAAATTCGAAGACAGCCAAAGACAAAGCGCCTGTATCTCAGTTATCGAGCAATAGTCTTGATGACCTGGAGGATACGCGCCAGCCAGTGACGCGTGCGGGGCATAGCGGCGCCAGCACTTCCGGCACCAAAGCCCAAGACCCGGACGAG…	MHSSSIHRNTGSIIQPPVPANTNAATDLQQKIEQPKQRSSHSLSSVGKRALKNVSKLFQKSKAPQQKAATPPTVKNVKPSQPTSNSKTAKDKAPVSQLSSNSLDDLEDTRQPVTRAGHSGASTSGTKAQDPDEPATLQSSRQSMMTRSNGGRFELKDEKLVRNSEPQGSIQLDAKGKPDFSTFNTPGLAPLLDSVLATPMQTYLAHQSKDGVHGHQLLQANGHLLHLAQDDSSLALIRSSKEALHIEGKKPPAVKLEREDGNIHIDTASGRKTQELPGKAHIAHITGVLLRHDGERMRVHEDRLYQFDPLSARWKAPEGTEDIAFNSLATGGNGSVYAKSDDVVVDLTSPFMPHIEVKDLQSFSVAPDNRAALLSGKETQAILLTDMSPVIGDLTEKKT…	3186	1061
PcuICMP11895_AvrE1a_2	PcuICMP11895	AvrE	AvrE	AvrE	AvrE1	17	NA	105	GTGCATTCATCATCGATCCACCGCAACACCGGGAGCATCATTCAGCCGCCAGTCCCGGCAAACACGAACGCTGCAACGGATCTACAGCAAAAAATCGAACAACCCAAACAACGCTCCTCGCACTCACTGAGCAGTGTCGGCAAGCGAGCGCTGAAGAACGTCAGCAAACTGTTCCAGAAATCCAAGGCACCGCAGCAGAAAGCGGCCACGCCTCCCACCGTAAAAAACGTCAAGCCTTCACAGCCCACTTCAAATTCGAAGACAGCCAAAGACAAAGCGCCTGTATCTCAGTTATCGAGCAATAGTCTTGATGACCTGGAGGATACGCGCCAGCCAGTGACGCGTGCGGGGCATAGCGGCGCCAGCACTTCCGGCACCAAAGCCCAAGACCCGGACGAG…	MHSSSIHRNTGSIIQPPVPANTNAATDLQQKIEQPKQRSSHSLSSVGKRALKNVSKLFQKSKAPQQKAATPPTVKNVKPSQPTSNSKTAKDKAPVSQLSSNSLDDLEDTRQPVTRAGHSGASTSGTKAQDPDEPATLQSSRQSMMTRSNGGRFELKDEKLVRNSEPQGSIQLDAKGKPDFSTFNTPGLAPLLDSVLATPMQTYLAHQSKDGVHGHQLLQANGHLLHLAQDDSSLALIRSSKEALHIEGKKPPAVKLEREDGNIHIDTASGRKTQELPGKAHIAHITGVLLRHDGERMRVHEDRLYQFDPLSARWKAPEGTEDIAFNSLATGGNGSVYAKSDDVVVDLTSPFMPHIEVKDLQSFSVAPDNRAALLSGKETQAILLTDMSPVIGDLTEKKT…	3165	1054
PcuICMP11897_AvrE1a_1	PcuICMP11897	AvrE	AvrE	AvrE	AvrE1	17	NA	106	GTGCATTCATCATCGATCCACCGCAACACCGGGAGCATCATTCAGCCGCCAGTCCCGGCAAACACGAACGCTGCAACGGATCTACAGCAAAAAATCGAACAACCCAAACAACGCTCCTCGCACTCACTGAGCAGTGTCGGCAAGCGAGCGCTGAAGAACGTCAGCAAACTGTTCCAGAAATCCAAGGCACCGCAGCAGAAAGCGGCCACGCCTCCCACCGTAAAAAACGTCAAGCCTTCACAGCCCACTTCAAATTCGAAGACAGCCAAAGACAAAGCGCCTGTATCTCAGTTATCGAGCAATAGTCTTGATGACCTGGAGGATACGCGCCAGCCAGTGACGCGTGCGGGGCATAGCGGCGCCAGCACTTCCGGCACCAAAGCCCAAGACCCGGACGAG…	MHSSSIHRNTGSIIQPPVPANTNAATDLQQKIEQPKQRSSHSLSSVGKRALKNVSKLFQKSKAPQQKAATPPTVKNVKPSQPTSNSKTAKDKAPVSQLSSNSLDDLEDTRQPVTRAGHSGASTSGTKAQDPDEPATLQSSRQSMMTRSNGGRFELKDEKLVRNSEPQGSIQLDAKGKPDFSTFNTPGLAPLLDSVLATPMQTYLAHQSKDGVHGHQLLQANGHLLHLAQDDSSLALIRSSKEALHIEGKKPPAVKLEREDGNIHIDTASGRKTQELPGKAHIAHITGVLLRHDGERMRVHEDRLYQFDPLSARWKAPEGTEDIAFNSLATGGNGSVYAKSDDVVVDLTSPFMPHIEVKDLQSFSVAPDNRAALLSGKETQAILLTDMSPVIGDLTEKKT…	5142	1713
PcuICMP11899_AvrE1a_1	PcuICMP11899	AvrE	AvrE	AvrE	AvrE1	17	NA	107	GTGCATTCATCATCGATCCACCGCAACACCGGGAGCATCATTCAGCCGCCAGTCCCGGCAAACACGAACGCTGCAACGGATCTACAGCAAAAAATCGAACAACCCAAACAACGCTCCTCGCACTCACTGAGCAGTGTCGGCAAGCGAGCGCTGAAGAACGTCAGCAAACTGTTCCAGAAATCCAAGGCACCGCAGCAGAAAGCGGCCACGCCTCCCACCGTAAAAAACGTCAAGCCTTCACAGCCCACTTCAAATTCGAAGACAGCCAAAGACAAAGCGCCTGTATCTCAGTTATCGAGCAATAGTCTTGATGACCTGGAGGATACGCGCCAGCCAGTGACGCGTGCGGGGCATAGCGGCGCCAGCACTTCCGGCACCAAAGCCCAAGACCCGGACGAG…	MHSSSIHRNTGSIIQPPVPANTNAATDLQQKIEQPKQRSSHSLSSVGKRALKNVSKLFQKSKAPQQKAATPPTVKNVKPSQPTSNSKTAKDKAPVSQLSSNSLDDLEDTRQPVTRAGHSGASTSGTKAQDPDEPATLQSSRQSMMTRSNGGRFELKDEKLVRNSEPQGSIQLDAKGKPDFSTFNTPGLAPLLDSVLATPMQTYLAHQSKDGVHGHQLLQANGHLLHLAQDDSSLALIRSSKEALHIEGKKPPAVKLEREDGNIHIDTASGRKTQELPGKAHIAHITGVLLRHDGERMRVHEDRLYQFDPLSARWKAPEGTEDIAFNSLATGGNGSVYAKSDDVVVDLTSPFMPHIEVKDLQSFSVAPDNRAALLSGKETQAILLTDMSPVIGDLTEKKT…	5145	1714
PdaICMP9757_AvrE1a_1	PdaICMP9757	AvrE	AvrE	AvrE	AvrE1	17	NA	108	GTGCATTCATCATCGATCCACCGCAACACCGGGAGCATCATTCAGCCGCCAGTCCCGGCAAACACGAACGCTGCAACGGATCTACAGCAAAAAATCGAACAACCCAAACAACGCTCCTCGCACTCACTGAGCAGTGTCGGCAAGCGAGCGCTGAAGAACGTCAGCAAACTGTTCCAGAAATCCAAGGCACCGCAGCAGAAAGCGGCCACGCCTCCCACCGTAAAAAACGTCAAGCCTTCACAGCCCACTTCAAATTCGAAGACAGCCAAAGACAAAGCGCCTGTATCTCAGTTATCGAGCAATAGTCTTGATGACCTGGAGGATACGCGCCAGCCAGTGACGCGTGCGGGGCATAGCGGCGCCAGCACTTCCGGCACCAAAGCCCAAGACCCGGACGAG…	MHSSSIHRNTGSIIQPPVPANTNAATDLQQKIEQPKQRSSHSLSSVGKRALKNVSKLFQKSKAPQQKAATPPTVKNVKPSQPTSNSKTAKDKAPVSQLSSNSLDDLEDTRQPVTRAGHSGASTSGTKAQDPDEPATLQSSRQSMMTRSNGGRFELKDEKLVRNSEPQGSIQLDAKGKPDFSTFNTPGLAPLLDSVLATPMQTYLAHQSKDGVHGHQLLQANGHLLHLAQDDSSLALIRSSKEALHIEGKKPPAVKLEREDGNIHIDTASGRKTQELPGKAHIAHITGVLLRHDGERMRVHEDRLYQFDPLSARWKAPEGTEDIAFNSLATGGNGSVYAKSDDVVVDLTSPFMPHIEVKDLQSFSVAPDNRAALLSGKETQAILLTDMSPVIGDLTEKKT…	5145	1714
PdeICMP9150_AvrE1a_1	PdeICMP9150	AvrE	AvrE	AvrE	AvrE1	17	NA	109	GTGCATTCATCATCGATCCACCGCAACACCGGGAGCATCATTCAGCCGCCAGTCCCGGCAAACACGAACGCTGCAACGGATCTACAGCAAAAAATCGAACAACCCAAACAACGCTCCTCGCACTCACTGAGCAGTGTCGGCAAGCGAGCGCTGAAGAACGTCAGCAAACTGTTCCAGAAATCCAAGGCACCGCAGCAGAAAGCGGCCACGCCTCCCACCGTAAAAAACGTCAAGCCTTCACAGCCCACTTCAAATTCGAAGACAGCCAAAGACAAAGCGCCTGTATCTCAGTTATCGAGCAATAGTCTTGATGACCTGGAGGATACGCGCCAGCCAGTGACGCGTGCGCGGCATAGCGGCGCCAGCACTTCCGGCACCAAAGCCCAAGACCCGGACGAG…	MHSSSIHRNTGSIIQPPVPANTNAATDLQQKIEQPKQRSSHSLSSVGKRALKNVSKLFQKSKAPQQKAATPPTVKNVKPSQPTSNSKTAKDKAPVSQLSSNSLDDLEDTRQPVTRARHSGASTSGTKAQDPDEPATLQSSRQSMMTRSNGGRFELKDEKLVRNSEPQGSIQLDAKGKPDFSTFNTPGLAPLLDSVLATPMQTYLAHQSKDGVHGHQLLQANGHLLHLAQDDSSLALIRSSKEALHIEGKKPPAVKLEREDGNIHIDTASGRKTQELPGKAHIAHITGVLLRHDGERMRVHEDRLYQFDPLSARWKAPEGTEDIAFNSLATGGNGSVYAKSDDVVVDLTSPFMPHIEVKDLQSFSVAPDNRAALLSGKETQAILLTDMSPVIGDLTEEKT…	5145	1714
PerICMP4316_AvrE1a_1	PerICMP4316	AvrE	AvrE	AvrE	AvrE1	17	NA	110	GTGCATTCATCATCGATCCACCGCAACACCGGGAGCATCATTCAGCCGCCAGTCCCGGCAAACACAAACGCTGCAACGGATCTACAGCAAAAAATCGAACAACCCAAACAACGCTCCTCGCACTCACTGAGCAGTGTCGGCAAGCGAGCGCTGAAGAACGTCAGCAAACTGTTCCAGAAATCCAAGGCACCGCAGCAGAAAGCGGCCACGCCTCCCACCGTAAAAAACGTCAAGCCTTCACAGCCCACTTCAAATTCGAAGACAGCCAAAGACAAAGCGCCTGTATCTCAGTTATCGAGCAATAGTCTTGATGACCTGGAGGATACGCGCCAGCCAGTGACGCGTGCGGGGCATAGCGGCGCCAGCACTTCCGGCACCAAAGCCCAAGACCCGGACGAG…	MHSSSIHRNTGSIIQPPVPANTNAATDLQQKIEQPKQRSSHSLSSVGKRALKNVSKLFQKSKAPQQKAATPPTVKNVKPSQPTSNSKTAKDKAPVSQLSSNSLDDLEDTRQPVTRAGHSGASTSGTKAQDPDEPATLQSSRQSMMTRSNGGRFELKDEKLVRNSEPQGSIQLDAKGKPDFSTFNTPGLAPLLDSILATPMQTYLAHQSKDGVHGHQLLQANGHLLHLAQDDSSLALIRSSKEALHIEGKKPPAVKLEREDGNIHIDTASGRKTQELPGKAHIAHITGVLLRHDGERMRVHEDRLYQFDPLSARWKAPEGTEDIAFNSLATGGNGSVYAKSDDVVVDLTSPFMPHIEVKDLQSFSVAPDNRAALLSGKETQAILLTDMRPVIGDLTEKKT…	5145	1714
PerICMP8636_AvrE1a_1	PerICMP8636	AvrE	AvrE	AvrE	AvrE1	17	NA	110	GTGCATTCATCATCGATCCACCGCAACACCGGGAGCATCATTCAGCCGCCAGTCCCGGCAAACACAAACGCTGCAACGGATCTACAGCAAAAAATCGAACAACCCAAACAACGCTCCTCGCACTCACTGAGCAGTGTCGGCAAGCGAGCGCTGAAGAACGTCAGCAAACTGTTCCAGAAATCCAAGGCACCGCAGCAGAAAGCGGCCACGCCTCCCACCGTAAAAAACGTCAAGCCTTCACAGCCCACTTCAAATTCGAAGACAGCCAAAGACAAAGCGCCTGTATCTCAGTTATCGAGCAATAGTCTTGATGACCTGGAGGATACGCGCCAGCCAGTGACGCGTGCGGGGCATAGCGGCGCCAGCACTTCCGGCACCAAAGCCCAAGACCCGGACGAG…	MHSSSIHRNTGSIIQPPVPANTNAATDLQQKIEQPKQRSSHSLSSVGKRALKNVSKLFQKSKAPQQKAATPPTVKNVKPSQPTSNSKTAKDKAPVSQLSSNSLDDLEDTRQPVTRAGHSGASTSGTKAQDPDEPATLQSSRQSMMTRSNGGRFELKDEKLVRNSEPQGSIQLDAKGKPDFSTFNTPGLAPLLDSILATPMQTYLAHQSKDGVHGHQLLQANGHLLHLAQDDSSLALIRSSKEALHIEGKKPPAVKLEREDGNIHIDTASGRKTQELPGKAHIAHITGVLLRHDGERMRVHEDRLYQFDPLSARWKAPEGTEDIAFNSLATGGNGSVYAKSDDVVVDLTSPFMPHIEVKDLQSFSVAPDNRAALLSGKETQAILLTDMRPVIGDLTEKKT…	5145	1714
PerICMP4455_AvrE1a_1	PerICMP4455	AvrE	AvrE	AvrE	AvrE1	17	NA	111	GTGCTCAAGGGCGGCAAACTGCACGCGCTCAAGGTGACTCCTGAACACCCCAACATGGCCTTTGACCACAACACAGCGCTGGCCCAGACCGCGCGCTCGACAACAGTCGAGATGGGCAAGGAAATCGAAGGCCTCGACGACCGGGTGATCACAGCCTTTGCAATGGTCAGCAACAAAAGCTTCGTCGCCCTTGATGACCAGAACAAGCTGACCGCCCACAGCAAGGATCACAAACCCGTCACTCTCGATATCCCCGGCCTGGAAGGCGATATCAAGAGCCTTGCTCTGGATGAAAAACAGAACCTTCATGCGCTCACCAGTACCGGCGGGCTTTATTGCCTGCCCAAGGAAGCTTGGCAATCGACAAAGCTGGGGGATCAGATGCGCGCCCGCTGGACG…	MLKGGKLHALKVTPEHPNMAFDHNTALAQTARSTTVEMGKEIEGLDDRVITAFAMVSNKSFVALDDQNKLTAHSKDHKPVTLDIPGLEGDIKSLALDEKQNLHALTSTGGLYCLPKEAWQSTKLGDQMRARWTPVALPGGQPVKALFANDDNVLSAQVEDAEGQGLMRLSAGKWQAFEQRPVEENGLNDVHSRITGSNKTWRIPKTGLTLRMDINAFGRSGVEKSKKASTREFMRANVYKNTAEVPRWMKNVGNSIQHRHHGRLGLNEVYETESMLFKQLELINESGGRPPAPGKDLKARIAALESKLGPQGATLVKELETLREELENHSYTALMSIGQSYGKVKNLRQQDGILNQHGELAKPSVRTQFGKKLAELGTKLNFKSSGHDLVKELQDALTQ…	3417	1138
PfiICMP7848_AvrE1a_1	PfiICMP7848	AvrE	AvrE	AvrE	AvrE1	17	NA	112	GTGCATTCATCCTCGATCCACCGCAACACCGGAAGCATCATTCAGCCGCCAGTCCCGGCAAACACGAACGCTGCAACTGATCTACAGCAAAAAATCGAACAACCCAAACAACGCTCCTCCCACTCACTGAGCAGCGTCGGCAAGCGAGCGCTGAAGAACGTCAGCAAACTGTTCCAGAAATCCAAGGCACCGCAGCAGAAAGCGGCCACGCCTCCCACCGTAAAAAACGTCAAGCCTTCACAGCCCACTTCAAATGCGAAGACAGCCAAAGATAAAGCGCCTGTATCTCAGTTATCGAGCAATAGTCTTGATGACCTGGACGATACGCGCCAGCCAGTGATGCGTGCGGGGCATAGCGGCGCCAGCACTTCCGGCACCAAAGCCCAAGACCCGGACGAG…	MHSSSIHRNTGSIIQPPVPANTNAATDLQQKIEQPKQRSSHSLSSVGKRALKNVSKLFQKSKAPQQKAATPPTVKNVKPSQPTSNAKTAKDKAPVSQLSSNSLDDLDDTRQPVMRAGHSGASTSGTKAQDPDEPATIQSSRQSMMTRSNGGRFELKDEKLVRNSEPQGSIQLDAKGKPDFSTFNTPGLAPLLDSILATPRQTYLAHQSKDGVHGHQLLQANGHLLHLAQDDSSLALIRSSKEALHIEGKKPPAVKLEREDGNIHIDTASGRKTQELPGKAHIAHITGVLLRHDGXXXXGERMRVHEDRLYQFDPLSARWKAPEGTEDIAFNSLATGGNGSVYAKSDDVVVDLTSPFMPHIEVKDLQSFSVAPDNRAALLSGKETQAILLTDMSPVIGDL…	5160	1719
PfiICMP7849_AvrE1a_1	PfiICMP7849	AvrE	AvrE	AvrE	AvrE1	17	NA	113	GTGCATTCATCCTCGATCCACCGCAACACCGGAAGCATCATTCAGCCGCCAGTCCCGGCAAACACGAACGCTGCAACTGATCTACAGCAAAAAATCGAACAACCCAAACAACGCTCCTCCCACTCACTGAGCAGCGTCGGCAAGCGAGCGCTGAAGAACGTCAGCAAACTGTTCCAGAAATCCAAGGCACCGCAGCAGAAAGCGGCCACGCCTCCCACCGTAAAAAACGTCAAGCCTTCACAGCCCACTTCAAATGCGAAGACAGCCAAAGATAAAGCGCCTGTATCTCAGTTATCGAGCAATAGTCTTGATGACCTGGACGATACGCGCCAGCCAGTGATGCGTGCGGGGCATAGCGGCGCCAGCACTTCCGGCACCAAAGCCCAAGACCCGGACGAG…	MHSSSIHRNTGSIIQPPVPANTNAATDLQQKIEQPKQRSSHSLSSVGKRALKNVSKLFQKSKAPQQKAATPPTVKNVKPSQPTSNAKTAKDKAPVSQLSSNSLDDLDDTRQPVMRAGHSGASTSGTKAQDPDEPATIQSSRQSMMTRSNGGRFELKDEKLVRNSEPQGSIQLDAKGKPDFSTFNTPGLAPLLDSILATPRQTYLAHQSKDGVHGHQLLQANGHLLHLAQDDSSLALIRSSKEALHIEGKKPPAVKLEREDGNIHIDTASGRKTQELPGKAHIAHITGVLLRHDGERMRVHEDRLYQFDPLSARWKAPEGTEDIAFNSLATGGNGSVYAKSDDVVVDLTSPFMPHIEVKDLQSFSVAPDNRAALLSGKETQAILLTDMSPVIGDLTEKKT…	5145	1714
PfiICMP7850_AvrE1a_1	PfiICMP7850	AvrE	AvrE	AvrE	AvrE1	17	NA	113	GTGCATTCATCCTCGATCCACCGCAACACCGGAAGCATCATTCAGCCGCCAGTCCCGGCAAACACGAACGCTGCAACTGATCTACAGCAAAAAATCGAACAACCCAAACAACGCTCCTCCCACTCACTGAGCAGCGTCGGCAAGCGAGCGCTGAAGAACGTCAGCAAACTGTTCCAGAAATCCAAGGCACCGCAGCAGAAAGCGGCCACGCCTCCCACCGTAAAAAACGTCAAGCCTTCACAGCCCACTTCAAATGCGAAGACAGCCAAAGATAAAGCGCCTGTATCTCAGTTATCGAGCAATAGTCTTGATGACCTGGACGATACGCGCCAGCCAGTGATGCGTGCGGGGCATAGCGGCGCCAGCACTTCCGGCACCAAAGCCCAAGACCCGGACGAG…	MHSSSIHRNTGSIIQPPVPANTNAATDLQQKIEQPKQRSSHSLSSVGKRALKNVSKLFQKSKAPQQKAATPPTVKNVKPSQPTSNAKTAKDKAPVSQLSSNSLDDLDDTRQPVMRAGHSGASTSGTKAQDPDEPATIQSSRQSMMTRSNGGRFELKDEKLVRNSEPQGSIQLDAKGKPDFSTFNTPGLAPLLDSILATPRQTYLAHQSKDGVHGHQLLQANGHLLHLAQDDSSLALIRSSKEALHIEGKKPPAVKLEREDGNIHIDTASGRKTQELPGKAHIAHITGVLLRHDGERMRVHEDRLYQFDPLSARWKAPEGTEDIAFNSLATGGNGSVYAKSDDVVVDLTSPFMPHIEVKDLQSFSVAPDNRAALLSGKETQAILLTDMSPVIGDLTEKKT…	5145	1714
PfrICMP7711_AvrE1a_1	PfrICMP7711	AvrE	AvrE	AvrE	AvrE1	17	NA	114	GTGCATTCATCATCGATCCACCGCAACACCGGGAGCATCATTCAGCCGCCAGTCCCGGCAAACACGAACGCTGCAACGGATCTACAGCAAAAAATCGAACAACCCAAACAACGCTCCTCGCACTCACTGAGCAGTGTCGGCAAGCGAGCGCTGAAGAACGTCAGCAAACTGTTCCAGAAATCCAAGGCACCGCAGCAGAAAGCGGCCACGCCTCCCACCGTAAAAAACGTCAAGCCTTCACAGCCCACTTCAAATTCGAAGACAGCCAAAGACAAAGCGCCTGTATCTCAGTTATCGAGCAATAGTCTTGATGACCTGGAGGATACGCGCCAGCCAGTGACGCGTGCGGGGCATAGCGGCGCCAGCACTTCCGGCACCAAAGCCCAAGACCCGGACGAG…	MHSSSIHRNTGSIIQPPVPANTNAATDLQQKIEQPKQRSSHSLSSVGKRALKNVSKLFQKSKAPQQKAATPPTVKNVKPSQPTSNSKTAKDKAPVSQLSSNSLDDLEDTRQPVTRAGHSGASTSGTKAQDPDEPATLQSSRQSMMTRSNGGRFELKDEKLVRNSEPQGSIQLGAKGKPDFSTFNTPGLAPLLDSILATPMQTYLAHQSKDGVHGHQLLQANGHLLHLAQDDSSLALIRSSKEALHIEGKKPPAVKLEREDGNIHIDTASGRKTQELPGKAHIAHITGVLLRHDGERMRVHEDRLYQFDPLSARWKAPEGTEDIAFNSLATGGNGSVYAKSDDVVVDLTSPFMPHIEVKDLQSFSVAPDNRAALLSGKETQAILLTDMSPVIGDLTEKKT…	5157	1718
PfrICMP9132_AvrE1a_1	PfrICMP9132	AvrE	AvrE	AvrE	AvrE1	17	NA	114	GTGCATTCATCATCGATCCACCGCAACACCGGGAGCATCATTCAGCCGCCAGTCCCGGCAAACACGAACGCTGCAACGGATCTACAGCAAAAAATCGAACAACCCAAACAACGCTCCTCGCACTCACTGAGCAGTGTCGGCAAGCGAGCGCTGAAGAACGTCAGCAAACTGTTCCAGAAATCCAAGGCACCGCAGCAGAAAGCGGCCACGCCTCCCACCGTAAAAAACGTCAAGCCTTCACAGCCCACTTCAAATTCGAAGACAGCCAAAGACAAAGCGCCTGTATCTCAGTTATCGAGCAATAGTCTTGATGACCTGGAGGATACGCGCCAGCCAGTGACGCGTGCGGGGCATAGCGGCGCCAGCACTTCCGGCACCAAAGCCCAAGACCCGGACGAG…	MHSSSIHRNTGSIIQPPVPANTNAATDLQQKIEQPKQRSSHSLSSVGKRALKNVSKLFQKSKAPQQKAATPPTVKNVKPSQPTSNSKTAKDKAPVSQLSSNSLDDLEDTRQPVTRAGHSGASTSGTKAQDPDEPATLQSSRQSMMTRSNGGRFELKDEKLVRNSEPQGSIQLGAKGKPDFSTFNTPGLAPLLDSILATPMQTYLAHQSKDGVHGHQLLQANGHLLHLAQDDSSLALIRSSKEALHIEGKKPPAVKLEREDGNIHIDTASGRKTQELPGKAHIAHITGVLLRHDGERMRVHEDRLYQFDPLSARWKAPEGTEDIAFNSLATGGNGSVYAKSDDVVVDLTSPFMPHIEVKDLQSFSVAPDNRAALLSGKETQAILLTDMSPVIGDLTEKKT…	5157	1718
PfrICMP7712_AvrE1a_1	PfrICMP7712	AvrE	AvrE	AvrE	AvrE1	17	NA	115	GTGCATTCATCATCGATCCACCGCAACACCGGGAGCATCATTCAGCCGCCAGTCCCGGCAAACACGAACGCTGCAACGGATCTACAGCAAAAAATCGAACAACCCAAACAACGCTCCTCGCACTCACTGAGCAGTGTCGGCAAGCGAGCGCTGAAGAACGTCAGCAAACTGTTCCAGAAATCCAAGGCACCGCAGCAGAAAGCGGCCACGCCTCCCACCGTAAAAAACGTCAAGCCTTCACAGCCCACTTCAAATTTGAAGACAGCCAAAGACAAAGCGCCTGTATCTCAGTTATCGAGCAATAGTCTTGATGACCTGGAGGATACGCGCCAGCCAGTGACGCGTGCGGGGCATAGCGGCGCCAGCACTTCCGGCACCAAAGCCCAAGACCCGGACGAG…	MHSSSIHRNTGSIIQPPVPANTNAATDLQQKIEQPKQRSSHSLSSVGKRALKNVSKLFQKSKAPQQKAATPPTVKNVKPSQPTSNLKTAKDKAPVSQLSSNSLDDLEDTRQPVTRAGHSGASTSGTKAQDPDEPATLQSSRQSMMTRSNGGRFELKDEKLVRNSEPQGSIQLGAKGKPDFSTFNTPGLAPLLDSILATPMQTYLAHQSKDGVHGHQLLQANGHLLHLAQDDSSLALIRSSKEALHIEGKKPPAVKLEREDGNIHIDTASGRKTQELPGKAHIAHITGVLLRHDGERMRVHEDRLYQFDPLSARWKAPEGTEDIAFNSLATGGNGSVYAKSDDVVVDLTSPFMPHIEVKDLQSFSVAPDNRAALLSGKETQAILLTDMSPVIGDLTEKKT…	5157	1718
PfrICMP9129_AvrE1a_1	PfrICMP9129	AvrE	AvrE	AvrE	AvrE1	17	NA	115	GTGCATTCATCATCGATCCACCGCAACACCGGGAGCATCATTCAGCCGCCAGTCCCGGCAAACACGAACGCTGCAACGGATCTACAGCAAAAAATCGAACAACCCAAACAACGCTCCTCGCACTCACTGAGCAGTGTCGGCAAGCGAGCGCTGAAGAACGTCAGCAAACTGTTCCAGAAATCCAAGGCACCGCAGCAGAAAGCGGCCACGCCTCCCACCGTAAAAAACGTCAAGCCTTCACAGCCCACTTCAAATTTGAAGACAGCCAAAGACAAAGCGCCTGTATCTCAGTTATCGAGCAATAGTCTTGATGACCTGGAGGATACGCGCCAGCCAGTGACGCGTGCGGGGCATAGCGGCGCCAGCACTTCCGGCACCAAAGCCCAAGACCCGGACGAG…	MHSSSIHRNTGSIIQPPVPANTNAATDLQQKIEQPKQRSSHSLSSVGKRALKNVSKLFQKSKAPQQKAATPPTVKNVKPSQPTSNLKTAKDKAPVSQLSSNSLDDLEDTRQPVTRAGHSGASTSGTKAQDPDEPATLQSSRQSMMTRSNGGRFELKDEKLVRNSEPQGSIQLGAKGKPDFSTFNTPGLAPLLDSILATPMQTYLAHQSKDGVHGHQLLQANGHLLHLAQDDSSLALIRSSKEALHIEGKKPPAVKLEREDGNIHIDTASGRKTQELPGKAHIAHITGVLLRHDGERMRVHEDRLYQFDPLSARWKAPEGTEDIAFNSLATGGNGSVYAKSDDVVVDLTSPFMPHIEVKDLQSFSVAPDNRAALLSGKETQAILLTDMSPVIGDLTEKKT…	5157	1718
PgyB076_AvrE1a_1	PgyB076	AvrE	AvrE	AvrE	AvrE1	17	NA	116	GTGCATTCATCCTCGATCCACCGCAACACCGGATGCATCATTCAGCCGCCAGCCCCGGCAAACACGAACGCTGCAACTGATCTACAGCAAAAAATCGAACAACCCAAACAACGCTCCTCCCACTCACTGAGCAGTGTCGGCAAGCGAGCGCTGAAGAACGTCAGCAAACTGTTCCAGAAATCCAAGGCACCGCAGCAGAAAGCGGCCACGCCTCCCACCGTAAAAAACGTCAAGCCTTCACAGCCCACTCCAAATGCGAAGACAGCCAAAGATAAAGCGCCTGTATCTCAGTTATCGAGCAATAGTCTTGATGACCTGGACGATACGCGCCAGCCAGTAACGCGTGCGGGGCATAGCGGCGCCAGCACTTCTGGCACCAAAGCCCAAGACCCGGACGAG…	MHSSSIHRNTGCIIQPPAPANTNAATDLQQKIEQPKQRSSHSLSSVGKRALKNVSKLFQKSKAPQQKAATPPTVKNVKPSQPTPNAKTAKDKAPVSQLSSNSLDDLDDTRQPVTRAGHSGASTSGTKAQDPDEPATLQSSRQSMMTRSNGGRFELKDEKLVRNSEPQGSIQLDAKGKPDFSTFNTPGLAPLLDSILAPPRQTYLAHQSKDGVHGHQLLQANGHLLHLAQDDSSLALIRSSKEALHIEGKKPPAVKLEREDGNIHIDTASGRKTQELPGKAHIAHITGVLLRHDGERMRVHEDRLYQFDPLSARWKAPEGTEDIAFNSLATGGNGSVYAKSDDVVVDLTSPFMPHIEVKDLQSFSVAPDNRAALLSGKETQAILLTDMSPVIGDLTEKKT…	5145	1714
PgyBR1_AvrE1a_1	PgyBR1	AvrE	AvrE	AvrE	AvrE1	17	NA	116	GTGCATTCATCCTCGATCCACCGCAACACCGGATGCATCATTCAGCCGCCAGCCCCGGCAAACACGAACGCTGCAACTGATCTACAGCAAAAAATCGAACAACCCAAACAACGCTCCTCCCACTCACTGAGCAGTGTCGGCAAGCGAGCGCTGAAGAACGTCAGCAAACTGTTCCAGAAATCCAAGGCACCGCAGCAGAAAGCGGCCACGCCTCCCACCGTAAAAAACGTCAAGCCTTCACAGCCCACTCCAAATGCGAAGACAGCCAAAGATAAAGCGCCTGTATCTCAGTTATCGAGCAATAGTCTTGATGACCTGGACGATACGCGCCAGCCAGTAACGCGTGCGGGGCATAGCGGCGCCAGCACTTCTGGCACCAAAGCCCAAGACCCGGACGAG…	MHSSSIHRNTGCIIQPPAPANTNAATDLQQKIEQPKQRSSHSLSSVGKRALKNVSKLFQKSKAPQQKAATPPTVKNVKPSQPTPNAKTAKDKAPVSQLSSNSLDDLDDTRQPVTRAGHSGASTSGTKAQDPDEPATLQSSRQSMMTRSNGGRFELKDEKLVRNSEPQGSIQLDAKGKPDFSTFNTPGLAPLLDSILAPPRQTYLAHQSKDGVHGHQLLQANGHLLHLAQDDSSLALIRSSKEALHIEGKKPPAVKLEREDGNIHIDTASGRKTQELPGKAHIAHITGVLLRHDGERMRVHEDRLYQFDPLSARWKAPEGTEDIAFNSLATGGNGSVYAKSDDVVVDLTSPFMPHIEVKDLQSFSVAPDNRAALLSGKETQAILLTDMSPVIGDLTEKKT…	5145	1714
PgyICMP10450_AvrE1a_1	PgyICMP10450	AvrE	AvrE	AvrE	AvrE1	17	NA	116	GTGCATTCATCCTCGATCCACCGCAACACCGGATGCATCATTCAGCCGCCAGCCCCGGCAAACACGAACGCTGCAACTGATCTACAGCAAAAAATCGAACAACCCAAACAACGCTCCTCCCACTCACTGAGCAGTGTCGGCAAGCGAGCGCTGAAGAACGTCAGCAAACTGTTCCAGAAATCCAAGGCACCGCAGCAGAAAGCGGCCACGCCTCCCACCGTAAAAAACGTCAAGCCTTCACAGCCCACTCCAAATGCGAAGACAGCCAAAGATAAAGCGCCTGTATCTCAGTTATCGAGCAATAGTCTTGATGACCTGGACGATACGCGCCAGCCAGTAACGCGTGCGGGGCATAGCGGCGCCAGCACTTCTGGCACCAAAGCCCAAGACCCGGACGAG…	MHSSSIHRNTGCIIQPPAPANTNAATDLQQKIEQPKQRSSHSLSSVGKRALKNVSKLFQKSKAPQQKAATPPTVKNVKPSQPTPNAKTAKDKAPVSQLSSNSLDDLDDTRQPVTRAGHSGASTSGTKAQDPDEPATLQSSRQSMMTRSNGGRFELKDEKLVRNSEPQGSIQLDAKGKPDFSTFNTPGLAPLLDSILAPPRQTYLAHQSKDGVHGHQLLQANGHLLHLAQDDSSLALIRSSKEALHIEGKKPPAVKLEREDGNIHIDTASGRKTQELPGKAHIAHITGVLLRHDGERMRVHEDRLYQFDPLSARWKAPEGTEDIAFNSLATGGNGSVYAKSDDVVVDLTSPFMPHIEVKDLQSFSVAPDNRAALLSGKETQAILLTDMSPVIGDLTEKKT…	5145	1714
PgyICMP2189_AvrE1a_1	PgyICMP2189	AvrE	AvrE	AvrE	AvrE1	17	NA	116	GTGCATTCATCCTCGATCCACCGCAACACCGGATGCATCATTCAGCCGCCAGCCCCGGCAAACACGAACGCTGCAACTGATCTACAGCAAAAAATCGAACAACCCAAACAACGCTCCTCCCACTCACTGAGCAGTGTCGGCAAGCGAGCGCTGAAGAACGTCAGCAAACTGTTCCAGAAATCCAAGGCACCGCAGCAGAAAGCGGCCACGCCTCCCACCGTAAAAAACGTCAAGCCTTCACAGCCCACTCCAAATGCGAAGACAGCCAAAGATAAAGCGCCTGTATCTCAGTTATCGAGCAATAGTCTTGATGACCTGGACGATACGCGCCAGCCAGTAACGCGTGCGGGGCATAGCGGCGCCAGCACTTCTGGCACCAAAGCCCAAGACCCGGACGAG…	MHSSSIHRNTGCIIQPPAPANTNAATDLQQKIEQPKQRSSHSLSSVGKRALKNVSKLFQKSKAPQQKAATPPTVKNVKPSQPTPNAKTAKDKAPVSQLSSNSLDDLDDTRQPVTRAGHSGASTSGTKAQDPDEPATLQSSRQSMMTRSNGGRFELKDEKLVRNSEPQGSIQLDAKGKPDFSTFNTPGLAPLLDSILAPPRQTYLAHQSKDGVHGHQLLQANGHLLHLAQDDSSLALIRSSKEALHIEGKKPPAVKLEREDGNIHIDTASGRKTQELPGKAHIAHITGVLLRHDGERMRVHEDRLYQFDPLSARWKAPEGTEDIAFNSLATGGNGSVYAKSDDVVVDLTSPFMPHIEVKDLQSFSVAPDNRAALLSGKETQAILLTDMSPVIGDLTEKKT…	5145	1714
PgyICMP4180_AvrE1a_1	PgyICMP4180	AvrE	AvrE	AvrE	AvrE1	17	NA	116	GTGCATTCATCCTCGATCCACCGCAACACCGGATGCATCATTCAGCCGCCAGCCCCGGCAAACACGAACGCTGCAACTGATCTACAGCAAAAAATCGAACAACCCAAACAACGCTCCTCCCACTCACTGAGCAGTGTCGGCAAGCGAGCGCTGAAGAACGTCAGCAAACTGTTCCAGAAATCCAAGGCACCGCAGCAGAAAGCGGCCACGCCTCCCACCGTAAAAAACGTCAAGCCTTCACAGCCCACTCCAAATGCGAAGACAGCCAAAGATAAAGCGCCTGTATCTCAGTTATCGAGCAATAGTCTTGATGACCTGGACGATACGCGCCAGCCAGTAACGCGTGCGGGGCATAGCGGCGCCAGCACTTCTGGCACCAAAGCCCAAGACCCGGACGAG…	MHSSSIHRNTGCIIQPPAPANTNAATDLQQKIEQPKQRSSHSLSSVGKRALKNVSKLFQKSKAPQQKAATPPTVKNVKPSQPTPNAKTAKDKAPVSQLSSNSLDDLDDTRQPVTRAGHSGASTSGTKAQDPDEPATLQSSRQSMMTRSNGGRFELKDEKLVRNSEPQGSIQLDAKGKPDFSTFNTPGLAPLLDSILAPPRQTYLAHQSKDGVHGHQLLQANGHLLHLAQDDSSLALIRSSKEALHIEGKKPPAVKLEREDGNIHIDTASGRKTQELPGKAHIAHITGVLLRHDGERMRVHEDRLYQFDPLSARWKAPEGTEDIAFNSLATGGNGSVYAKSDDVVVDLTSPFMPHIEVKDLQSFSVAPDNRAALLSGKETQAILLTDMSPVIGDLTEKKT…	5145	1714
PgyICMP4181_AvrE1a_1	PgyICMP4181	AvrE	AvrE	AvrE	AvrE1	17	NA	116	GTGCATTCATCCTCGATCCACCGCAACACCGGATGCATCATTCAGCCGCCAGCCCCGGCAAACACGAACGCTGCAACTGATCTACAGCAAAAAATCGAACAACCCAAACAACGCTCCTCCCACTCACTGAGCAGTGTCGGCAAGCGAGCGCTGAAGAACGTCAGCAAACTGTTCCAGAAATCCAAGGCACCGCAGCAGAAAGCGGCCACGCCTCCCACCGTAAAAAACGTCAAGCCTTCACAGCCCACTCCAAATGCGAAGACAGCCAAAGATAAAGCGCCTGTATCTCAGTTATCGAGCAATAGTCTTGATGACCTGGACGATACGCGCCAGCCAGTAACGCGTGCGGGGCATAGCGGCGCCAGCACTTCTGGCACCAAAGCCCAAGACCCGGACGAG…	MHSSSIHRNTGCIIQPPAPANTNAATDLQQKIEQPKQRSSHSLSSVGKRALKNVSKLFQKSKAPQQKAATPPTVKNVKPSQPTPNAKTAKDKAPVSQLSSNSLDDLDDTRQPVTRAGHSGASTSGTKAQDPDEPATLQSSRQSMMTRSNGGRFELKDEKLVRNSEPQGSIQLDAKGKPDFSTFNTPGLAPLLDSILAPPRQTYLAHQSKDGVHGHQLLQANGHLLHLAQDDSSLALIRSSKEALHIEGKKPPAVKLEREDGNIHIDTASGRKTQELPGKAHIAHITGVLLRHDGERMRVHEDRLYQFDPLSARWKAPEGTEDIAFNSLATGGNGSVYAKSDDVVVDLTSPFMPHIEVKDLQSFSVAPDNRAALLSGKETQAILLTDMSPVIGDLTEKKT…	5145	1714
PgyICMP4182_AvrE1a_1	PgyICMP4182	AvrE	AvrE	AvrE	AvrE1	17	NA	116	GTGCATTCATCCTCGATCCACCGCAACACCGGATGCATCATTCAGCCGCCAGCCCCGGCAAACACGAACGCTGCAACTGATCTACAGCAAAAAATCGAACAACCCAAACAACGCTCCTCCCACTCACTGAGCAGTGTCGGCAAGCGAGCGCTGAAGAACGTCAGCAAACTGTTCCAGAAATCCAAGGCACCGCAGCAGAAAGCGGCCACGCCTCCCACCGTAAAAAACGTCAAGCCTTCACAGCCCACTCCAAATGCGAAGACAGCCAAAGATAAAGCGCCTGTATCTCAGTTATCGAGCAATAGTCTTGATGACCTGGACGATACGCGCCAGCCAGTAACGCGTGCGGGGCATAGCGGCGCCAGCACTTCTGGCACCAAAGCCCAAGACCCGGACGAG…	MHSSSIHRNTGCIIQPPAPANTNAATDLQQKIEQPKQRSSHSLSSVGKRALKNVSKLFQKSKAPQQKAATPPTVKNVKPSQPTPNAKTAKDKAPVSQLSSNSLDDLDDTRQPVTRAGHSGASTSGTKAQDPDEPATLQSSRQSMMTRSNGGRFELKDEKLVRNSEPQGSIQLDAKGKPDFSTFNTPGLAPLLDSILAPPRQTYLAHQSKDGVHGHQLLQANGHLLHLAQDDSSLALIRSSKEALHIEGKKPPAVKLEREDGNIHIDTASGRKTQELPGKAHIAHITGVLLRHDGERMRVHEDRLYQFDPLSARWKAPEGTEDIAFNSLATGGNGSVYAKSDDVVVDLTSPFMPHIEVKDLQSFSVAPDNRAALLSGKETQAILLTDMSPVIGDLTEKKT…	5145	1714
PgyICMP4402_AvrE1a_1	PgyICMP4402	AvrE	AvrE	AvrE	AvrE1	17	NA	116	GTGCATTCATCCTCGATCCACCGCAACACCGGATGCATCATTCAGCCGCCAGCCCCGGCAAACACGAACGCTGCAACTGATCTACAGCAAAAAATCGAACAACCCAAACAACGCTCCTCCCACTCACTGAGCAGTGTCGGCAAGCGAGCGCTGAAGAACGTCAGCAAACTGTTCCAGAAATCCAAGGCACCGCAGCAGAAAGCGGCCACGCCTCCCACCGTAAAAAACGTCAAGCCTTCACAGCCCACTCCAAATGCGAAGACAGCCAAAGATAAAGCGCCTGTATCTCAGTTATCGAGCAATAGTCTTGATGACCTGGACGATACGCGCCAGCCAGTAACGCGTGCGGGGCATAGCGGCGCCAGCACTTCTGGCACCAAAGCCCAAGACCCGGACGAG…	MHSSSIHRNTGCIIQPPAPANTNAATDLQQKIEQPKQRSSHSLSSVGKRALKNVSKLFQKSKAPQQKAATPPTVKNVKPSQPTPNAKTAKDKAPVSQLSSNSLDDLDDTRQPVTRAGHSGASTSGTKAQDPDEPATLQSSRQSMMTRSNGGRFELKDEKLVRNSEPQGSIQLDAKGKPDFSTFNTPGLAPLLDSILAPPRQTYLAHQSKDGVHGHQLLQANGHLLHLAQDDSSLALIRSSKEALHIEGKKPPAVKLEREDGNIHIDTASGRKTQELPGKAHIAHITGVLLRHDGERMRVHEDRLYQFDPLSARWKAPEGTEDIAFNSLATGGNGSVYAKSDDVVVDLTSPFMPHIEVKDLQSFSVAPDNRAALLSGKETQAILLTDMSPVIGDLTEKKT…	5145	1714
PgyICMP4631_AvrE1a_1	PgyICMP4631	AvrE	AvrE	AvrE	AvrE1	17	NA	116	GTGCATTCATCCTCGATCCACCGCAACACCGGATGCATCATTCAGCCGCCAGCCCCGGCAAACACGAACGCTGCAACTGATCTACAGCAAAAAATCGAACAACCCAAACAACGCTCCTCCCACTCACTGAGCAGTGTCGGCAAGCGAGCGCTGAAGAACGTCAGCAAACTGTTCCAGAAATCCAAGGCACCGCAGCAGAAAGCGGCCACGCCTCCCACCGTAAAAAACGTCAAGCCTTCACAGCCCACTCCAAATGCGAAGACAGCCAAAGATAAAGCGCCTGTATCTCAGTTATCGAGCAATAGTCTTGATGACCTGGACGATACGCGCCAGCCAGTAACGCGTGCGGGGCATAGCGGCGCCAGCACTTCTGGCACCAAAGCCCAAGACCCGGACGAG…	MHSSSIHRNTGCIIQPPAPANTNAATDLQQKIEQPKQRSSHSLSSVGKRALKNVSKLFQKSKAPQQKAATPPTVKNVKPSQPTPNAKTAKDKAPVSQLSSNSLDDLDDTRQPVTRAGHSGASTSGTKAQDPDEPATLQSSRQSMMTRSNGGRFELKDEKLVRNSEPQGSIQLDAKGKPDFSTFNTPGLAPLLDSILAPPRQTYLAHQSKDGVHGHQLLQANGHLLHLAQDDSSLALIRSSKEALHIEGKKPPAVKLEREDGNIHIDTASGRKTQELPGKAHIAHITGVLLRHDGERMRVHEDRLYQFDPLSARWKAPEGTEDIAFNSLATGGNGSVYAKSDDVVVDLTSPFMPHIEVKDLQSFSVAPDNRAALLSGKETQAILLTDMSPVIGDLTEKKT…	5145	1714
PgyICMP5378_AvrE1a_1	PgyICMP5378	AvrE	AvrE	AvrE	AvrE1	17	NA	116	GTGCATTCATCCTCGATCCACCGCAACACCGGATGCATCATTCAGCCGCCAGCCCCGGCAAACACGAACGCTGCAACTGATCTACAGCAAAAAATCGAACAACCCAAACAACGCTCCTCCCACTCACTGAGCAGTGTCGGCAAGCGAGCGCTGAAGAACGTCAGCAAACTGTTCCAGAAATCCAAGGCACCGCAGCAGAAAGCGGCCACGCCTCCCACCGTAAAAAACGTCAAGCCTTCACAGCCCACTCCAAATGCGAAGACAGCCAAAGATAAAGCGCCTGTATCTCAGTTATCGAGCAATAGTCTTGATGACCTGGACGATACGCGCCAGCCAGTAACGCGTGCGGGGCATAGCGGCGCCAGCACTTCTGGCACCAAAGCCCAAGACCCGGACGAG…	MHSSSIHRNTGCIIQPPAPANTNAATDLQQKIEQPKQRSSHSLSSVGKRALKNVSKLFQKSKAPQQKAATPPTVKNVKPSQPTPNAKTAKDKAPVSQLSSNSLDDLDDTRQPVTRAGHSGASTSGTKAQDPDEPATLQSSRQSMMTRSNGGRFELKDEKLVRNSEPQGSIQLDAKGKPDFSTFNTPGLAPLLDSILAPPRQTYLAHQSKDGVHGHQLLQANGHLLHLAQDDSSLALIRSSKEALHIEGKKPPAVKLEREDGNIHIDTASGRKTQELPGKAHIAHITGVLLRHDGERMRVHEDRLYQFDPLSARWKAPEGTEDIAFNSLATGGNGSVYAKSDDVVVDLTSPFMPHIEVKDLQSFSVAPDNRAALLSGKETQAILLTDMSPVIGDLTEKKT…	5145	1714
PgyICMP5559_AvrE1a_1	PgyICMP5559	AvrE	AvrE	AvrE	AvrE1	17	NA	116	GTGCATTCATCCTCGATCCACCGCAACACCGGATGCATCATTCAGCCGCCAGCCCCGGCAAACACGAACGCTGCAACTGATCTACAGCAAAAAATCGAACAACCCAAACAACGCTCCTCCCACTCACTGAGCAGTGTCGGCAAGCGAGCGCTGAAGAACGTCAGCAAACTGTTCCAGAAATCCAAGGCACCGCAGCAGAAAGCGGCCACGCCTCCCACCGTAAAAAACGTCAAGCCTTCACAGCCCACTCCAAATGCGAAGACAGCCAAAGATAAAGCGCCTGTATCTCAGTTATCGAGCAATAGTCTTGATGACCTGGACGATACGCGCCAGCCAGTAACGCGTGCGGGGCATAGCGGCGCCAGCACTTCTGGCACCAAAGCCCAAGACCCGGACGAG…	MHSSSIHRNTGCIIQPPAPANTNAATDLQQKIEQPKQRSSHSLSSVGKRALKNVSKLFQKSKAPQQKAATPPTVKNVKPSQPTPNAKTAKDKAPVSQLSSNSLDDLDDTRQPVTRAGHSGASTSGTKAQDPDEPATLQSSRQSMMTRSNGGRFELKDEKLVRNSEPQGSIQLDAKGKPDFSTFNTPGLAPLLDSILAPPRQTYLAHQSKDGVHGHQLLQANGHLLHLAQDDSSLALIRSSKEALHIEGKKPPAVKLEREDGNIHIDTASGRKTQELPGKAHIAHITGVLLRHDGERMRVHEDRLYQFDPLSARWKAPEGTEDIAFNSLATGGNGSVYAKSDDVVVDLTSPFMPHIEVKDLQSFSVAPDNRAALLSGKETQAILLTDMSPVIGDLTEKKT…	5145	1714
PgyICMP5560_AvrE1a_1	PgyICMP5560	AvrE	AvrE	AvrE	AvrE1	17	NA	116	GTGCATTCATCCTCGATCCACCGCAACACCGGATGCATCATTCAGCCGCCAGCCCCGGCAAACACGAACGCTGCAACTGATCTACAGCAAAAAATCGAACAACCCAAACAACGCTCCTCCCACTCACTGAGCAGTGTCGGCAAGCGAGCGCTGAAGAACGTCAGCAAACTGTTCCAGAAATCCAAGGCACCGCAGCAGAAAGCGGCCACGCCTCCCACCGTAAAAAACGTCAAGCCTTCACAGCCCACTCCAAATGCGAAGACAGCCAAAGATAAAGCGCCTGTATCTCAGTTATCGAGCAATAGTCTTGATGACCTGGACGATACGCGCCAGCCAGTAACGCGTGCGGGGCATAGCGGCGCCAGCACTTCTGGCACCAAAGCCCAAGACCCGGACGAG…	MHSSSIHRNTGCIIQPPAPANTNAATDLQQKIEQPKQRSSHSLSSVGKRALKNVSKLFQKSKAPQQKAATPPTVKNVKPSQPTPNAKTAKDKAPVSQLSSNSLDDLDDTRQPVTRAGHSGASTSGTKAQDPDEPATLQSSRQSMMTRSNGGRFELKDEKLVRNSEPQGSIQLDAKGKPDFSTFNTPGLAPLLDSILAPPRQTYLAHQSKDGVHGHQLLQANGHLLHLAQDDSSLALIRSSKEALHIEGKKPPAVKLEREDGNIHIDTASGRKTQELPGKAHIAHITGVLLRHDGERMRVHEDRLYQFDPLSARWKAPEGTEDIAFNSLATGGNGSVYAKSDDVVVDLTSPFMPHIEVKDLQSFSVAPDNRAALLSGKETQAILLTDMSPVIGDLTEKKT…	5145	1714
PgyICMP5562_AvrE1a_1	PgyICMP5562	AvrE	AvrE	AvrE	AvrE1	17	NA	116	GTGCATTCATCCTCGATCCACCGCAACACCGGATGCATCATTCAGCCGCCAGCCCCGGCAAACACGAACGCTGCAACTGATCTACAGCAAAAAATCGAACAACCCAAACAACGCTCCTCCCACTCACTGAGCAGTGTCGGCAAGCGAGCGCTGAAGAACGTCAGCAAACTGTTCCAGAAATCCAAGGCACCGCAGCAGAAAGCGGCCACGCCTCCCACCGTAAAAAACGTCAAGCCTTCACAGCCCACTCCAAATGCGAAGACAGCCAAAGATAAAGCGCCTGTATCTCAGTTATCGAGCAATAGTCTTGATGACCTGGACGATACGCGCCAGCCAGTAACGCGTGCGGGGCATAGCGGCGCCAGCACTTCTGGCACCAAAGCCCAAGACCCGGACGAG…	MHSSSIHRNTGCIIQPPAPANTNAATDLQQKIEQPKQRSSHSLSSVGKRALKNVSKLFQKSKAPQQKAATPPTVKNVKPSQPTPNAKTAKDKAPVSQLSSNSLDDLDDTRQPVTRAGHSGASTSGTKAQDPDEPATLQSSRQSMMTRSNGGRFELKDEKLVRNSEPQGSIQLDAKGKPDFSTFNTPGLAPLLDSILAPPRQTYLAHQSKDGVHGHQLLQANGHLLHLAQDDSSLALIRSSKEALHIEGKKPPAVKLEREDGNIHIDTASGRKTQELPGKAHIAHITGVLLRHDGERMRVHEDRLYQFDPLSARWKAPEGTEDIAFNSLATGGNGSVYAKSDDVVVDLTSPFMPHIEVKDLQSFSVAPDNRAALLSGKETQAILLTDMSPVIGDLTEKKT…	5145	1714
PgyICMP5928_AvrE1a_1	PgyICMP5928	AvrE	AvrE	AvrE	AvrE1	17	NA	116	GTGCATTCATCCTCGATCCACCGCAACACCGGATGCATCATTCAGCCGCCAGCCCCGGCAAACACGAACGCTGCAACTGATCTACAGCAAAAAATCGAACAACCCAAACAACGCTCCTCCCACTCACTGAGCAGTGTCGGCAAGCGAGCGCTGAAGAACGTCAGCAAACTGTTCCAGAAATCCAAGGCACCGCAGCAGAAAGCGGCCACGCCTCCCACCGTAAAAAACGTCAAGCCTTCACAGCCCACTCCAAATGCGAAGACAGCCAAAGATAAAGCGCCTGTATCTCAGTTATCGAGCAATAGTCTTGATGACCTGGACGATACGCGCCAGCCAGTAACGCGTGCGGGGCATAGCGGCGCCAGCACTTCTGGCACCAAAGCCCAAGACCCGGACGAG…	MHSSSIHRNTGCIIQPPAPANTNAATDLQQKIEQPKQRSSHSLSSVGKRALKNVSKLFQKSKAPQQKAATPPTVKNVKPSQPTPNAKTAKDKAPVSQLSSNSLDDLDDTRQPVTRAGHSGASTSGTKAQDPDEPATLQSSRQSMMTRSNGGRFELKDEKLVRNSEPQGSIQLDAKGKPDFSTFNTPGLAPLLDSILAPPRQTYLAHQSKDGVHGHQLLQANGHLLHLAQDDSSLALIRSSKEALHIEGKKPPAVKLEREDGNIHIDTASGRKTQELPGKAHIAHITGVLLRHDGERMRVHEDRLYQFDPLSARWKAPEGTEDIAFNSLATGGNGSVYAKSDDVVVDLTSPFMPHIEVKDLQSFSVAPDNRAALLSGKETQAILLTDMSPVIGDLTEKKT…	5145	1714
PgyICMP6372_AvrE1a_1	PgyICMP6372	AvrE	AvrE	AvrE	AvrE1	17	NA	116	GTGCATTCATCCTCGATCCACCGCAACACCGGATGCATCATTCAGCCGCCAGCCCCGGCAAACACGAACGCTGCAACTGATCTACAGCAAAAAATCGAACAACCCAAACAACGCTCCTCCCACTCACTGAGCAGTGTCGGCAAGCGAGCGCTGAAGAACGTCAGCAAACTGTTCCAGAAATCCAAGGCACCGCAGCAGAAAGCGGCCACGCCTCCCACCGTAAAAAACGTCAAGCCTTCACAGCCCACTCCAAATGCGAAGACAGCCAAAGATAAAGCGCCTGTATCTCAGTTATCGAGCAATAGTCTTGATGACCTGGACGATACGCGCCAGCCAGTAACGCGTGCGGGGCATAGCGGCGCCAGCACTTCTGGCACCAAAGCCCAAGACCCGGACGAG…	MHSSSIHRNTGCIIQPPAPANTNAATDLQQKIEQPKQRSSHSLSSVGKRALKNVSKLFQKSKAPQQKAATPPTVKNVKPSQPTPNAKTAKDKAPVSQLSSNSLDDLDDTRQPVTRAGHSGASTSGTKAQDPDEPATLQSSRQSMMTRSNGGRFELKDEKLVRNSEPQGSIQLDAKGKPDFSTFNTPGLAPLLDSILAPPRQTYLAHQSKDGVHGHQLLQANGHLLHLAQDDSSLALIRSSKEALHIEGKKPPAVKLEREDGNIHIDTASGRKTQELPGKAHIAHITGVLLRHDGERMRVHEDRLYQFDPLSARWKAPEGTEDIAFNSLATGGNGSVYAKSDDVVVDLTSPFMPHIEVKDLQSFSVAPDNRAALLSGKETQAILLTDMSPVIGDLTEKKT…	5145	1714
PgyICMP6373_AvrE1a_1	PgyICMP6373	AvrE	AvrE	AvrE	AvrE1	17	NA	116	GTGCATTCATCCTCGATCCACCGCAACACCGGATGCATCATTCAGCCGCCAGCCCCGGCAAACACGAACGCTGCAACTGATCTACAGCAAAAAATCGAACAACCCAAACAACGCTCCTCCCACTCACTGAGCAGTGTCGGCAAGCGAGCGCTGAAGAACGTCAGCAAACTGTTCCAGAAATCCAAGGCACCGCAGCAGAAAGCGGCCACGCCTCCCACCGTAAAAAACGTCAAGCCTTCACAGCCCACTCCAAATGCGAAGACAGCCAAAGATAAAGCGCCTGTATCTCAGTTATCGAGCAATAGTCTTGATGACCTGGACGATACGCGCCAGCCAGTAACGCGTGCGGGGCATAGCGGCGCCAGCACTTCTGGCACCAAAGCCCAAGACCCGGACGAG…	MHSSSIHRNTGCIIQPPAPANTNAATDLQQKIEQPKQRSSHSLSSVGKRALKNVSKLFQKSKAPQQKAATPPTVKNVKPSQPTPNAKTAKDKAPVSQLSSNSLDDLDDTRQPVTRAGHSGASTSGTKAQDPDEPATLQSSRQSMMTRSNGGRFELKDEKLVRNSEPQGSIQLDAKGKPDFSTFNTPGLAPLLDSILAPPRQTYLAHQSKDGVHGHQLLQANGHLLHLAQDDSSLALIRSSKEALHIEGKKPPAVKLEREDGNIHIDTASGRKTQELPGKAHIAHITGVLLRHDGERMRVHEDRLYQFDPLSARWKAPEGTEDIAFNSLATGGNGSVYAKSDDVVVDLTSPFMPHIEVKDLQSFSVAPDNRAALLSGKETQAILLTDMSPVIGDLTEKKT…	5145	1714
PgyICMP9025_AvrE1a_1	PgyICMP9025	AvrE	AvrE	AvrE	AvrE1	17	NA	116	GTGCATTCATCCTCGATCCACCGCAACACCGGATGCATCATTCAGCCGCCAGCCCCGGCAAACACGAACGCTGCAACTGATCTACAGCAAAAAATCGAACAACCCAAACAACGCTCCTCCCACTCACTGAGCAGTGTCGGCAAGCGAGCGCTGAAGAACGTCAGCAAACTGTTCCAGAAATCCAAGGCACCGCAGCAGAAAGCGGCCACGCCTCCCACCGTAAAAAACGTCAAGCCTTCACAGCCCACTCCAAATGCGAAGACAGCCAAAGATAAAGCGCCTGTATCTCAGTTATCGAGCAATAGTCTTGATGACCTGGACGATACGCGCCAGCCAGTAACGCGTGCGGGGCATAGCGGCGCCAGCACTTCTGGCACCAAAGCCCAAGACCCGGACGAG…	MHSSSIHRNTGCIIQPPAPANTNAATDLQQKIEQPKQRSSHSLSSVGKRALKNVSKLFQKSKAPQQKAATPPTVKNVKPSQPTPNAKTAKDKAPVSQLSSNSLDDLDDTRQPVTRAGHSGASTSGTKAQDPDEPATLQSSRQSMMTRSNGGRFELKDEKLVRNSEPQGSIQLDAKGKPDFSTFNTPGLAPLLDSILAPPRQTYLAHQSKDGVHGHQLLQANGHLLHLAQDDSSLALIRSSKEALHIEGKKPPAVKLEREDGNIHIDTASGRKTQELPGKAHIAHITGVLLRHDGERMRVHEDRLYQFDPLSARWKAPEGTEDIAFNSLATGGNGSVYAKSDDVVVDLTSPFMPHIEVKDLQSFSVAPDNRAALLSGKETQAILLTDMSPVIGDLTEKKT…	5145	1714
PgyLN10_AvrE1a_1	PgyLN10	AvrE	AvrE	AvrE	AvrE1	17	NA	116	GTGCATTCATCCTCGATCCACCGCAACACCGGATGCATCATTCAGCCGCCAGCCCCGGCAAACACGAACGCTGCAACTGATCTACAGCAAAAAATCGAACAACCCAAACAACGCTCCTCCCACTCACTGAGCAGTGTCGGCAAGCGAGCGCTGAAGAACGTCAGCAAACTGTTCCAGAAATCCAAGGCACCGCAGCAGAAAGCGGCCACGCCTCCCACCGTAAAAAACGTCAAGCCTTCACAGCCCACTCCAAATGCGAAGACAGCCAAAGATAAAGCGCCTGTATCTCAGTTATCGAGCAATAGTCTTGATGACCTGGACGATACGCGCCAGCCAGTAACGCGTGCGGGGCATAGCGGCGCCAGCACTTCTGGCACCAAAGCCCAAGACCCGGACGAG…	MHSSSIHRNTGCIIQPPAPANTNAATDLQQKIEQPKQRSSHSLSSVGKRALKNVSKLFQKSKAPQQKAATPPTVKNVKPSQPTPNAKTAKDKAPVSQLSSNSLDDLDDTRQPVTRAGHSGASTSGTKAQDPDEPATLQSSRQSMMTRSNGGRFELKDEKLVRNSEPQGSIQLDAKGKPDFSTFNTPGLAPLLDSILAPPRQTYLAHQSKDGVHGHQLLQANGHLLHLAQDDSSLALIRSSKEALHIEGKKPPAVKLEREDGNIHIDTASGRKTQELPGKAHIAHITGVLLRHDGERMRVHEDRLYQFDPLSARWKAPEGTEDIAFNSLATGGNGSVYAKSDDVVVDLTSPFMPHIEVKDLQSFSVAPDNRAALLSGKETQAILLTDMSPVIGDLTEKKT…	5145	1714
PgyICMP10448_AvrE1a_1	PgyICMP10448	AvrE	AvrE	AvrE	AvrE1	17	119	117	GTGGTACGCGGCGGATTCGCGGCGAACATCACCGTTAACCTGATGACCTACACCGATAACTCGTTGACCCAGAAAAACGACAAGACCAAGTTGCTCGAAGGCGGCAAGAACCGCCCGCGTTTTCTCAACAACGCAACGCTTGGCGGGCAGCTTCGCGGGCAGATCGGCGGCACCCGCACGGCCCCCACAGGCTCACCGGCCTCCGCCCCGGGACCGACGCTCGCGTCACAGTCAGCCGCCAACAATCTGGGAGTAGCGGTCAATTTCAGCGTAGAGAACAGGACTGTCAAACGGGTCAAGTTTCGCTATAACGTCGCCAAGCCGATAACCACCGAAGGTTTGGGCAAGCTGTCTAAAAGCCTCGGCGAGGCATTCAAGGACAGCACGACCAAAGCAAAA…	MVRGGFAANITVNLMTYTDNSLTQKNDKTKLLEGGKNRPRFLNNATLGGQLRGQIGGTRTAPTGSPASAPGPTLASQSAANNLGVAVNFSVENRTVKRVKFRYNVAKPITTEGLGKLSKSLGEAFKDSTTKAKLAELADPLNARYAGKKPEEVIQAHLDGLEELFADTQWQNDKQYKALRGLKRGAVEHRASVNKHSVMDNARFETSKTNLSGLSSESILTKIMGSVREASAPGNAARVAEFMRQDPKLRAMLKDMEGSIGTLARVRLEPKDSLVDKIDEGSLDGTMTQSDLSALLRDRNQMRIKRLVVFHTATQAENFTSPTPLVSYNSGANMSVTKTLGRINFIYGADQDKPIGYTFDGELSRPSASLKEAASKLKQEGFELKS	1161	386
PgyICMP2400_AvrE1a_1	PgyICMP2400	AvrE	AvrE	AvrE	AvrE1	17	119	117	GTGGTACGCGGCGGATTCGCGGCGAACATCACCGTTAACCTGATGACCTACACCGATAACTCGTTGACCCAGAAAAACGACAAGACCAAGTTGCTCGAAGGCGGCAAGAACCGCCCGCGTTTTCTCAACAACGCAACGCTTGGCGGGCAGCTTCGCGGGCAGATCGGCGGCACCCGCACGGCCCCCACAGGCTCACCGGCCTCCGCCCCGGGACCGACGCTCGCGTCACAGTCAGCCGCCAACAATCTGGGAGTAGCGGTCAATTTCAGCGTAGAGAACAGGACTGTCAAACGGGTCAAGTTTCGCTATAACGTCGCCAAGCCGATAACCACCGAAGGTTTGGGCAAGCTGTCTAAAAGCCTCGGCGAGGCATTCAAGGACAGCACGACCAAAGCAAAA…	MVRGGFAANITVNLMTYTDNSLTQKNDKTKLLEGGKNRPRFLNNATLGGQLRGQIGGTRTAPTGSPASAPGPTLASQSAANNLGVAVNFSVENRTVKRVKFRYNVAKPITTEGLGKLSKSLGEAFKDSTTKAKLAELADPLNARYAGKKPEEVIQAHLDGLEELFADTQWQNDKQYKALRGLKRGAVEHRASVNKHSVMDNARFETSKTNLSGLSSESILTKIMGSVREASAPGNAARVAEFMRQDPKLRAMLKDMEGSIGTLARVRLEPKDSLVDKIDEGSLDGTMTQSDLSALLRDRNQMRIKRLVVFHTATQAENFTSPTPLVSYNSGANMSVTKTLGRINFIYGADQDKPIGYTFDGELSRPSASLKEAASKLKQEGFELKS	1161	386
PgyKN44_AvrE1a_1	PgyKN44	AvrE	AvrE	AvrE	AvrE1	17	119	117	GTGGTACGCGGCGGATTCGCGGCGAACATCACCGTTAACCTGATGACCTACACCGATAACTCGTTGACCCAGAAAAACGACAAGACCAAGTTGCTCGAAGGCGGCAAGAACCGCCCGCGTTTTCTCAACAACGCAACGCTTGGCGGGCAGCTTCGCGGGCAGATCGGCGGCACCCGCACGGCCCCCACAGGCTCACCGGCCTCCGCCCCGGGACCGACGCTCGCGTCACAGTCAGCCGCCAACAATCTGGGAGTAGCGGTCAATTTCAGCGTAGAGAACAGGACTGTCAAACGGGTCAAGTTTCGCTATAACGTCGCCAAGCCGATAACCACCGAAGGTTTGGGCAAGCTGTCTAAAAGCCTCGGCGAGGCATTCAAGGACAGCACGACCAAAGCAAAA…	MVRGGFAANITVNLMTYTDNSLTQKNDKTKLLEGGKNRPRFLNNATLGGQLRGQIGGTRTAPTGSPASAPGPTLASQSAANNLGVAVNFSVENRTVKRVKFRYNVAKPITTEGLGKLSKSLGEAFKDSTTKAKLAELADPLNARYAGKKPEEVIQAHLDGLEELFADTQWQNDKQYKALRGLKRGAVEHRASVNKHSVMDNARFETSKTNLSGLSSESILTKIMGSVREASAPGNAARVAEFMRQDPKLRAMLKDMEGSIGTLARVRLEPKDSLVDKIDEGSLDGTMTQSDLSALLRDRNQMRIKRLVVFHTATQAENFTSPTPLVSYNSGANMSVTKTLGRINFIYGADQDKPIGYTFDGELSRPSASLKEAASKLKQEGFELKS	1161	386
PgyUnB647_AvrE1a_1	PgyUnB647	AvrE	AvrE	AvrE	AvrE1	17	119	117	GTGGTACGCGGCGGATTCGCGGCGAACATCACCGTTAACCTGATGACCTACACCGATAACTCGTTGACCCAGAAAAACGACAAGACCAAGTTGCTCGAAGGCGGCAAGAACCGCCCGCGTTTTCTCAACAACGCAACGCTTGGCGGGCAGCTTCGCGGGCAGATCGGCGGCACCCGCACGGCCCCCACAGGCTCACCGGCCTCCGCCCCGGGACCGACGCTCGCGTCACAGTCAGCCGCCAACAATCTGGGAGTAGCGGTCAATTTCAGCGTAGAGAACAGGACTGTCAAACGGGTCAAGTTTCGCTATAACGTCGCCAAGCCGATAACCACCGAAGGTTTGGGCAAGCTGTCTAAAAGCCTCGGCGAGGCATTCAAGGACAGCACGACCAAAGCAAAA…	MVRGGFAANITVNLMTYTDNSLTQKNDKTKLLEGGKNRPRFLNNATLGGQLRGQIGGTRTAPTGSPASAPGPTLASQSAANNLGVAVNFSVENRTVKRVKFRYNVAKPITTEGLGKLSKSLGEAFKDSTTKAKLAELADPLNARYAGKKPEEVIQAHLDGLEELFADTQWQNDKQYKALRGLKRGAVEHRASVNKHSVMDNARFETSKTNLSGLSSESILTKIMGSVREASAPGNAARVAEFMRQDPKLRAMLKDMEGSIGTLARVRLEPKDSLVDKIDEGSLDGTMTQSDLSALLRDRNQMRIKRLVVFHTATQAENFTSPTPLVSYNSGANMSVTKTLGRINFIYGADQDKPIGYTFDGELSRPSASLKEAASKLKQEGFELKS	1161	386
PgyICMP10449_AvrE1a_1	PgyICMP10449	AvrE	AvrE	AvrE	AvrE1	17	NA	118	GTGACTTACGGCGAAAACCCGGTCAAGGTGGTTACAGACATGGGCTTTACCGATAACAAAGCGCTGGAAAGCGGTTATGAAGCGGTCAAGACATTCCTCAAATCGTTCAAAAAAGCTGACCATGCGGTGAGCGTCAACATGCGCGCAGCCACAGGCAGCAAGGACCAGGCGGAGCTGGCCGGGAAATTCAAAAGCATGCTCAAGCAACTGGAGCATGGCGACGACGAAATTAGGCTGCAACGCAGTTACGGACTGAACCTTACCACCCCGTTCATCATTCTTGCCGACAACGCCACAGGACTATGGCCAACGGCAGGCACCACCGGCAACCGTAACTACATACTCAATGCCGAGCGTTGCGAGGGCGGCGTTACCCTGTACCTGATCAGCGAAGGTGCG…	MTYGENPVKVVTDMGFTDNKALESGYEAVKTFLKSFKKADHAVSVNMRAATGSKDQAELAGKFKSMLKQLEHGDDEIRLQRSYGLNLTTPFIILADNATGLWPTAGTTGNRNYILNAERCEGGVTLYLISEGAGNVSGGFGAGKDYWPGFFDENHPARSVDVGNNRTLTPNFRLGVDVTATVAASQRAGVVFNVPDEDIDAFIDDLFEGKLNPLQVLKKAVDHETYQARRFNFDLTAGGTADLRAGINLTEDRDPDADPNSDSFSAVVRGGFAANITVNLMTYTDNSLTQKNDKTKLLEGGKNRPRFLNNATLGGQLRGQIGGTRTAPTGSPASAPGPTLASQSAANNLGVAVNFSVENRTVKRVKFRYNVAKPITTEGLGKLSKSLGEAFKDSTTKAK…	1959	652
PgyICMP10451_AvrE1a_1	PgyICMP10451	AvrE	AvrE	AvrE	AvrE1	17	NA	118	GTGACTTACGGCGAAAACCCGGTCAAGGTGGTTACAGACATGGGCTTTACCGATAACAAAGCGCTGGAAAGCGGTTATGAAGCGGTCAAGACATTCCTCAAATCGTTCAAAAAAGCTGACCATGCGGTGAGCGTCAACATGCGCGCAGCCACAGGCAGCAAGGACCAGGCGGAGCTGGCCGGGAAATTCAAAAGCATGCTCAAGCAACTGGAGCATGGCGACGACGAAATTAGGCTGCAACGCAGTTACGGACTGAACCTTACCACCCCGTTCATCATTCTTGCCGACAACGCCACAGGACTATGGCCAACGGCAGGCACCACCGGCAACCGTAACTACATACTCAATGCCGAGCGTTGCGAGGGCGGCGTTACCCTGTACCTGATCAGCGAAGGTGCG…	MTYGENPVKVVTDMGFTDNKALESGYEAVKTFLKSFKKADHAVSVNMRAATGSKDQAELAGKFKSMLKQLEHGDDEIRLQRSYGLNLTTPFIILADNATGLWPTAGTTGNRNYILNAERCEGGVTLYLISEGAGNVSGGFGAGKDYWPGFFDENHPARSVDVGNNRTLTPNFRLGVDVTATVAASQRAGVVFNVPDEDIDAFIDDLFEGKLNPLQVLKKAVDHETYQARRFNFDLTAGGTADLRAGINLTEDRDPDADPNSDSFSAVVRGGFAANITVNLMTYTDNSLTQKNDKTKLLEGGKNRPRFLNNATLGGQLRGQIGGTRTAPTGSPASAPGPTLASQSAANNLGVAVNFSVENRTVKRVKFRYNVAKPITTEGLGKLSKSLGEAFKDSTTKAK…	1959	652
PgyICMP3482_AvrE1a_1	PgyICMP3482	AvrE	AvrE	AvrE	AvrE1	17	NA	118	GTGACTTACGGCGAAAACCCGGTCAAGGTGGTTACAGACATGGGCTTTACCGATAACAAAGCGCTGGAAAGCGGTTATGAAGCGGTCAAGACATTCCTCAAATCGTTCAAAAAAGCTGACCATGCGGTGAGCGTCAACATGCGCGCAGCCACAGGCAGCAAGGACCAGGCGGAGCTGGCCGGGAAATTCAAAAGCATGCTCAAGCAACTGGAGCATGGCGACGACGAAATTAGGCTGCAACGCAGTTACGGACTGAACCTTACCACCCCGTTCATCATTCTTGCCGACAACGCCACAGGACTATGGCCAACGGCAGGCACCACCGGCAACCGTAACTACATACTCAATGCCGAGCGTTGCGAGGGCGGCGTTACCCTGTACCTGATCAGCGAAGGTGCG…	MTYGENPVKVVTDMGFTDNKALESGYEAVKTFLKSFKKADHAVSVNMRAATGSKDQAELAGKFKSMLKQLEHGDDEIRLQRSYGLNLTTPFIILADNATGLWPTAGTTGNRNYILNAERCEGGVTLYLISEGAGNVSGGFGAGKDYWPGFFDENHPARSVDVGNNRTLTPNFRLGVDVTATVAASQRAGVVFNVPDEDIDAFIDDLFEGKLNPLQVLKKAVDHETYQARRFNFDLTAGGTADLRAGINLTEDRDPDADPNSDSFSAVVRGGFAANITVNLMTYTDNSLTQKNDKTKLLEGGKNRPRFLNNATLGGQLRGQIGGTRTAPTGSPASAPGPTLASQSAANNLGVAVNFSVENRTVKRVKFRYNVAKPITTEGLGKLSKSLGEAFKDSTTKAK…	1959	652
PgyICMP4630_AvrE1a_1	PgyICMP4630	AvrE	AvrE	AvrE	AvrE1	17	NA	118	GTGACTTACGGCGAAAACCCGGTCAAGGTGGTTACAGACATGGGCTTTACCGATAACAAAGCGCTGGAAAGCGGTTATGAAGCGGTCAAGACATTCCTCAAATCGTTCAAAAAAGCTGACCATGCGGTGAGCGTCAACATGCGCGCAGCCACAGGCAGCAAGGACCAGGCGGAGCTGGCCGGGAAATTCAAAAGCATGCTCAAGCAACTGGAGCATGGCGACGACGAAATTAGGCTGCAACGCAGTTACGGACTGAACCTTACCACCCCGTTCATCATTCTTGCCGACAACGCCACAGGACTATGGCCAACGGCAGGCACCACCGGCAACCGTAACTACATACTCAATGCCGAGCGTTGCGAGGGCGGCGTTACCCTGTACCTGATCAGCGAAGGTGCG…	MTYGENPVKVVTDMGFTDNKALESGYEAVKTFLKSFKKADHAVSVNMRAATGSKDQAELAGKFKSMLKQLEHGDDEIRLQRSYGLNLTTPFIILADNATGLWPTAGTTGNRNYILNAERCEGGVTLYLISEGAGNVSGGFGAGKDYWPGFFDENHPARSVDVGNNRTLTPNFRLGVDVTATVAASQRAGVVFNVPDEDIDAFIDDLFEGKLNPLQVLKKAVDHETYQARRFNFDLTAGGTADLRAGINLTEDRDPDADPNSDSFSAVVRGGFAANITVNLMTYTDNSLTQKNDKTKLLEGGKNRPRFLNNATLGGQLRGQIGGTRTAPTGSPASAPGPTLASQSAANNLGVAVNFSVENRTVKRVKFRYNVAKPITTEGLGKLSKSLGEAFKDSTTKAK…	1959	652
PgyICMP4966_AvrE1a_1	PgyICMP4966	AvrE	AvrE	AvrE	AvrE1	17	NA	118	GTGACTTACGGCGAAAACCCGGTCAAGGTGGTTACAGACATGGGCTTTACCGATAACAAAGCGCTGGAAAGCGGTTATGAAGCGGTCAAGACATTCCTCAAATCGTTCAAAAAAGCTGACCATGCGGTGAGCGTCAACATGCGCGCAGCCACAGGCAGCAAGGACCAGGCGGAGCTGGCCGGGAAATTCAAAAGCATGCTCAAGCAACTGGAGCATGGCGACGACGAAATTAGGCTGCAACGCAGTTACGGACTGAACCTTACCACCCCGTTCATCATTCTTGCCGACAACGCCACAGGACTATGGCCAACGGCAGGCACCACCGGCAACCGTAACTACATACTCAATGCCGAGCGTTGCGAGGGCGGCGTTACCCTGTACCTGATCAGCGAAGGTGCG…	MTYGENPVKVVTDMGFTDNKALESGYEAVKTFLKSFKKADHAVSVNMRAATGSKDQAELAGKFKSMLKQLEHGDDEIRLQRSYGLNLTTPFIILADNATGLWPTAGTTGNRNYILNAERCEGGVTLYLISEGAGNVSGGFGAGKDYWPGFFDENHPARSVDVGNNRTLTPNFRLGVDVTATVAASQRAGVVFNVPDEDIDAFIDDLFEGKLNPLQVLKKAVDHETYQARRFNFDLTAGGTADLRAGINLTEDRDPDADPNSDSFSAVVRGGFAANITVNLMTYTDNSLTQKNDKTKLLEGGKNRPRFLNNATLGGQLRGQIGGTRTAPTGSPASAPGPTLASQSAANNLGVAVNFSVENRTVKRVKFRYNVAKPITTEGLGKLSKSLGEAFKDSTTKAK…	1959	652
PgyICMP4324_AvrE1a_1	PgyICMP4324	AvrE	AvrE	AvrE	AvrE1	17	NA	119	GTGCATTCATCCTCGATCCACCGCAACACCGGATGCATCATTCAGCCGCCAGCCCCGGCAAACACGAACGCTGCAACTGATCTACAGCAAAAAATCGAACAACCCAAACAACGCTCCTCCCACTCACTGAGCAGTGTCGGCAAGCGAGCGCTGAAGAACGTCAGCAAACTGTTCCAGAAATCCAAGGCACCGCAGCAGAAAGCGGCCACGCCTCCCACCGTAAAAAACGTCAAGCCTTCACAGCCCACTCCAAATGCGAAGACAGCCAAAGATAAAGCGCCTGTATCTCAGTTATCGAGCAATAGTCTTGATGACCTGGACGATACGCGCCAGCCAGTAACGCGTGCGGGGCATAGCGGCGCCAGCACTTGTGGCACCAAAGCCCAAGACCCGGACGAG…	MHSSSIHRNTGCIIQPPAPANTNAATDLQQKIEQPKQRSSHSLSSVGKRALKNVSKLFQKSKAPQQKAATPPTVKNVKPSQPTPNAKTAKDKAPVSQLSSNSLDDLDDTRQPVTRAGHSGASTCGTKAQDPDEPATLQSSRQSMMTRSNGGRFELKDEKLVRNSEPQGSIQLDAKGKPDFSTFNTPGLAPLLDSILATPRQTYLAHQSKDGVHGHQLLQANGHLLHLAQDDSSLALIRSSKEALHIEGKKPPAVKLEREDGNIHIDTASGRKTQELPGKAHIAHITGVLLRHDGERMRVHEDRLYQFDPLSARWKAPEGTEDIAFNSLATGGKGSVYAKSDDVVVDLTSPFMPHIEVKDLQSFSVAPDNRAALLSGKETQAILLTDMSPVIGDLTEKKT…	5145	1714
PgyICMP9923_AvrE1a_1	PgyICMP9923	AvrE	AvrE	AvrE	AvrE1	17	NA	119	GTGCATTCATCCTCGATCCACCGCAACACCGGATGCATCATTCAGCCGCCAGCCCCGGCAAACACGAACGCTGCAACTGATCTACAGCAAAAAATCGAACAACCCAAACAACGCTCCTCCCACTCACTGAGCAGTGTCGGCAAGCGAGCGCTGAAGAACGTCAGCAAACTGTTCCAGAAATCCAAGGCACCGCAGCAGAAAGCGGCCACGCCTCCCACCGTAAAAAACGTCAAGCCTTCACAGCCCACTCCAAATGCGAAGACAGCCAAAGATAAAGCGCCTGTATCTCAGTTATCGAGCAATAGTCTTGATGACCTGGACGATACGCGCCAGCCAGTAACGCGTGCGGGGCATAGCGGCGCCAGCACTTGTGGCACCAAAGCCCAAGACCCGGACGAG…	MHSSSIHRNTGCIIQPPAPANTNAATDLQQKIEQPKQRSSHSLSSVGKRALKNVSKLFQKSKAPQQKAATPPTVKNVKPSQPTPNAKTAKDKAPVSQLSSNSLDDLDDTRQPVTRAGHSGASTCGTKAQDPDEPATLQSSRQSMMTRSNGGRFELKDEKLVRNSEPQGSIQLDAKGKPDFSTFNTPGLAPLLDSILATPRQTYLAHQSKDGVHGHQLLQANGHLLHLAQDDSSLALIRSSKEALHIEGKKPPAVKLEREDGNIHIDTASGRKTQELPGKAHIAHITGVLLRHDGERMRVHEDRLYQFDPLSARWKAPEGTEDIAFNSLATGGKGSVYAKSDDVVVDLTSPFMPHIEVKDLQSFSVAPDNRAALLSGKETQAILLTDMSPVIGDLTEKKT…	5145	1714
PmaKN91_AvrE1a_1	PmaKN91	AvrE	AvrE	AvrE	AvrE1	17	NA	119	GTGCATTCATCCTCGATCCACCGCAACACCGGATGCATCATTCAGCCGCCAGCCCCGGCAAACACGAACGCTGCAACTGATCTACAGCAAAAAATCGAACAACCCAAACAACGCTCCTCCCACTCACTGAGCAGTGTCGGCAAGCGAGCGCTGAAGAACGTCAGCAAACTGTTCCAGAAATCCAAGGCACCGCAGCAGAAAGCGGCCACGCCTCCCACCGTAAAAAACGTCAAGCCTTCACAGCCCACTCCAAATGCGAAGACAGCCAAAGATAAAGCGCCTGTATCTCAGTTATCGAGCAATAGTCTTGATGACCTGGACGATACGCGCCAGCCAGTAACGCGTGCGGGGCATAGCGGCGCCAGCACTTGTGGCACCAAAGCCCAAGACCCGGACGAG…	MHSSSIHRNTGCIIQPPAPANTNAATDLQQKIEQPKQRSSHSLSSVGKRALKNVSKLFQKSKAPQQKAATPPTVKNVKPSQPTPNAKTAKDKAPVSQLSSNSLDDLDDTRQPVTRAGHSGASTCGTKAQDPDEPATLQSSRQSMMTRSNGGRFELKDEKLVRNSEPQGSIQLDAKGKPDFSTFNTPGLAPLLDSILATPRQTYLAHQSKDGVHGHQLLQANGHLLHLAQDDSSLALIRSSKEALHIEGKKPPAVKLEREDGNIHIDTASGRKTQELPGKAHIAHITGVLLRHDGERMRVHEDRLYQFDPLSARWKAPEGTEDIAFNSLATGGKGSVYAKSDDVVVDLTSPFMPHIEVKDLQSFSVAPDNRAALLSGKETQAILLTDMSPVIGDLTEKKT…	5145	1714
PgyICMP4332_AvrE1a_1	PgyICMP4332	AvrE	AvrE	AvrE	AvrE1	17	NA	120	GTGACTTACGGCGAAAACCCGGTCAAGGTGGTTACAGACATGGGCTTTACCGATAACAAAGCGCTGGAAAGCGGTTATGAAGCGGTCAAGACATTCCTCAAATCGTTCAAAAAAGCTGACCATGCGGTGAGCGTCAACATGCGCGCAGCCACAGGCAGCAAGGACCAGGCGGAGCTGGCCGGGAAATTCAAAAGCATGCTCAAGCAACTGGAGCATGGCGACGACGAAATTAGGCTGCAACGCAGTTACGGACTGAACCTTACCACCCCGTTCATCATTCTTGCCGACAACGCCACAGGACTATGGCCAACGGCAGGCACCACCGGCAACCGTAACTACATACTCAATGCCGAGCGTTGCGAGGGCGGCGTTACCCTGTACCTGATCAGCGAAGGTGCG…	MTYGENPVKVVTDMGFTDNKALESGYEAVKTFLKSFKKADHAVSVNMRAATGSKDQAELAGKFKSMLKQLEHGDDEIRLQRSYGLNLTTPFIILADNATGLWPTAGTTGNRNYILNAERCEGGVTLYLISEGAGNVSGGFGAGKDYWPGFFDENHPARSVDVGNNRTLTPNFRLGVDVTATVAASQRAGVVFNVPDEDIDAFIDDLFEGKLNPLQVLKKAVDHETYQARRFNFDLTAGGTADLRAGINLTEDRDPDADPNSDSFSAVVRGGFAANITVNLMTYTDNSLTQKNDKTKLREGGKNRPRFLNNATLGGQLRGQIGGTRTAPTGTPASAPGPTLASQSAANNLGVAVNFSVENRTVKRVKFRYNVAKPITTEGLGKLSKSLGEAFKDSTTKAK…	1959	652
Psy0518_AvrE1a_2	Psy0518	AvrE	AvrE	AvrE	AvrE1	17	NA	120	GTGACTTACGGCGAAAACCCGGTCAAGGTGGTTACAGACATGGGCTTTACCGATAACAAAGCGCTGGAAAGCGGTTATGAAGCGGTCAAGACATTCCTCAAATCGTTCAAAAAAGCTGACCATGCGGTGAGCGTCAACATGCGCGCAGCCACAGGCAGCAAGGACCAGGCGGAGCTGGCCGGGAAATTCAAAAGCATGCTCAAGCAACTGGAGCATGGCGACGACGAAATTAGGCTGCAACGCAGTTACGGACTGAACCTTACCACCCCGTTCATCATTCTTGCCGACAACGCCACAGGACTATGGCCAACGGCAGGCACCACCGGCAACCGTAACTACATACTCAATGCCGAGCGTTGCGAGGGCGGCGTTACCCTGTACCTGATCAGCGAAGGTGCG…	MTYGENPVKVVTDMGFTDNKALESGYEAVKTFLKSFKKADHAVSVNMRAATGSKDQAELAGKFKSMLKQLEHGDDEIRLQRSYGLNLTTPFIILADNATGLWPTAGTTGNRNYILNAERCEGGVTLYLISEGAGNVSGGFGAGKDYWPGFFDENHPARSVDVGNNRTLTPNFRLGVDVTATVAASQRAGVVFNVPDEDIDAFIDDLFEGKLNPLQVLKKAVDHETYQARRFNFDLTAGGTADLRAGINLTEDRDPDADPNSDSFSAVVRGGFAANITVNLMTYTDNSLTQKNDKTKLREGGKNRPRFLNNATLGGQLRGQIGGTRTAPTGTPASAPGPTLASQSAANNLGVAVNFSVENRTVKRVKFRYNVAKPITTEGLGKLSKSLGEAFKDSTTKAK…	1959	652
Psy0531_AvrE1a_2	Psy0531	AvrE	AvrE	AvrE	AvrE1	17	NA	120	GTGACTTACGGCGAAAACCCGGTCAAGGTGGTTACAGACATGGGCTTTACCGATAACAAAGCGCTGGAAAGCGGTTATGAAGCGGTCAAGACATTCCTCAAATCGTTCAAAAAAGCTGACCATGCGGTGAGCGTCAACATGCGCGCAGCCACAGGCAGCAAGGACCAGGCGGAGCTGGCCGGGAAATTCAAAAGCATGCTCAAGCAACTGGAGCATGGCGACGACGAAATTAGGCTGCAACGCAGTTACGGACTGAACCTTACCACCCCGTTCATCATTCTTGCCGACAACGCCACAGGACTATGGCCAACGGCAGGCACCACCGGCAACCGTAACTACATACTCAATGCCGAGCGTTGCGAGGGCGGCGTTACCCTGTACCTGATCAGCGAAGGTGCG…	MTYGENPVKVVTDMGFTDNKALESGYEAVKTFLKSFKKADHAVSVNMRAATGSKDQAELAGKFKSMLKQLEHGDDEIRLQRSYGLNLTTPFIILADNATGLWPTAGTTGNRNYILNAERCEGGVTLYLISEGAGNVSGGFGAGKDYWPGFFDENHPARSVDVGNNRTLTPNFRLGVDVTATVAASQRAGVVFNVPDEDIDAFIDDLFEGKLNPLQVLKKAVDHETYQARRFNFDLTAGGTADLRAGINLTEDRDPDADPNSDSFSAVVRGGFAANITVNLMTYTDNSLTQKNDKTKLREGGKNRPRFLNNATLGGQLRGQIGGTRTAPTGTPASAPGPTLASQSAANNLGVAVNFSVENRTVKRVKFRYNVAKPITTEGLGKLSKSLGEAFKDSTTKAK…	1959	652
Psy0532_AvrE1a_1	Psy0532	AvrE	AvrE	AvrE	AvrE1	17	NA	120	GTGACTTACGGCGAAAACCCGGTCAAGGTGGTTACAGACATGGGCTTTACCGATAACAAAGCGCTGGAAAGCGGTTATGAAGCGGTCAAGACATTCCTCAAATCGTTCAAAAAAGCTGACCATGCGGTGAGCGTCAACATGCGCGCAGCCACAGGCAGCAAGGACCAGGCGGAGCTGGCCGGGAAATTCAAAAGCATGCTCAAGCAACTGGAGCATGGCGACGACGAAATTAGGCTGCAACGCAGTTACGGACTGAACCTTACCACCCCGTTCATCATTCTTGCCGACAACGCCACAGGACTATGGCCAACGGCAGGCACCACCGGCAACCGTAACTACATACTCAATGCCGAGCGTTGCGAGGGCGGCGTTACCCTGTACCTGATCAGCGAAGGTGCG…	MTYGENPVKVVTDMGFTDNKALESGYEAVKTFLKSFKKADHAVSVNMRAATGSKDQAELAGKFKSMLKQLEHGDDEIRLQRSYGLNLTTPFIILADNATGLWPTAGTTGNRNYILNAERCEGGVTLYLISEGAGNVSGGFGAGKDYWPGFFDENHPARSVDVGNNRTLTPNFRLGVDVTATVAASQRAGVVFNVPDEDIDAFIDDLFEGKLNPLQVLKKAVDHETYQARRFNFDLTAGGTADLRAGINLTEDRDPDADPNSDSFSAVVRGGFAANITVNLMTYTDNSLTQKNDKTKLREGGKNRPRFLNNATLGGQLRGQIGGTRTAPTGTPASAPGPTLASQSAANNLGVAVNFSVENRTVKRVKFRYNVAKPITTEGLGKLSKSLGEAFKDSTTKAK…	1959	652
PgyICMP4332_AvrE1a_2	PgyICMP4332	AvrE	AvrE	AvrE	AvrE1	17	NA	121	GTGCATTCATCCTCGATCCACCGCAACACCGGATGCATCATTCAGCCGCCAGCCCCGGCAAACACGAACGCTGCAACTGATCTACAGCAAAAAATCGAACAACCCAAACAACGCTCCTCCCACTCACTGAGCAGTGTCGGCAAGCGAGCGCTGAAGAACGTCAGCAAACTGTTCCAGAAATCCAAGGCACCGCAGCAGAAAGCGGCCACGCCTCCCACCGTAAAAAACGTCAAGCCTTCACAGCCCACTCCAAATGCGAAGACAGCCAAAGATAAAGCGCCTGTATCTCAGTTATCGAGCAATAGTCTTGATGACCTGGACGATACGCGCCAGCCAGTAACGCGTGCGGGGCATAGCGGCGCCAGCACTTGTGGCACCAAAGCCCAAGACCCGGACGAG…	MHSSSIHRNTGCIIQPPAPANTNAATDLQQKIEQPKQRSSHSLSSVGKRALKNVSKLFQKSKAPQQKAATPPTVKNVKPSQPTPNAKTAKDKAPVSQLSSNSLDDLDDTRQPVTRAGHSGASTCGTKAQDPDEPATLQSSRQSMMTRSNGGRFELKDEKLVRNSEPQGSIQLDAKGKPDFSTFNTPGLAPLLDSILATPRQTYLAHQSKDGVHGHQLLQANGHLLHLAQDDSSLALIRSSKEALHIEGKKPPAVKLEREDGNIHIDTASGRKTQELPGKAHIAHITGVLLRHDGERMRVHEDRLYQFDPLSARWKAPEGTEDIAFNSLATGGKGSVYAKSDDVVVDLTSPFMPHIEVKDLQSFSVAPDNRAALLSGKETQAILLTDMSPVIGDLTEKKT…	3159	1052
PgyICMP4333_AvrE1a_1	PgyICMP4333	AvrE	AvrE	AvrE	AvrE1	17	NA	122	ATGCGTGTGCATGAAGACCGGCTCTATCAGTTCGACCCGCTCAGTGCTCGCTGGAAAGCGCCTGAAGGCACGGAGGACATTGCTTTCAATAGTCTGGCCACAGGCGGCAAGGGCTCGGTCTATGCGAAAAGCGACGATGTGGTAGTCGACCTCACGAGCCCTTTCATGCCGCACATCGAAGTCAAGGATCTGCAGTCATTTTCGGTGGCACCGGACAACAGAGCGGCATTGCTCAGCGGCAAGGAGACTCAGGCGATCCTGCTCACAGACATGAGCCCGGTGATTGGCGATCTGACCGAGAAGAAAACCAAAGCGCTTGAACTCGACGGCGGCAAGGCGCAGGCGGCTGCGGTCGGCCTGAGCGACAACAAGCTGTTCATAGCAGACACCCAAGGCAGA…	MRVHEDRLYQFDPLSARWKAPEGTEDIAFNSLATGGKGSVYAKSDDVVVDLTSPFMPHIEVKDLQSFSVAPDNRAALLSGKETQAILLTDMSPVIGDLTEKKTKALELDGGKAQAAAVGLSDNKLFIADTQGRLYSADRSAFESNDPQLKLMPDQANFQLAGLPLGGHDSVTGFINGDDGRVHALIKNRQGEIHSHALNEQDSKLESGWNLTNALVLSNNRGLTMPPAPTAADRLNLDRAGLVGLSEGRIQRWDATPECWKDAGIKDIDRLQRGADSNAYVLKGGKLHALKVTPEHPNMAFDHNTALAQTARSTTVEMGKEIEGLDDRVITAFAMVSNKRFVALDDQNKLTAHSKDHKPVTLDIPGLEGDIKSLALDEKHNLHALTSTGGLYCLPREAW…	4257	1418
PgyICMP5027_AvrE1a_1	PgyICMP5027	AvrE	AvrE	AvrE	AvrE1	17	NA	123	GTGCATTCATCCTCGATCCACCGCAACACCGGATGCATCATTCAGCCGCCAGCCCCGGCAAACACGAACGCTGCAACTGATCTACAGCAAAAAATCGAACAACCCAAACAACGCTCCTCCCACTCACTGAGCAGTGTCGGCAAGCGAGCGCTGAAGAACGTCAGCAAACTGTTCCAGAAATCCAAGGCACCGCAGCAGAAAGCGGCCACGCCTCCCACCGTAAAAAACGTCAAGCCTTCACAGCCCACTCCAAATGCGAAGACAGCCAAAGATAAAGCGCCTGTATCTCAGTTATCGAGCAATAGTCTTGATGACCTGGACGATACGCGCCAGCCAGTAACGCGTGCGGGGCATAGCGGCGCCAGCACTTCTGGCACCAAAGCCCAAGACCCGGACGAG…	MHSSSIHRNTGCIIQPPAPANTNAATDLQQKIEQPKQRSSHSLSSVGKRALKNVSKLFQKSKAPQQKAATPPTVKNVKPSQPTPNAKTAKDKAPVSQLSSNSLDDLDDTRQPVTRAGHSGASTSGTKAQDPDEPATLQSSRQSMMTRSNGGRFELKDEKLVRNSEPQGSIQLDAKGKPDFSTFNTPGLAPLLDSILAPPRQTYLAHQSKDGVHGHQLLQANGHLLHLAQDDSSLALIRSSKEALHIEGKKPPAVKLEREDGNIHIDTASGRKTQELPGKAHIAHITGVLLRHDGERMRVHEDRLYQFDPLSARWKAPEGTEDIAFNSLATGGNGSVYAKSDDVVVDLTSPFMPHIEVKDLQSFSVAPDNRAALLSGKETQAILLTDMSPVIGDLTEKKT…	5145	1714
PgyICMP7082_AvrE1a_1	PgyICMP7082	AvrE	AvrE	AvrE	AvrE1	17	NA	123	GTGCATTCATCCTCGATCCACCGCAACACCGGATGCATCATTCAGCCGCCAGCCCCGGCAAACACGAACGCTGCAACTGATCTACAGCAAAAAATCGAACAACCCAAACAACGCTCCTCCCACTCACTGAGCAGTGTCGGCAAGCGAGCGCTGAAGAACGTCAGCAAACTGTTCCAGAAATCCAAGGCACCGCAGCAGAAAGCGGCCACGCCTCCCACCGTAAAAAACGTCAAGCCTTCACAGCCCACTCCAAATGCGAAGACAGCCAAAGATAAAGCGCCTGTATCTCAGTTATCGAGCAATAGTCTTGATGACCTGGACGATACGCGCCAGCCAGTAACGCGTGCGGGGCATAGCGGCGCCAGCACTTCTGGCACCAAAGCCCAAGACCCGGACGAG…	MHSSSIHRNTGCIIQPPAPANTNAATDLQQKIEQPKQRSSHSLSSVGKRALKNVSKLFQKSKAPQQKAATPPTVKNVKPSQPTPNAKTAKDKAPVSQLSSNSLDDLDDTRQPVTRAGHSGASTSGTKAQDPDEPATLQSSRQSMMTRSNGGRFELKDEKLVRNSEPQGSIQLDAKGKPDFSTFNTPGLAPLLDSILAPPRQTYLAHQSKDGVHGHQLLQANGHLLHLAQDDSSLALIRSSKEALHIEGKKPPAVKLEREDGNIHIDTASGRKTQELPGKAHIAHITGVLLRHDGERMRVHEDRLYQFDPLSARWKAPEGTEDIAFNSLATGGNGSVYAKSDDVVVDLTSPFMPHIEVKDLQSFSVAPDNRAALLSGKETQAILLTDMSPVIGDLTEKKT…	5145	1714
PgyICMP807_AvrE1a_1	PgyICMP807	AvrE	AvrE	AvrE	AvrE1	17	NA	124	GTGCATTCATCCTCGATCCACCGCAACACCGGATGCATCATTCAGCCGCCAGCCCCGGCAAACACGAACGCTGCAACTGATCTACAGCAAAAAATCGAACAACCCAAACAACGCTCCTCCCACTCACTGAGCAGTGTCGGCAAGCGAGCGCTGAAGAACGTCAGCAAACTGTTCCAGAAATCCAAGGCACCGCAGCAGAAAGCGGCCACGCCTCCCACCGTAAAAAACGTCAAGCCTTCACAGCCCACTCCAAATGCGAAGACAGCCAAAGATAAAGCGCCTGTATCTCAGTTATCGAGCAATAGTCTTGATGACCTGGACGATACGCGCCAGCCAGTAACGCGTGCGGGGCATAGCGGCGCCAGCACTTCTGGCACCAAAGCCCAAGACCCGGACGAG…	MHSSSIHRNTGCIIQPPAPANTNAATDLQQKIEQPKQRSSHSLSSVGKRALKNVSKLFQKSKAPQQKAATPPTVKNVKPSQPTPNAKTAKDKAPVSQLSSNSLDDLDDTRQPVTRAGHSGASTSGTKAQDPDEPATLQSSRQSMMTRSNGGRFELKDEKLVRNSEPQGSIQLDAKGKPDFSTFNTPGLAPLLDSILATPRQTYLAHQSKDGVHGHQLLQANGHLLHLAQDDSSLALIRSSKEALHIEGKKPPAVKLEREDGNIHIDTASGRKTQELPGKAHIAHITGVLLRHDGERMRVHEDRLYQFDPLSARWKAPEGTEDIAFNSLATGGNGSVYAKSDDVVVDLTSPFMPHIEVKDLQSFSVAPDNRAALLSGKETQAILLTDMSPVIGDLTEKKT…	5145	1714
PgyICMP867_AvrE1a_1	PgyICMP867	AvrE	AvrE	AvrE	AvrE1	17	NA	125	GTGCATTCATCCTCGATCCACCGCAACACCGGATGCATCATTCAGCCGCCAGCCCCGGCAAACACCAACGCTGCAACTGATCTACAGCAAAAAATCGAACAACCCAAACAACGCTCCTCCCACTCACTGAGCAGTGTCGGCAAGCGAGCGCTGAAGAACGTCAGCAAACTGTTCCAGAAATCCAAGGCACCGCAGCAGAAAGCGGCCACGCCTCCCACCGTAAAAAACGTCAAGCCTTCACAGCCCACTCCAAATGCGAAGACAGCCAAAGATAAAGCGCCTGTATCTCAGTTATCGAGCAATAGTCTTGATGACCTGGACGATACGCGCCAGCCAGTAACGCGTGCGGGGCATAGCGGCGCCAGCACTTCTGGCACCAAAGCCCAAGACCCGGACGAG…	MHSSSIHRNTGCIIQPPAPANTNAATDLQQKIEQPKQRSSHSLSSVGKRALKNVSKLFQKSKAPQQKAATPPTVKNVKPSQPTPNAKTAKDKAPVSQLSSNSLDDLDDTRQPVTRAGHSGASTSGTKAQDPDEPATLQSSRQSMMTRSNGGRFELKDEKLVRNSEPQGSIQLDAKGKPDFSTFNTPGLAPLLDSILATPRQTYLAHQSKDGVHGHQLLQANGHLLHLAQDDSSLALIRSSKEALHIEGKKPPAVKLEREDGNIHIDTASGRKTQELPGKAHIAHITGVLLRHDGERMRVHEDRLYQFDPLSARWKAPEGTEDIAFNSLATGGNGSVYAKSDDVVVDLTSPFMPHIEVKDLQSFSVAPDNRAALLSGKETQAILLTDMSPVIGDLTEKKT…	5145	1714
PgyR4_AvrE1a_1	PgyR4	AvrE	AvrE	AvrE	AvrE1	17	NA	125	GTGCATTCATCCTCGATCCACCGCAACACCGGATGCATCATTCAGCCGCCAGCCCCGGCAAACACCAACGCTGCAACTGATCTACAGCAAAAAATCGAACAACCCAAACAACGCTCCTCCCACTCACTGAGCAGTGTCGGCAAGCGAGCGCTGAAGAACGTCAGCAAACTGTTCCAGAAATCCAAGGCACCGCAGCAGAAAGCGGCCACGCCTCCCACCGTAAAAAACGTCAAGCCTTCACAGCCCACTCCAAATGCGAAGACAGCCAAAGATAAAGCGCCTGTATCTCAGTTATCGAGCAATAGTCTTGATGACCTGGACGATACGCGCCAGCCAGTAACGCGTGCGGGGCATAGCGGCGCCAGCACTTCTGGCACCAAAGCCCAAGACCCGGACGAG…	MHSSSIHRNTGCIIQPPAPANTNAATDLQQKIEQPKQRSSHSLSSVGKRALKNVSKLFQKSKAPQQKAATPPTVKNVKPSQPTPNAKTAKDKAPVSQLSSNSLDDLDDTRQPVTRAGHSGASTSGTKAQDPDEPATLQSSRQSMMTRSNGGRFELKDEKLVRNSEPQGSIQLDAKGKPDFSTFNTPGLAPLLDSILATPRQTYLAHQSKDGVHGHQLLQANGHLLHLAQDDSSLALIRSSKEALHIEGKKPPAVKLEREDGNIHIDTASGRKTQELPGKAHIAHITGVLLRHDGERMRVHEDRLYQFDPLSARWKAPEGTEDIAFNSLATGGNGSVYAKSDDVVVDLTSPFMPHIEVKDLQSFSVAPDNRAALLSGKETQAILLTDMSPVIGDLTEKKT…	5145	1714
PgyICMP9026_AvrE1a_1	PgyICMP9026	AvrE	AvrE	AvrE	AvrE1	17	NA	126	GTGCATTCATCCTCGATCCACCGCAACACCGGATGCATCATTCAGCCGCCAGCCCCGGCAAACACGAACGCTGCAACTGATCTACAGCAAAAAATCGAACAACCCAAACAACGCTCCTCCCACTCACTGAGCAGTGTCGGCAAGCGAGCGCTGAAGAACGTCAGCAAACTGTTCCAGAAATCCAAGGCACCGCAGCAGAAAGCGGCCACGCCTCCCACCGTAAAAAACGTCAAGCCTTCACAGCCCACTCCAAATGCGAAGACAGCCAAAGATAAAGCGCCTGTATCTCAGTTATCGAGCAATAGTCTTGATGACCTGGACGATACGCGCCAGCCAGTAACGCGTGCGGGGCATAGCGGCGCCAGCACTTCTGGCACCAAAGCCCAAGACCCGGACGAG…	MHSSSIHRNTGCIIQPPAPANTNAATDLQQKIEQPKQRSSHSLSSVGKRALKNVSKLFQKSKAPQQKAATPPTVKNVKPSQPTPNAKTAKDKAPVSQLSSNSLDDLDDTRQPVTRAGHSGASTSGTKAQDPDEPATLQSSRQSMMTRSNGGRFELKDEKLVRNSEPQGSIQLDAKGKPDFSTFNTPGLAPLLDSILAPPRQTYLAHQSKDGVHGHQLLQANGHLLHLAQDDSSLALIRSSKEALHIEGKKPPAVKLEREDGNIHIDTASGRKTQELPGKAHIAHITGVLLRHDGERMRVHEDRLYQFDPLSARWKAPEGTEDIAFNSLATGGNGSVYAKSDDVVVDLTSPFMPHIEVKDLQSFSVAPDNRAALLSGKETQAILLTDMSPVIGDLTEKKT…	5145	1714
PgyICMP9589_AvrE1a_1	PgyICMP9589	AvrE	AvrE	AvrE	AvrE1	17	NA	127	GTGCATTCATCCTCGATCCACCGCAACACCGGATGCATCATTCAGCCGCCAGCCCCGGCAAACACGAACGCTGCAACTGATCTACAGCAAAAAATCGAACAACCCAAACAACGCTCCTCCCACTCACTGAGCAGTGTCGGCAAGCGAGCGCTGAAGAACGTCAGCAAACTGTTCCAGAAATCCAAGGCACCGCAGCAGAAAGCGGCCACGCCTCCCACCGTAAAAAACGTCAAGCCTTCACAGCCCACTCCAAATGCGAAGACAGCCAAAGATAAAGCGCCTGTATCTCAGTTATCAAGCAATAGTCTTGATGACCTGGACGATACGCGCCAGCCAGTAACGCGTGCGGGGCATAGCGGCGCCAGCACTTCTGGCACCAAAGCCCAAGACCCGGACGAG…	MHSSSIHRNTGCIIQPPAPANTNAATDLQQKIEQPKQRSSHSLSSVGKRALKNVSKLFQKSKAPQQKAATPPTVKNVKPSQPTPNAKTAKDKAPVSQLSSNSLDDLDDTRQPVTRAGHSGASTSGTKAQDPDEPATLQSSRQSMMTRSNGGRFELKDEKLVRNSEPQGSIQLDAKGKPDFSTFNTPGLAPLLDSILATPRQTYLAHQSKDGVHGHQLLQANGHLLHLAQDDSSLALIRSSKEALHIEGKKLPAVKLEREDGNIHIDTASGRKTQELPGKAHIAHITGVLLRHDGERMRVHEDRLYQFDPLSARWKAPEGTEDIAFNSLATGGNGSVYAKSDDVVVDLTSPFMPHIEVKDLQSFSVAPDNRAALLSGKETQAILLTDMSPVIGDLTEKKT…	3189	1062
PgyICMP9589_AvrE1a_2	PgyICMP9589	AvrE	AvrE	AvrE	AvrE1	17	NA	128	GTGACTTACGGCGAAAACCCGGTCAAGGTGGTTACAGACATGGGCTTTACCGATAACAAAGCGCTGGAAAGCGGTTATGAAGCGGTCAAGACATTCCTCAAATCGTTCAAAAAAGCTGACCATGCGGTGAGCGTCAACATGCGCGCAGCCACAGGCAGCAAGGACCAGGCGGAGCTGGCCGGGAAATTCAAAAGCATGCTCAAGCAACTGGAGCATGGCGACGACGAAATTAGGCTGCAACGCAGTTACGGACTGAACCTTACCACCCCGTTCATCATTCTTGCCGACAACGCCACAGGACTATGGCCAACGGCAGGCACCACCGGCAACCGTAACTACATACTCAATGCCGAGCGTTGCGAGGGCGGCGTTACCCTGTACCTGATCAGCGAAGGTGCG…	MTYGENPVKVVTDMGFTDNKALESGYEAVKTFLKSFKKADHAVSVNMRAATGSKDQAELAGKFKSMLKQLEHGDDEIRLQRSYGLNLTTPFIILADNATGLWPTAGTTGNRNYILNAERCEGGVTLYLISEGAGNVSGGFGAGKDYWPGFFDENHPARSVDVGNSRTLTPNFRLGVDVTATVAASQRAGVVFNVPDEDIDAFIDDLFEGKLNPLQVLKKAVDHETYQARRFNFDLTAGGTADLRAGINLTEDRDPDADPNSDSFSAVVRGGFAANITVNLMTYTDNSLTQKNDKTKLLEGGKNRPRFLNNATLGGQLRGQIGGTRTAPTGSPASAPGPTLASQSAANNLGVAVNFSVENRTVKRVKFRYNVAKPITTEGLGKLSKSLGEAFKDSTTKAK…	1959	652
PgyKN44_AvrE1a_2	PgyKN44	AvrE	AvrE	AvrE	AvrE1	17	NA	129	GTGCATTCATCCTCGATCCACCGCAACACCGGATGCATCATTCAGCCGCCAGCCCCGGCAAACACGAACGCTGCAACTGATCTACAGCAAAAAATCGAACAACCCAAACAACGCTCCTCCCACTCACTGAGCAGTGTCGGCAAGCGAGCGCTGAAGAACGTCAGCAAACTGTTCCAGAAATCCAAGGCACCGCAGCAGAAAGCGGCCACGCCTCCCACCGTAAAAAACGTCAAGCCTTCACAGCCCACTCCAAATGCGAAGACAGCCAAAGATAAAGCGCCTGTATCTCAGTTATCGAGCAATAGTCTTGATGACCTGGACGATACGCGCCAGCCAGTAACGCGTGCGGGGCATAGCGGCGCCAGCACTTCTGGCACCAAAGCCCAAGACCCGGACGAG…	MHSSSIHRNTGCIIQPPAPANTNAATDLQQKIEQPKQRSSHSLSSVGKRALKNVSKLFQKSKAPQQKAATPPTVKNVKPSQPTPNAKTAKDKAPVSQLSSNSLDDLDDTRQPVTRAGHSGASTSGTKAQDPDEPATLQSSRQSMMTRSNGGRFELKDEKLVRNSEPQGSIQLDAKGKPDFSTFNTPGLAPLLDSILAPPRQTYLAHQSKDGVHGHQLLQANGHLLHLAQDDSSLALIRSSKEALHIEGKKPPAVKLEREDGNIHIDTASGRKTQELPGKAHIAHITGVLLRHDGERMRVHEDRLYQFDPLSARWKAPEGTEDIAFNSLATGGNGSVYAKSDDVVVDLTSPFMPHIEVKDLQSFSVAPDNRAALLSGKETQAILLTDMSPVIGDLTEKKT…	4011	1336
PgyUnB647_AvrE1a_2	PgyUnB647	AvrE	AvrE	AvrE	AvrE1	17	NA	130	GTGCATTCATCCTCGATCCACCGCAACACCGGATGCATCATTCAGCCGCCAGCCCCGGCAAACACGAACGCTGCAACTGATCTACAGCAAAAAATCGAACAACCCAAACAACGCTCCTCCCACTCACTGAGCAGTGTCGGCAAGCGAGCGCTGAAGAACGTCAGCAAACTGTTCCAGAAATCCAAGGCACCGCAGCAGAAAGCGGCCACGCCTCCCACCGTAAAAAACGTCAAGCCTTCACAGCCCACTCCAAATGCGAAGACAGCCAAAGATAAAGCGCCTGTATCTCAGTTATCGAGCAATAGTCTTGATGACCTGGACGATACGCGCCAGCCAGTAACGCGTGCGGGGCATAGCGGCGCCAGCACTTCTGGCACCAAAGCCCAAGACCCGGACGAG…	MHSSSIHRNTGCIIQPPAPANTNAATDLQQKIEQPKQRSSHSLSSVGKRALKNVSKLFQKSKAPQQKAATPPTVKNVKPSQPTPNAKTAKDKAPVSQLSSNSLDDLDDTRQPVTRAGHSGASTSGTKAQDPDEPATLQSSRQSMMTRSNGGRFELKDEKLVRNSEPQGSIQLDAKGKPDFSTFNTPGLAPLLDSILAPPRQTYLAHQSKDGVHGHQLLQANGHLLHLAQDDSSLALIRSSKEALHIEGKKPPAVKLEREDGNIHIDTASGRKTQELPGKAHIAHITGVLLRHDGERMRVHEDRLYQFDPLSARWKAPEGTEDIAFNSLATGGNGSVYAKSDDVVVDLTSPFMPHIEVKDLQSFSVAPDNRAALLSGKETQAILLTDMSPVIGDLTEKKT…	3963	1320
PhiICMP9314_AvrE1a_1	PhiICMP9314	AvrE	AvrE	AvrE	AvrE1	17	NA	131	TTGCATCAGGCTGCCATCAGTGGCACATGGACAGGGATATTCACCGTGCATTCATCATCGATCCACCGCAACACCGGAGGCATCATTCAGCCGACAGTCCCGGCAAACACGAACGCTGCAACTGATCTACAGCAAAAAACCGAACAACCCAAACAACGCTCCTCGCACTCACTGAGCAGTGTCGGCAAGCGAGCGCTGAAGAACGTCAGCAAACTGTTCCAGAAATCCAAGGCACCGCAGCAGAAAGCGGCCACGCCTCCCACCGTAAAAAACGTCAAGCCTTCACAGCCCACTTCAAATGCGAAGACAGCCAAAAATAAAGCGCCTGTATCTCAGTTATCGAGCAATAGTCTTGATGACCTGGACGATACGCGCCAGCCAGTGACGCGTGCGGGGCAT…	MHQAAISGTWTGIFTVHSSSIHRNTGGIIQPTVPANTNAATDLQQKTEQPKQRSSHSLSSVGKRALKNVSKLFQKSKAPQQKAATPPTVKNVKPSQPTSNAKTAKNKAPVSQLSSNSLDDLDDTRQPVTRAGHSGASTSGTKAQDPDEPATIQSSRQSMMTRSNGGRFELKDEKLVRNSEPQGSIQLDAKGKPDFSTFNTPGLAPLLDSILATPRQTYLAHQSKDGVHGHQLLQANGHLLHLAQDDSSLALIRSSKEALHIEGKKPPAVKLEREDGNIHIDTASGRKTQELPGKAHIAHITGVLLRHDGERMRVHEDRLYQFDPLSARWKAPEGTEDIAFNSLATGGNGSVYAKSDDVVVDLTSPFMPHIEVKDLQSFSVAPDNRAALLSGKETQAILL…	5190	1729
PhiICMP9623_AvrE1a_1	PhiICMP9623	AvrE	AvrE	AvrE	AvrE1	17	NA	131	TTGCATCAGGCTGCCATCAGTGGCACATGGACAGGGATATTCACCGTGCATTCATCATCGATCCACCGCAACACCGGAGGCATCATTCAGCCGACAGTCCCGGCAAACACGAACGCTGCAACTGATCTACAGCAAAAAACCGAACAACCCAAACAACGCTCCTCGCACTCACTGAGCAGTGTCGGCAAGCGAGCGCTGAAGAACGTCAGCAAACTGTTCCAGAAATCCAAGGCACCGCAGCAGAAAGCGGCCACGCCTCCCACCGTAAAAAACGTCAAGCCTTCACAGCCCACTTCAAATGCGAAGACAGCCAAAAATAAAGCGCCTGTATCTCAGTTATCGAGCAATAGTCTTGATGACCTGGACGATACGCGCCAGCCAGTGACGCGTGCGGGGCAT…	MHQAAISGTWTGIFTVHSSSIHRNTGGIIQPTVPANTNAATDLQQKTEQPKQRSSHSLSSVGKRALKNVSKLFQKSKAPQQKAATPPTVKNVKPSQPTSNAKTAKNKAPVSQLSSNSLDDLDDTRQPVTRAGHSGASTSGTKAQDPDEPATIQSSRQSMMTRSNGGRFELKDEKLVRNSEPQGSIQLDAKGKPDFSTFNTPGLAPLLDSILATPRQTYLAHQSKDGVHGHQLLQANGHLLHLAQDDSSLALIRSSKEALHIEGKKPPAVKLEREDGNIHIDTASGRKTQELPGKAHIAHITGVLLRHDGERMRVHEDRLYQFDPLSARWKAPEGTEDIAFNSLATGGNGSVYAKSDDVVVDLTSPFMPHIEVKDLQSFSVAPDNRAALLSGKETQAILL…	5190	1729
PhoICMP7840_AvrE1a_1	PhoICMP7840	AvrE	AvrE	AvrE	AvrE1	17	NA	132	GTGCATTCATCATCGATCCACCGCAACACCGGGAGCATCATTCAGCCGCCAGTCCCGGCAAACACGAACGCTGCAACGGATCTACAGCAAAAAATCGAACAACCCAAACAACGCTCCTCGCACTCACTGAGCAGTGTCGGCAAGCGAGCGCTGAAGAACGTCAGCAAACTGTTCCAGAAATCCAAGGCACCGCAGCAGAAAGCGGCCACGCCTCCCACCGTAAAAAACGTCAAGCCTTCACAGCCCACTTCAAATTCGAAGACAGCCAAAGACAAAGCGCCTGTATCTCAGTTATCGAGCAATAGTCTTGATGACCTGGAGGATACGCGCCAGCCAGTGACGCGTGCGGGGCATAGCGGCGCCAGCACTTCCGGCACCAAAGCCCAAGACCCGGACGAG…	MHSSSIHRNTGSIIQPPVPANTNAATDLQQKIEQPKQRSSHSLSSVGKRALKNVSKLFQKSKAPQQKAATPPTVKNVKPSQPTSNSKTAKDKAPVSQLSSNSLDDLEDTRQPVTRAGHSGASTSGTKAQDPDEPATLQSSRQSMMTRSNGGRFELKDEKLVRNSEPQGSIQLDAKGKPDFSTFNTPGLAPLLDSILATPMQTYLAHQSKDGVHGHQLLQANGHLLHLAQDDSSLALIRSSKEALHIEGKKPPAVKLEREDGNIHIDTASGRKTQELPGKAHIAHITGVLLRHDGERMRVHEDRLYQFDPLSARWKAPEGTEDIAFNSLATGGNGSVYAKSDDVVVDLTSPFMPHIEVKDLQSFSVAPDNRAALLSGKETQAILLTDMSPVIGDLTEKKT…	5157	1718
PhoICMP7847_AvrE1a_1	PhoICMP7847	AvrE	AvrE	AvrE	AvrE1	17	119	133	TTGGGCAAGCTGTCTAAAAGCCTCGGCGAGGCATTCAAGGACAGCACGACCAAAGCAAAACTGGCCGAACTGGCCGACCCGCTGAATGCGCGTTACGCAGGCAAGAAACCGGATGAGGTTATTCAGGCGCACCTCGACGGCCTTGAAGAACTGTTTGCCGACACTCAATGGCAGAACGACAAGCAGTACAAAGCGCTTCGTGGTCTGAAACGCGGGGCGGTCGAGCATCGGGCATCAGTCAATAAGCACAGCGTGATGGATAACGCACGTTTTGAGACCAGCAAAACCAACCTCTCCGGCCTGAGCAGTGAAAGCATACTCACCAAAATCATGGGCTCAGTGCGTGAAGCGAGCGCCCCCGGCAATGCGGCCAGGGTTGCCGAGTTCATGCGCCAGGAC…	MGKLSKSLGEAFKDSTTKAKLAELADPLNARYAGKKPDEVIQAHLDGLEELFADTQWQNDKQYKALRGLKRGAVEHRASVNKHSVMDNARFETSKTNLSGLSSESILTKIMGSVREASAPGNAARVAEFMRQDPKLRAMLKDMEGSIGTLARVRLEPKDSLVDKIDEGSLDGTMTQSDFSALLGDRNQMRIKRLVVFHTATQAENFTSPTPLVSYNSGANMSVTKTLGRINFIYGADQDKPIGYTFDGELSRPSASLKEAASKLKQEGFELKS	822	273
PhoICMP7847_AvrE1a_2	PhoICMP7847	AvrE	AvrE	AvrE	AvrE1	17	NA	134	GTGCATTCATCATCGATCCACCGCAACACCGGGAGCATCATTCAGCCGCCAGTCCCGGCAAACACGAACGCTGCAACGGATCTACAGCAAAAAATCGAACAACCCAAACAACGCTCCTCGCACTCACTGAGCAGTGTCGGCAAGCGAGCGCTGAAGAACGTCAGCAAACTGTTCCAGAAATCCAAGGCACCGCAGCAGAAAGCGGCCACGCCTCCCACCGTAAAAAACGTCAAGCCTTCACAGCCCACTTCAAATTCGAAGACAGCCAAAGACAAAGCGCCTGTATCTCAGTTATCGAGCAATAGTCTTGATGACCTGGAGGATACGCGCCAGCCAGTGACGCGTGCGGGGCATAGCGGCGCCAGCACTTCCGGCACCAAAGCCCAAGACCCGGACGAG…	MHSSSIHRNTGSIIQPPVPANTNAATDLQQKIEQPKQRSSHSLSSVGKRALKNVSKLFQKSKAPQQKAATPPTVKNVKPSQPTSNSKTAKDKAPVSQLSSNSLDDLEDTRQPVTRAGHSGASTSGTKAQDPDEPATLQSSRQSMMTRSNGGRFELKDEKLVRNSEPQGSIQLDAKGKPDFSTFNTPGLAPLLDSILATPMQTYLAHQSKDGVHGHQLLQANGHLLHLAQDDSSLALIRSSKEALHIEGKKPPAVKLEREDGNIHIDTASGRKTQELPGKAHIAHITGVLLRHDGERMRVHEDRLYQFDPLSARWKAPEGTEDIAFNSLATGGNGSVYAKSDDVVVDLTSPFMPHIEVKDLQSFSVAPDNRAALLSGKETQAILLTDMSPVIGDLTEKKT…	3135	1044
Pla107_AvrE1a_1	Pla107	AvrE	AvrE	AvrE	AvrE1	17	119	135	GTGGTACGCGGCGGATTCGCGGCGAACATCACCGTTAACCTGATGACCTACACCGATTACTCGTTGACCCAGAAAAACGACAAGACCGAGTTGCGCGAAGGCGGCAAGAACCGCCCGCGTTTTCTCAACAACGCAACGCTTGGCGGGCAGCTTCGCGGGCAGATCGGCGGCACCCACACGGCGCCCACAGGCACACCGGCCTCCGCCCCGGGACCGACGCCCGCGTCACAGTCAGCCGCCAACAATCTGGGAGTAGCGGTCAATTTCAGCGTAGAGAACAGGACTGTCAAACGGGTCAAGTTTCGCTATAACGTCGCCAAGCCGATAACCACCGAAGGTTTGGGCAAGCTGTCTAAAAGCCTCGGCGAGGCATTCAAGGACAGCACGACCAAAGCAAAA…	MVRGGFAANITVNLMTYTDYSLTQKNDKTELREGGKNRPRFLNNATLGGQLRGQIGGTHTAPTGTPASAPGPTPASQSAANNLGVAVNFSVENRTVKRVKFRYNVAKPITTEGLGKLSKSLGEAFKDSTTKAKLAELADPLNARYAGKKPDEVIQAHLDGLEELFADTQWQNDKQYKALRGLKRGAVEHRASVNKHSVMDNARFETSKTNLSGLSSESILTKIMGSVREASAPGNAARVAEFMRQDPKLRAMLKDMEGSIGTLARVRLEPKDSLVDKIDEGSLDGTMTQSDLSALLGDRNQMRIKRLVVFHTATQAENFTSPTPLVSYNSGANMSVTKTLGRINFIYGADQDKPIGYTFDGELSRPSASLKEAAIKLKQEGFELKS	1161	386
Pla107_AvrE1a_2	Pla107	AvrE	AvrE	AvrE	AvrE1	17	NA	136	GTGCATTCATCATCGATCCACCGCAACACCGGAGGCATCATTCAGCCGACAGTCCCGGCAAACACGAACGCTGCAACTGATCTACAGCAAAAAACCGAACAACCCAAACAACGCTCCTCGCACTCACTGAGCAGTGTCGGCAAGCGAGCGCTGAAGAACGTCAGCAAACTGTTCCAGAAATCCAAGGCACCGCAGCAGAAAGCGGCCACGCCTCCCACCGTAAAAAACGTCAAGCCTTCACAGCCCACTTCAAATGCGAAGACAGCCAAAGATAAAGCGCCTGTATCTCAGTTATCGAGCAATAGTCTTGATGACCTGGACGATACGCGCCAGCCAGTGACGCGTGCGGGGCATAGCGGCGCCAGCACTTCCGGCACCAAAGCCCAAGACCCGGACGAG…	MHSSSIHRNTGGIIQPTVPANTNAATDLQQKTEQPKQRSSHSLSSVGKRALKNVSKLFQKSKAPQQKAATPPTVKNVKPSQPTSNAKTAKDKAPVSQLSSNSLDDLDDTRQPVTRAGHSGASTSGTKAQDPDEPATIQSSRQSMMTRSNGGRFELKDEKLVRNSEPQGSIQLDAKGKPDFSTFNTPGLAPLLDSILATPRQTYLAHQSKDGVHGHQLLQANGHLLHLAQDDSSLALIRSSKEALHIEGKKPPAVKLEREHGNIHIDTASGRKTQELPGKAHIAHITGVLLRHDGERMRVHEDRLYQFDPLSARWKAPEGTEDIAFNSLATGGNGSVYAKSDDVVVDLTSPFMPHIEVKDLQSFSVAPDNRAALLSGKETQAILLTDMSPVIGDLTEKKT…	3954	1317
Pla301315_AvrE1a_1	Pla301315	AvrE	AvrE	AvrE	AvrE1	17	NA	137	GTGCATTCATCATCGATCCACCGCAACACCGGAGGCATCATTCAGCCGACAGTCCCGGCAAACACGAACGCTGCAACTGATCTACAGCAAAAAACCGAACAACCCAAACAACGCTCCTCGCACTCACTGAGCAGTGTCGGCAAGCGAGCGCTGAAGAACGTCAGCAAACTGTTCCAGAAATCCAAGGCACCGCAGCAGAAAGCGGCCACGCCTCCCACCGTAAAAAACGTCAAGCCTTCACAGCCCACTTCAAATGCGAAGACAGCCAAAGATAAAGCGCCTGTATCTCAGTTATCGAGCAATAGTCTTGATGACCTGGACGATACGCGCCAGCCAGTGACGCGTGCGGGGCATAGCGGCGCCAGCACTTCCGGCACCAAAGCCCAAGACCCGGACGAG…	MHSSSIHRNTGGIIQPTVPANTNAATDLQQKTEQPKQRSSHSLSSVGKRALKNVSKLFQKSKAPQQKAATPPTVKNVKPSQPTSNAKTAKDKAPVSQLSSNSLDDLDDTRQPVTRAGHSGASTSGTKAQDPDEPATIQSSRQSMMTRSNGGRFELKDEKLVRNSEPQGSIQLDAKGKPDFSTFNTPGLAPLLDSILATPRQTYLAHQSKDGVHGHQLLQANGHLLHLAQDDSSLALIRSSKEALHIEGKKPPAVKLEREHGNIHIDTASGRKTQELPGKAHIAHITGVLLRHDGERMRVHEDRLYQFDPLSARWKAPEGTEDIAFNSLATGGNGSVYAKSDDVVVDLTSPFMPHIEVKDLQSFSVAPDNRAALLSGKETQAILLTDMSPVIGDLTEKKT…	5145	1714
PlaICMP1448_AvrE1a_1	PlaICMP1448	AvrE	AvrE	AvrE	AvrE1	17	NA	137	GTGCATTCATCATCGATCCACCGCAACACCGGAGGCATCATTCAGCCGACAGTCCCGGCAAACACGAACGCTGCAACTGATCTACAGCAAAAAACCGAACAACCCAAACAACGCTCCTCGCACTCACTGAGCAGTGTCGGCAAGCGAGCGCTGAAGAACGTCAGCAAACTGTTCCAGAAATCCAAGGCACCGCAGCAGAAAGCGGCCACGCCTCCCACCGTAAAAAACGTCAAGCCTTCACAGCCCACTTCAAATGCGAAGACAGCCAAAGATAAAGCGCCTGTATCTCAGTTATCGAGCAATAGTCTTGATGACCTGGACGATACGCGCCAGCCAGTGACGCGTGCGGGGCATAGCGGCGCCAGCACTTCCGGCACCAAAGCCCAAGACCCGGACGAG…	MHSSSIHRNTGGIIQPTVPANTNAATDLQQKTEQPKQRSSHSLSSVGKRALKNVSKLFQKSKAPQQKAATPPTVKNVKPSQPTSNAKTAKDKAPVSQLSSNSLDDLDDTRQPVTRAGHSGASTSGTKAQDPDEPATIQSSRQSMMTRSNGGRFELKDEKLVRNSEPQGSIQLDAKGKPDFSTFNTPGLAPLLDSILATPRQTYLAHQSKDGVHGHQLLQANGHLLHLAQDDSSLALIRSSKEALHIEGKKPPAVKLEREHGNIHIDTASGRKTQELPGKAHIAHITGVLLRHDGERMRVHEDRLYQFDPLSARWKAPEGTEDIAFNSLATGGNGSVYAKSDDVVVDLTSPFMPHIEVKDLQSFSVAPDNRAALLSGKETQAILLTDMSPVIGDLTEKKT…	5145	1714
PlaICMP3402_AvrE1a_1	PlaICMP3402	AvrE	AvrE	AvrE	AvrE1	17	NA	137	GTGCATTCATCATCGATCCACCGCAACACCGGAGGCATCATTCAGCCGACAGTCCCGGCAAACACGAACGCTGCAACTGATCTACAGCAAAAAACCGAACAACCCAAACAACGCTCCTCGCACTCACTGAGCAGTGTCGGCAAGCGAGCGCTGAAGAACGTCAGCAAACTGTTCCAGAAATCCAAGGCACCGCAGCAGAAAGCGGCCACGCCTCCCACCGTAAAAAACGTCAAGCCTTCACAGCCCACTTCAAATGCGAAGACAGCCAAAGATAAAGCGCCTGTATCTCAGTTATCGAGCAATAGTCTTGATGACCTGGACGATACGCGCCAGCCAGTGACGCGTGCGGGGCATAGCGGCGCCAGCACTTCCGGCACCAAAGCCCAAGACCCGGACGAG…	MHSSSIHRNTGGIIQPTVPANTNAATDLQQKTEQPKQRSSHSLSSVGKRALKNVSKLFQKSKAPQQKAATPPTVKNVKPSQPTSNAKTAKDKAPVSQLSSNSLDDLDDTRQPVTRAGHSGASTSGTKAQDPDEPATIQSSRQSMMTRSNGGRFELKDEKLVRNSEPQGSIQLDAKGKPDFSTFNTPGLAPLLDSILATPRQTYLAHQSKDGVHGHQLLQANGHLLHLAQDDSSLALIRSSKEALHIEGKKPPAVKLEREHGNIHIDTASGRKTQELPGKAHIAHITGVLLRHDGERMRVHEDRLYQFDPLSARWKAPEGTEDIAFNSLATGGNGSVYAKSDDVVVDLTSPFMPHIEVKDLQSFSVAPDNRAALLSGKETQAILLTDMSPVIGDLTEKKT…	5145	1714
PlaN7512_AvrE1a_1	PlaN7512	AvrE	AvrE	AvrE	AvrE1	17	NA	137	GTGCATTCATCATCGATCCACCGCAACACCGGAGGCATCATTCAGCCGACAGTCCCGGCAAACACGAACGCTGCAACTGATCTACAGCAAAAAACCGAACAACCCAAACAACGCTCCTCGCACTCACTGAGCAGTGTCGGCAAGCGAGCGCTGAAGAACGTCAGCAAACTGTTCCAGAAATCCAAGGCACCGCAGCAGAAAGCGGCCACGCCTCCCACCGTAAAAAACGTCAAGCCTTCACAGCCCACTTCAAATGCGAAGACAGCCAAAGATAAAGCGCCTGTATCTCAGTTATCGAGCAATAGTCTTGATGACCTGGACGATACGCGCCAGCCAGTGACGCGTGCGGGGCATAGCGGCGCCAGCACTTCCGGCACCAAAGCCCAAGACCCGGACGAG…	MHSSSIHRNTGGIIQPTVPANTNAATDLQQKTEQPKQRSSHSLSSVGKRALKNVSKLFQKSKAPQQKAATPPTVKNVKPSQPTSNAKTAKDKAPVSQLSSNSLDDLDDTRQPVTRAGHSGASTSGTKAQDPDEPATIQSSRQSMMTRSNGGRFELKDEKLVRNSEPQGSIQLDAKGKPDFSTFNTPGLAPLLDSILATPRQTYLAHQSKDGVHGHQLLQANGHLLHLAQDDSSLALIRSSKEALHIEGKKPPAVKLEREHGNIHIDTASGRKTQELPGKAHIAHITGVLLRHDGERMRVHEDRLYQFDPLSARWKAPEGTEDIAFNSLATGGNGSVYAKSDDVVVDLTSPFMPHIEVKDLQSFSVAPDNRAALLSGKETQAILLTDMSPVIGDLTEKKT…	5145	1714
PlaYM8003_AvrE1a_1	PlaYM8003	AvrE	AvrE	AvrE	AvrE1	17	NA	137	GTGCATTCATCATCGATCCACCGCAACACCGGAGGCATCATTCAGCCGACAGTCCCGGCAAACACGAACGCTGCAACTGATCTACAGCAAAAAACCGAACAACCCAAACAACGCTCCTCGCACTCACTGAGCAGTGTCGGCAAGCGAGCGCTGAAGAACGTCAGCAAACTGTTCCAGAAATCCAAGGCACCGCAGCAGAAAGCGGCCACGCCTCCCACCGTAAAAAACGTCAAGCCTTCACAGCCCACTTCAAATGCGAAGACAGCCAAAGATAAAGCGCCTGTATCTCAGTTATCGAGCAATAGTCTTGATGACCTGGACGATACGCGCCAGCCAGTGACGCGTGCGGGGCATAGCGGCGCCAGCACTTCCGGCACCAAAGCCCAAGACCCGGACGAG…	MHSSSIHRNTGGIIQPTVPANTNAATDLQQKTEQPKQRSSHSLSSVGKRALKNVSKLFQKSKAPQQKAATPPTVKNVKPSQPTSNAKTAKDKAPVSQLSSNSLDDLDDTRQPVTRAGHSGASTSGTKAQDPDEPATIQSSRQSMMTRSNGGRFELKDEKLVRNSEPQGSIQLDAKGKPDFSTFNTPGLAPLLDSILATPRQTYLAHQSKDGVHGHQLLQANGHLLHLAQDDSSLALIRSSKEALHIEGKKPPAVKLEREHGNIHIDTASGRKTQELPGKAHIAHITGVLLRHDGERMRVHEDRLYQFDPLSARWKAPEGTEDIAFNSLATGGNGSVYAKSDDVVVDLTSPFMPHIEVKDLQSFSVAPDNRAALLSGKETQAILLTDMSPVIGDLTEKKT…	5145	1714
PlaICMP3507_AvrE1a_1	PlaICMP3507	AvrE	AvrE	AvrE	AvrE1	17	119	138	TTGGGCAAGCTGTCTAAAAGCCTCGGCGAGGCATTCAAGGACAGCACGACCAAAGCAAAACTGGCCGAACTGGCCGACCCGCTGAATGCGCGTTACGCAGGCAAGAAACCGGATGAGGTTATTCAGGCGCACCTCGACGGCCTTGAAGAACTGTTTGCCGACACTCAATGGCAGAACGACAAGCAGTACAAAGCGCTTCGTGGTCTGAAACGCGGGGCGGTCGAGCATCGGGCATCAGTCAATAAGCACAGCGTGATGGATAACGCACGTTTTGAGACCCGCAAAACCAACCTCTCCGGCCTGAGCAGTGAAAGCATACTCACCAAAATCATGGGCTCAGTGCGTGAAGCGAGCGCCCCCGGCAATGCGGCCAGGGTTGCCGAGTTCATGCGCCAGGAC…	MGKLSKSLGEAFKDSTTKAKLAELADPLNARYAGKKPDEVIQAHLDGLEELFADTQWQNDKQYKALRGLKRGAVEHRASVNKHSVMDNARFETRKTNLSGLSSESILTKIMGSVREASAPGNAARVAEFMRQDPKLRAMLKDMEGSIGTLARVRLEPKDSLVDKIDEGSLDGTMTQSDLSALLGDRNQMRIKRLVVFHTATQAENFTSPTPLVSYNSGANMSVTKTLGRVNFIYGADQDKPIGYTFDGELSRPSASLKEAASKLKQEGFELKS	822	273
PlaICMP3507_AvrE1a_2	PlaICMP3507	AvrE	AvrE	AvrE	AvrE1	17	NA	139	GTGCATTCATCATCGATCCACCGCAACACCGGAGGCATCATTCAGCCGACAGTCCCGGCAAACACGAACGCTGCAACTGATCTACAGCAAAAAACCGAACAACCCAAACAACGCTCCTCGCACTCACTGAGCAGTGTCGGCAAGCGAGCGCTGAAGAACGTCAGCAAACTGTTCCAGAAATCCAAGGCACCGCAGCAGAAAGCGGCCACGCCTCCCACCGTAAAAAACGTCAAGCCTTCACAGCCCACTTCAAATGCGAAGACAGCCAAAAATAAAGCGCCTGTATCTCAGTTATCGAGCAATAGTCTTGATGACCTGGACGATACGCGCCAGCCAGTGACGCGTGCGGGGCATAGCGGCGCCAGCACTTCCGGCACCAAAGCCCAAGACCCGGACGAG…	MHSSSIHRNTGGIIQPTVPANTNAATDLQQKTEQPKQRSSHSLSSVGKRALKNVSKLFQKSKAPQQKAATPPTVKNVKPSQPTSNAKTAKNKAPVSQLSSNSLDDLDDTRQPVTRAGHSGASTSGTKAQDPDEPATIQSSRQSMMTRSNGGRFELKDEKLVRNSEPQGSIQLDAKGKPDFSTFNTPGLAPLLDSILATPRQTYLAHQSKDGVHGHQLLQANGHLLHLAQDDSSLALIRSSKEALHIEGKKPPAVKLEREDGNIHIDTASGRKTQELPGKAHIAHITGVLLRHDGERMRVHEDRLYQFDPLSARWKAPEGTEDIAFNSLATGGNGSVYAKSDDVVVDLTSPFMPHIEVKDLQSFSVAPDNRAALLSGKETQAILLTDMSPVIGDLTEKKT…	3177	1058
PlaICMP826_AvrE1a_1	PlaICMP826	AvrE	AvrE	AvrE	AvrE1	17	137	140	GTGCATTCATCATCGATCCACCGCAACACCGGAGGCATCATTCAGCCGACAGTCCCGGCAAACACGAACGCTGCAACTGATCTACAGCAAAAAACCGAACAACCCAAACAACGCTCCTCGCACTCACTGAGCAGTGTCGGCAAGCGAGCGCTGAAGAACGTCAGCAAACTGTTCCAGAAATCCAAGGCACCGCAGCAGAAAGCGGCCACGCCTCCCACCGTAAAAAACGTCAAGCCTTCACAGCCCACTTCAAATGCGAAGACAGCCAAAGATAAAGCGCCTGTATCTCAGTTATCGAGCAATAGTCTTGATGACCTGGACGATACGCGCCAGCCAGTGACGCGTGCGGGGCATAGCGGCGCCAGCACTTCCGGCACCAAAGCCCAAGACCCGGACGAG…	MHSSSIHRNTGGIIQPTVPANTNAATDLQQKTEQPKQRSSHSLSSVGKRALKNVSKLFQKSKAPQQKAATPPTVKNVKPSQPTSNAKTAKDKAPVSQLSSNSLDDLDDTRQPVTRAGHSGASTSGTKAQDPDEPATIQSSRQSMMTRSNGGRFELKDEKLVRNSEPQGSIQLDAKGKPDFSTFNTPGLAPLLDSILATPRQTYLAHQSKDGVHGHQLLQANGHLLHLAQDDSSLALIRSSKEALHIEGKKPPAVKLEREHGNIHIDTASGRKTQELPGKAHIAHITGVLLRHDGERMRVHEDRLYQFDPLSARWKAPEGTEDIAFNSLATGGNGSVYAKSDDVVVDLTSPFMPHIEVKDLQSFSVAPDNRAALLSGKETQAILLTDMSPVIGDLTEKKT…	1602	533
PlaICMP826_AvrE1a_2	PlaICMP826	AvrE	AvrE	AvrE	AvrE1	17	NA	141	GTGCTCAAGGGCGGCAAACTGCACGCGCTCAAGGTGACTCCTGAACACCCCAACATGGCCTTTGACCACAACACAGCGCTGGCCCAGACCGCGCGCTCGACAACAGTCGAGATGGGCAAGGAAATCGAAGGCCTCGACGACCGAGTAATCACAGCCTTTGCAATGGTCAGCAACAAATGCTTCGTCGCCCTTGATGACCAGAACAAGCTGACCGCCCACAGCAAGGATCACAAACCCGTCACTCTCGATATCTCCGGCCTGGAAGGCGATATCAAGAGCCTTGCTCTGGATGAAAAACAGAACCTTCATGCGCTCACCAGTACCGGTGGGCTTTATTGCCTGCCCAAGGAAGCCTGGCAATCGACAAAGCTGGGGGATCAGATGCGCCCCCGCTGGACG…	MLKGGKLHALKVTPEHPNMAFDHNTALAQTARSTTVEMGKEIEGLDDRVITAFAMVSNKCFVALDDQNKLTAHSKDHKPVTLDISGLEGDIKSLALDEKQNLHALTSTGGLYCLPKEAWQSTKLGDQMRPRWTPVALPGGQPVKALFANDDNVLSAQVEDAEGQGLMRLSAGKWQAFEQRPVEENGLNDVHSRITGSNKTWRIPKTGLTLRMDINAFGRSGVEKSKKASTREFMRANVYKNTAEVPRWMKNVGNSIQHRHHGRLGLNEVYETESMLFKQLELINESGGRPPAPGKDLKARIAALESKLGPQGATLVKELETLREELENHSYTALMSIGQSYGKVKNLRQQDGILNQHGELAKPSVRTQFGKKLAELGTKLNFKSSGHDLVKELQDALTQ…	3408	1135
PlaYM7902_AvrE1a_1	PlaYM7902	AvrE	AvrE	AvrE	AvrE1	17	NA	142	GTGCATTCATCATCGATCCACCGCAACACCGGAGGCATCATTCAGCCGACAGTCCCGGCAAACACGAACGCTGCAACTGATCTACAGCAAAAAACCGAACAACCCAAACAACGCTCCTCGCACTCACTGAGCAGTGTCGGCAAGCGAGCGCTGAAGAACGTCAGCAAACTGTTCCAGAAATCCAAGGCACCGCAGCAGAAAGCGGCCACGCCTCCCACCGTAAAAAACGTCAAGCCTTCACAGCCCACTTCAAATGCGAAGACAGCCAAAGATAAAGCGCCTGTATCTCAGTTATCGAGCAATAGTCTTGATGACCTGGACGATACGCGCCAGCCAGTGACGCGTGCGGGGCATAGCGGCGCCAGCACTTCCGGCACCAAAGCCCAAGACCCGGACGAG…	MHSSSIHRNTGGIIQPTVPANTNAATDLQQKTEQPKQRSSHSLSSVGKRALKNVSKLFQKSKAPQQKAATPPTVKNVKPSQPTSNAKTAKDKAPVSQLSSNSLDDLDDTRQPVTRAGHSGASTSGTKAQDPDEPATIQSSRQSMMTRSNGGRFELKDEKLVRNSEPQGSIQLDAKGKPDFSTFNTPGLAPLLDSILATPRQTYLAHQSKDGVHGHQLLQANGHLLHLAQDDSSLALIRSSKEALHIEGKKPPAVKLEREHGNIHIDTASGRKTQELPGKAHIAHITGVLLRHDGERMRVHEDRLYQFDPLSARWKAPEGTEDIAFNSLATGGNGSVYAKSDDVVVDLTSPFMPHIEVKDLQSFSVAPDNRAALLSGKETQAILLTDMSPVIGDLTEKKT…	5235	1744
PmeICMP5711_AvrE1a_1	PmeICMP5711	AvrE	AvrE	AvrE	AvrE1	17	NA	143	GTGCATTCATCATCGATCCACCGCAACACCGGAAGCATCATTCAGCCGCCAGTCCCGGCAAACACGAACGCTGCAACTGATCTACAGCAAAAAATCGAACAACCCAAACAACGCTCCTCCCACTCACTGAGCAGTGTCGGCAAGCGAGCGCTGAAGAACGTCAGCAAACTGTTCCAGAAATCCAAGGCACCGCAGCAGAAAGCGGCCACGCCTCCCACCGTAAAAAACGTCAAGCCTTCACAGCCCACTTCAAATGCGAAGACAGCCAAAGATAAAGCGCCTGTATCTCAGTTATCGAGCAATAGTCTTGATGACCTGGACGATACGCGCCAGCCAGTGACGCGTGCGGGGCATAGCGGCGCCAGCACTTCCGGCACCAAAGCCCAAGACCCGGACGAG…	MHSSSIHRNTGSIIQPPVPANTNAATDLQQKIEQPKQRSSHSLSSVGKRALKNVSKLFQKSKAPQQKAATPPTVKNVKPSQPTSNAKTAKDKAPVSQLSSNSLDDLDDTRQPVTRAGHSGASTSGTKAQDPDEPAIIQSSRQPMMTRSNGGRFELKDEKLVRNSEPQGSIQLDDKGKPDFSTFNTPGLAPLLDSILATPRQTYLAHQSKDGVHGHQLLQANGHLLHLAQDDSSLALIRSSKEALHIEGKKPPAVKLEREDGNIHIDTASGRKTQELPGKAHIAHITGVLLRHDGERMRVHEDRLYQFDPLSARWKAPEGTEDIAFNSLATGGNGSVYAKSDDVVVDLTSPFMPHIEVKDLQSFSVAPDNRAALLSGKETQAILLTDMSPVIGDLTEKKT…	5124	1707
PmeICMP6289_AvrE1a_1	PmeICMP6289	AvrE	AvrE	AvrE	AvrE1	17	NA	144	GTGCATTCATCATCGATCCACCGCAACACCGGGAACATCATTCAGCCGCCAGTCCCGGCAAACACGAACGCTGCAACGGATCTACAGCAAAAAATCGAACAACCCAAACAACGCTCCTCGCACTCACTGAGCAGTGTCGGCAAGCGAGCGCTGAAGAACGTCAGCAAACTGTTCCAGAAATCCAAGGCACCGCAGCAGAAAGCGGCCACGCCTCCCACCGTAAAAAACGTCAAGCCTACACAGCCCACTTCAAATTCGAAGACAGCCAAAGACAAAGCGCCTGTATCTCAGTTATCGAGCAATAGTCTTGATGACCTGGACGATACGCGCCAGCCAGTGACGCGTGCGGGGCATAGCGGCGCCAGCACTTCCGGCACCAAAGCCCAAGACCCGGACGAG…	MHSSSIHRNTGNIIQPPVPANTNAATDLQQKIEQPKQRSSHSLSSVGKRALKNVSKLFQKSKAPQQKAATPPTVKNVKPTQPTSNSKTAKDKAPVSQLSSNSLDDLDDTRQPVTRAGHSGASTSGTKAQDPDEPATLQSSRQSMMTRSNGGRFELKDEKLVRNSEPQGSIQLDAKGKPDFSTFNTPGLAPLLDSILATPMQTYLAHQSKDGVHGHQLLQANGHLLHLAQDDSSLALIRSSKEALHIEGKKPPAVKLEREDGNIHIDTASGRKTQELPGKAHIAHITGVLLRHDGERMRVHEDRLYQFDPLSARWKAPEGTEDIAFNSLATGGNGSVYAKSDDVVVDLTSPFMPHIEVKDLQSFSVAPDNRAALLSGKETQAILLTDMSPVIGDLTEKKT…	5145	1714
Pmo301020_AvrE1a_1	Pmo301020	AvrE	AvrE	AvrE	AvrE1	17	NA	145	GTGAAACTGGAGCGTGAAGACGGCAACATTCACATCGACACCGCCAGCGGACGCAAGACTCAAGAGTTACCCGGCAAGGCGCACATCGCTCACATCACCGGCGTGCTTCTCAGGCACGACGGCGAGCGTATGCGTGTGCATGAAGACCGGCTCTATCAGTTCGACCCGCTCAGTGCTCGCTGGAAAGCGCCTGAAGGCACGGAGGACATTGCTTTCAATAGTCTGGCAACAGGCGGCAACGGCTCGGTCTATGCGAAAAGCGACGATGTGGTAGTCGACCTCACGAGCCCTTTCATGCCGCACATCGAAGTCAAGGATCTGCAGTCATTTTCGGTGGCACCGGACAACAGAGCGGCATTGCTCAGCGGCAAGGAGACTCAGGCGATCCTGCTCACAGAC…	MKLEREDGNIHIDTASGRKTQELPGKAHIAHITGVLLRHDGERMRVHEDRLYQFDPLSARWKAPEGTEDIAFNSLATGGNGSVYAKSDDVVVDLTSPFMPHIEVKDLQSFSVAPDNRAALLSGKETQAILLTDMSPVIGDLTEKKTKALELDGGKAQAAAVGLSDNKLFIADTQGRLYSADRSAFESNDPQLKLTPDQANFQLAGLPLGGHDSVTGFINGDDGRVHALIKNRQGEIHSHALNEQYSKLESGWNLTNALVLSNNRGLSMPPPPTAADRLNLDRAGLVGLSEGRIQRWDATPECWKDAGIKDIERLQRGADSNAYVLKGGKLHALKVTPEHPNMAFDHNTALAQTARSTTVEMGKEIEGLDDRVITAFAMVSNKCFVALDDQNKLTAHSKD…	4386	1461
PmoICMP4331_AvrE1a_1	PmoICMP4331	AvrE	AvrE	AvrE	AvrE1	17	NA	146	GTGCATTCATCCTCGATCCACCGCAACACCGGAAGCATCATTCAGCCGCCAGTCCCGGCAAACACGAACGCTGCAACTGATCTACAGCAAAAAATCGAACAACCCAAACAACGCTCCTCCCACTCACTGAGCAGTGTCGGCAAGCGAGCGCTGAAGAACGTCAGCAAACTGTTCCAGAAATCCAAGGCACCGCAGCAGAAAGCGGCCACGCCTCCCACCGTAAAAAACGTCAAGCCTTCACAGCCCACTTCAAATGCGAAGACAGCCAAAGATAAAGTGCCTGTATCTCAGTTATCGAGCAATAGTCTTGATGACCTGGACGATACGCGCCAGCCAGTGATGCGTGCGGGGCATAGCGGCGCCAGCACTTCCGGCACCAAAGCCCAAGACCCGGACGAG…	MHSSSIHRNTGSIIQPPVPANTNAATDLQQKIEQPKQRSSHSLSSVGKRALKNVSKLFQKSKAPQQKAATPPTVKNVKPSQPTSNAKTAKDKVPVSQLSSNSLDDLDDTRQPVMRAGHSGASTSGTKAQDPDEPATIQSSRQSMMTRSNGGRFELKDEKLVRNSEPQGSIQLDAKGKPDFSTFNTPGLAPLLDSILATPRQTYLAHQSKDGVHGHQLLQANGHLLHLAQDDSSLALIRSSKEALHIEGKKPPAVKLEREDGNIHIDTASGRKTQELPGKAHIAHITGVLLRHDGERMRVHEDRLYQFDPLSARWKAPEGTEDIAFNSLATGGNGSVYAKSDDVVVDLTSPFMPHIEVKDLQSFSVAPDNRAALLSGKETQAILLTDMSPVIGDLTEKKT…	5139	1712
PmoICMP4468_AvrE1a_1	PmoICMP4468	AvrE	AvrE	AvrE	AvrE1	17	NA	147	GTGCATTCATCCTCGATCCACCGCAACACCGGAAGCATCATTCAGCCGCCAGTCCCGGCAAACACGAACGCTGCAACTGATCTACAGCAAAAAATCGAACAACCCAAACAACGCTCCTCCCACTCACTGAGCAGTGTCGGCAAGCGAGCGCTGAAGAACGTCAGCAAACTGTTCCAGAAATCCAAGGCACCGCAGCAGAAAGCGGCCACGCCTCCCACCGTAAAAAACGTCAAGCCTTCACAGCCCACTTCAAATGCGAAGACAGCCAAAGATAAAGCGCCTGTATCTCAGTTATCGAGCAATAGTCTTGATGACCTGGACGATACGCGCCAGCCAGTGATGCGTGCGGGGCATAGCGGCGCCAGCACTTCCGGCACCAAAGCCCAAGACCCGGACGAG…	MHSSSIHRNTGSIIQPPVPANTNAATDLQQKIEQPKQRSSHSLSSVGKRALKNVSKLFQKSKAPQQKAATPPTVKNVKPSQPTSNAKTAKDKAPVSQLSSNSLDDLDDTRQPVMRAGHSGASTSGTKAQDPDEPATIQSSRQSMMTRSNGGRFELKDEKLVRNSEPQGSIQLDAKGKPDFSTFNTPGLAPLLDSILATPRQTYLAHQSKDGVHGHQLLQANGHLLHLAQDDSSLALIRSSKEALHIEGKKPPAVKLEREDGNIHIDTASGRKTQELPGKAHIAHITGVLLRHDGERMRVHEDRLYQFDPLSARWKAPEGTEDIAFNSLATGGNGSVYAKSDDVVVDLTSPFMPHIEVKDLQSFSVAPDNRAALLSGKETQAILLTDMSPVIGDLTEKKT…	5145	1714
PmoICMP535_AvrE1a_1	PmoICMP535	AvrE	AvrE	AvrE	AvrE1	17	NA	147	GTGCATTCATCCTCGATCCACCGCAACACCGGAAGCATCATTCAGCCGCCAGTCCCGGCAAACACGAACGCTGCAACTGATCTACAGCAAAAAATCGAACAACCCAAACAACGCTCCTCCCACTCACTGAGCAGTGTCGGCAAGCGAGCGCTGAAGAACGTCAGCAAACTGTTCCAGAAATCCAAGGCACCGCAGCAGAAAGCGGCCACGCCTCCCACCGTAAAAAACGTCAAGCCTTCACAGCCCACTTCAAATGCGAAGACAGCCAAAGATAAAGCGCCTGTATCTCAGTTATCGAGCAATAGTCTTGATGACCTGGACGATACGCGCCAGCCAGTGATGCGTGCGGGGCATAGCGGCGCCAGCACTTCCGGCACCAAAGCCCAAGACCCGGACGAG…	MHSSSIHRNTGSIIQPPVPANTNAATDLQQKIEQPKQRSSHSLSSVGKRALKNVSKLFQKSKAPQQKAATPPTVKNVKPSQPTSNAKTAKDKAPVSQLSSNSLDDLDDTRQPVMRAGHSGASTSGTKAQDPDEPATIQSSRQSMMTRSNGGRFELKDEKLVRNSEPQGSIQLDAKGKPDFSTFNTPGLAPLLDSILATPRQTYLAHQSKDGVHGHQLLQANGHLLHLAQDDSSLALIRSSKEALHIEGKKPPAVKLEREDGNIHIDTASGRKTQELPGKAHIAHITGVLLRHDGERMRVHEDRLYQFDPLSARWKAPEGTEDIAFNSLATGGNGSVYAKSDDVVVDLTSPFMPHIEVKDLQSFSVAPDNRAALLSGKETQAILLTDMSPVIGDLTEKKT…	5145	1714
PmoICMP6941_AvrE1a_1	PmoICMP6941	AvrE	AvrE	AvrE	AvrE1	17	NA	147	GTGCATTCATCCTCGATCCACCGCAACACCGGAAGCATCATTCAGCCGCCAGTCCCGGCAAACACGAACGCTGCAACTGATCTACAGCAAAAAATCGAACAACCCAAACAACGCTCCTCCCACTCACTGAGCAGTGTCGGCAAGCGAGCGCTGAAGAACGTCAGCAAACTGTTCCAGAAATCCAAGGCACCGCAGCAGAAAGCGGCCACGCCTCCCACCGTAAAAAACGTCAAGCCTTCACAGCCCACTTCAAATGCGAAGACAGCCAAAGATAAAGCGCCTGTATCTCAGTTATCGAGCAATAGTCTTGATGACCTGGACGATACGCGCCAGCCAGTGATGCGTGCGGGGCATAGCGGCGCCAGCACTTCCGGCACCAAAGCCCAAGACCCGGACGAG…	MHSSSIHRNTGSIIQPPVPANTNAATDLQQKIEQPKQRSSHSLSSVGKRALKNVSKLFQKSKAPQQKAATPPTVKNVKPSQPTSNAKTAKDKAPVSQLSSNSLDDLDDTRQPVMRAGHSGASTSGTKAQDPDEPATIQSSRQSMMTRSNGGRFELKDEKLVRNSEPQGSIQLDAKGKPDFSTFNTPGLAPLLDSILATPRQTYLAHQSKDGVHGHQLLQANGHLLHLAQDDSSLALIRSSKEALHIEGKKPPAVKLEREDGNIHIDTASGRKTQELPGKAHIAHITGVLLRHDGERMRVHEDRLYQFDPLSARWKAPEGTEDIAFNSLATGGNGSVYAKSDDVVVDLTSPFMPHIEVKDLQSFSVAPDNRAALLSGKETQAILLTDMSPVIGDLTEKKT…	5145	1714
PmpFTRS_U7_AvrE1a_1	PmpFTRS_U7	AvrE	AvrE	AvrE	AvrE1	17	NA	148	GTGCATTCATCATCGATCCACCGCAACACCGGGAGCATCATTCAGCCGCCAGTCCCGGCAAACACGAACGCTGCAACGGATCTACAGCAAAAAATCGAACAACCCAAACAACGCTCCTCGCACTCACTGAGCAGTGTCGGCAAGCGAGCGCTGAAGAACGTCAGCAAACTGTTCCAGAAATCCAAGGCACCGCAGCAGAAAGCGGCCACGCCTCCCACCGTAAAAAACGTCAAGCCTTCACAGCCCACTTCAAATTCGAAGACAGCCAAAGACAAAGCGCCTGTATCTCAGTTATCGAGCAATAGTCTTGATGACCTGGAGGATACGCGCCAGCCAGTGACGCGTGCGGGGCATAGCGGCGCCAGCACTTCCGGCACCAAAGCCCAAGACCCGGACGAG…	MHSSSIHRNTGSIIQPPVPANTNAATDLQQKIEQPKQRSSHSLSSVGKRALKNVSKLFQKSKAPQQKAATPPTVKNVKPSQPTSNSKTAKDKAPVSQLSSNSLDDLEDTRQPVTRAGHSGASTSGTKAQDPDEPATLQSSRQSMMTRSNGGRFELKDEKLVRNSEPQGSIQLDAKGKPDFSTFNTPGLAPLLDSILATPMQTYLAHQSKDGVHGHQLLQANGHLLHLAQDDSSLALIRSSKEALHIEGKKPPAVKLEREDGNIHIDTASGRKTQELPGKAHIAHITGVLLRHGGERMRVHEDRLYQFDPLSARWKAPEGTEDIAFNNLATGGNGSVYAKSDDVVVDLTSPFMPHIEVKDLQSFSVAPDNRAALLSGKETQAILLTDMSPVIGDLTEKKT…	5163	1720
PmpICMP3897_AvrE1a_1	PmpICMP3897	AvrE	AvrE	AvrE	AvrE1	17	NA	149	GTGCATTCATCATCGATCCACCGCAACACCGGGAGCATCATTCAGCCGCCAGTCCCGGCAAACACGAACGCTGCAACGGATCTACAGCAAAAAATCGAACAACCCAAACAACGCTCCTCGCACTCACTGAGCAGTGTCGGCAAGCGAGCGCTGAAGAACGTCAGCAAACTGTTCCAGAAATCCAAGGCACCGCAGCAGAAAGCGGCCACGCCTCCCACCGTAAAAAACGTCAAGCCTTCACAGCCCACTTCAAATTCGAAGACAGCCAAAGACAAAGCGCCTGTATCTCAGTTATCGAGCAATAGTCTTGATGACCTGGAGGATACGCGCCAGCCAGTGACGCGTGCGGGGCATAGCGGCGCCAGCACTTCCGGCACCAAAGCCCAAGACCCGGACGAG…	MHSSSIHRNTGSIIQPPVPANTNAATDLQQKIEQPKQRSSHSLSSVGKRALKNVSKLFQKSKAPQQKAATPPTVKNVKPSQPTSNSKTAKDKAPVSQLSSNSLDDLEDTRQPVTRAGHSGASTSGTKAQDPDEPATLQSSRQSMMTRSNGGRFELKDEKLVRNSEPQGSIQLDAKGKPDFSTFNTPGLAPLLDSVLATPMQTYLAHQSKDGVHGHQLLQANGHLLHLAQDDSSLALIRSSKEALHIEGKKPPAVKLEREDGNIHIDTASGRKTQELPGKAHIAHITGVLLRHDGERMRVHEDRLYQFDPLSARWKAPEGTEDIAFNSLATGGNGSVYAKSDDVVVDLTSPFMPHIEVKDLQSFSVAPDNRAALLSGKETQAILLTDMSPVIGDLTEKKT…	5145	1714
PmpICMP568_AvrE1a_1	PmpICMP568	AvrE	AvrE	AvrE	AvrE1	17	NA	149	GTGCATTCATCATCGATCCACCGCAACACCGGGAGCATCATTCAGCCGCCAGTCCCGGCAAACACGAACGCTGCAACGGATCTACAGCAAAAAATCGAACAACCCAAACAACGCTCCTCGCACTCACTGAGCAGTGTCGGCAAGCGAGCGCTGAAGAACGTCAGCAAACTGTTCCAGAAATCCAAGGCACCGCAGCAGAAAGCGGCCACGCCTCCCACCGTAAAAAACGTCAAGCCTTCACAGCCCACTTCAAATTCGAAGACAGCCAAAGACAAAGCGCCTGTATCTCAGTTATCGAGCAATAGTCTTGATGACCTGGAGGATACGCGCCAGCCAGTGACGCGTGCGGGGCATAGCGGCGCCAGCACTTCCGGCACCAAAGCCCAAGACCCGGACGAG…	MHSSSIHRNTGSIIQPPVPANTNAATDLQQKIEQPKQRSSHSLSSVGKRALKNVSKLFQKSKAPQQKAATPPTVKNVKPSQPTSNSKTAKDKAPVSQLSSNSLDDLEDTRQPVTRAGHSGASTSGTKAQDPDEPATLQSSRQSMMTRSNGGRFELKDEKLVRNSEPQGSIQLDAKGKPDFSTFNTPGLAPLLDSVLATPMQTYLAHQSKDGVHGHQLLQANGHLLHLAQDDSSLALIRSSKEALHIEGKKPPAVKLEREDGNIHIDTASGRKTQELPGKAHIAHITGVLLRHDGERMRVHEDRLYQFDPLSARWKAPEGTEDIAFNSLATGGNGSVYAKSDDVVVDLTSPFMPHIEVKDLQSFSVAPDNRAALLSGKETQAILLTDMSPVIGDLTEKKT…	5145	1714
PmpICMP4983_AvrE1a_1	PmpICMP4983	AvrE	AvrE	AvrE	AvrE1	17	NA	150	GTGCATTCATCATCGATCCACCGCAACACCGGGAGCATCATTCAGCCGCCAGTCCCGGCAAACACGAACGCTGCAACGGATCTACAGCAAAAAATCGAACAACCCAAACAACGCTCCTCGCACTCACTGAGCAGTGTCGGCAAGCGAGCGCTGAAGAACGTCAGCAAACTGTTCCAGAAATCCAAGGCACCGCAGCAGAAAGCGGCCACGCCTCCCACCGTAAAAAACGTCAAGCCTTCACAGCCCACTTCAAATTCGAAGACAGCCAAAGACAAAGCGCCTGTATCTCAGTTATCGAGCAATAGTCTTGATGACCTGGAGGATACGCGCCAGCCAGTGACGCGTGCGGGGCATAGCGGCGCCAGCACTTCCGGCACCAAAGCCCAAGACCCGGACGAG…	MHSSSIHRNTGSIIQPPVPANTNAATDLQQKIEQPKQRSSHSLSSVGKRALKNVSKLFQKSKAPQQKAATPPTVKNVKPSQPTSNSKTAKDKAPVSQLSSNSLDDLEDTRQPVTRAGHSGASTSGTKAQDPDEPATLQSSRQSMMTRSNGGRFELKDEKLVRNSEPQGSIQLDAKGKPDFSTFNTPGLAPLLDSVLATPMQTYLAHQSKDGVHGHQLLQANGHLLHLAQDDSSLALIRSSKEALHIEGKKPPAVKLEREDGNIHIDTASGRKTQELPGKAHIAHITGVLLRHDGERMRVHEDRLYQFDPLSARWKAPEGTEDIAFNSLATGGNGSVYAKSDDVVVDLTSPFMPHIEVKDLQSFSVAPDNRAALLSGKETQAILLTDMSPVIGDLTEKKT…	3183	1060
PmpICMP4983_AvrE1a_2	PmpICMP4983	AvrE	AvrE	AvrE	AvrE1	17	NA	151	ATGGGCTTTACCGATAACAAAGCGCTGGAAAGCGGTTATGAAGCGGTCAAGACATTCCTCAAGTCATTCAAAAAAGCTGATCATGCGGTGAGCGTCAACATGCGCGCAGCCACAGGCAGCAAGGACCAGGCGGAACTGGCCGGGAAATTCAAAAGCATGCTCAAGCAACTGGAGCATGGCGACGATGAAATCGGGCTGCAACGCAGTTACGGACTGAACCTTACCACCCCGTTCATCATTCTTGCCGACAAGGCCACAGGAATATGGCCAACGGCAGGTACCACCGGCAACCGTAACTACATACTCAATGCCGAGCGTTGCGAGGGCGGCGTTACCCTGTACCTGATCAGCGAAGGTGCGGGAAACGTAAGCGGTGGCTTCGGTGCCGGCAAAGACTAC…	MGFTDNKALESGYEAVKTFLKSFKKADHAVSVNMRAATGSKDQAELAGKFKSMLKQLEHGDDEIGLQRSYGLNLTTPFIILADKATGIWPTAGTTGNRNYILNAERCEGGVTLYLISEGAGNVSGGFGAGKDYWPGFFDENHPARSVDVGNNRTLTPNFRLGVDVTATVAASQRAGVVFNVPDEDIDAFVDDLFEGKLNPLQVLKKAVDHETYQARRFNFDLTAGGTADLRSGINLTEDRDPDADPNSNSFSAVVRGGFAANITVNLMTYTDYSLTQKNDKTELREGGKNRPRFLNNATLGGQLRGQIGGTHTAPTGTPASAPGPTPASQSAANNLGVAVNFSAENRTVKRVKFRYNVAKPITTEGLGKLSKSLGEAFKDSTTKAKLAELADPLNARYA…	1920	639
PmyAZ84488_AvrE1a_1	PmyAZ84488	AvrE	AvrE	AvrE	AvrE1	17	NA	152	GTGCATTCATCATCGATCCACCGCAACACCGGGAGCATCATTCAGCCGCCAGTCCCGGCAAACACGAACGCTGCAACGGATCTACAGCAAAAAATCGAACAACCCAAACAACGCTCCTCGCACTCACTGAGCAGTGTCGGCAAGCGAGCGCTGAAGAACGTCAGCAAACTGTTCCAGAAATCCAAGGCACCGCAGCAGAAAGCGGCCACGCCTCCCACCGTAAAAAACGTCAAGCCTTCACAGCCCACTTCAAATTCGAAGACAGCCAAAGACAAAGCGCCTGTATCTCAGTTATCGAGCAATAGTCTTGATGACCTGGAGGATACGCGCCAGCCAGTGACGCGTGCGGGGCATAGCGGCGCCAGCACTTCCGGCACCAAAGCCCAAGACCCGGACGAG…	MHSSSIHRNTGSIIQPPVPANTNAATDLQQKIEQPKQRSSHSLSSVGKRALKNVSKLFQKSKAPQQKAATPPTVKNVKPSQPTSNSKTAKDKAPVSQLSSNSLDDLEDTRQPVTRAGHSGASTSGTKAQDPDEPATLQSSRQSMMTRSNGGRFELKDEKLVRNSEPQGSIQLDAKGKPDFSTFNTPGLAPLLDSILATPMQTYLAHQSKDGVHGHQLLQANGHLLHLAQDDSSLALIRSSKEALHIEGKKPPAVKLEREDGNIHIDTASGRKTQELPGKAHIAHITGVLLRHDGERMRVHEDRLYQFDPLSARWKAPEGTEDIAFNSLATGGNGSVYAKSDDVVVDLTSPFMPHIEVKDLQSFSVAPDNRAALLSGKETQAILLTDMSPVIGDLTEKKT…	5157	1718
PmyICMP11123_AvrE1a_1	PmyICMP11123	AvrE	AvrE	AvrE	AvrE1	17	NA	152	GTGCATTCATCATCGATCCACCGCAACACCGGGAGCATCATTCAGCCGCCAGTCCCGGCAAACACGAACGCTGCAACGGATCTACAGCAAAAAATCGAACAACCCAAACAACGCTCCTCGCACTCACTGAGCAGTGTCGGCAAGCGAGCGCTGAAGAACGTCAGCAAACTGTTCCAGAAATCCAAGGCACCGCAGCAGAAAGCGGCCACGCCTCCCACCGTAAAAAACGTCAAGCCTTCACAGCCCACTTCAAATTCGAAGACAGCCAAAGACAAAGCGCCTGTATCTCAGTTATCGAGCAATAGTCTTGATGACCTGGAGGATACGCGCCAGCCAGTGACGCGTGCGGGGCATAGCGGCGCCAGCACTTCCGGCACCAAAGCCCAAGACCCGGACGAG…	MHSSSIHRNTGSIIQPPVPANTNAATDLQQKIEQPKQRSSHSLSSVGKRALKNVSKLFQKSKAPQQKAATPPTVKNVKPSQPTSNSKTAKDKAPVSQLSSNSLDDLEDTRQPVTRAGHSGASTSGTKAQDPDEPATLQSSRQSMMTRSNGGRFELKDEKLVRNSEPQGSIQLDAKGKPDFSTFNTPGLAPLLDSILATPMQTYLAHQSKDGVHGHQLLQANGHLLHLAQDDSSLALIRSSKEALHIEGKKPPAVKLEREDGNIHIDTASGRKTQELPGKAHIAHITGVLLRHDGERMRVHEDRLYQFDPLSARWKAPEGTEDIAFNSLATGGNGSVYAKSDDVVVDLTSPFMPHIEVKDLQSFSVAPDNRAALLSGKETQAILLTDMSPVIGDLTEKKT…	5157	1718
PmyICMP11510_AvrE1a_1	PmyICMP11510	AvrE	AvrE	AvrE	AvrE1	17	NA	152	GTGCATTCATCATCGATCCACCGCAACACCGGGAGCATCATTCAGCCGCCAGTCCCGGCAAACACGAACGCTGCAACGGATCTACAGCAAAAAATCGAACAACCCAAACAACGCTCCTCGCACTCACTGAGCAGTGTCGGCAAGCGAGCGCTGAAGAACGTCAGCAAACTGTTCCAGAAATCCAAGGCACCGCAGCAGAAAGCGGCCACGCCTCCCACCGTAAAAAACGTCAAGCCTTCACAGCCCACTTCAAATTCGAAGACAGCCAAAGACAAAGCGCCTGTATCTCAGTTATCGAGCAATAGTCTTGATGACCTGGAGGATACGCGCCAGCCAGTGACGCGTGCGGGGCATAGCGGCGCCAGCACTTCCGGCACCAAAGCCCAAGACCCGGACGAG…	MHSSSIHRNTGSIIQPPVPANTNAATDLQQKIEQPKQRSSHSLSSVGKRALKNVSKLFQKSKAPQQKAATPPTVKNVKPSQPTSNSKTAKDKAPVSQLSSNSLDDLEDTRQPVTRAGHSGASTSGTKAQDPDEPATLQSSRQSMMTRSNGGRFELKDEKLVRNSEPQGSIQLDAKGKPDFSTFNTPGLAPLLDSILATPMQTYLAHQSKDGVHGHQLLQANGHLLHLAQDDSSLALIRSSKEALHIEGKKPPAVKLEREDGNIHIDTASGRKTQELPGKAHIAHITGVLLRHDGERMRVHEDRLYQFDPLSARWKAPEGTEDIAFNSLATGGNGSVYAKSDDVVVDLTSPFMPHIEVKDLQSFSVAPDNRAALLSGKETQAILLTDMSPVIGDLTEKKT…	5157	1718
PmyICMP7120_AvrE1a_1	PmyICMP7120	AvrE	AvrE	AvrE	AvrE1	17	NA	152	GTGCATTCATCATCGATCCACCGCAACACCGGGAGCATCATTCAGCCGCCAGTCCCGGCAAACACGAACGCTGCAACGGATCTACAGCAAAAAATCGAACAACCCAAACAACGCTCCTCGCACTCACTGAGCAGTGTCGGCAAGCGAGCGCTGAAGAACGTCAGCAAACTGTTCCAGAAATCCAAGGCACCGCAGCAGAAAGCGGCCACGCCTCCCACCGTAAAAAACGTCAAGCCTTCACAGCCCACTTCAAATTCGAAGACAGCCAAAGACAAAGCGCCTGTATCTCAGTTATCGAGCAATAGTCTTGATGACCTGGAGGATACGCGCCAGCCAGTGACGCGTGCGGGGCATAGCGGCGCCAGCACTTCCGGCACCAAAGCCCAAGACCCGGACGAG…	MHSSSIHRNTGSIIQPPVPANTNAATDLQQKIEQPKQRSSHSLSSVGKRALKNVSKLFQKSKAPQQKAATPPTVKNVKPSQPTSNSKTAKDKAPVSQLSSNSLDDLEDTRQPVTRAGHSGASTSGTKAQDPDEPATLQSSRQSMMTRSNGGRFELKDEKLVRNSEPQGSIQLDAKGKPDFSTFNTPGLAPLLDSILATPMQTYLAHQSKDGVHGHQLLQANGHLLHLAQDDSSLALIRSSKEALHIEGKKPPAVKLEREDGNIHIDTASGRKTQELPGKAHIAHITGVLLRHDGERMRVHEDRLYQFDPLSARWKAPEGTEDIAFNSLATGGNGSVYAKSDDVVVDLTSPFMPHIEVKDLQSFSVAPDNRAALLSGKETQAILLTDMSPVIGDLTEKKT…	5157	1718
PmyICMP7118_AvrE1a_1	PmyICMP7118	AvrE	AvrE	AvrE	AvrE1	17	NA	153	GTGCATTCATCATCGATCCACCGCAACACCGGGAGCATCATTCAGCCGCCAGTCCCGGCAAACACGAACGCTGCAACGGATCTACAGCAAAAAATCGAACAACCCAAACAACGCTCCTCGCACTCACTGAGCAGTGTCGGCAAGCGAGCGCTGAAGAACGTCAGCAAACTGTTCCAGAAATCCAAGGCACCGCAGCAGAAAGCGGCCACGCCTCCCACCGTAAAAAACGTCAAGCCTTCACAGCCCACTTCAAATTCGAAGACAGCCAAAGACAAAGCGCCTGTATCTCAGTTATCGAGCAATAGTCTTGATGACCTGGAGGATACGCGCCAGCCAGTGACGCGTGCGGGGCATAGCGGCGCCAGCACTTCCGGCACCAAAGCCCAAGACCCGGACGAG…	MHSSSIHRNTGSIIQPPVPANTNAATDLQQKIEQPKQRSSHSLSSVGKRALKNVSKLFQKSKAPQQKAATPPTVKNVKPSQPTSNSKTAKDKAPVSQLSSNSLDDLEDTRQPVTRAGHSGASTSGTKAQDPDEPATLQSSRQSMMTRSNGGRFELKDEKLVRNSEPQGSIQLDAKGKPDFSTFNTPGLAPLLDSILATPMQTYLAHQSKDGVHGHQLLQANGHLLHLAQDDSSLALIRSSKEALHIEGKKPPAVKLEREDGNIHIDTASGRKTQELPGKAHIAHITGVLLRHDGERMRVHEDRLYQFDPLSARWKAPEGTEDIAFNSLATGGNGSVYAKSDDVVVDLTSPFMPHIEVKDLQSFSVAPDNRAALLSGKETQAILLTDMSPVIGDLTEKKT…	5169	1722
PneICMP13781_AvrE1a_1	PneICMP13781	AvrE	AvrE	AvrE	AvrE1	17	NA	154	ATGGGCTTTACCGATAACAAAGCGCTGGAAAGCGGTTATGAAGCGGTCAAGACATTCCTCAAGTCATTCAAAAAAGCTGATCATGCGGTGAGCGTCAACATGCGCGCAGCCACAGGCAGCAAGGACCAGGCGGAACTGGCCGGGAAATTCAAAAGCATGCTCAAGCAACTGGAGCATGGCGACGATGAAATCGGGCTGCAACGCAGTTACGGACTGAACCTTACCACCCCGTTCATCATTCTTGCCGACAAGGCCACAGGAATATGGCCAACGGCAGGTACCACCGGCAACCGTAACTACATACTCAATGCCGAGCGTTGCGAGGGCGGCGTTACCCTGTACCTGATCAGCGAAGGTGCGGGAAACGTAAGCGGTGGCTTCGGTGCCGGCAAAGACTAC…	MGFTDNKALESGYEAVKTFLKSFKKADHAVSVNMRAATGSKDQAELAGKFKSMLKQLEHGDDEIGLQRSYGLNLTTPFIILADKATGIWPTAGTTGNRNYILNAERCEGGVTLYLISEGAGNVSGGFGAGKDYWPGFFDENHPARSVDVGNNRTLTPNFRLGVDVTATVAASQRAGVVFNVPDEDIDAFVDDLFEGKLNPLQVLKKAVDHETYQARRFNFDLTAGGTADLRSGINLTEDRDPDADPNSNSFSAVVRGGFAANITVNLMTYTDYSLTQKNDKTELREGGKNRPRFLNNATLGGQLRGQIGGTHTAPTGTPASAPGPTPASQSAANNLGVAVNFSVENRTVKRVKFRYNVAKPITTEGLGKLSKSLGEAFKDSTTKAKLAELADPLNARYA…	1920	639
PneICMP13781_AvrE1a_2	PneICMP13781	AvrE	AvrE	AvrE	AvrE1	17	NA	155	GTGCATTCATCATCGATCCACCGCAACACCGGGAGCATCATTCAGCCGCCAGTCCCGGCAAACACGAACGCTGCAACGGATCTACAGCAAAAAATCGAACAACCCAAACAACGCTCCTCGCACTCACTGAGCAGTGTCGGCAAGCGAGCGCTGAAGAACGTCAGCAAACTGTTCCAGAAATCCAAGGCACCGCAGCAGAAAGCGGCCACGCCTCCCACCGTAAAAAACGTCAAGCCTTCACAGCCCACTTCAAATTCGAAGACAGCCAAAGACAAAGCGCCTGTATCTCAGTTATCGAGCAATAGTCTTGATGACCTGGAGGATACGCGCCAGCCAGTGACGCGTGCGGGGCATAGCGGCGCCAGCACTTCCGGCACCAAAGCCCAAGACCCGGACGAG…	MHSSSIHRNTGSIIQPPVPANTNAATDLQQKIEQPKQRSSHSLSSVGKRALKNVSKLFQKSKAPQQKAATPPTVKNVKPSQPTSNSKTAKDKAPVSQLSSNSLDDLEDTRQPVTRAGHSGASTSGTKAQDPDEPATLQSSRQSMMTRSNGGRFELKDEKLVRNSEPQGSIQLDAKGKPDFSTFNTPGLAPLLDSILATPMQTYLAHQSKDGVHGHQLLQANGHLLHLAQDDSSLALIRSSKEALHIEGKKPPAVKLEREDGNIHIDTASGRKTQELPGKAHIAHITGVLLRHDGERMRVHEDRLYQFDPLSARWKAPEGTEDIAFNSLATGGNGSVYAKSDDVVVDLTSPFMPHIEVKDLQSFSVAPDNRAALLSGKETQAILLTDMSPVIGDLTEKKT…	3180	1059
PneICMP13786_AvrE1a_1	PneICMP13786	AvrE	AvrE	AvrE	AvrE1	17	NA	156	GTGCATTCATCATCGATCCACCGCAACACCGGGAGCATCATTCAGCCGCCAGTCCCGGCAAACACGAACGCTGCAACGGATCTACAGCAAAAAATCGAACAACCCAAACAACGCTCCTCGCACTCACTGAGCAGTGTCGGCAAGCGAGCGCTGAAGAACGTCAGCAAACTGTTCCAGAAATCCAAGGCACCGCAGCAGAAAGCGGCCACGCCTCCCACCGTAAAAAACGTCAAGCCTTCACAGCCCACTTCAAATTCGAAGACAGCCAAAGACAAAGCGCCTGTATCTCAGTTATCGAGCAATAGTCTTGATGACCTGGAGGATACGCGCCAGCCAGTGACGCGTGCGGGGCATAGCGGCGCCAGCACTTCCGGCACCAAAGCCCAAGACCCGGACGAG…	MHSSSIHRNTGSIIQPPVPANTNAATDLQQKIEQPKQRSSHSLSSVGKRALKNVSKLFQKSKAPQQKAATPPTVKNVKPSQPTSNSKTAKDKAPVSQLSSNSLDDLEDTRQPVTRAGHSGASTSGTKAQDPDEPATLQSSRQSMMTRSNGGRFELKDEKLVRNSEPQGSIQLDAKGKPDFSTFNTPGLAPLLDSILATPMQTYLAHQSKDGVHGHQLLQANGHLLHLAQDDSSLALIRSSKEALHIEGKKPPAVKLEREDGNIHIDTASGRKTQELPGKAHIAHITGVLLRHDDERMRVHEDRLYQFDPLSARWKAPEGTEDIAFNSLATGGNGSVYAKSDDVVVDLTSPFMPHIEVKDLQSFSVAPDNRAALLSGKETQAILLTDMSPVIGDLTEKKT…	5145	1714
PneICMP16943_AvrE1a_1	PneICMP16943	AvrE	AvrE	AvrE	AvrE1	17	NA	157	GTGCATTCATCATCGATCCACCGCAACACCGGGAGCATCATTCAGCCGCCAGTCCCGGCAAACACGAACGCTGCAACGGATCTACAGCAAAAAATCGAACAACCCAAACAACGCTCCTCGCACTCACTGAGCAGTGTCGGCAAGCGAGCGCTGAAGAACGTCAGCAAACTGTTCCAGAAATCCAAGGCACCGCAGCAGAAAGCGGCCACGCCTCCCACCGTAAAAAACGTCAAGCCTTCACAGCCCACTTCAAATTCGAAGACAGCCAAAGACAAAGCGCCTGTATCTCAGTTATCGAGCAATAGTCTTGATGACCTGGAGGATACGCGCCAGCCAGTGACGCGTGCGGGGCATAGCGGCGCCAGCACTTCCGGCACCAAAGCCCAAGACCCGGACGAG…	MHSSSIHRNTGSIIQPPVPANTNAATDLQQKIEQPKQRSSHSLSSVGKRALKNVSKLFQKSKAPQQKAATPPTVKNVKPSQPTSNSKTAKDKAPVSQLSSNSLDDLEDTRQPVTRAGHSGASTSGTKAQDPDEPATLQSSRQSMMTRSNGGRFELKDEKLVRNSEPQGSIQLDAKGKPDFSTFNTPGLAPLLDSILATPMQTYLAHQSKDGVHGHQLLQANGHLLHLAQDDSSLALIRSSKEALHIEGKKPPAVKLEREDGNIHIDTASGRKTQELPGKAHIAHITGVLLRHDGERMRVHEDRLYQFDPLSARWKAPEGTEDIAFNSLATGGNGSVYAKSDDVVVDLTSPFMPHIEVKDLQSFSVAPDNRAALLSGKETQAILLTDMSPVIGDLTEKKT…	5157	1718
PneICMP16944_AvrE1a_1	PneICMP16944	AvrE	AvrE	AvrE	AvrE1	17	NA	158	GTGCATTCATCATCGATCCACCGCAACACCGGGAGCATCATTCAGCCGCCAGTCCCGGCAAACACGAACGCTGCAACGGATCTACAGCAAAAAATCGAACAACCCAAACAACGCTCCTCGCACTCACTGAGCAGTGTCGGCAAGCGAGCGCTGAAGAACGTCAGCAAACTGTTCCAGAAATCCAAGGCACCGCAGCAGAAAGCGGCCACGCCTCCCACCGTAAAAAACGTCAAGCCTTCACAGCCCACTTCAAATTCGAAGACAGCCAAAGACAAAGCGCCTGTATCTCAGTTATCGAGCAATAGTCTTGATGACCTGGAGGATACGCGCCAGCCAGTGACGCGTGCGGGGCATAGCGGCGCCAGCACTTCCGGCACCAAAGCCCAAGACCCGGACGAG…	MHSSSIHRNTGSIIQPPVPANTNAATDLQQKIEQPKQRSSHSLSSVGKRALKNVSKLFQKSKAPQQKAATPPTVKNVKPSQPTSNSKTAKDKAPVSQLSSNSLDDLEDTRQPVTRAGHSGASTSGTKAQDPDEPATLQSSRQSMMTRSNGGRFELKDEKLVRNSEPQGSIQLDAKGKPDFSTFNTPGLAPLLDSILATPMQTYLAHQSKDGVHGHQLLQANGHLLHLAQDDSSLALIRSSKEALHIEGKKPPAVKLEREDGNIHIDTASGRKTQELPGKAHIAHITGVLLRHDGERMRVHEDRLYQFDPLSARWKAPEGTEDIAFNSLATGGNGSVYAKSDDVVVDLTSPFMPHIEVKDLQSFSVAPDNRAALLSGKETQAILLTDMSPVIGDLTEKKT…	5169	1722
PpeICMP3706_AvrE1a_1	PpeICMP3706	AvrE	AvrE	AvrE	AvrE1	17	NA	159	GTGCATTCATCATCGATCCACCGCAACACCGGAAGCATCATTCAGCCGCCAGTCCCGGCAAATACGAACGCTGCAACTGATCTACAGCAAAAAACCGAACAACCCAAGCAGCGCTCCTCGCACTCACTGAGCAGTGTCGGCAAGCGAGCGCTGAAGAACGTCAGCAAACTGTTCCAGAAATCCAAGGCACCGCAGCAGAAAGCGGCCACGCCTCCCACCGTAAAAAACGTCAAGCCTTCACAGCCCACTTCAAATGCGAAGACAGCCAAAGATAAAGCGCCTGTATCTCAGTTATCGAGCAATAGTCTTGATGACCTGGACGATACGCGCCAGCCAGTGACGCGTGCGGGGCATAGCGGCGCCAGCACTTCCGGCACCAAAGCCCAAGACCCGGACGAG…	MHSSSIHRNTGSIIQPPVPANTNAATDLQQKTEQPKQRSSHSLSSVGKRALKNVSKLFQKSKAPQQKAATPPTVKNVKPSQPTSNAKTAKDKAPVSQLSSNSLDDLDDTRQPVTRAGHSGASTSGTKAQDPDEPATLQSSRQSMMTRSNGGRFELKDEKLVRNSEPQGSIQLDAKGKPDFSTFNTPGLAPLLDSILATPRQTYLAHQSKDGVHGHQLLQANGHLLHLAQDDSSLALIRSSKEALHIEGKKPPAVKLEREDGNIHVDTASGRKTQELPGKAHIAHITGVLLRHDGERMRVHEDRLYQFDPLSARWKAPEGTEDIAFNSLATGGNGSVYAKSDDVVVDLTSPFMPHVEVKDLQSFSVAPDNRAALLSGKETQAILLTDMSPVIGDLTEKKT…	5145	1714
PvrICMP11296_AvrE1a_1	PvrICMP11296	AvrE	AvrE	AvrE	AvrE1	17	NA	159	GTGCATTCATCATCGATCCACCGCAACACCGGAAGCATCATTCAGCCGCCAGTCCCGGCAAATACGAACGCTGCAACTGATCTACAGCAAAAAACCGAACAACCCAAGCAGCGCTCCTCGCACTCACTGAGCAGTGTCGGCAAGCGAGCGCTGAAGAACGTCAGCAAACTGTTCCAGAAATCCAAGGCACCGCAGCAGAAAGCGGCCACGCCTCCCACCGTAAAAAACGTCAAGCCTTCACAGCCCACTTCAAATGCGAAGACAGCCAAAGATAAAGCGCCTGTATCTCAGTTATCGAGCAATAGTCTTGATGACCTGGACGATACGCGCCAGCCAGTGACGCGTGCGGGGCATAGCGGCGCCAGCACTTCCGGCACCAAAGCCCAAGACCCGGACGAG…	MHSSSIHRNTGSIIQPPVPANTNAATDLQQKTEQPKQRSSHSLSSVGKRALKNVSKLFQKSKAPQQKAATPPTVKNVKPSQPTSNAKTAKDKAPVSQLSSNSLDDLDDTRQPVTRAGHSGASTSGTKAQDPDEPATLQSSRQSMMTRSNGGRFELKDEKLVRNSEPQGSIQLDAKGKPDFSTFNTPGLAPLLDSILATPRQTYLAHQSKDGVHGHQLLQANGHLLHLAQDDSSLALIRSSKEALHIEGKKPPAVKLEREDGNIHVDTASGRKTQELPGKAHIAHITGVLLRHDGERMRVHEDRLYQFDPLSARWKAPEGTEDIAFNSLATGGNGSVYAKSDDVVVDLTSPFMPHVEVKDLQSFSVAPDNRAALLSGKETQAILLTDMSPVIGDLTEKKT…	5145	1714
PvrICMP3272_AvrE1a_1	PvrICMP3272	AvrE	AvrE	AvrE	AvrE1	17	NA	159	GTGCATTCATCATCGATCCACCGCAACACCGGAAGCATCATTCAGCCGCCAGTCCCGGCAAATACGAACGCTGCAACTGATCTACAGCAAAAAACCGAACAACCCAAGCAGCGCTCCTCGCACTCACTGAGCAGTGTCGGCAAGCGAGCGCTGAAGAACGTCAGCAAACTGTTCCAGAAATCCAAGGCACCGCAGCAGAAAGCGGCCACGCCTCCCACCGTAAAAAACGTCAAGCCTTCACAGCCCACTTCAAATGCGAAGACAGCCAAAGATAAAGCGCCTGTATCTCAGTTATCGAGCAATAGTCTTGATGACCTGGACGATACGCGCCAGCCAGTGACGCGTGCGGGGCATAGCGGCGCCAGCACTTCCGGCACCAAAGCCCAAGACCCGGACGAG…	MHSSSIHRNTGSIIQPPVPANTNAATDLQQKTEQPKQRSSHSLSSVGKRALKNVSKLFQKSKAPQQKAATPPTVKNVKPSQPTSNAKTAKDKAPVSQLSSNSLDDLDDTRQPVTRAGHSGASTSGTKAQDPDEPATLQSSRQSMMTRSNGGRFELKDEKLVRNSEPQGSIQLDAKGKPDFSTFNTPGLAPLLDSILATPRQTYLAHQSKDGVHGHQLLQANGHLLHLAQDDSSLALIRSSKEALHIEGKKPPAVKLEREDGNIHVDTASGRKTQELPGKAHIAHITGVLLRHDGERMRVHEDRLYQFDPLSARWKAPEGTEDIAFNSLATGGNGSVYAKSDDVVVDLTSPFMPHVEVKDLQSFSVAPDNRAALLSGKETQAILLTDMSPVIGDLTEKKT…	5145	1714
PphHB10Y_AvrE1a_1	PphHB10Y	AvrE	AvrE	AvrE	AvrE1	17	NA	160	GTGCATTCATCCTCGATCCACCGCAACACCGGATGCATCATTCAGCCGCCAGCCCCGGCAAACACGAACGCTGCAACTGATCTACAGCAAAAAATCGAACAACCCAAACAACGCTCCTCCCACTCACTGAGCAGTGTCGGCAAGCGAGCGCTGAAGAACGTCAGCAAACTGTTCCAGAAATCCAAGGCACCGCAGCAGAAAGCGGCCACGCCTCCCACCGTAAAAAACGTCAAGCCTTCACAGCCCACTCCAAATGCGAAGACAGCCAAAGATAAAGCGCCTGTATCTCAGTTATCGAGCAATAGTCTTGATGACCTGGACGATACGCGCCAGCCAGTAACGCGTGCGGGGCATAGCGGCGCCAGCACTTGTGGCACCAAAGCCCAAGACCCGGACGAG…	MHSSSIHRNTGCIIQPPAPANTNAATDLQQKIEQPKQRSSHSLSSVGKRALKNVSKLFQKSKAPQQKAATPPTVKNVKPSQPTPNAKTAKDKAPVSQLSSNSLDDLDDTRQPVTRAGHSGASTCGTKAQDPDEPATLQSSRQSMMTRSNGGRFELKDEKLVRNSEPQGSIQLDAKGKPDFSTFNTPGLAPLLDSILATPRQTYLAHQSKDGVHGHQLLQANGHLLHLAQDDSSLALIRSSKEALHIEGKKPPAVKLEREDGNIHIDTASGRKTQELPGKAHIAHITGVLLRHDGERMRVHEDRLYQFDPLSARWKAPEGTEDIAFNSLATGGKGSVYAKSDDVVVDLTSPFMPHIEVKDLQSFSVAPDNRAALLSGKETQAILLTDMSPVIGDLTEKKT…	5220	1739
PphICMP5059_AvrE1a_1	PphICMP5059	AvrE	AvrE	AvrE	AvrE1	17	NA	161	GTGCATTCATCCTCGATCCACCGCAACACCGGATGCATCATTCAGCCGCCAGCCCCGGCAAACACGAACGCTGCAACTGATCTACAGCAAAAAATCGAACAACCCAAACAACGCTCCTCCCACTCACTGAGCAGTGTCGGCAAGCGAGCGCTGAAGAACGTCAGCAAACTGTTCCAGAAATCCAAGGCACCGCAGCAGAAAGCGGCCACGCCTCCCACCGTAAAAAACGTCAAGCCTTCACAGCCCACTCCAAATGCGAAGACAGCCAAAGATAAAGCGCCTGTATCTCAGTTATCGAGCAATAGTCTTGATGACCTGGACGATACGCGCCAGCCAGTAACGCGTGCGGGGCATAGCGGCGACAGCACTTCTGGCACCAAAGCCCAAGACCCGGACGAG…	MHSSSIHRNTGCIIQPPAPANTNAATDLQQKIEQPKQRSSHSLSSVGKRALKNVSKLFQKSKAPQQKAATPPTVKNVKPSQPTPNAKTAKDKAPVSQLSSNSLDDLDDTRQPVTRAGHSGDSTSGTKAQDPDEPATLQSSRQSMMTRSNGGRFELKDEKLVRNSEPQGSIQLDAKGKPDFSTFNTPGLAPLLDSILATPRQTYLAHQSKDGVHGHQLLQANGHLLHLAQDDSSLALIRSSKEALHIEGKKPPAVKLEREDGNIHIDTASGRKTQELPGKAHIAHITGVLLRHDGERMRVHEDRLYQFDPLSARWKAPEGTEDIAFNSLATGGNGSVYAKSDDVVVDLTSPFMPHIEVKDLQSFSVAPDNRAALLSGKETQAILLTDMSPVIGDLTEKKT…	5145	1714
PphK4_AvrE1a_1	PphK4	AvrE	AvrE	AvrE	AvrE1	17	NA	162	GTGCATTCATCCTCGATCCACCGCAACACCGGATGCATCATTCAGCCGCCAGCCCCGGCAAACACGAACGCTGCAACTGATCTACAGCAAAAAATCGAACAACCCAAACAACGCTCCTCCCACTCACTGAGCAGTGTCGGCAAGCGAGCGCTGAAGAACGTCAGCAAACTGTTCCAGAAATCCAAGGCACCGCAGCAGAAAGCGGCCACGCCTCCCACCGTAAAAAACGTCAAGCCTTCACAGCCCACTCCAAATGCGAAGACAGCCAAAGATAAAGCGCCTGTATCTCAGTTATCGAGCAATAGTCTTGATGACCTGGACGATACGCGCCAGCCAGTAACGCGTGCGGGGCATAGCGGCGCCAGCACTTGTGGCACCAAAGCCCAAGACCCGGACGAG…	MHSSSIHRNTGCIIQPPAPANTNAATDLQQKIEQPKQRSSHSLSSVGKRALKNVSKLFQKSKAPQQKAATPPTVKNVKPSQPTPNAKTAKDKAPVSQLSSNSLDDLDDTRQPVTRAGHSGASTCGTKAQDPDEPATLQSSRQSMMTRSNGGRFELKDEKLVRNSEPQGSIQLDAKGKPDFSTFNTPGLAPLLDSILATPRQTYLAHQSKDGVHGHQLLQANGHLLHLAQDDSSLALIRSSKEALHIEGKKPPAVKLEREDGNIHIDTASGRKTQELPGKAHIAHITGVLLRHDGERMRVHEDRLYQFDPLSARWKAPEGTEDIAFNSLATGGKGSVYAKSDDVVVDLTSPFMPHIEVKDLQSFSVAPDNRAALLSGKETQAILLTDMSPVIGDLTEKKT…	5145	1714
PphNPS3121_AvrE1a_1	PphNPS3121	AvrE	AvrE	AvrE	AvrE1	17	119	163	GTGGTACGCGGCGGATTCGCGGCGAACATCACCGTTAACCTGATGACCTACACCGATAACTCGTTGACCCAGAAAAACGACAAGACCAAGTTGCGCGAAGGCGGCAAGAACCGCCCGCGTTTTCTCAACAACGCAACGCTTGGCGGGCAGCTTCGCGGGCAGATCGGCGGCACCCGCACGGCCCCCACAGGCACACCGGCCTCCGCCCCGGGACCGACGCTCGCGTCACAGTCAGCCGCCAACAATCTGGGAGTAGCGGTCAATTTCAGCGTAGAGAACAGGACTGTCAAACGGGTCAAGTTTCGCTATAACGTCGCCAAGCCGATAACCACCGAAGGTTTGGGCAAGCTGTCTAAAAGCCTCGGCGAGGCATTCAAGGACAGCACGACCAAAGCAAAA…	MVRGGFAANITVNLMTYTDNSLTQKNDKTKLREGGKNRPRFLNNATLGGQLRGQIGGTRTAPTGTPASAPGPTLASQSAANNLGVAVNFSVENRTVKRVKFRYNVAKPITTEGLGKLSKSLGEAFKDSTTKAKLAELADPLNARYAGKKPDEVIQAHLDGLEELFADTQWQNDKQYKALRGLKRGAVEHRASVNKHSVMDNARFETSKTNLSGLSSESILTKIMGSVREASAPGNAARVAEFMRQDPKLRAMLKDMEGSIGTLARVRLEPKDSLVDKIDEGSLDGTMTQSDLSALLRDRNQMRIKRLVVFHTATQAENFTSPTPLVSYNSGANMSVTKTLGRINFIYGADQDKPIGYTFDGELSRPSASLKEAASKLKQEGFELKS	1161	386
PphNPS3121_AvrE1a_2	PphNPS3121	AvrE	AvrE	AvrE	AvrE1	17	NA	164	GTGCATTCATCCTCGATCCACCGCAACACCGGATGCATCATTCAGCCGCCAGCCCCGGCAAACACGAACGCTGCAACTGATCTACAGCAAAAAATCGAACAACCCAAACAACGCTCCTCCCACTCACTGAGCAGTGTCGGCAAGCGAGCGCTGAAGAACGTCAGCAAACTGTTCCAGAAATCCAAGGCACCGCAGCAGAAAGCGGCCACGCCTCCCACCGTAAAAAACGTCAAGCCTTCACAGCCCACTCCAAATGCGAAGACAGCCAAAGATAAAGCGCCTGTATCTCAGTTATCGAGCAATAGTCTTGATGACCTGGACGATACGCGCCAGCCAGTAACGCGTGCGGGGCATAGCGGCGCCAGCACTTGTGGCACCAAAGCCCAAGACCCGGACGAG…	MHSSSIHRNTGCIIQPPAPANTNAATDLQQKIEQPKQRSSHSLSSVGKRALKNVSKLFQKSKAPQQKAATPPTVKNVKPSQPTPNAKTAKDKAPVSQLSSNSLDDLDDTRQPVTRAGHSGASTCGTKAQDPDEPATLQSSRQSMMTRSNGGRFELKDEKLVRNSEPQGSIQLDAKGKPDFSTFNTPGLAPLLDSILATPRQTYLAHQSKDGVHGHQLLQANGHLLHLAQDDSSLALIRSSKEALHIEGKKPPAVKLEREDGNIHIDTASGRKTQELPGKAHIAHITGVLLRHDGERMRVHEDRLYQFDPLSARWKAPEGTEDIAFNSLATGGKGSVYAKSDDVVVDLTSPFMPHIEVKDLQSFSVAPDNRAALLSGKETQAILLTDMSPVIGDLTEKKT…	4029	1342
PphY5_2_AvrE1a_1	PphY5_2	AvrE	AvrE	AvrE	AvrE1	17	119	165	GTGGTACGCGGCGGATTCGCGGCGAACATCACCGTTAACCTGATGACCTACACCGATAACTCGTTGACCCAGAAAAACGACAAGACCAAGTTACGCGAAGGCGGCAAGAACCGCCCGCGTTTTCTCAACAACGCAACGCTTGGCGGGCAGCTTCGCGGGCAGATCGGCGGCACCCGCACGGCCCCCACAGGCACACCGGCCTCCGCCCCGGGACCGACGCTCGCGTCACAGTCAGCCGCCAACAATCTGGGAGTAGCGGTCAATTTCAGCGTAGAGAACAGGACTGTCAAACGGGTCAAGTTTCGCTATAACGTCGCCAAGCCGATAACCACCGAAGGTTTGGGCAAGCTGTCTAAAAGCCTCGGCGAGGCATTCAAGGACAGCACGACCAAAGCAAAA…	MVRGGFAANITVNLMTYTDNSLTQKNDKTKLREGGKNRPRFLNNATLGGQLRGQIGGTRTAPTGTPASAPGPTLASQSAANNLGVAVNFSVENRTVKRVKFRYNVAKPITTEGLGKLSKSLGEAFKDSTTKAKLAELADPLNARYAGKKPDEVIQAHLDGLEELFADTQWQNDKQYKALRGLKRGAVEHRASVNKHSVMDNARFETSKTNLSGLSSESILTKIMGSVREASAPGNAARVAEFMRQDPKLRAMLKDMEGSIGTLARVRLEPKDSLVDKIDEGSLDGTMTQSDLSALLRDRNQMRIKRLVVFHTATQAENFTSPTPLVSYNSGANMSVTKTLGRINFIYGADQDKPIGYTFDGELSRPSASLKEAASKLKQEGFELKS	1161	386
PreICMP16945_AvrE1a_1	PreICMP16945	AvrE	AvrE	AvrE	AvrE1	17	NA	166	GTGCATTCATCATCGATCCACCGCAACACCGGGAGCATCATTCAGCCGCCAGTCCCGGCAAACACGAACGCTGCAACGGATCTACAGCAAAAAATCGAACAACCCAAACAACGCTCCTCGCACTCACTGAGCAGTGTCGGCAAGCGAGCGCTGAAGAACGTCAGCAAACTGTTCCAGAAATCCAAGGCACCGCAGCAGAAAGCGGCCACGCCTCCCACCGTAAAAAACGTCAAGCCTTCACAGCCCACTTCAAATTCGAAGACAGCCAAAGACAAAGCGCCTGTATCTCAGTTATCGAGCAATAGTCTTGATGACCTGGAGGATACGCGCCAGCCAGTGACGCGTGCGGGGCATAGCGGCGCCAGCACTTCCGGCACCAAAGCCCAAGACCCGGACGAG…	MHSSSIHRNTGSIIQPPVPANTNAATDLQQKIEQPKQRSSHSLSSVGKRALKNVSKLFQKSKAPQQKAATPPTVKNVKPSQPTSNSKTAKDKAPVSQLSSNSLDDLEDTRQPVTRAGHSGASTSGTKAQDPDEPATLQSSRQSMMTRSNGGRFELKDEKLVRNSEPQGSIQLDAKGKPDFSTFNTPGLAPLLDSILATPMQTYLAHQSKDGVHGHQLLQANGHLLHLAQDDSSLALIRSSKEALHIEGKKPPAVKLEREDGNIHIDTASGRKTQELPGKAHIAHITGVLLRHDGERMRVHEDRLYQFDPLSARWKAPEGTEDIAFNSLATGGNGSVYAKSDDVVVDLTSPFMPHIEVKDLQSFSVAPDNRAALLSGKETQAILLTDMSPVIGDLTEKKT…	5157	1718
PreICMP16947_AvrE1a_1	PreICMP16947	AvrE	AvrE	AvrE	AvrE1	17	NA	166	GTGCATTCATCATCGATCCACCGCAACACCGGGAGCATCATTCAGCCGCCAGTCCCGGCAAACACGAACGCTGCAACGGATCTACAGCAAAAAATCGAACAACCCAAACAACGCTCCTCGCACTCACTGAGCAGTGTCGGCAAGCGAGCGCTGAAGAACGTCAGCAAACTGTTCCAGAAATCCAAGGCACCGCAGCAGAAAGCGGCCACGCCTCCCACCGTAAAAAACGTCAAGCCTTCACAGCCCACTTCAAATTCGAAGACAGCCAAAGACAAAGCGCCTGTATCTCAGTTATCGAGCAATAGTCTTGATGACCTGGAGGATACGCGCCAGCCAGTGACGCGTGCGGGGCATAGCGGCGCCAGCACTTCCGGCACCAAAGCCCAAGACCCGGACGAG…	MHSSSIHRNTGSIIQPPVPANTNAATDLQQKIEQPKQRSSHSLSSVGKRALKNVSKLFQKSKAPQQKAATPPTVKNVKPSQPTSNSKTAKDKAPVSQLSSNSLDDLEDTRQPVTRAGHSGASTSGTKAQDPDEPATLQSSRQSMMTRSNGGRFELKDEKLVRNSEPQGSIQLDAKGKPDFSTFNTPGLAPLLDSILATPMQTYLAHQSKDGVHGHQLLQANGHLLHLAQDDSSLALIRSSKEALHIEGKKPPAVKLEREDGNIHIDTASGRKTQELPGKAHIAHITGVLLRHDGERMRVHEDRLYQFDPLSARWKAPEGTEDIAFNSLATGGNGSVYAKSDDVVVDLTSPFMPHIEVKDLQSFSVAPDNRAALLSGKETQAILLTDMSPVIGDLTEKKT…	5157	1718
PreICMP16946_AvrE1a_1	PreICMP16946	AvrE	AvrE	AvrE	AvrE1	17	NA	167	GTGCATTCATCATCGATCCACCGCAACACCGGGAGCATCATTCAGCCGCCAGTCCCGGCAAACACGAACGCTGCAACGGATCTACAGCAAAAAATCGAACAACCCAAACAACGCTCCTCGCACTCACTGAGCAGTGTCGGCAAGCGAGCGCTGAAGAACGTCAGCAAACTGTTCCAGAAATCCAAGGCACCGCAGCAGAAAGCGGCCACGCCTCCCACCGTAAAAAACGTCAAGCCTTCACAGCCCACTTCAAATTCGAAGACAGCCAAAGACAAAGCGCCTGTATCTCAGTTATCGAGCAATAGTCTTGATGACCTGGAGGATACGCGCCAGCCAGTGACGCGTGCGGGGCATAGCGGCGCCAGCACTTCCGGCACCAAAGCCCAAGACCCGGACGAG…	MHSSSIHRNTGSIIQPPVPANTNAATDLQQKIEQPKQRSSHSLSSVGKRALKNVSKLFQKSKAPQQKAATPPTVKNVKPSQPTSNSKTAKDKAPVSQLSSNSLDDLEDTRQPVTRAGHSGASTSGTKAQDPDEPATLQSSRQSMMTRSNGGRFELKDEKLVRNSEPQGSIQLDAKGKPDFSTFNTPGLAPLLDSILATPMQTYLAHQSKDGVHGHQLLQANGHLLHLAQDDSSLALIRSSKEALHIEGKKPPAVKLEREDGNIHIDTASGRKTQELPGKAHIAHITGVLLRHDXXXXERMRVHEDRLYQFDPLSARWKAPEGTEDIAFNSLATGGNGSVYAKSDDVVVDLTSPFMPHIEVKDLQSFSVAPDNRAALLSGKETQAILLTDMSPVIGDLTE…	3156	1051
PreICMP16946_AvrE1a_2	PreICMP16946	AvrE	AvrE	AvrE	AvrE1	17	NA	168	ATGGGCTTTACCGATAACAAAGCGCTGGAAAGCGGTTATGAAGCGGTCAAGACATTCCTCAAGTCATTCAAAAAAGCTGATCATGCGGTGAGCGTCAACATGCGCGCAGCCACAGGCAGCAAGGACCAGGCGGAACTGGCCGGGAAATTCAAAAGCATGCTCAAGCAACTGGAGCATGGCGACGATGAAATCGGGCTGCAACGCAGTTACGGACTGAACCTTACCACCCCGTTCATCATTCTTGCCGACAAGGCCACAGGAATATGGCCAACGGCAGGTACCACCGGCAACCGTAACTACATACTCAATGCCGAGCGTTGCGAGGGCGGCGTTACCCTGTACCTGATCAGCGAAGGTGCGGGAAACGTAAGCGGTGGCTTCGGTGCCGGCAAAGACTAC…	MGFTDNKALESGYEAVKTFLKSFKKADHAVSVNMRAATGSKDQAELAGKFKSMLKQLEHGDDEIGLQRSYGLNLTTPFIILADKATGIWPTAGTTGNRNYILNAERCEGGVTLYLISEGAGNVSGGFGAGKDYWPGFFDENHPARSVDVGNNRTLPPNFRLGVDVTATVAASQRAGVVFNVPDEDIDAFVDDLFEGKLNPLQVLKKAVDHETYQARRFNFDLTAGGTADLRSGINLTEDRDPDADPNSNSFSAVVRGGFAANITVNLMTYTDYSLTQKNDKTELREGGKNRPRFLNNATLGGQLRGQLRGQIGGTHTAPTGTPASAPGPTPASQSAANNLGVAVNFSVENRTVKRVKFRYNVAKPITTEGLGKLSKSLGEAFKDSTTKAKLAELADPLN…	1932	643
PrhICMP9756_AvrE1a_1	PrhICMP9756	AvrE	AvrE	AvrE	AvrE1	17	NA	169	GTGCATTCATCATCGATCCACCGCAACACCGGGAGCATCATTCAGCCGCCAGTCCCGGCAAACACGAACGCTGCAACGGATCTACAGCAAAAAATCGAACAACCCAAACAACGCTCCTCGCACTCACTGAGCAGTGTCGGCAAGCGAGCGCTGAAGAACGTCAGCAAACTGTTCCAGAAATCCAAGGCACCGCAGCAGAAAGCGGCCACGCCTCCCACCGTAAAAAACGTCAAGCCTTCACAGCCCACTTCAAATTCGAAGACAGCCAAAGACAAAGCGCCTGTATCTCAGTTATCGAGCAATAGTCTTGATGACCTGGAGGATACGCGCCAGCCAGTGACGCGTGCGGGGCATAGCGGCGCCAGCACTTTCGGCACCAAAGCCCAAGACCCGGACGAG…	MHSSSIHRNTGSIIQPPVPANTNAATDLQQKIEQPKQRSSHSLSSVGKRALKNVSKLFQKSKAPQQKAATPPTVKNVKPSQPTSNSKTAKDKAPVSQLSSNSLDDLEDTRQPVTRAGHSGASTFGTKAQDPDEPATLQSSRQSMMTRSNGGRFDLKDEKLVRNSEPQGSIQLDAKGKPDFSTFNTPGLAPLLDSILATPMQTYLAHQSKDGVHGHQLLQANGHLLHLAQDDSSLALIRSSKEALHIEGKKPPAVKLEREDGNIHIDTASGRKTQELPGKAHIAHITGVLLRHDGERMRVHEDRLYQFDPLSARWKAPEGTEDIAFNSLATGGNGSVYAKSDDVVVDLTSPFMPHIEVKDLQSFSVAPDNRAALLSGKETQAILLTDMSPVIGDLTEKKT…	5145	1714
PsaICMP19198_AvrE1a_1	PsaICMP19198	AvrE	AvrE	AvrE	AvrE1	17	NA	170	GTGCATTCATCATCGATCCACCGCAACACCGGAAGCATCATTCAGCCGCCAGTCCCGGCAAATACGAACGCTGCAACTGATCTACAGCAAAAAACCGAACAACCCAAGCAGCGCTCCTCGCACTCACTGAGCAGTGTCGGCAAGCGAGCGCTGAAGAACGTCAGCAAACTGTTCCAGAAATCCAAGGCACCGCAGCAGAAAGCGGCCACGCCTTCCACCGTAAAAAACGTCAAGCCTTCACAGCCCACTTCAAATGCGAAGACAGCCAAAGATAAAGCGCCTGTATCTCAGTTATCGAGCAATAGTCTTGATGACCTGGACGATACGCGCCAGCCAGTGACGCGTGCGGGGCATAGCGGCGCCAGCACTTCCGGCACCAAAGCCCAAGACCCGGACGAG…	MHSSSIHRNTGSIIQPPVPANTNAATDLQQKTEQPKQRSSHSLSSVGKRALKNVSKLFQKSKAPQQKAATPSTVKNVKPSQPTSNAKTAKDKAPVSQLSSNSLDDLDDTRQPVTRAGHSGASTSGTKAQDPDEPATLQSSRQSMMTRSNGGRFELKDEKLVRNSEPQGSIQLDAKGKPDFSTFNTPGLAPLLDSILATPRQTYLAHQSKDGVHGHQLLQANGHLLHLAQDDSSLALIRSSKEALHIEGKKPPAVKLEREDGNIHVDTASGRKTQELPGKAHIAHITGVLLRHDGERMRVHEDRLYQFDPISARWKAPEGTEDIAFNSLAAGGNGSVYAKSDDVVVDLTSPFMPHVEVKDLQSFSVAPDNRAALLSGKETQAILLTDMSPVIGDLTEKKT…	5145	1714
PsaICMP19589_AvrE1a_1	PsaICMP19589	AvrE	AvrE	AvrE	AvrE1	17	NA	171	GTGCATTCATCATCGATCCACCGCAACACCGGAAGCATCATTCAGCCGCCAGTCCCGGCAAATACGAACGCTGCAACTGATCTACAGCAAAAAACCGAACAACCCAAGCAGCGCTCCTCGCACTCACTGAGCAGTGTCGGCAAGCGAGCGCTGAAGAACGTCAGCAAACTGTTCCAGAAATCCAAGGCACCGCAGCAGAAAGCGGCCACGCCTCCCACCGTAAAAAACGTCAAGCCTTCACAGCCCACTTCAAATGCGAAGACAGCCAAAGATAAAGCGCCTGTATCTCAGTTATCGAGCAATAGTCTTGATGACCTGGACGATACGCGCCAGCCAGTGACGCGTGCGGGGCATAGCGGCGCCAGCACTTCCGGCACCAAAGCCCAAGACCCGGACGAG…	MHSSSIHRNTGSIIQPPVPANTNAATDLQQKTEQPKQRSSHSLSSVGKRALKNVSKLFQKSKAPQQKAATPPTVKNVKPSQPTSNAKTAKDKAPVSQLSSNSLDDLDDTRQPVTRAGHSGASTSGTKAQDPDEPATLQSSRQSMMTRSNGGRFELKDEKLVRNSEPQGSIQLDAKGKPDFSTFNTPGLAPLLDSILATPRQTYLAHQSKDGVHGHQLLQANGHLLHLAQDDSSLALIRSSKEALHIEGKKPPAVKLEREDGNIHVDTASGRKTQELPGKAHIAHITGVLLRHDGERMRVHEDRLYQFDPLSARWKAPEGTEDIAFNSLATGGNGSVYAKSDDVVVDLTSPFMPHVEVKDLQSFSVAPDNRAALLSGKETQAILLTDMSPVIGDLTEKKT…	5145	1714
PseHC_1_AvrE1a_1	PseHC_1	AvrE	AvrE	AvrE	AvrE1	17	NA	172	GTGCATTCATCCTCGATCCACCGCAACACCGGAAGCATCATTCAGCCGCCAGTCCCGGCAAACATGAACGCTGCAACTGATCTACAGCAAAAAATCGAACAACCCAAACAACGCTCCTCCCACTCACTGAGCAGTGTCGGCAAGCGAGCGCTGAAGAACGTCAGCAAACTGTTCCAGAAATCCAAGGCACCGCAGCAGAAAGCGGCCACGCCTCCCACCGTAAAAAACGTCAAGCCTTCACAGCCCACTTCAAATGCGAAGACAGCCAAAGATAAAGCGCCTGTATCTCAGTTATCGAGCAATAGTCTTGATGACCTGGACGATACGCGCCAGCCAGTGATGCGTGCGGGGCATAGCGGCGCCAGCACTTCCGGCACCAAAGCCCAAGACCCGGACGAG…	MHSSSIHRNTGSIIQPPVPANMNAATDLQQKIEQPKQRSSHSLSSVGKRALKNVSKLFQKSKAPQQKAATPPTVKNVKPSQPTSNAKTAKDKAPVSQLSSNSLDDLDDTRQPVMRAGHSGASTSGTKAQDPDEPATVQSSRQSMMTRSNGGRFELKDEKLVRNSEPQGSIQLDAKGKPDFSTFNTPGLAPLLDSILATPRQTYLAHQSKDGVHGHQLLQANGHLLHLAQDDSSLALIRSSKEALHIEGKKPPAVKLEREDGNIHIDTASGRKTQELPGKAHIAHITGVLLRHDGERMRVHEDRLYQFDPLSARWKAPEGTEDIAFNSLATGGNGSVYAKSDDVVVDLTSPFMPHIEVKDLQSFSVAPDNRAALLSGKETQAILLTDMSPVIGDLTEKKT…	5145	1714
PseICMP4995_AvrE1a_1	PseICMP4995	AvrE	AvrE	AvrE	AvrE1	17	NA	172	GTGCATTCATCCTCGATCCACCGCAACACCGGAAGCATCATTCAGCCGCCAGTCCCGGCAAACATGAACGCTGCAACTGATCTACAGCAAAAAATCGAACAACCCAAACAACGCTCCTCCCACTCACTGAGCAGTGTCGGCAAGCGAGCGCTGAAGAACGTCAGCAAACTGTTCCAGAAATCCAAGGCACCGCAGCAGAAAGCGGCCACGCCTCCCACCGTAAAAAACGTCAAGCCTTCACAGCCCACTTCAAATGCGAAGACAGCCAAAGATAAAGCGCCTGTATCTCAGTTATCGAGCAATAGTCTTGATGACCTGGACGATACGCGCCAGCCAGTGATGCGTGCGGGGCATAGCGGCGCCAGCACTTCCGGCACCAAAGCCCAAGACCCGGACGAG…	MHSSSIHRNTGSIIQPPVPANMNAATDLQQKIEQPKQRSSHSLSSVGKRALKNVSKLFQKSKAPQQKAATPPTVKNVKPSQPTSNAKTAKDKAPVSQLSSNSLDDLDDTRQPVMRAGHSGASTSGTKAQDPDEPATVQSSRQSMMTRSNGGRFELKDEKLVRNSEPQGSIQLDAKGKPDFSTFNTPGLAPLLDSILATPRQTYLAHQSKDGVHGHQLLQANGHLLHLAQDDSSLALIRSSKEALHIEGKKPPAVKLEREDGNIHIDTASGRKTQELPGKAHIAHITGVLLRHDGERMRVHEDRLYQFDPLSARWKAPEGTEDIAFNSLATGGNGSVYAKSDDVVVDLTSPFMPHIEVKDLQSFSVAPDNRAALLSGKETQAILLTDMSPVIGDLTEKKT…	5145	1714
PseICMP763_AvrE1a_1	PseICMP763	AvrE	AvrE	AvrE	AvrE1	17	NA	172	GTGCATTCATCCTCGATCCACCGCAACACCGGAAGCATCATTCAGCCGCCAGTCCCGGCAAACATGAACGCTGCAACTGATCTACAGCAAAAAATCGAACAACCCAAACAACGCTCCTCCCACTCACTGAGCAGTGTCGGCAAGCGAGCGCTGAAGAACGTCAGCAAACTGTTCCAGAAATCCAAGGCACCGCAGCAGAAAGCGGCCACGCCTCCCACCGTAAAAAACGTCAAGCCTTCACAGCCCACTTCAAATGCGAAGACAGCCAAAGATAAAGCGCCTGTATCTCAGTTATCGAGCAATAGTCTTGATGACCTGGACGATACGCGCCAGCCAGTGATGCGTGCGGGGCATAGCGGCGCCAGCACTTCCGGCACCAAAGCCCAAGACCCGGACGAG…	MHSSSIHRNTGSIIQPPVPANMNAATDLQQKIEQPKQRSSHSLSSVGKRALKNVSKLFQKSKAPQQKAATPPTVKNVKPSQPTSNAKTAKDKAPVSQLSSNSLDDLDDTRQPVMRAGHSGASTSGTKAQDPDEPATVQSSRQSMMTRSNGGRFELKDEKLVRNSEPQGSIQLDAKGKPDFSTFNTPGLAPLLDSILATPRQTYLAHQSKDGVHGHQLLQANGHLLHLAQDDSSLALIRSSKEALHIEGKKPPAVKLEREDGNIHIDTASGRKTQELPGKAHIAHITGVLLRHDGERMRVHEDRLYQFDPLSARWKAPEGTEDIAFNSLATGGNGSVYAKSDDVVVDLTSPFMPHIEVKDLQSFSVAPDNRAALLSGKETQAILLTDMSPVIGDLTEKKT…	5145	1714
PseICMP3386_AvrE1a_1	PseICMP3386	AvrE	AvrE	AvrE	AvrE1	17	NA	173	GTGCATTCATCCTCGATCCACCGCAACACCGGAAGCATCATTCAGCCGCCAGTCCCGGCAAACATGAACGCTGCAACTGATCTACAGCAAAAAATCGAACAACCCAAACAACGCTCCTCCCACTCACTGAGCAGTGTCGGCAAGCGAGCGCTGAAGAACGTCAGCAAACTGTTCCAGAAATCCAAGGCACCGCAGCAGAAAGCGGCCACGCCTCCCACCGTAAAAAACGTCAAGCCTTCACAGCCCACTTCAAATGCGAAGACAGCCAAAGATAAAGCGCCTGTATCTCAGTTATCGAGCAATAGTCTTGATGACCTGGACGATACGCGCCAGCCAGTGATGCGTGCGGGGCATAGCGGCGCCAGCACTTCCGGCACCAAAGCCCAAGACCCGGACGAG…	MHSSSIHRNTGSIIQPPVPANMNAATDLQQKIEQPKQRSSHSLSSVGKRALKNVSKLFQKSKAPQQKAATPPTVKNVKPSQPTSNAKTAKDKAPVSQLSSNSLDDLDDTRQPVMRAGHSGASTSGTKAQDPDEPATVQSSRQSMMTRSNGGRFELKDEKLVRNSEPQGSIQLDAKGKPDFSTFNTPGLAPLLDSILATPRQTYLAHQSKDGVHGHQLLQANGHLLHLAQDDSSLALIRSSKEALHIEGKKPPAVKLEREDGNIHIDTASGRKTQELPGKAHIAHITGVLLRHDGERMRVHEDRLYQFDPLSARWKAPEGTEDIAFNSLATGGNGSVYAKSDDVVVDLTSPFMPHIEVKDLQSFSVAPDNRAALLSGKETQAILLTDMSPVIGDLTEKKT…	5145	1714
PseICMP7459_AvrE1a_1	PseICMP7459	AvrE	AvrE	AvrE	AvrE1	17	NA	174	GTGCATTCATCCTCGATCCACCGCAACACCGGAAGCATCATTCAGCCGCCAGTCCCGGCAAACATGAACGCTGCAACTGATCTACAGCAAAAAATCGAACAACCCAAACAACGCTCCTCCCACTCACTGAGCAGTGTCGGCAAGCGAGCGCTGAAGAACGTCAGCAAACTGTTCCAGAAATCCAAGGCACCGCAGCAGAAAGCGGCCACGCCTCCCACCGTAAAAAACGTCAAGCCTTCACAGCCCACTTCAAATGCGAAGACAGCCAAAGATAAAGCGCCTGTATCTCAGTTATCGAGCAATAGTCTTGATGACCTGGACGATACGCGCCAGCCAGTGATGCGTGCGGGGCATAGCGGCGCCAGCACTTCCGGCACCAAAGCCCAAGACCCGGACGAG…	MHSSSIHRNTGSIIQPPVPANMNAATDLQQKIEQPKQRSSHSLSSVGKRALKNVSKLFQKSKAPQQKAATPPTVKNVKPSQPTSNAKTAKDKAPVSQLSSNSLDDLDDTRQPVMRAGHSGASTSGTKAQDPDEPATVQSSRQSMMTRSNGGRFELKDEKLVRNSEPQGSIQLDAKGKPDFSTFNTPGLAPLLDSILATPRQTYLAHQSKDGVHGHQLLQANGHLLHLAQDDSSLALIRSSKEALHIEGKKPPAVKLEREDGNIHIDTASGRKTQELPGKAHIAHITGVLLRHDGERMRVHEDRLYQFDPLSARWKAPEGTEDIAFNSLATGGNGSVYAKSDDVVVDLTSPFMPHIEVKDLQSFSVAPDNRAALLSGKETQAILLTDMSPVIGDLTEKKT…	3189	1062
PseICMP7459_AvrE1a_2	PseICMP7459	AvrE	AvrE	AvrE	AvrE1	17	NA	175	ATGGGCTTTACCGATAACAAAGCGCTGGAAAGCGGTTATGAAGCGGTCAAGACATTCCTCAAATCGTTCAAAAAAGCTGACCATGCCGTGAGCGTCAACATGCGCGCAGCCACAGGCAGCAAGGACCAGGCGGAGCTGGCCGGGAAATTCAAAAGCATGCTCAAGCAACTGGAGCATGGCGACGACGAAATCGGGCTGCAACGCAGTTACGGACTGAACCTTACCACCCCGTTCATCATTCTTGCCGACAAGTCCACAGGACTATGGCCAACGGCAGGCACCACCGGCAACCGTAACTACATACTCAATGCCGAGCGTTGCGAGGGCGGCGTTACCCTGTATCTGATCAGCGAAGGTGCGGGAAACGTAAGCGGTGGCTTCGGTGCCGGCAAAGACTAC…	MGFTDNKALESGYEAVKTFLKSFKKADHAVSVNMRAATGSKDQAELAGKFKSMLKQLEHGDDEIGLQRSYGLNLTTPFIILADKSTGLWPTAGTTGNRNYILNAERCEGGVTLYLISEGAGNVSGGFGAGKDYWPGFFDENHPARSVDVGNNRTLTPNFRLGVDVTATVAASQRAGVVFNVPDEDIDAFVDDLFEGKLNPLQVLKKAVDHETYEARRFNFDLTAGGTADLRAGINLTEDRDPDADPNSDSFSAVVRGGFAANITVNLMTYTDYSLTQKNDKTELREGGKNRPRFLNNATLGGQLRGQIGGTHTAPTGTPASAPGPTPASQTAANNLGVAVNFSVENRTVKRVKFRYNVAKPITTEGLGKLSKSLGEAFKDNTTKAKLAELADPLNARYA…	1920	639
Psv0485_9_AvrE1a_1	Psv0485_9	AvrE	AvrE	AvrE	AvrE1	17	NA	176	GTGACTTACGGCGAAAACCCGGTCAAGGTGGTTACAGACATGGGCTTTACCGATAACAAAGCGCTGGAAAGCGGTTATGAAGCGGTCAAGACATTCCTCAAGTCATTCAAAAAAGCTGATCATGCGGTGAGCGTCAACATGCGCGCAGCCACAGGCAGCAAGGACCAGGCGGAACTGGCCGGGAAATTCAAAAGCATGCTCAAGCAACTGGAGCATGGCGACGATGAAATCGGGCTGCAACGCAGTTACGGACTGAACCTTACCACCCCGTTCATCATTCTTGCCGACAAGGCCACAGGAATATGGCCAACGGCAGGTACCACCGGCAACCGTAACTACATACTCAATGCCGAGCGTTGCGAGGGCGGCGTTACCCTGTACCTGATCAGCGAAGGTGCG…	MTYGENPVKVVTDMGFTDNKALESGYEAVKTFLKSFKKADHAVSVNMRAATGSKDQAELAGKFKSMLKQLEHGDDEIGLQRSYGLNLTTPFIILADKATGIWPTAGTTGNRNYILNAERCEGGVTLYLISEGAGNVIGGFGAGKDYWPGFFDENHPARSVDVGNNRTLTPNFRLGVDVTATVAASQRAGVVFNVPDEDIDAFVDDLFEGKLNPLQVLKKAVDHETYQARRFNFDLTAGGTADLRSGINLTEDRDPDADPNSNSFSAVVRGGFAANITVNLMTYTDYSLTQKNDKTELREGGKNRPRFLNNATLGGQLRGQIGGTHTAPTGTPASAPGPTPASQSAANNLGVAVNFSVENRTVKRVKFRYNVAKPITTEGLGKLSKSLGEAFKDSTTKAK…	1959	652
Psv3335_AvrE1a_1	Psv3335	AvrE	AvrE	AvrE	AvrE1	17	NA	177	TTGACCCCCAACTTTCGCCTGGGCGTGGACGTGACAGCCACCGTCGCTGCCAGCCAACGTGCCGGCGTGGTCTTCAATGTTCCGGATGAAGACATCGACGCATTCGTCGACGACCTGTTTGAAGGCAAGCTGAATCCATTGCAGGTGCTTAAAAAAGCAGTAGACCATGAGACCTACCAGGCTCGGCGATTCAACTTCGACCTTACGGCGGGCGGAACTGCCGATCTACGCTCTGGGATAAACCTGACCGAAGACAGAGACCCGGATGCCGATCCCAATAGCAATTCGTTCTCTGCGGTGGTACGCGGCGGATTCGCGGCGAACATCACCGTTAACCTGATGACCTACACCGATTACTCGTTGACCCAGAAAAACGACAAGACCGAGTTGCGCGAAGGC…	MTPNFRLGVDVTATVAASQRAGVVFNVPDEDIDAFVDDLFEGKLNPLQVLKKAVDHETYQARRFNFDLTAGGTADLRSGINLTEDRDPDADPNSNSFSAVVRGGFAANITVNLMTYTDYSLTQKNDKTELREGGKNRPRFLNNATLGGQLRGQLRGQIGGTHTAPTGTPASAPGPTPVSQSAANNLGVAVNFSVENRTVKRVKFRYNVAKPITTEGLGKLSKSLGEAFKDSTTKAKLAELADPLNARYAGKKPDEVIQAHLDGLEELFADTQWQNDKQYKALRGLKRGAVEHRASVNKHSVMDNARFETSKTNLSGLSSESILTKIMGSVREASAPGNAARVAEFMRQDPKLRAMLKDMEGSIGTLARVRLEPKDSLVDKIDEGSLDGTMTQSDFSALL…	1470	489
Psv4352_AvrE1a_1	Psv4352	AvrE	AvrE	AvrE	AvrE1	17	NA	178	GTGCATTCATCATCGATCCACCGCAACACCGGGAGCATCATTCAGCCGCCAGTCCCGGCAAACACGAACGCTGCAACGGATCTACAGCAAAAAATCGAACAACCCAAACAACGCTCCTCGCACTCACTGAGCAGTGTCGGCAAGCGAGCGCTGAAGAACGTCAGCAAACTGTTCCAGAAATCCAAGGCACCGCAGCAGAAAGCGGCCACGCCTCCCACCGTAAAAAACGTCAAGCCTTCACAGCCCACTTCAAATTCGAAGACAGCCAAAGACAAAGCGCCTGTATCTCAGTTATCGAGCAATAGTCTTGATGACCTGGAGGATACGCGCCAGCCAGTGACGCGTGCGGGGCATAGCGGCGCCAGCACTTCCGGCACCAAAGCCCAAGACCCGGACGAG…	MHSSSIHRNTGSIIQPPVPANTNAATDLQQKIEQPKQRSSHSLSSVGKRALKNVSKLFQKSKAPQQKAATPPTVKNVKPSQPTSNSKTAKDKAPVSQLSSNSLDDLEDTRQPVTRAGHSGASTSGTKAQDPDEPATLQSSRQSMMTRSNGGRFELKDEKLVRNSEPQGSIQLDAKGKPDFSTFNTPGLAPLLDSILATPMQTYLAHQSKDGVHGHQLLQANGHLLHLAQDDSSLALIRSSKEALHIEGKKPPAVKLEREDGNIHIDTASGRKTQELPGKAHIAHITGVLLRHDGERMRVHEDRLYQFDPLSARWKAPEGTEDIAFNSLATGGNGSVYAKSDDVVVDLTSPFMPHIEVKDLQSFSVAPDNRAALLSGKETQAILLTDMSPVIGDLTEKKT…	5169	1722
PsvICMP4352_AvrE1a_1	PsvICMP4352	AvrE	AvrE	AvrE	AvrE1	17	NA	178	GTGCATTCATCATCGATCCACCGCAACACCGGGAGCATCATTCAGCCGCCAGTCCCGGCAAACACGAACGCTGCAACGGATCTACAGCAAAAAATCGAACAACCCAAACAACGCTCCTCGCACTCACTGAGCAGTGTCGGCAAGCGAGCGCTGAAGAACGTCAGCAAACTGTTCCAGAAATCCAAGGCACCGCAGCAGAAAGCGGCCACGCCTCCCACCGTAAAAAACGTCAAGCCTTCACAGCCCACTTCAAATTCGAAGACAGCCAAAGACAAAGCGCCTGTATCTCAGTTATCGAGCAATAGTCTTGATGACCTGGAGGATACGCGCCAGCCAGTGACGCGTGCGGGGCATAGCGGCGCCAGCACTTCCGGCACCAAAGCCCAAGACCCGGACGAG…	MHSSSIHRNTGSIIQPPVPANTNAATDLQQKIEQPKQRSSHSLSSVGKRALKNVSKLFQKSKAPQQKAATPPTVKNVKPSQPTSNSKTAKDKAPVSQLSSNSLDDLEDTRQPVTRAGHSGASTSGTKAQDPDEPATLQSSRQSMMTRSNGGRFELKDEKLVRNSEPQGSIQLDAKGKPDFSTFNTPGLAPLLDSILATPMQTYLAHQSKDGVHGHQLLQANGHLLHLAQDDSSLALIRSSKEALHIEGKKPPAVKLEREDGNIHIDTASGRKTQELPGKAHIAHITGVLLRHDGERMRVHEDRLYQFDPLSARWKAPEGTEDIAFNSLATGGNGSVYAKSDDVVVDLTSPFMPHIEVKDLQSFSVAPDNRAALLSGKETQAILLTDMSPVIGDLTEKKT…	5169	1722
PsvICMP13519_AvrE1a_1	PsvICMP13519	AvrE	AvrE	AvrE	AvrE1	17	NA	179	GTGCATTCATCATCGATCCACCGCAACACCGGGAGCATCATTCAGCCGCCAGTCCCGGCAAACACGAACGCTGCAACGGATCTACAGCAAAAAATCGAACAACCCAAACAACGCTCCTCGCACTCACTGAGCAGTGTCGGCAAGCGAGCGCTGAAGAACGTCAGCAAACTGTTCCAGAAATCCAAGGCACCGCAGCAGAAAGCGGCCACGCCTCCCACCGTAAAAAACGTCAAGCCTTCACAGCCCACTTCAAATTCGAAGACAGCCAAAGACAAAGCGCCTGTATCTCAGTTATCGAGCAATAGTCTTGATGACCTGGAGGATACGCGCCAGCCAGTGACGCGTGCGGGGCATAGCGGCGCCAGCACTTCCGGCACCAAAGCCCAAGACCCGGACGAG…	MHSSSIHRNTGSIIQPPVPANTNAATDLQQKIEQPKQRSSHSLSSVGKRALKNVSKLFQKSKAPQQKAATPPTVKNVKPSQPTSNSKTAKDKAPVSQLSSNSLDDLEDTRQPVTRAGHSGASTSGTKAQDPDEPATLQSSRQSMMTRSNGGRFELKDEKLVRNSEPQGSIQLDAKGKPDFSTFNTPGLAPLLDSILATPMQTYLAHQSKDGVHGHQLLQANGHLLHLAQDDSSLALIRSSKEALHIEGKKPPAVKLEREDGNIHIDTASGRKTQELPGKAHIAHITGVLLRHDGERMRVHEDRLYQFDPLSARWKAPEGTEDIAFNSLATGGNGSVYAKSDDVVVDLTSPFMPHIEVKDLQSFSVAPDNRAALLSGKETQAILLTDMSPVIGDLTEKKT…	5145	1714
PsvICMP1411_AvrE1a_1	PsvICMP1411	AvrE	AvrE	AvrE	AvrE1	17	NA	180	GTGCATTCATCATCGATCCACCGCAACACCGGGAGCATCATTCAGCCGCCAGTCCCGGCAAACACGAACGCTGCAACGGATCTACAGCAAAAAATCGAACAACCCAAACAACGCTCCTCGCACTCACTGAGCAGTGTCGGCAAGCGAGCGCTGAAGAACGTCAGCAAACTGTTCCAGAAATCCAAGGCACCGCAGCAGAAAGCGGCCACGCCTCCCACCGTAAAAAACGTCAAGCCTTCACAGCCCACTTCAAATTCGAAGACAGCCAAAGACAAAGCGCCTGTATCTCAGTTATCGAGCAATAGTCTTGATGACCTGGAGGATACGCGCCAGCCAGTGACGCGTGCGGGGCATAGCGGCGCCAGCACTTCCGGCACCAAAGCCCAAGACCCGGACGAG…	MHSSSIHRNTGSIIQPPVPANTNAATDLQQKIEQPKQRSSHSLSSVGKRALKNVSKLFQKSKAPQQKAATPPTVKNVKPSQPTSNSKTAKDKAPVSQLSSNSLDDLEDTRQPVTRAGHSGASTSGTKAQDPDEPATLQSSRQSMMTRSNGGRFELKDEKLVRNSEPQGSIQLDAKGKPDFSTFNTPGLAPLLDSILATPMQTYLAHQSKDGVHGHQLLQANGHLLHLAQDDSSLALIRSSKEALHIEGKKPPAVKLEREDGNIHIDTASGRKTQELPGKAHIAHITGVLLRHDGERMRVHEDRLYQFDPLSARWKAPEGTEDIAFNSLATGGNGSVYAKSDDVVVDLTSPFMPHIEVKDLQSFSVAPDNRAALLSGKETQAILLTDMSPVIGDLTEKKT…	5157	1718
Psy0440_AvrE1a_1	Psy0440	AvrE	AvrE	AvrE	AvrE1	17	NA	181	GTGCATTCATCATCGATCCACCGCAACACCGGAGGCATCATTCAGCCGACAGTCCCGGCAAACACGAACGCTGCAACTGATCTACAGCAAAAAACCGAACAACCCAAACAACGCTCCTCGCACTCACTGAGCAGTGTCGGCAAGCGAGCGCTGAAGAACGTCAGCAAACTGTTCCAGAAATCCAAGGCACCGCAGCAGAAAGCGGCCACGCCTCCCACCGTAAAAAACGTCAAGCCTTCACAGCCCACTTCAAATGCGAAGACAGCCAAAAATAAAGCGCCTGTATCTCAGTTATCGAGCAATAGTCTTGATGACCTGGACGATACGCGCCAGCCAGTGACGCGTGCGGGGCATAGCGGCGCCAGCACTTCCGGCACCAAAGCCCAAGACCCGGACGAG…	MHSSSIHRNTGGIIQPTVPANTNAATDLQQKTEQPKQRSSHSLSSVGKRALKNVSKLFQKSKAPQQKAATPPTVKNVKPSQPTSNAKTAKNKAPVSQLSSNSLDDLDDTRQPVTRAGHSGASTSGTKAQDPDEPATIQSSRQSMMTRSNGGRFELKDEKLVRNSEPQGSIQLDAKGKPDFSTFNTPGLAPLLDSILATPRQTYLAHQSKDGVHGHQLLQANGHLLHLAQDDSSLALIRSSKEALHIEGKKPPAVKLEREDGNIHIDTASGRKTQELPGKAHIAHITGVLLRHDGERMRVHEDRLYQFDPLSARWKAPEGTEDIAFNSLATGGNGSVYAKSDDVVVDLTSPFMPHIEVKDLQSFSVAPDNRAALLSGKETQAILLTDMSPVIGDLTEKKT…	5145	1714
Psy0467_AvrE1a_1	Psy0467	AvrE	AvrE	AvrE	AvrE1	17	NA	181	GTGCATTCATCATCGATCCACCGCAACACCGGAGGCATCATTCAGCCGACAGTCCCGGCAAACACGAACGCTGCAACTGATCTACAGCAAAAAACCGAACAACCCAAACAACGCTCCTCGCACTCACTGAGCAGTGTCGGCAAGCGAGCGCTGAAGAACGTCAGCAAACTGTTCCAGAAATCCAAGGCACCGCAGCAGAAAGCGGCCACGCCTCCCACCGTAAAAAACGTCAAGCCTTCACAGCCCACTTCAAATGCGAAGACAGCCAAAAATAAAGCGCCTGTATCTCAGTTATCGAGCAATAGTCTTGATGACCTGGACGATACGCGCCAGCCAGTGACGCGTGCGGGGCATAGCGGCGCCAGCACTTCCGGCACCAAAGCCCAAGACCCGGACGAG…	MHSSSIHRNTGGIIQPTVPANTNAATDLQQKTEQPKQRSSHSLSSVGKRALKNVSKLFQKSKAPQQKAATPPTVKNVKPSQPTSNAKTAKNKAPVSQLSSNSLDDLDDTRQPVTRAGHSGASTSGTKAQDPDEPATIQSSRQSMMTRSNGGRFELKDEKLVRNSEPQGSIQLDAKGKPDFSTFNTPGLAPLLDSILATPRQTYLAHQSKDGVHGHQLLQANGHLLHLAQDDSSLALIRSSKEALHIEGKKPPAVKLEREDGNIHIDTASGRKTQELPGKAHIAHITGVLLRHDGERMRVHEDRLYQFDPLSARWKAPEGTEDIAFNSLATGGNGSVYAKSDDVVVDLTSPFMPHIEVKDLQSFSVAPDNRAALLSGKETQAILLTDMSPVIGDLTEKKT…	5145	1714
[truncated: 14,127 more rows]
